# Supplementary material for: Methylome and transcriptome data integration reveals potential roles of DNA methylation and candidate biomarkers of cow Streptococcus uberis subclinical mastitis
Source: Research Square preprint supplement (doi:10.21203/rs.3.rs-1634423/v1), 2022-05-13
Supplement: Supplementary file 1 [file 1ea641934c74b1430d79f29f.xlsx]

## Sheet: genelist_dmc_gene_promter_full
	gene_NM_id	gene_id	gene_symbol	gene_name	hyper_CpG_gene	hypo_CpG_gene	total_dmc_CpG_gene	hyper_CHG_gene	hypo_CHG_gene	total_dmc_CHG_gene	hyper_CHH_gene	hypo_CHH_gene	total_dmc_CHH_gene	total_hyper	total_hypo	total	hyper_CpG_promoter	hypo_CpG_promoter	total_dmc_CpG_promoter	hyper_CHG_promoter	hypo_CHG_promoter	total_dmc_CHG_promoter	hyper_CHH_promoter	hypo_CHH_promoter	total_dmc_CHH_promoter	total_promoter	Total	IF DE	Num DR	IF_selected_by_Methget
2500	NM_001079638	780777	CTNNA3	catenin alpha 3 (CTNNA3), mRNA.	119	64	183	4	8	12	24	36	60	147	108	255	0	0	0	0	0	0	0	0	0	0	255	#N/A	#N/A	#N/A
5331	NM_001199065	530858	PRKN	parkin RBR E3 ubiquitin protein ligase (PRKN), mRNA.	57	129	186	10	1	11	12	25	37	79	155	234	0	0	0	0	0	0	0	0	0	0	234	#N/A	#N/A	#N/A
2350	NM_001077932	516989	RALYL	RALY RNA binding protein like (RALYL), mRNA.	45	127	172	12	2	14	36	11	47	93	140	233	0	0	0	0	0	0	0	0	0	0	233	#N/A	4	#N/A
4852	NM_001192550	521982	NBAS	neuroblastoma amplified sequence (NBAS), mRNA.	92	68	160	8	3	11	23	21	44	123	92	215	0	0	0	0	0	0	0	0	0	0	215	#N/A	2	#N/A
3931	NM_001105029	100125389	MACROD2	mono-ADP ribosylhydrolase 2 (MACROD2), mRNA.	45	94	139	3	4	7	18	20	38	66	118	184	0	0	0	0	0	0	0	0	0	0	184	#N/A	#N/A	#N/A
1710	NM_001075818	521304	RBFOX1	RNA binding fox-1 homolog 1 (RBFOX1), mRNA.	77	70	147	2	4	6	12	15	27	91	89	180	0	0	0	0	0	0	0	0	0	0	180	#N/A	#N/A	#N/A
955	NM_001038532	512545	ITFG1	integrin alpha FG-GAP repeat containing 1 (ITFG1), mRNA.	109	1	110	0	9	9	0	40	40	109	50	159	0	0	0	0	0	0	0	0	0	0	159	#N/A	#N/A	#N/A
6417	NM_174040	281123	DPP6	dipeptidyl peptidase like 6 (DPP6), mRNA.	66	63	129	1	4	5	6	18	24	73	85	158	0	0	0	0	0	0	0	0	0	0	158	#N/A	#N/A	#N/A
2981	NM_001098095	538602	EXT1	exostosin glycosyltransferase 1 (EXT1), mRNA.	16	82	98	12	0	12	22	2	24	50	84	134	0	0	0	0	0	0	0	0	0	0	134	#N/A	4	#N/A
4450	NM_001191309	100137872	AKT3	AKT serine/threonine kinase 3 (AKT3), mRNA.	37	61	98	6	1	7	17	6	23	60	68	128	0	0	0	0	0	0	0	0	0	0	128	#N/A	4	#N/A
5085	NM_001192898	537171	DGKB	diacylglycerol kinase beta (DGKB), mRNA.	35	52	87	12	1	13	16	12	28	63	65	128	0	0	0	0	0	0	0	0	0	0	128	#N/A	#N/A	#N/A
6339	NM_173883	280706	TG	thyroglobulin (TG), mRNA.	25	68	93	5	3	8	24	3	27	54	74	128	0	0	0	0	0	0	0	0	0	0	128	#N/A	1	#N/A
1850	NM_001076068	535743	SLC9A9	solute carrier family 9 member A9 (SLC9A9), mRNA.	45	56	101	3	3	6	10	7	17	58	66	124	0	1	1	0	0	0	0	0	0	2	126	-2.32894	#N/A	#N/A
5343	NM_001205307	511615	TENM3	teneurin transmembrane protein 3 (TENM3), mRNA.	41	48	89	3	3	6	7	11	18	51	62	113	0	0	0	0	0	0	0	2	2	4	117	#N/A	#N/A	#N/A
5698	NM_001205986	531405	SORCS3	sortilin related VPS10 domain containing receptor 3 (SORCS3), mRNA.	17	30	47	3	0	3	33	34	67	53	64	117	0	0	0	0	0	0	0	0	0	0	117	#N/A	#N/A	#N/A
2138	NM_001076862	518366	SNX29	sorting nexin 29 (SNX29), mRNA.	52	46	98	3	1	4	5	8	13	60	55	115	0	0	0	0	0	0	0	0	0	0	115	#N/A	#N/A	#N/A
6062	NM_001206757	530999	CLSTN2	calsyntenin 2 (CLSTN2), mRNA.	21	57	78	5	2	7	14	8	22	40	67	107	0	0	0	0	0	0	0	0	0	0	107	#N/A	1	#N/A
4393	NM_001191179	517451	ZDHHC14	zinc finger DHHC-type palmitoyltransferase 14 (ZDHHC14), mRNA.	25	59	84	3	0	3	14	5	19	42	64	106	0	0	0	0	0	0	0	0	0	0	106	#N/A	#N/A	#N/A
1041	NM_001040646	692183	FHIT	fragile histidine triad diadenosine triphosphatase (FHIT), mRNA.	58	36	94	1	2	3	1	6	7	60	44	104	0	0	0	0	0	0	0	0	0	0	104	#N/A	#N/A	#N/A
1128	NM_001046047	510019	CYRIB	CYFIP related Rac1 interactor B (CYRIB), mRNA.	68	12	80	1	4	5	3	16	19	72	32	104	0	0	0	0	0	0	0	0	0	0	104	#N/A	1	#N/A
6631	NM_174436	282004	PRKG1	protein kinase cGMP-dependent 1 (PRKG1), mRNA.	26	57	83	1	2	3	7	8	15	34	67	101	0	0	0	0	0	0	0	0	0	0	101	3.76785	#N/A	PRKG1
2434	NM_001078092	618792	WWOX	WW domain containing oxidoreductase (WWOX), mRNA.	39	51	90	0	0	0	4	4	8	43	55	98	0	0	0	0	0	0	0	0	0	0	98	-1.52616	#N/A	#N/A
4552	NM_001191503	100295505	ZNF804B	zinc finger protein 804B (ZNF804B), mRNA.	67	7	74	0	9	9	2	13	15	69	29	98	0	0	0	0	0	0	0	0	0	0	98	#N/A	#N/A	#N/A
4413	NM_001191215	785433	FHOD3	formin homology 2 domain containing 3 (FHOD3), mRNA.	22	49	71	8	4	12	6	2	8	36	55	91	0	3	3	0	0	0	0	0	0	6	97	#N/A	#N/A	#N/A
6070	NM_001206776	784403	CDK14	cyclin dependent kinase 14 (CDK14), mRNA.	29	54	83	2	1	3	4	7	11	35	62	97	0	0	0	0	0	0	0	0	0	0	97	-2.01934	#N/A	#N/A
6492	NM_174192	281511	SYT1	synaptotagmin 1 (SYT1), mRNA.	40	35	75	0	5	5	2	9	11	42	49	91	0	0	0	0	0	0	0	0	0	0	91	-4.61575	#N/A	#N/A
3011	NM_001098142	618622	FTO	FTO alpha-ketoglutarate dependent dioxygenase (FTO), mRNA.	17	57	74	1	1	2	9	2	11	27	60	87	0	1	1	0	0	0	0	0	0	2	89	#N/A	#N/A	#N/A
5418	NM_001205489	614554	TBC1D5	TBC1 domain family member 5 (TBC1D5), mRNA.	54	19	73	1	5	6	2	8	10	57	32	89	0	0	0	0	0	0	0	0	0	0	89	#N/A	#N/A	#N/A
4524	NM_001191450	615883	SLIT3	slit guidance ligand 3 (SLIT3), mRNA.	42	40	82	0	2	2	1	1	2	43	43	86	0	0	0	0	0	0	0	1	1	2	88	#N/A	#N/A	#N/A
6610	NM_174404	281950	NRXN1	neurexin 1 (NRXN1), transcript variant 1, mRNA.	27	35	62	2	3	5	12	9	21	41	47	88	0	0	0	0	0	0	0	0	0	0	88	#N/A	1	#N/A
6756	NM_174680	282573	KCNMA1	potassium calcium-activated channel subfamily M alpha 1 (KCNMA1), mRNA.	48	26	74	1	2	3	3	8	11	52	36	88	0	0	0	0	0	0	0	0	0	0	88	#N/A	#N/A	#N/A
4408	NM_001191206	784716	CDH23	cadherin related 23 (CDH23), mRNA.	24	43	67	5	2	7	7	6	13	36	51	87	0	0	0	0	0	0	0	0	0	0	87	-2.03352	#N/A	#N/A
2	NM_001001134	407132	SLCO3A1	solute carrier organic anion transporter family member 3A1 (SLCO3A1), mRNA.	32	36	68	7	0	7	4	7	11	43	43	86	0	0	0	0	0	0	0	0	0	0	86	#N/A	#N/A	#N/A
4927	NM_001192668	528860	CHST11	carbohydrate sulfotransferase 11 (CHST11), mRNA.	65	11	76	0	1	1	0	7	7	65	19	84	1	0	1	0	0	0	0	0	0	2	86	1.1371	#N/A	#N/A
2066	NM_001076484	617930	ASIC2	acid sensing ion channel subunit 2 (ASIC2), mRNA.	18	58	76	2	0	2	4	2	6	24	60	84	0	0	0	0	0	0	0	0	0	0	84	#N/A	#N/A	#N/A
5694	NM_001205980	530483	URB1	URB1 ribosome biogenesis homolog (URB1), mRNA.	0	63	63	5	0	5	15	0	15	20	63	83	0	0	0	0	0	0	0	0	0	0	83	#N/A	#N/A	#N/A
6847	NM_175788	327666	SIRPA	signal regulatory protein alpha (SIRPA), mRNA.	52	9	61	1	6	7	1	12	13	54	27	81	0	1	1	0	0	0	0	0	0	2	83	#N/A	#N/A	#N/A
2035	NM_001076432	616742	EFNA5	ephrin A5 (EFNA5), mRNA.	29	31	60	2	3	5	11	5	16	42	39	81	0	0	0	0	0	0	0	0	0	0	81	#N/A	1	#N/A
2084	NM_001076534	767602	AP3B1	adaptor related protein complex 3 subunit beta 1 (AP3B1), mRNA.	18	47	65	2	0	2	10	2	12	30	49	79	1	0	1	0	0	0	0	0	0	2	81	#N/A	#N/A	AP3B1
2019	NM_001076390	615681	SLC39A11	solute carrier family 39 member 11 (SLC39A11), mRNA.	26	40	66	3	3	6	5	3	8	34	46	80	0	0	0	0	0	0	0	0	0	0	80	#N/A	#N/A	#N/A
5473	NM_001205588	506466	LARGE1	LARGE xylosyl- and glucuronyltransferase 1 (LARGE1), mRNA.	25	43	68	0	4	4	3	2	5	28	49	77	0	0	0	0	0	0	0	0	0	0	77	#N/A	#N/A	#N/A
4832	NM_001192518	520004	UNC5D	unc-5 netrin receptor D (UNC5D), mRNA.	10	21	31	0	0	0	26	18	44	36	39	75	0	0	0	0	0	0	0	0	0	0	75	#N/A	#N/A	#N/A
5755	NM_001206073	535136	DIP2C	disco interacting protein 2 homolog C (DIP2C), mRNA.	45	15	60	1	1	2	5	6	11	51	22	73	1	0	1	0	0	0	0	0	0	2	75	#N/A	1	#N/A
5964	NM_001206515	506199	KIAA1797	KIAA1797 ortholog (KIAA1797), mRNA.	16	18	34	1	0	1	12	26	38	29	44	73	0	0	0	0	0	0	0	0	0	0	73	#N/A	#N/A	#N/A
6857	NM_175821	327705	ASAP1	ArfGAP with SH3 domain, ankyrin repeat and PH domain 1 (ASAP1), mRNA.	41	30	71	1	0	1	0	1	1	42	31	73	0	0	0	0	0	0	0	0	0	0	73	#N/A	1	#N/A
2251	NM_001077051	767990	ATXN10	ataxin 10 (ATXN10), mRNA.	8	47	55	6	0	6	10	1	11	24	48	72	0	0	0	0	0	0	0	0	0	0	72	#N/A	1	#N/A
2583	NM_001080331	617688	GMDS	GDP-mannose 4,6-dehydratase (GMDS), mRNA.	27	37	64	3	0	3	3	1	4	33	38	71	0	0	0	0	0	0	0	0	0	0	71	2.06437	#N/A	#N/A
4167	NM_001122729	615745	GBE1	1,4-alpha-glucan branching enzyme 1 (GBE1), mRNA.	14	43	57	4	3	7	6	0	6	24	46	70	0	0	0	0	0	0	0	0	0	0	70	#N/A	1	#N/A
5403	NM_001205469	506753	LRRC1	leucine rich repeat containing 1 (LRRC1), mRNA.	21	39	60	3	0	3	5	0	5	29	39	68	0	1	1	0	0	0	0	0	0	2	70	3.27732	#N/A	#N/A
5643	NM_001205895	522344	RGL1	ral guanine nucleotide dissociation stimulator like 1 (RGL1), mRNA.	16	36	52	4	0	4	4	7	11	24	43	67	0	1	1	0	0	0	0	0	0	2	69	#N/A	1	#N/A
5688	NM_001205973	530042	NLGN1	neuroligin 1 (NLGN1), mRNA.	25	34	59	0	3	3	1	6	7	26	43	69	0	0	0	0	0	0	0	0	0	0	69	#N/A	#N/A	#N/A
6418	NM_174041	281124	DPYD	dihydropyrimidine dehydrogenase (DPYD), mRNA.	12	51	63	3	1	4	2	0	2	17	52	69	0	0	0	0	0	0	0	0	0	0	69	1.49375	#N/A	#N/A
2223	NM_001077000	767927	TAFA5	TAFA chemokine like family member 5 (TAFA5), mRNA.	31	22	53	0	0	0	3	6	9	34	28	62	3	0	3	0	0	0	0	0	0	6	68	#N/A	1	#N/A
4653	NM_001192171	539099	HMBOX1	homeobox containing 1 (HMBOX1), mRNA.	20	28	48	2	3	5	9	6	15	31	37	68	0	0	0	0	0	0	0	0	0	0	68	#N/A	#N/A	#N/A
5673	NM_001205945	527790	WDFY4	WDFY family member 4 (WDFY4), mRNA.	26	29	55	0	3	3	0	10	10	26	42	68	0	0	0	0	0	0	0	0	0	0	68	#N/A	#N/A	WDFY4
2036	NM_001076435	616873	TAFA4	TAFA chemokine like family member 4 (TAFA4), mRNA.	16	32	48	1	4	5	11	3	14	28	39	67	0	0	0	0	0	0	0	0	0	0	67	#N/A	1	#N/A
2638	NM_001081547	781721	C16H1orf21	chromosome 16 C1orf21 homolog (C16H1orf21), mRNA.	27	33	60	0	0	0	4	3	7	31	36	67	0	0	0	0	0	0	0	0	0	0	67	#N/A	1	#N/A
2955	NM_001098050	521194	MAML2	mastermind like transcriptional coactivator 2 (MAML2), mRNA.	17	22	39	3	1	4	9	15	24	29	38	67	0	0	0	0	0	0	0	0	0	0	67	#N/A	#N/A	#N/A
4394	NM_001191180	783254	SAMD12	sterile alpha motif domain containing 12 (SAMD12), mRNA.	14	42	56	0	1	1	4	6	10	18	49	67	0	0	0	0	0	0	0	0	0	0	67	3.72777	#N/A	SAMD12
4409	NM_001191207	537536	SORCS1	sortilin-related VPS10 domain containing receptor 1 (SORCS1), mRNA.	13	17	30	1	0	1	11	25	36	25	42	67	0	0	0	0	0	0	0	0	0	0	67	#N/A	#N/A	#N/A
5095	NM_001192911	537594	PHACTR1	phosphatase and actin regulator 1 (PHACTR1), mRNA.	19	38	57	2	1	3	4	3	7	25	42	67	0	0	0	0	0	0	0	0	0	0	67	#N/A	#N/A	#N/A
6019	NM_001206656	505542	MSI2	musashi RNA binding protein 2 (MSI2), mRNA.	22	13	35	0	2	2	10	20	30	32	35	67	0	0	0	0	0	0	0	0	0	0	67	3.05909	#N/A	#N/A
2603	NM_001080370	788066	TPK1	thiamin pyrophosphokinase 1 (TPK1), mRNA.	29	31	60	2	0	2	2	2	4	33	33	66	0	0	0	0	0	0	0	0	0	0	66	#N/A	#N/A	#N/A
5414	NM_001205484	538566	HS6ST3	heparan sulfate 6-O-sulfotransferase 3 (HS6ST3), mRNA.	22	32	54	0	2	2	3	6	9	25	40	65	0	0	0	0	0	0	0	0	0	0	65	#N/A	#N/A	#N/A
6429	NM_174061	281172	FSHR	follicle stimulating hormone receptor (FSHR), mRNA.	17	30	47	4	1	5	5	8	13	26	39	65	0	0	0	0	0	0	0	0	0	0	65	#N/A	#N/A	#N/A
4844	NM_001192537	521326	HMCN1	hemicentin 1 (HMCN1), mRNA.	15	37	52	2	1	3	4	5	9	21	43	64	0	0	0	0	0	0	0	0	0	0	64	#N/A	1	#N/A
5341	NM_001205298	506264	CRIM1	cysteine rich transmembrane BMP regulator 1 (CRIM1), mRNA.	7	42	49	1	0	1	10	2	12	18	44	62	0	1	1	0	0	0	0	0	0	2	64	#N/A	#N/A	#N/A
5355	NM_001205368	100336456	LSAMP	limbic system associated membrane protein (LSAMP), mRNA.	17	11	28	0	0	0	13	23	36	30	34	64	0	0	0	0	0	0	0	0	0	0	64	#N/A	#N/A	#N/A
11	NM_001001156	407229	ADAM12	ADAM metallopeptidase domain 12 (ADAM12), mRNA.	20	35	55	0	2	2	3	3	6	23	40	63	0	0	0	0	0	0	0	0	0	0	63	#N/A	#N/A	#N/A
1257	NM_001046333	532713	CAMK2D	calcium/calmodulin dependent protein kinase II delta (CAMK2D), mRNA.	43	6	49	1	4	5	0	9	9	44	19	63	0	0	0	0	0	0	0	0	0	0	63	#N/A	#N/A	#N/A
2424	NM_001078070	617222	DPP10	dipeptidyl peptidase like 10 (DPP10), mRNA.	8	1	9	1	17	18	8	28	36	17	46	63	0	0	0	0	0	0	0	0	0	0	63	#N/A	#N/A	DPP10
6026	NM_001206681	505290	MGLL	monoglyceride lipase (MGLL), mRNA.	42	14	56	0	2	2	2	3	5	44	19	63	0	0	0	0	0	0	0	0	0	0	63	#N/A	#N/A	#N/A
6894	NM_177501	281177	FUT8	fucosyltransferase 8 (FUT8), mRNA.	32	1	33	0	0	0	4	26	30	36	27	63	0	0	0	0	0	0	0	0	0	0	63	#N/A	#N/A	#N/A
1564	NM_001075500	511211	SPOCK1	SPARC (osteonectin), cwcv and kazal like domains proteoglycan 1 (SPOCK1), mRNA.	18	33	51	0	1	1	2	8	10	20	42	62	0	0	0	0	0	0	0	0	0	0	62	#N/A	#N/A	#N/A
4445	NM_001191298	615819	GALNTL6	polypeptide N-acetylgalactosaminyltransferase like 6 (GALNTL6), mRNA.	14	40	54	0	1	1	7	0	7	21	41	62	0	0	0	0	0	0	0	0	0	0	62	#N/A	#N/A	#N/A
513	NM_001034607	534337	SH3YL1	SH3 and SYLF domain containing 1 (SH3YL1), mRNA.	4	36	40	2	0	2	19	0	19	25	36	61	0	0	0	0	0	0	0	0	0	0	61	2.197	1	#N/A
1841	NM_001076055	535362	GRM7	glutamate metabotropic receptor 7 (GRM7), mRNA.	14	43	57	0	0	0	3	0	3	17	43	60	0	0	0	0	0	0	0	0	0	0	60	#N/A	#N/A	#N/A
2431	NM_001078085	618028	KIRREL3	kirre like nephrin family adhesion molecule 3 (KIRREL3), mRNA.	21	30	51	2	1	3	3	3	6	26	34	60	0	0	0	0	0	0	0	0	0	0	60	#N/A	#N/A	#N/A
3746	NM_001102345	787444	NKAIN2	sodium/potassium transporting ATPase interacting 2 (NKAIN2), mRNA.	18	33	51	1	1	2	3	4	7	22	38	60	0	0	0	0	0	0	0	0	0	0	60	#N/A	#N/A	#N/A
5959	NM_001206505	538979	MED12L	mediator complex subunit 12L (MED12L), mRNA.	13	33	46	2	0	2	8	4	12	23	37	60	0	0	0	0	0	0	0	0	0	0	60	2.02963	2	#N/A
6028	NM_001206687	505469	FOXN3	forkhead box N3 (FOXN3), mRNA.	12	47	59	0	0	0	1	0	1	13	47	60	0	0	0	0	0	0	0	0	0	0	60	#N/A	#N/A	#N/A
1386	NM_001046623	618777	SAMM50	SAMM50 sorting and assembly machinery component (SAMM50), mRNA.	23	16	39	3	2	5	10	5	15	36	23	59	0	0	0	0	0	0	0	0	0	0	59	#N/A	#N/A	#N/A
1977	NM_001076316	614203	GALNT18	polypeptide N-acetylgalactosaminyltransferase 18 (GALNT18), mRNA.	18	33	51	3	2	5	1	2	3	22	37	59	0	0	0	0	0	0	0	0	0	0	59	#N/A	#N/A	#N/A
3801	NM_001102543	100124500	STYXL2	serine/threonine/tyrosine interacting like 2 (STYXL2), mRNA.	1	41	42	2	0	2	8	1	9	11	42	53	2	1	3	0	0	0	0	0	0	6	59	#N/A	1	#N/A
5410	NM_001205478	539977	NRG3	neuregulin 3 (NRG3), mRNA.	12	34	46	0	1	1	2	10	12	14	45	59	0	0	0	0	0	0	0	0	0	0	59	#N/A	#N/A	#N/A
2405	NM_001078030	540939	THSD4	thrombospondin type 1 domain containing 4 (THSD4), mRNA.	23	20	43	0	0	0	0	13	13	23	33	56	0	1	1	0	0	0	0	0	0	2	58	#N/A	#N/A	#N/A
6199	NM_001256559	512740	PRKDC	protein kinase, DNA-activated, catalytic subunit (PRKDC), mRNA.	31	12	43	1	5	6	1	8	9	33	25	58	0	0	0	0	0	0	0	0	0	0	58	#N/A	#N/A	#N/A
3036	NM_001098867	504824	NARS2	asparaginyl-tRNA synthetase 2, mitochondrial (NARS2), mRNA; nuclear gene for mitochondrial product.	10	23	33	1	0	1	14	3	17	25	26	51	0	3	3	0	0	0	0	0	0	6	57	#N/A	#N/A	#N/A
6056	NM_001206743	782187	THSD7A	thrombospondin, type I, domain containing 7A (THSD7A), mRNA.	9	34	43	3	2	5	8	1	9	20	37	57	0	0	0	0	0	0	0	0	0	0	57	#N/A	#N/A	#N/A
6477	NM_174169	281452	RGS7	regulator of G protein signaling 7 (RGS7), mRNA.	33	8	41	1	2	3	3	10	13	37	20	57	0	0	0	0	0	0	0	0	0	0	57	#N/A	1	#N/A
1939	NM_001076248	540923	CPQ	carboxypeptidase Q (CPQ), mRNA.	11	15	26	0	0	0	13	17	30	24	32	56	0	0	0	0	0	0	0	0	0	0	56	#N/A	#N/A	#N/A
2025	NM_001076409	616115	NFKB1	nuclear factor kappa B subunit 1 (NFKB1), mRNA.	8	36	44	1	0	1	6	5	11	15	41	56	0	0	0	0	0	0	0	0	0	0	56	1.07163	#N/A	#N/A
4562	NM_001191524	100139141	SHROOM3	shroom family member 3 (SHROOM3), mRNA.	5	3	8	3	6	9	15	23	38	23	32	55	0	0	0	0	0	0	0	0	0	0	55	#N/A	#N/A	#N/A
5052	NM_001192853	535387	BBS9	Bardet-Biedl syndrome 9 (BBS9), mRNA.	5	21	26	0	1	1	16	12	28	21	34	55	0	0	0	0	0	0	0	0	0	0	55	#N/A	#N/A	#N/A
5626	NM_001205872	520454	RAPGEF1	Rap guanine nucleotide exchange factor 1 (RAPGEF1), mRNA.	37	3	40	0	4	4	0	11	11	37	18	55	0	0	0	0	0	0	0	0	0	0	55	#N/A	#N/A	#N/A
5948	NM_001206483	539126	NTRK3	neurotrophic receptor tyrosine kinase 3 (NTRK3), mRNA.	10	35	45	2	1	3	4	3	7	16	39	55	0	0	0	0	0	0	0	0	0	0	55	#N/A	#N/A	#N/A
6859	NM_176608	280805	GHR	growth hormone receptor (GHR), mRNA.	22	15	37	1	2	3	0	15	15	23	32	55	0	0	0	0	0	0	0	0	0	0	55	#N/A	#N/A	#N/A
201	NM_001015625	520639	CLPB	caseinolytic mitochondrial matrix peptidase chaperone subunit B (CLPB), mRNA.	38	4	42	0	3	3	0	9	9	38	16	54	0	0	0	0	0	0	0	0	0	0	54	#N/A	#N/A	#N/A
303	NM_001030320	281039	CAST	calpastatin (CAST), transcript variant IV, mRNA.	1	44	45	2	0	2	5	0	5	8	44	52	0	0	0	0	0	0	1	0	1	2	54	#N/A	#N/A	#N/A
2488	NM_001079609	535917	CA10	carbonic anhydrase 10 (CA10), mRNA.	15	5	20	0	0	0	5	29	34	20	34	54	0	0	0	0	0	0	0	0	0	0	54	#N/A	#N/A	#N/A
2588	NM_001080341	781788	ALKBH8	alkB homolog 8, tRNA methyltransferase (ALKBH8), mRNA.	11	31	42	1	0	1	7	4	11	19	35	54	0	0	0	0	0	0	0	0	0	0	54	#N/A	2	#N/A
3907	NM_001104975	512150	LOC512150	myeloid-associated differentiation marker-like (LOC512150), mRNA.	18	23	41	0	2	2	4	7	11	22	32	54	0	0	0	0	0	0	0	0	0	0	54	#N/A	#N/A	#N/A
4383	NM_001191162	507624	MAP4K3	mitogen-activated protein kinase kinase kinase kinase 3 (MAP4K3), mRNA.	29	10	39	3	1	4	2	7	9	34	18	52	0	0	0	0	0	0	1	0	1	2	54	#N/A	#N/A	#N/A
5152	NM_001192989	537813	KCNH5	potassium voltage-gated channel subfamily H member 5 (KCNH5), mRNA.	20	7	27	0	0	0	10	15	25	30	22	52	0	0	0	0	0	0	1	0	1	2	54	#N/A	#N/A	#N/A
5465	NM_001205573	505723	LARP4B	La ribonucleoprotein 4B (LARP4B), mRNA.	7	35	42	2	1	3	8	1	9	17	37	54	0	0	0	0	0	0	0	0	0	0	54	#N/A	#N/A	#N/A
5842	NM_001206201	615161	FRMD5	FERM domain containing 5 (FRMD5), mRNA.	27	18	45	0	0	0	4	1	5	31	19	50	0	2	2	0	0	0	0	0	0	4	54	#N/A	#N/A	#N/A
6455	NM_174114	281312	MSRA	methionine sulfoxide reductase A (MSRA), mRNA; nuclear gene for mitochondrial product.	24	22	46	3	0	3	4	1	5	31	23	54	0	0	0	0	0	0	0	0	0	0	54	#N/A	#N/A	#N/A
1890	NM_001076142	539035	RNF13	ring finger protein 13 (RNF13), mRNA.	27	10	37	3	2	5	4	7	11	34	19	53	0	0	0	0	0	0	0	0	0	0	53	#N/A	#N/A	#N/A
2783	NM_001083464	532824	EEFSEC	eukaryotic elongation factor, selenocysteine-tRNA specific (EEFSEC), mRNA.	7	41	48	0	0	0	4	1	5	11	42	53	0	0	0	0	0	0	0	0	0	0	53	#N/A	#N/A	#N/A
5031	NM_001192829	534731	EPHB1	EPH receptor B1 (EPHB1), mRNA.	14	31	45	3	1	4	0	4	4	17	36	53	0	0	0	0	0	0	0	0	0	0	53	#N/A	#N/A	#N/A
6590	NM_174369	281878	ITPR2	inositol 1,4,5-trisphosphate receptor type 2 (ITPR2), mRNA.	37	8	45	0	2	2	0	6	6	37	16	53	0	0	0	0	0	0	0	0	0	0	53	#N/A	#N/A	#N/A
181	NM_001015587	513423	SLC25A21	solute carrier family 25 member 21 (SLC25A21), mRNA; nuclear gene for mitochondrial product.	6	39	45	0	0	0	0	1	1	6	40	46	0	2	2	1	0	1	0	0	0	6	52	#N/A	#N/A	SLC25A21
3600	NM_001102104	526872	ANKRD29	ankyrin repeat domain 29 (ANKRD29), mRNA.	7	27	34	5	0	5	13	0	13	25	27	52	0	0	0	0	0	0	0	0	0	0	52	-3.72706	#N/A	#N/A
4571	NM_001191537	509657	PTPRK	protein tyrosine phosphatase receptor type K (PTPRK), mRNA.	5	3	8	0	7	7	16	21	37	21	31	52	0	0	0	0	0	0	0	0	0	0	52	#N/A	#N/A	#N/A
6630	NM_174435	282001	PRKCA	protein kinase C alpha (PRKCA), mRNA.	13	31	44	1	0	1	5	2	7	19	33	52	0	0	0	0	0	0	0	0	0	0	52	#N/A	#N/A	#N/A
1378	NM_001046595	617253	PUDP	pseudouridine 5'-phosphatase (PUDP), mRNA.	23	16	39	0	2	2	4	6	10	27	24	51	0	0	0	0	0	0	0	0	0	0	51	#N/A	#N/A	#N/A
4446	NM_001191302	789150	COLGALT2	collagen beta(1-O)galactosyltransferase 2 (COLGALT2), mRNA.	31	4	35	2	5	7	3	4	7	36	13	49	1	0	1	0	0	0	0	0	0	2	51	#N/A	1	#N/A
4988	NM_001192762	404108	MYH9	myosin heavy chain 9 (MYH9), mRNA.	21	15	36	1	1	2	1	8	9	23	24	47	0	2	2	0	0	0	0	0	0	4	51	#N/A	#N/A	#N/A
5416	NM_001205487	100140763	CCDC146	coiled-coil domain containing 146 (CCDC146), mRNA.	31	10	41	0	1	1	3	6	9	34	17	51	0	0	0	0	0	0	0	0	0	0	51	#N/A	#N/A	#N/A
6608	NM_174399	281941	NCAM1	neural cell adhesion molecule 1 (NCAM1), mRNA.	28	19	47	0	1	1	0	3	3	28	23	51	0	0	0	0	0	0	0	0	0	0	51	#N/A	#N/A	#N/A
219	NM_001015668	538758	CDIN1	CDAN1 interacting nuclease 1 (CDIN1), mRNA.	9	11	20	1	0	1	21	8	29	31	19	50	0	0	0	0	0	0	0	0	0	0	50	#N/A	#N/A	#N/A
737	NM_001035407	534448	ATXN7L1	ataxin 7 like 1 (ATXN7L1), transcript variant 2, mRNA.	20	17	37	1	1	2	1	6	7	22	24	46	2	0	2	0	0	0	0	0	0	4	50	#N/A	#N/A	#N/A
3665	NM_001102207	537690	EXOC4	exocyst complex component 4 (EXOC4), mRNA.	8	40	48	1	0	1	1	0	1	10	40	50	0	0	0	0	0	0	0	0	0	0	50	#N/A	#N/A	#N/A
5087	NM_001192901	537304	OSBPL3	oxysterol binding protein like 3 (OSBPL3), mRNA.	10	33	43	1	1	2	3	2	5	14	36	50	0	0	0	0	0	0	0	0	0	0	50	#N/A	#N/A	#N/A
2027	NM_001076416	616280	EXOC6B	exocyst complex component 6B (EXOC6B), mRNA.	31	3	34	1	2	3	1	11	12	33	16	49	0	0	0	0	0	0	0	0	0	0	49	#N/A	1	#N/A
5358	NM_001205378	617120	PLD5	phospholipase D family member 5 (PLD5), mRNA.	4	27	31	0	0	0	15	3	18	19	30	49	0	0	0	0	0	0	0	0	0	0	49	#N/A	#N/A	#N/A
2131	NM_001076847	514013	APBB2	amyloid beta precursor protein binding family B member 2 (APBB2), mRNA.	25	14	39	0	1	1	3	5	8	28	20	48	0	0	0	0	0	0	0	0	0	0	48	2.09226	#N/A	#N/A
3251	NM_001099727	782935	TAFA1	TAFA chemokine like family member 1 (TAFA1), mRNA.	7	27	34	1	1	2	8	2	10	16	30	46	0	1	1	0	0	0	0	0	0	2	48	#N/A	#N/A	#N/A
4578	NM_001192019	538430	SV2C	synaptic vesicle glycoprotein 2C (SV2C), mRNA.	11	27	38	0	0	0	4	6	10	15	33	48	0	0	0	0	0	0	0	0	0	0	48	#N/A	#N/A	SV2C
4957	NM_001192721	532280	CNTLN	centlein (CNTLN), mRNA.	11	19	30	0	0	0	9	9	18	20	28	48	0	0	0	0	0	0	0	0	0	0	48	#N/A	#N/A	#N/A
5140	NM_001192973	613658	AGMO	alkylglycerol monooxygenase (AGMO), mRNA.	15	21	36	2	2	4	5	3	8	22	26	48	0	0	0	0	0	0	0	0	0	0	48	#N/A	1	#N/A
5351	NM_001205335	100299092	FEZ2	fasciculation and elongation protein zeta 2 (FEZ2), transcript variant 2, mRNA.	3	22	25	3	0	3	12	0	12	18	22	40	0	2	2	0	0	0	0	2	2	8	48	#N/A	#N/A	#N/A
5782	NM_001206114	537961	ADAMTS19	ADAM metallopeptidase with thrombospondin type 1 motif 19 (ADAMTS19), mRNA.	15	27	42	0	0	0	5	1	6	20	28	48	0	0	0	0	0	0	0	0	0	0	48	#N/A	1	#N/A
1238	NM_001046297	529043	ARHGEF10L	Rho guanine nucleotide exchange factor 10 like (ARHGEF10L), mRNA.	17	22	39	2	3	5	2	1	3	21	26	47	0	0	0	0	0	0	0	0	0	0	47	#N/A	#N/A	#N/A
1250	NM_001046318	531770	FAF1	Fas associated factor 1 (FAF1), mRNA.	7	37	44	1	0	1	2	0	2	10	37	47	0	0	0	0	0	0	0	0	0	0	47	#N/A	#N/A	#N/A
5167	NM_001193014	514134	DENND1A	DENN domain containing 1A (DENND1A), mRNA.	34	0	34	0	4	4	0	9	9	34	13	47	0	0	0	0	0	0	0	0	0	0	47	#N/A	#N/A	#N/A
2162	NM_001076895	533372	ADCK1	aarF domain containing kinase 1 (ADCK1), mRNA.	21	16	37	0	2	2	2	5	7	23	23	46	0	0	0	0	0	0	0	0	0	0	46	#N/A	#N/A	#N/A
3718	NM_001102299	616294	PARVB	parvin beta (PARVB), mRNA.	12	29	41	1	0	1	3	1	4	16	30	46	0	0	0	0	0	0	0	0	0	0	46	-2.7842	1	#N/A
5070	NM_001192878	536341	SLC26A5	solute carrier family 26 member 5 (SLC26A5), mRNA.	1	19	20	2	0	2	6	0	6	9	19	28	0	8	8	0	0	0	1	0	1	18	46	#N/A	#N/A	#N/A
5635	NM_001205886	521539	MAN2A1	mannosidase alpha class 2A member 1 (MAN2A1), mRNA.	20	13	33	2	1	3	3	7	10	25	21	46	0	0	0	0	0	0	0	0	0	0	46	#N/A	#N/A	#N/A
2433	NM_001078091	618755	FAM135B	family with sequence similarity 135 member B (FAM135B), mRNA.	20	17	37	0	1	1	4	3	7	24	21	45	0	0	0	0	0	0	0	0	0	0	45	#N/A	#N/A	#N/A
3577	NM_001102070	522828	GPC5	glypican 5 (GPC5), mRNA.	20	17	37	1	1	2	0	4	4	21	22	43	1	0	1	0	0	0	0	0	0	2	45	#N/A	#N/A	GPC5
6612	NM_174407	281957	OPCML	opioid binding protein/cell adhesion molecule like (OPCML), mRNA.	12	30	42	0	0	0	2	1	3	14	31	45	0	0	0	0	0	0	0	0	0	0	45	#N/A	#N/A	#N/A
1937	NM_001076244	540832	CSRNP3	cysteine and serine rich nuclear protein 3 (CSRNP3), mRNA.	4	26	30	3	0	3	11	0	11	18	26	44	0	0	0	0	0	0	0	0	0	0	44	#N/A	#N/A	#N/A
3557	NM_001102044	517837	MAD1L1	mitotic arrest deficient 1 like 1 (MAD1L1), mRNA.	29	4	33	0	3	3	0	8	8	29	15	44	0	0	0	0	0	0	0	0	0	0	44	#N/A	#N/A	#N/A
3912	NM_001104984	520147	LHFPL3	LHFPL tetraspan subfamily member 3 (LHFPL3), mRNA.	18	17	35	0	1	1	6	2	8	24	20	44	0	0	0	0	0	0	0	0	0	0	44	#N/A	1	#N/A
6116	NM_001206882	536281	FAT3	FAT atypical cadherin 3 (FAT3), mRNA.	22	20	42	0	0	0	0	0	0	22	20	42	0	1	1	0	0	0	0	0	0	2	44	#N/A	#N/A	FAT3
6316	NM_001354578	537963	STXBP4	syntaxin binding protein 4 (STXBP4), mRNA.	2	17	19	1	0	1	13	9	22	16	26	42	0	1	1	0	0	0	0	0	0	2	44	2.17329	#N/A	#N/A
533	NM_001034639	537713	SUCLG2	succinate-CoA ligase GDP-forming subunit beta (SUCLG2), mRNA; nuclear gene for mitochondrial product.	17	21	38	2	1	3	2	0	2	21	22	43	0	0	0	0	0	0	0	0	0	0	43	#N/A	#N/A	#N/A
1788	NM_001075968	532587	BLK	BLK proto-oncogene, Src family tyrosine kinase (BLK), mRNA.	23	12	35	2	1	3	0	1	1	25	14	39	1	1	2	0	0	0	0	0	0	4	43	#N/A	1	#N/A
4248	NM_001146219	539686	NOS1AP	nitric oxide synthase 1 adaptor protein (NOS1AP), mRNA.	11	23	34	2	0	2	3	4	7	16	27	43	0	0	0	0	0	0	0	0	0	0	43	#N/A	#N/A	#N/A
4576	NM_001191543	522215	AFF2	AF4/FMR2 family member 2 (AFF2), mRNA.	14	4	18	0	0	0	9	16	25	23	20	43	0	0	0	0	0	0	0	0	0	0	43	#N/A	#N/A	#N/A
4669	NM_001192199	539227	RAB3GAP2	RAB3 GTPase activating non-catalytic protein subunit 2 (RAB3GAP2), mRNA.	32	9	41	0	0	0	0	2	2	32	11	43	0	0	0	0	0	0	0	0	0	0	43	#N/A	#N/A	#N/A
4692	NM_001192255	510408	PLCL2	phospholipase C like 2 (PLCL2), mRNA.	17	17	34	2	0	2	3	4	7	22	21	43	0	0	0	0	0	0	0	0	0	0	43	#N/A	#N/A	#N/A
4732	NM_001192331	539914	XKR6	XK, Kell blood group complex subunit-related family, member 6 (XKR6), mRNA.	31	3	34	0	3	3	0	6	6	31	12	43	0	0	0	0	0	0	0	0	0	0	43	#N/A	#N/A	#N/A
5132	NM_001192963	613556	SLC2A13	solute carrier family 2 member 13 (SLC2A13), mRNA.	10	32	42	0	0	0	1	0	1	11	32	43	0	0	0	0	0	0	0	0	0	0	43	#N/A	#N/A	#N/A
5255	NM_001193154	617340	COL26A1	collagen type XXVI alpha 1 chain (COL26A1), mRNA.	21	19	40	0	0	0	2	1	3	23	20	43	0	0	0	0	0	0	0	0	0	0	43	#N/A	1	#N/A
5820	NM_001206169	532616	EPB41L3	erythrocyte membrane protein band 4.1 like 3 (EPB41L3), mRNA.	8	20	28	2	1	3	5	5	10	15	26	41	0	1	1	0	0	0	0	0	0	2	43	#N/A	#N/A	#N/A
15	NM_001001163	407768	ST8SIA4	ST8 alpha-N-acetyl-neuraminide alpha-2,8-sialyltransferase 4 (ST8SIA4), mRNA.	24	8	32	0	1	1	0	9	9	24	18	42	0	0	0	0	0	0	0	0	0	0	42	#N/A	#N/A	#N/A
913	NM_001038168	535346	ICA1	islet cell autoantigen 1 (ICA1), mRNA.	18	18	36	0	1	1	2	3	5	20	22	42	0	0	0	0	0	0	0	0	0	0	42	#N/A	#N/A	#N/A
3667	NM_001102211	538198	CNTN5	contactin 5 (CNTN5), mRNA.	10	7	17	0	1	1	8	14	22	18	22	40	0	0	0	0	0	0	1	0	1	2	42	#N/A	#N/A	#N/A
4930	NM_001192673	529260	NDST4	N-deacetylase and N-sulfotransferase 4 (NDST4), mRNA.	37	4	41	0	0	0	0	1	1	37	5	42	0	0	0	0	0	0	0	0	0	0	42	#N/A	#N/A	#N/A
5565	NM_001205772	513877	SRBD1	S1 RNA binding domain 1 (SRBD1), mRNA.	4	28	32	1	0	1	9	0	9	14	28	42	0	0	0	0	0	0	0	0	0	0	42	2.15282	#N/A	#N/A
5783	NM_001206115	538163	CALN1	calneuron 1 (CALN1), mRNA.	14	27	41	0	0	0	1	0	1	15	27	42	0	0	0	0	0	0	0	0	0	0	42	#N/A	#N/A	#N/A
767	NM_001035464	615264	EYA2	EYA transcriptional coactivator and phosphatase 2 (EYA2), mRNA.	16	16	32	0	0	0	2	7	9	18	23	41	0	0	0	0	0	0	0	0	0	0	41	#N/A	#N/A	#N/A
1340	NM_001046516	613724	DYNC1I1	dynein cytoplasmic 1 intermediate chain 1 (DYNC1I1), mRNA.	5	29	34	2	1	3	3	1	4	10	31	41	0	0	0	0	0	0	0	0	0	0	41	#N/A	#N/A	#N/A
1761	NM_001075914	528468	SFXN5	sideroflexin 5 (SFXN5), mRNA.	20	10	30	1	2	3	3	5	8	24	17	41	0	0	0	0	0	0	0	0	0	0	41	#N/A	#N/A	#N/A
4264	NM_001163458	513688	KIZ	kizuna centrosomal protein (KIZ), mRNA.	30	3	33	0	4	4	0	4	4	30	11	41	0	0	0	0	0	0	0	0	0	0	41	#N/A	#N/A	#N/A
4512	NM_001191426	789713	RALGPS2	Ral GEF with PH domain and SH3 binding motif 2 (RALGPS2), mRNA.	25	1	26	1	2	3	1	11	12	27	14	41	0	0	0	0	0	0	0	0	0	0	41	#N/A	#N/A	#N/A
5126	NM_001192953	613445	MREG	melanoregulin (MREG), mRNA.	5	23	28	0	0	0	7	4	11	12	27	39	0	1	1	0	0	0	0	0	0	2	41	#N/A	1	#N/A
5451	NM_001205541	504415	CHL1	cell adhesion molecule L1 like (CHL1), mRNA.	15	17	32	0	2	2	0	7	7	15	26	41	0	0	0	0	0	0	0	0	0	0	41	#N/A	#N/A	#N/A
5768	NM_001206092	536121	RSPO2	R-spondin 2 (RSPO2), mRNA.	6	11	17	0	0	0	15	9	24	21	20	41	0	0	0	0	0	0	0	0	0	0	41	#N/A	#N/A	#N/A
6864	NM_176625	337910	PAG16	pregnancy-associated glycoprotein 16 (PAG16), mRNA.	5	27	32	0	0	0	0	5	5	5	32	37	1	1	2	0	0	0	0	0	0	4	41	#N/A	#N/A	#N/A
242	NM_001024483	506231	BCAR3	BCAR3 adaptor protein, NSP family member (BCAR3), mRNA.	25	9	34	1	1	2	0	4	4	26	14	40	0	0	0	0	0	0	0	0	0	0	40	#N/A	#N/A	#N/A
2763	NM_001083420	513509	TXNDC11	thioredoxin domain containing 11 (TXNDC11), mRNA.	23	8	31	0	2	2	0	7	7	23	17	40	0	0	0	0	0	0	0	0	0	0	40	#N/A	1	#N/A
3726	NM_001102312	617606	DEPTOR	DEP domain containing MTOR interacting protein (DEPTOR), mRNA.	13	20	33	2	0	2	2	3	5	17	23	40	0	0	0	0	0	0	0	0	0	0	40	#N/A	#N/A	#N/A
3872	NM_001103313	100125233	STAU2	staufen double-stranded RNA binding protein 2 (STAU2), mRNA.	7	18	25	2	1	3	11	1	12	20	20	40	0	0	0	0	0	0	0	0	0	0	40	#N/A	#N/A	#N/A
4200	NM_001143744	100139476	GPR39	G protein-coupled receptor 39 (GPR39), mRNA.	10	0	10	0	6	6	1	23	24	11	29	40	0	0	0	0	0	0	0	0	0	0	40	#N/A	#N/A	#N/A
4243	NM_001145232	515972	TBL1X	transducin beta like 1 X-linked (TBL1X), mRNA.	15	17	32	2	1	3	2	3	5	19	21	40	0	0	0	0	0	0	0	0	0	0	40	#N/A	1	#N/A
4901	NM_001192626	526363	GRIK4	glutamate ionotropic receptor kainate type subunit 4 (GRIK4), mRNA.	13	19	32	3	1	4	4	0	4	20	20	40	0	0	0	0	0	0	0	0	0	0	40	#N/A	#N/A	#N/A
5059	NM_001192861	535597	RORA	RAR related orphan receptor A (RORA), mRNA.	13	24	37	0	0	0	3	0	3	16	24	40	0	0	0	0	0	0	0	0	0	0	40	2.60664	#N/A	#N/A
5217	NM_001193100	616166	RALGPS1	Ral GEF with PH domain and SH3 binding motif 1 (RALGPS1), mRNA.	14	22	36	1	0	1	1	2	3	16	24	40	0	0	0	0	0	0	0	0	0	0	40	#N/A	#N/A	#N/A
6059	NM_001206751	519644	CACNA2D3	calcium voltage-gated channel auxiliary subunit alpha2delta 3 (CACNA2D3), mRNA.	15	25	40	0	0	0	0	0	0	15	25	40	0	0	0	0	0	0	0	0	0	0	40	#N/A	#N/A	#N/A
6060	NM_001206753	519961	ATG2B	autophagy related 2B (ATG2B), mRNA.	26	1	27	0	1	1	1	11	12	27	13	40	0	0	0	0	0	0	0	0	0	0	40	1.92758	#N/A	#N/A
584	NM_001034762	614571	NXPH1	neurexophilin 1 (NXPH1), mRNA.	5	23	28	1	0	1	3	7	10	9	30	39	0	0	0	0	0	0	0	0	0	0	39	#N/A	#N/A	#N/A
1540	NM_001075441	510256	SVOP	SV2 related protein (SVOP), mRNA.	8	24	32	0	0	0	5	2	7	13	26	39	0	0	0	0	0	0	0	0	0	0	39	#N/A	#N/A	#N/A
1930	NM_001076232	540667	MARCHF8	membrane associated ring-CH-type finger 8 (MARCHF8), mRNA.	23	13	36	0	1	1	0	2	2	23	16	39	0	0	0	0	0	0	0	0	0	0	39	#N/A	#N/A	#N/A
2103	NM_001076805	505390	FARS2	phenylalanyl-tRNA synthetase 2, mitochondrial (FARS2), mRNA; nuclear gene for mitochondrial product.	28	6	34	0	2	2	0	3	3	28	11	39	0	0	0	0	0	0	0	0	0	0	39	#N/A	#N/A	#N/A
2962	NM_001098065	528315	SH3RF1	SH3 domain containing ring finger 1 (SH3RF1), mRNA.	22	7	29	1	4	5	0	5	5	23	16	39	0	0	0	0	0	0	0	0	0	0	39	#N/A	#N/A	#N/A
3371	NM_001101160	534678	TMEM163	transmembrane protein 163 (TMEM163), mRNA.	11	7	18	1	0	1	14	4	18	26	11	37	1	0	1	0	0	0	0	0	0	2	39	#N/A	#N/A	#N/A
4833	NM_001192520	520189	LGR5	leucine rich repeat containing G protein-coupled receptor 5 (LGR5), mRNA.	2	33	35	0	0	0	4	0	4	6	33	39	0	0	0	0	0	0	0	0	0	0	39	#N/A	#N/A	#N/A
5041	NM_001192841	535017	ADCY8	adenylate cyclase 8 (ADCY8), mRNA.	2	29	31	4	0	4	4	0	4	10	29	39	0	0	0	0	0	0	0	0	0	0	39	#N/A	1	#N/A
5549	NM_001205745	539986	BTBD11	BTB domain containing 11 (BTBD11), mRNA.	9	23	32	0	0	0	1	6	7	10	29	39	0	0	0	0	0	0	0	0	0	0	39	#N/A	#N/A	#N/A
6097	NM_001206832	615488	FGF14	fibroblast growth factor 14 (FGF14), mRNA.	12	18	30	1	3	4	2	3	5	15	24	39	0	0	0	0	0	0	0	0	0	0	39	#N/A	#N/A	#N/A
6539	NM_174270	281685	CHRM3	cholinergic receptor muscarinic 3 (CHRM3), mRNA.	4	7	11	0	0	0	19	9	28	23	16	39	0	0	0	0	0	0	0	0	0	0	39	#N/A	#N/A	#N/A
2892	NM_001083776	616912	NALF1	NALCN channel auxiliary factor 1 (NALF1), mRNA.	7	27	34	1	0	1	3	0	3	11	27	38	0	0	0	0	0	0	0	0	0	0	38	#N/A	#N/A	#N/A
3702	NM_001102274	614152	BABAM2	BRISC and BRCA1 A complex member 2 (BABAM2), mRNA.	8	5	13	0	0	0	6	19	25	14	24	38	0	0	0	0	0	0	0	0	0	0	38	#N/A	#N/A	#N/A
4600	NM_001192067	505622	GALNT17	polypeptide N-acetylgalactosaminyltransferase 17 (GALNT17), mRNA.	13	19	32	0	0	0	0	6	6	13	25	38	0	0	0	0	0	0	0	0	0	0	38	#N/A	#N/A	#N/A
4794	NM_001192457	516921	EML6	EMAP like 6 (EML6), mRNA.	15	17	32	0	0	0	1	5	6	16	22	38	0	0	0	0	0	0	0	0	0	0	38	#N/A	#N/A	#N/A
5228	NM_001193115	616537	RAB6A	RAB6A, member RAS oncogene family (RAB6A), mRNA.	26	3	29	0	1	1	0	8	8	26	12	38	0	0	0	0	0	0	0	0	0	0	38	#N/A	2	#N/A
5440	NM_001205522	538219	ARHGAP26	Rho GTPase activating protein 26 (ARHGAP26), mRNA.	15	20	35	1	0	1	0	2	2	16	22	38	0	0	0	0	0	0	0	0	0	0	38	#N/A	#N/A	#N/A
5705	NM_001206000	510272	PRRC1	proline rich coiled-coil 1 (PRRC1), mRNA.	29	1	30	0	1	1	0	7	7	29	9	38	0	0	0	0	0	0	0	0	0	0	38	1.44111	#N/A	PRRC1
6220	NM_001278561	534358	UTRN	utrophin (UTRN), mRNA.	20	16	36	0	0	0	0	0	0	20	16	36	1	0	1	0	0	0	0	0	0	2	38	#N/A	#N/A	#N/A
6290	NM_001314032	525636	RCAN2	regulator of calcineurin 2 (RCAN2), transcript variant 1, mRNA.	1	30	31	2	1	3	4	0	4	7	31	38	0	0	0	0	0	0	0	0	0	0	38	5.53814	#N/A	RCAN2
3627	NM_001102145	532641	ZFAND3	zinc finger AN1-type containing 3 (ZFAND3), mRNA.	9	26	35	1	0	1	0	1	1	10	27	37	0	0	0	0	0	0	0	0	0	0	37	#N/A	#N/A	#N/A
3671	NM_001102217	538606	PPP1R12A	protein phosphatase 1 regulatory subunit 12A (PPP1R12A), mRNA.	22	10	32	1	0	1	3	1	4	26	11	37	0	0	0	0	0	0	0	0	0	0	37	#N/A	1	#N/A
3997	NM_001105436	614716	AUH	AU RNA binding methylglutaconyl-CoA hydratase (AUH), mRNA; nuclear gene for mitochondrial product.	23	1	24	0	2	2	0	9	9	23	12	35	1	0	1	0	0	0	0	0	0	2	37	#N/A	#N/A	#N/A
4440	NM_001191282	614787	NIBAN1	niban apoptosis regulator 1 (NIBAN1), mRNA.	20	4	24	0	2	2	1	10	11	21	16	37	0	0	0	0	0	0	0	0	0	0	37	#N/A	#N/A	#N/A
4928	NM_001192669	528870	NAV3	neuron navigator 3 (NAV3), mRNA.	18	14	32	0	0	0	2	3	5	20	17	37	0	0	0	0	0	0	0	0	0	0	37	#N/A	#N/A	#N/A
5197	NM_001193063	615226	GRIK2	glutamate ionotropic receptor kainate type subunit 2 (GRIK2), mRNA.	19	12	31	0	1	1	3	2	5	22	15	37	0	0	0	0	0	0	0	0	0	0	37	#N/A	#N/A	#N/A
5362	NM_001205389	519552	CHM	CHM Rab escort protein (CHM), mRNA.	16	0	16	0	3	3	0	18	18	16	21	37	0	0	0	0	0	0	0	0	0	0	37	#N/A	#N/A	#N/A
6198	NM_001256556	514194	CP	ceruloplasmin (CP), mRNA.	7	15	22	3	0	3	9	1	10	19	16	35	0	0	0	0	0	0	0	1	1	2	37	#N/A	#N/A	#N/A
6385	NM_173971	280957	VIT	vitrin (VIT), mRNA.	3	29	32	0	1	1	2	2	4	5	32	37	0	0	0	0	0	0	0	0	0	0	37	#N/A	#N/A	#N/A
6956	NM_194465	281918	IRAG1	inositol 1,4,5-triphosphate receptor associated 1 (IRAG1), transcript variant 2, mRNA.	12	14	26	1	1	2	2	3	5	15	18	33	2	0	2	0	0	0	0	0	0	4	37	#N/A	#N/A	#N/A
228	NM_001017937	507837	BAIAP2	BAR/IMD domain containing adaptor protein 2 (BAIAP2), mRNA.	6	23	29	3	0	3	0	0	0	9	23	32	0	2	2	0	0	0	0	0	0	4	36	#N/A	#N/A	#N/A
2123	NM_001076837	512080	CDH18	cadherin 18 (CDH18), mRNA.	6	23	29	2	0	2	5	0	5	13	23	36	0	0	0	0	0	0	0	0	0	0	36	#N/A	1	#N/A
2231	NM_001077016	767944	DPH6	diphthamine biosynthesis 6 (DPH6), mRNA.	15	1	16	0	0	0	3	11	14	18	12	30	1	1	2	0	0	0	1	0	1	6	36	#N/A	#N/A	#N/A
5088	NM_001192902	537312	RAPGEF4	Rap guanine nucleotide exchange factor 4 (RAPGEF4), mRNA.	1	7	8	0	0	0	24	4	28	25	11	36	0	0	0	0	0	0	0	0	0	0	36	#N/A	#N/A	#N/A
6435	NM_174072	281203	GNG2	G protein subunit gamma 2 (GNG2), mRNA.	11	18	29	0	0	0	5	2	7	16	20	36	0	0	0	0	0	0	0	0	0	0	36	#N/A	#N/A	#N/A
6819	NM_174817	287026	PLCB1	phospholipase C beta 1 (PLCB1), mRNA.	5	9	14	0	0	0	9	13	22	14	22	36	0	0	0	0	0	0	0	0	0	0	36	#N/A	#N/A	#N/A
6853	NM_175805	327686	FNTB	farnesyltransferase, CAAX box, beta (FNTB), mRNA.	0	19	19	1	0	1	14	2	16	15	21	36	0	0	0	0	0	0	0	0	0	0	36	#N/A	#N/A	#N/A
6982	NM_205814	404177	KCNN2	potassium calcium-activated channel subfamily N member 2 (KCNN2), transcript variant 2, mRNA.	1	16	17	1	0	1	16	2	18	18	18	36	0	0	0	0	0	0	0	0	0	0	36	#N/A	#N/A	#N/A
4579	NM_001192023	504408	RPS6KA5	ribosomal protein S6 kinase A5 (RPS6KA5), mRNA.	28	4	32	0	1	1	0	2	2	28	7	35	0	0	0	0	0	0	0	0	0	0	35	#N/A	#N/A	#N/A
4838	NM_001192527	520720	UHRF1BP1L	UHRF1 binding protein 1 like (UHRF1BP1L), mRNA.	27	2	29	0	1	1	0	5	5	27	8	35	0	0	0	0	0	0	0	0	0	0	35	#N/A	#N/A	#N/A
6197	NM_001256555	100336965	TENM1	teneurin transmembrane protein 1 (TENM1), mRNA.	10	21	31	0	0	0	3	1	4	13	22	35	0	0	0	0	0	0	0	0	0	0	35	#N/A	#N/A	#N/A
6805	NM_174787	286852	PPP3CA	protein phosphatase 3 catalytic subunit alpha (PPP3CA), mRNA.	21	7	28	2	1	3	2	2	4	25	10	35	0	0	0	0	0	0	0	0	0	0	35	#N/A	#N/A	#N/A
278	NM_001024563	535990	KCNB2	potassium voltage-gated channel subfamily B member 2 (KCNB2), mRNA.	5	26	31	2	0	2	0	1	1	7	27	34	0	0	0	0	0	0	0	0	0	0	34	#N/A	#N/A	#N/A
1716	NM_001075829	522371	TSPAN15	tetraspanin 15 (TSPAN15), mRNA.	0	22	22	3	0	3	7	0	7	10	22	32	0	0	0	0	0	0	1	0	1	2	34	#N/A	#N/A	#N/A
1899	NM_001076160	539417	C1GALT1	core 1 synthase, glycoprotein-N-acetylgalactosamine 3-beta-galactosyltransferase 1 (C1GALT1), mRNA.	0	28	28	1	0	1	5	0	5	6	28	34	0	0	0	0	0	0	0	0	0	0	34	#N/A	#N/A	#N/A
2194	NM_001076943	616397	ZMAT4	zinc finger matrin-type 4 (ZMAT4), mRNA.	4	4	8	0	0	0	12	14	26	16	18	34	0	0	0	0	0	0	0	0	0	0	34	#N/A	#N/A	#N/A
2759	NM_001083414	512457	WWP2	WW domain containing E3 ubiquitin protein ligase 2 (WWP2), mRNA.	10	17	27	0	1	1	2	4	6	12	22	34	0	0	0	0	0	0	0	0	0	0	34	#N/A	#N/A	#N/A
3478	NM_001101888	507820	SENP7	SUMO specific peptidase 7 (SENP7), mRNA.	33	0	33	0	0	0	0	1	1	33	1	34	0	0	0	0	0	0	0	0	0	0	34	#N/A	#N/A	#N/A
3632	NM_001102153	533177	SCARB2	scavenger receptor class B member 2 (SCARB2), mRNA.	1	10	11	4	0	4	16	1	17	21	11	32	0	0	0	1	0	1	0	0	0	2	34	-2.6286	#N/A	#N/A
3709	NM_001102281	614548	GADL1	glutamate decarboxylase like 1 (GADL1), mRNA.	12	13	25	2	0	2	3	4	7	17	17	34	0	0	0	0	0	0	0	0	0	0	34	#N/A	#N/A	#N/A
3811	NM_001103091	510559	LTBP1	latent transforming growth factor beta binding protein 1 (LTBP1), mRNA.	26	8	34	0	0	0	0	0	0	26	8	34	0	0	0	0	0	0	0	0	0	0	34	#N/A	2	#N/A
3923	NM_001105008	618133	SUPT3H	SPT3 homolog, SAGA and STAGA complex component (SUPT3H), mRNA.	18	11	29	0	1	1	2	2	4	20	14	34	0	0	0	0	0	0	0	0	0	0	34	#N/A	#N/A	SUPT3H
4175	NM_001128498	505504	BTBD9	BTB domain containing 9 (BTBD9), mRNA.	4	29	33	0	0	0	1	0	1	5	29	34	0	0	0	0	0	0	0	0	0	0	34	#N/A	#N/A	#N/A
5096	NM_001192913	537652	TRPS1	transcriptional repressor GATA binding 1 (TRPS1), mRNA.	9	18	27	1	1	2	5	0	5	15	19	34	0	0	0	0	0	0	0	0	0	0	34	#N/A	1	#N/A
6512	NM_174224	281590	ACACA	acetyl-CoA carboxylase alpha (ACACA), mRNA.	13	4	17	0	0	0	6	11	17	19	15	34	0	0	0	0	0	0	0	0	0	0	34	3.12094	#N/A	ACACA
6606	NM_174394	281935	MYO10	myosin X (MYO10), mRNA.	12	18	30	0	0	0	0	0	0	12	18	30	0	2	2	0	0	0	0	0	0	4	34	2.09536	#N/A	#N/A
6706	NM_174587	282325	PRKCB	protein kinase C beta (PRKCB), mRNA.	8	12	20	1	1	2	5	7	12	14	20	34	0	0	0	0	0	0	0	0	0	0	34	#N/A	#N/A	#N/A
1725	NM_001075842	523432	WDFY2	WD repeat and FYVE domain containing 2 (WDFY2), mRNA.	16	9	25	0	3	3	2	3	5	18	15	33	0	0	0	0	0	0	0	0	0	0	33	#N/A	#N/A	#N/A
2024	NM_001076406	616050	SMYD3	SET and MYND domain containing 3 (SMYD3), mRNA.	17	13	30	0	1	1	2	0	2	19	14	33	0	0	0	0	0	0	0	0	0	0	33	#N/A	#N/A	#N/A
4633	NM_001192130	507056	RPTOR	regulatory associated protein of MTOR complex 1 (RPTOR), mRNA.	2	27	29	1	0	1	3	0	3	6	27	33	0	0	0	0	0	0	0	0	0	0	33	#N/A	#N/A	#N/A
6732	NM_174632	282410	CACNA1B	calcium voltage-gated channel subunit alpha1 B (CACNA1B), mRNA.	19	12	31	0	0	0	2	0	2	21	12	33	0	0	0	0	0	0	0	0	0	0	33	#N/A	1	#N/A
687	NM_001035309	515496	SLC25A48	solute carrier family 25 member 48 (SLC25A48), mRNA.	10	6	16	0	1	1	0	1	1	10	8	18	1	0	1	1	0	1	5	0	5	14	32	#N/A	#N/A	#N/A
845	NM_001038037	505437	C15H11orf49	chromosome 15 C11orf49 homolog (C15H11orf49), mRNA.	18	7	25	0	1	1	2	4	6	20	12	32	0	0	0	0	0	0	0	0	0	0	32	#N/A	#N/A	#N/A
1037	NM_001040601	617534	RSU1	Ras suppressor protein 1 (RSU1), mRNA.	20	8	28	1	0	1	2	1	3	23	9	32	0	0	0	0	0	0	0	0	0	0	32	#N/A	#N/A	#N/A
2118	NM_001076830	510704	ARHGAP10	Rho GTPase activating protein 10 (ARHGAP10), mRNA.	11	18	29	0	0	0	3	0	3	14	18	32	0	0	0	0	0	0	0	0	0	0	32	#N/A	#N/A	#N/A
3195	NM_001099156	616372	TMEM41B	transmembrane protein 41B (TMEM41B), mRNA.	22	3	25	0	0	0	3	4	7	25	7	32	0	0	0	0	0	0	0	0	0	0	32	#N/A	1	#N/A
3975	NM_001105388	522311	ITK	IL2 inducible T cell kinase (ITK), mRNA.	16	5	21	0	1	1	3	7	10	19	13	32	0	0	0	0	0	0	0	0	0	0	32	#N/A	#N/A	#N/A
4322	NM_001166572	407151	TRPC6	transient receptor potential cation channel subfamily C member 6 (TRPC6), mRNA.	3	10	13	0	1	1	7	11	18	10	22	32	0	0	0	0	0	0	0	0	0	0	32	#N/A	#N/A	#N/A
4364	NM_001191123	353113	CACNA1E	calcium voltage-gated channel subunit alpha1 E (CACNA1E), mRNA.	10	20	30	1	0	1	0	1	1	11	21	32	0	0	0	0	0	0	0	0	0	0	32	#N/A	#N/A	#N/A
5077	NM_001192887	536811	JPH1	junctophilin 1 (JPH1), mRNA.	15	10	25	1	0	1	4	2	6	20	12	32	0	0	0	0	0	0	0	0	0	0	32	#N/A	#N/A	#N/A
5193	NM_001193055	614976	KLHL1	kelch like family member 1 (KLHL1), mRNA.	3	0	3	1	6	7	8	14	22	12	20	32	0	0	0	0	0	0	0	0	0	0	32	#N/A	#N/A	#N/A
5706	NM_001206003	532553	GRIK3	glutamate ionotropic receptor kainate type subunit 3 (GRIK3), mRNA.	19	9	28	0	0	0	0	4	4	19	13	32	0	0	0	0	0	0	0	0	0	0	32	#N/A	#N/A	#N/A
5746	NM_001206063	534778	RNLS	renalase, FAD dependent amine oxidase (RNLS), mRNA.	11	13	24	0	0	0	5	3	8	16	16	32	0	0	0	0	0	0	0	0	0	0	32	#N/A	#N/A	#N/A
6865	NM_176632	337925	SLC8A1	solute carrier family 8 member A1 (SLC8A1), mRNA.	14	13	27	0	0	0	1	4	5	15	17	32	0	0	0	0	0	0	0	0	0	0	32	1.79685	#N/A	#N/A
6907	NM_177519	282241	GALNT1	polypeptide N-acetylgalactosaminyltransferase 1 (GALNT1), mRNA.	15	4	19	0	3	3	0	8	8	15	15	30	1	0	1	0	0	0	0	0	0	2	32	#N/A	#N/A	#N/A
217	NM_001015662	536337	PTPRR	protein tyrosine phosphatase receptor type R (PTPRR), transcript variant 1, mRNA.	13	14	27	0	0	0	3	1	4	16	15	31	0	0	0	0	0	0	0	0	0	0	31	#N/A	#N/A	#N/A
2018	NM_001076389	615662	CFAP299	cilia and flagella associated protein 299 (CFAP299), mRNA.	1	5	6	6	2	8	13	4	17	20	11	31	0	0	0	0	0	0	0	0	0	0	31	#N/A	#N/A	#N/A
2999	NM_001098123	541056	GRM3	glutamate metabotropic receptor 3 (GRM3), mRNA.	7	6	13	0	0	0	7	11	18	14	17	31	0	0	0	0	0	0	0	0	0	0	31	#N/A	#N/A	#N/A
3082	NM_001098952	512846	UEVLD	UEV and lactate/malate dehyrogenase domains (UEVLD), mRNA.	13	5	18	0	2	2	1	6	7	14	13	27	2	0	2	0	0	0	0	0	0	4	31	#N/A	#N/A	#N/A
3740	NM_001102336	785165	LUZP2	leucine zipper protein 2 (LUZP2), mRNA.	5	17	22	1	0	1	4	4	8	10	21	31	0	0	0	0	0	0	0	0	0	0	31	#N/A	#N/A	LUZP2
3803	NM_001102546	100124505	PDE4B	phosphodiesterase 4B (PDE4B), mRNA.	16	12	28	0	0	0	0	3	3	16	15	31	0	0	0	0	0	0	0	0	0	0	31	3.00885	#N/A	#N/A
3988	NM_001105411	534801	GFRA1	GDNF family receptor alpha 1 (GFRA1), mRNA.	4	5	9	0	0	0	13	9	22	17	14	31	0	0	0	0	0	0	0	0	0	0	31	#N/A	#N/A	#N/A
4285	NM_001164418	790891	DNAH9	dynein axonemal heavy chain 9 (DNAH9), mRNA.	6	4	10	1	2	3	3	15	18	10	21	31	0	0	0	0	0	0	0	0	0	0	31	#N/A	#N/A	#N/A
4347	NM_001170532	536981	NOL4	nucleolar protein 4 (NOL4), transcript variant 1, mRNA.	5	24	29	1	0	1	1	0	1	7	24	31	0	0	0	0	0	0	0	0	0	0	31	#N/A	#N/A	#N/A
4438	NM_001191279	537873	PLCL1	phospholipase C like 1 (inactive) (PLCL1), mRNA.	3	5	8	0	1	1	10	12	22	13	18	31	0	0	0	0	0	0	0	0	0	0	31	3.02276	#N/A	PLCL1
4455	NM_001191325	510296	LMX1A	LIM homeobox transcription factor 1 alpha (LMX1A), mRNA.	18	3	21	1	2	3	1	6	7	20	11	31	0	0	0	0	0	0	0	0	0	0	31	#N/A	#N/A	#N/A
4511	NM_001191425	100296635	USH2A	usherin (USH2A), mRNA.	12	10	22	0	2	2	0	7	7	12	19	31	0	0	0	0	0	0	0	0	0	0	31	#N/A	#N/A	#N/A
4939	NM_001192686	529905	KLHL25	kelch like family member 25 (KLHL25), mRNA.	3	13	16	1	0	1	4	0	4	8	13	21	0	3	3	0	0	0	2	0	2	10	31	#N/A	#N/A	#N/A
6135	NM_001206980	531757	C8H9orf3	chromosome 8 open reading frame, human C9orf3 (C8H9orf3), mRNA.	11	14	25	1	2	3	1	2	3	13	18	31	0	0	0	0	0	0	0	0	0	0	31	#N/A	#N/A	#N/A
1280	NM_001046371	534169	SPATA6	spermatogenesis associated 6 (SPATA6), mRNA.	16	11	27	1	0	1	0	2	2	17	13	30	0	0	0	0	0	0	0	0	0	0	30	#N/A	#N/A	#N/A
1513	NM_001075394	509206	STS	steroid sulfatase (STS), mRNA.	14	10	24	0	0	0	4	2	6	18	12	30	0	0	0	0	0	0	0	0	0	0	30	#N/A	#N/A	#N/A
1848	NM_001076066	783572	ADK	adenosine kinase (ADK), mRNA.	11	16	27	0	1	1	0	2	2	11	19	30	0	0	0	0	0	0	0	0	0	0	30	#N/A	2	#N/A
1926	NM_001076228	540575	PTPRG	protein tyrosine phosphatase receptor type G (PTPRG), mRNA.	12	18	30	0	0	0	0	0	0	12	18	30	0	0	0	0	0	0	0	0	0	0	30	#N/A	#N/A	#N/A
2170	NM_001076907	534712	RB1	RB transcriptional corepressor 1 (RB1), mRNA.	17	7	24	0	0	0	1	5	6	18	12	30	0	0	0	0	0	0	0	0	0	0	30	#N/A	#N/A	#N/A
2347	NM_001077928	515731	PLXDC2	plexin domain containing 2 (PLXDC2), mRNA.	12	17	29	0	0	0	1	0	1	13	17	30	0	0	0	0	0	0	0	0	0	0	30	#N/A	#N/A	#N/A
2920	NM_001097985	505238	RALB	RAS like proto-oncogene B (RALB), mRNA.	4	15	19	5	1	6	2	3	5	11	19	30	0	0	0	0	0	0	0	0	0	0	30	#N/A	#N/A	#N/A
3187	NM_001099139	614796	TMEM260	transmembrane protein 260 (TMEM260), mRNA.	18	3	21	0	2	2	0	7	7	18	12	30	0	0	0	0	0	0	0	0	0	0	30	#N/A	#N/A	#N/A
4053	NM_001109767	506569	TTC3	tetratricopeptide repeat domain 3 (TTC3), mRNA.	0	25	25	2	0	2	3	0	3	5	25	30	0	0	0	0	0	0	0	0	0	0	30	#N/A	#N/A	#N/A
5819	NM_001206168	535163	MDN1	midasin AAA ATPase 1 (MDN1), mRNA.	20	0	20	0	4	4	0	6	6	20	10	30	0	0	0	0	0	0	0	0	0	0	30	#N/A	#N/A	#N/A
6927	NM_181013	281278	ADGRL2	adhesion G protein-coupled receptor L2 (ADGRL2), mRNA.	11	11	22	2	0	2	3	3	6	16	14	30	0	0	0	0	0	0	0	0	0	0	30	#N/A	#N/A	#N/A
6962	NM_203362	541099	MTPN	myotrophin (MTPN), mRNA.	1	27	28	0	0	0	2	0	2	3	27	30	0	0	0	0	0	0	0	0	0	0	30	#N/A	#N/A	#N/A
1364	NM_001046563	615873	MRPL48	mitochondrial ribosomal protein L48 (MRPL48), mRNA; nuclear gene for mitochondrial product.	12	2	14	0	1	1	0	8	8	12	11	23	0	0	0	0	1	1	0	2	2	6	29	#N/A	#N/A	#N/A
1813	NM_001076014	534118	FIG4	FIG4 phosphoinositide 5-phosphatase (FIG4), mRNA.	5	20	25	0	0	0	4	0	4	9	20	29	0	0	0	0	0	0	0	0	0	0	29	#N/A	#N/A	#N/A
2615	NM_001080912	534183	LHPP	phospholysine phosphohistidine inorganic pyrophosphate phosphatase (LHPP), mRNA.	26	0	26	0	0	0	0	3	3	26	3	29	0	0	0	0	0	0	0	0	0	0	29	#N/A	#N/A	#N/A
3623	NM_001102140	531710	BRINP3	BMP/retinoic acid inducible neural specific 3 (BRINP3), mRNA.	2	21	23	0	1	1	5	0	5	7	22	29	0	0	0	0	0	0	0	0	0	0	29	#N/A	#N/A	#N/A
3772	NM_001102499	516087	SCARA5	scavenger receptor class A member 5 (SCARA5), mRNA.	3	15	18	1	0	1	10	0	10	14	15	29	0	0	0	0	0	0	0	0	0	0	29	#N/A	#N/A	#N/A
4483	NM_001191364	540675	KALRN	kalirin, RhoGEF kinase (KALRN), mRNA.	20	9	29	0	0	0	0	0	0	20	9	29	0	0	0	0	0	0	0	0	0	0	29	#N/A	#N/A	KALRN
4990	NM_001192768	540688	PBX1	PBX homeobox 1 (PBX1), mRNA.	11	13	24	0	0	0	4	1	5	15	14	29	0	0	0	0	0	0	0	0	0	0	29	2.9799	#N/A	#N/A
5008	NM_001192794	534011	FGGY	FGGY carbohydrate kinase domain containing (FGGY), mRNA.	17	11	28	0	1	1	0	0	0	17	12	29	0	0	0	0	0	0	0	0	0	0	29	2.19763	#N/A	#N/A
5615	NM_001205850	518833	CYFIP2	cytoplasmic FMR1 interacting protein 2 (CYFIP2), mRNA.	11	7	18	0	2	2	8	1	9	19	10	29	0	0	0	0	0	0	0	0	0	0	29	1.83902	#N/A	#N/A
6080	NM_001206795	533057	IARS2	isoleucyl-tRNA synthetase 2, mitochondrial (IARS2), mRNA; nuclear gene for mitochondrial product.	9	15	24	0	0	0	3	2	5	12	17	29	0	0	0	0	0	0	0	0	0	0	29	#N/A	#N/A	#N/A
6106	NM_001206863	782831	FSTL5	follistatin like 5 (FSTL5), mRNA.	13	15	28	0	0	0	0	1	1	13	16	29	0	0	0	0	0	0	0	0	0	0	29	#N/A	#N/A	#N/A
6601	NM_174387	281909	MANBA	mannosidase beta (MANBA), mRNA.	17	5	22	0	1	1	0	6	6	17	12	29	0	0	0	0	0	0	0	0	0	0	29	#N/A	#N/A	#N/A
436	NM_001034440	513254	PEBP4	phosphatidylethanolamine binding protein 4 (PEBP4), mRNA.	14	4	18	0	1	1	1	6	7	15	11	26	0	0	0	0	0	0	0	1	1	2	28	#N/A	#N/A	#N/A
488	NM_001034559	527433	KIFBP	kinesin family binding protein (KIFBP), mRNA.	2	13	15	3	0	3	10	0	10	15	13	28	0	0	0	0	0	0	0	0	0	0	28	#N/A	#N/A	#N/A
1081	NM_001045955	507065	RBM19	RNA binding motif protein 19 (RBM19), mRNA.	13	12	25	0	0	0	2	1	3	15	13	28	0	0	0	0	0	0	0	0	0	0	28	#N/A	#N/A	#N/A
1499	NM_001075354	508373	RAB2A	RAB2A, member RAS oncogene family (RAB2A), mRNA.	16	3	19	1	0	1	3	3	6	20	6	26	0	0	0	0	0	0	1	0	1	2	28	1.14821	#N/A	#N/A
2896	NM_001083783	618245	ACBD6	acyl-CoA binding domain containing 6 (ACBD6), mRNA.	7	17	24	0	1	1	1	2	3	8	20	28	0	0	0	0	0	0	0	0	0	0	28	#N/A	#N/A	#N/A
3317	NM_001101060	507632	YES1	YES proto-oncogene 1, Src family tyrosine kinase (YES1), mRNA.	4	12	16	2	0	2	8	2	10	14	14	28	0	0	0	0	0	0	0	0	0	0	28	2.46035	#N/A	#N/A
3473	NM_001101882	507329	INPP5D	inositol polyphosphate-5-phosphatase D (INPP5D), mRNA.	11	11	22	0	1	1	1	4	5	12	16	28	0	0	0	0	0	0	0	0	0	0	28	#N/A	#N/A	INPP5D
3698	NM_001102266	613606	AKAP7	A-kinase anchoring protein 7 (AKAP7), mRNA.	7	12	19	7	0	7	2	0	2	16	12	28	0	0	0	0	0	0	0	0	0	0	28	#N/A	#N/A	AKAP7
4535	NM_001191466	538404	MYOM1	myomesin 1 (MYOM1), mRNA.	13	8	21	0	2	2	1	4	5	14	14	28	0	0	0	0	0	0	0	0	0	0	28	#N/A	#N/A	#N/A
4603	NM_001192071	505771	PEX1	peroxisomal biogenesis factor 1 (PEX1), mRNA.	16	7	23	0	1	1	1	3	4	17	11	28	0	0	0	0	0	0	0	0	0	0	28	#N/A	#N/A	#N/A
5428	NM_001205500	616640	TTC7A	tetratricopeptide repeat domain 7A (TTC7A), mRNA.	17	7	24	0	0	0	0	4	4	17	11	28	0	0	0	0	0	0	0	0	0	0	28	-1.33261	#N/A	#N/A
5730	NM_001206040	540885	IBTK	inhibitor of Bruton tyrosine kinase (IBTK), mRNA.	13	1	14	0	2	2	2	8	10	15	11	26	0	1	1	0	0	0	0	0	0	2	28	#N/A	#N/A	#N/A
5995	NM_001206586	540504	SYNE2	spectrin repeat containing nuclear envelope protein 2 (SYNE2), mRNA.	6	3	9	0	0	0	6	13	19	12	16	28	0	0	0	0	0	0	0	0	0	0	28	2.02095	#N/A	#N/A
6278	NM_001304775	378474	NOX4	NADPH oxidase 4 (NOX4), mRNA.	15	8	23	0	1	1	1	3	4	16	12	28	0	0	0	0	0	0	0	0	0	0	28	#N/A	#N/A	#N/A
213	NM_001015656	534611	NME7	NME/NM23 family member 7 (NME7), mRNA.	11	4	15	0	3	3	0	9	9	11	16	27	0	0	0	0	0	0	0	0	0	0	27	#N/A	#N/A	#N/A
600	NM_001035009	504499	NDRG1	N-myc downstream regulated 1 (NDRG1), mRNA.	5	14	19	2	0	2	2	0	2	9	14	23	2	0	2	0	0	0	0	0	0	4	27	2.18561	#N/A	#N/A
650	NM_001035092	510495	LMBRD1	LMBR1 domain containing 1 (LMBRD1), mRNA.	4	15	19	2	0	2	1	1	2	7	16	23	2	0	2	0	0	0	0	0	0	4	27	#N/A	#N/A	#N/A
1211	NM_001046233	517728	NAPB	NSF attachment protein beta (NAPB), mRNA.	2	20	22	2	0	2	3	0	3	7	20	27	0	0	0	0	0	0	0	0	0	0	27	#N/A	#N/A	#N/A
1295	NM_001046405	535332	METTL6	methyltransferase like 6 (METTL6), mRNA.	13	2	15	1	3	4	0	8	8	14	13	27	0	0	0	0	0	0	0	0	0	0	27	#N/A	#N/A	#N/A
1382	NM_001046606	338100	RAB3C	RAB3C, member RAS oncogene family (RAB3C), mRNA.	17	2	19	0	2	2	0	6	6	17	10	27	0	0	0	0	0	0	0	0	0	0	27	#N/A	#N/A	#N/A
1549	NM_001075468	510816	DDX1	DEAD-box helicase 1 (DDX1), mRNA.	9	8	17	0	1	1	2	7	9	11	16	27	0	0	0	0	0	0	0	0	0	0	27	#N/A	#N/A	#N/A
1863	NM_001076090	537297	DOCK11	dedicator of cytokinesis 11 (DOCK11), mRNA.	1	5	6	0	0	0	11	10	21	12	15	27	0	0	0	0	0	0	0	0	0	0	27	#N/A	#N/A	#N/A
2126	NM_001076840	512450	SH3GL2	SH3 domain containing GRB2 like 2, endophilin A1 (SH3GL2), mRNA.	2	5	7	0	0	0	11	9	20	13	14	27	0	0	0	0	0	0	0	0	0	0	27	#N/A	#N/A	#N/A
2192	NM_001076941	616005	RNF220	ring finger protein 220 (RNF220), mRNA.	6	3	9	0	0	0	6	12	18	12	15	27	0	0	0	0	0	0	0	0	0	0	27	#N/A	#N/A	#N/A
2422	NM_001078068	617148	PPP1R14C	protein phosphatase 1 regulatory inhibitor subunit 14C (PPP1R14C), mRNA.	19	3	22	0	2	2	1	2	3	20	7	27	0	0	0	0	0	0	0	0	0	0	27	#N/A	#N/A	#N/A
2474	NM_001079579	505627	GRAMD2B	GRAM domain containing 2B (GRAMD2B), mRNA.	9	15	24	0	0	0	0	3	3	9	18	27	0	0	0	0	0	0	0	0	0	0	27	#N/A	1	#N/A
2480	NM_001079594	514682	PRIM2	DNA primase subunit 2 (PRIM2), mRNA.	4	18	22	1	1	2	2	1	3	7	20	27	0	0	0	0	0	0	0	0	0	0	27	#N/A	#N/A	#N/A
2517	NM_001079789	615823	FGF12	fibroblast growth factor 12 (FGF12), mRNA.	14	13	27	0	0	0	0	0	0	14	13	27	0	0	0	0	0	0	0	0	0	0	27	#N/A	#N/A	#N/A
2545	NM_001080255	510301	ATP9B	ATPase phospholipid transporting 9B (putative) (ATP9B), mRNA.	10	14	24	1	0	1	2	0	2	13	14	27	0	0	0	0	0	0	0	0	0	0	27	#N/A	#N/A	#N/A
2610	NM_001080735	531369	TTF2	transcription termination factor 2 (TTF2), mRNA.	1	10	11	0	0	0	16	0	16	17	10	27	0	0	0	0	0	0	0	0	0	0	27	#N/A	#N/A	#N/A
2710	NM_001082452	539763	PARP11	poly(ADP-ribose) polymerase family member 11 (PARP11), mRNA.	0	20	20	1	0	1	6	0	6	7	20	27	0	0	0	0	0	0	0	0	0	0	27	1.2208	#N/A	#N/A
2789	NM_001083471	533829	SOX5	SRY-box transcription factor 5 (SOX5), mRNA.	11	5	16	0	2	2	1	8	9	12	15	27	0	0	0	0	0	0	0	0	0	0	27	#N/A	#N/A	#N/A
2935	NM_001098013	511440	COX10	cytochrome c oxidase assembly factor heme A:farnesyltransferase COX10 (COX10), mRNA; nuclear gene for mitochondrial product.	8	2	10	0	4	4	1	12	13	9	18	27	0	0	0	0	0	0	0	0	0	0	27	#N/A	#N/A	#N/A
3071	NM_001098938	511195	CYP39A1	cytochrome P450, family 39, subfamily A, polypeptide 1 (CYP39A1), mRNA.	4	13	17	3	0	3	3	2	5	10	15	25	1	0	1	0	0	0	0	0	0	2	27	#N/A	#N/A	#N/A
4134	NM_001113314	618399	GNG7	G protein subunit gamma 7 (GNG7), mRNA.	7	13	20	2	0	2	3	2	5	12	15	27	0	0	0	0	0	0	0	0	0	0	27	#N/A	#N/A	#N/A
4363	NM_001191122	781067	JMJD1C	jumonji domain containing 1C (JMJD1C), mRNA.	10	6	16	2	2	4	2	5	7	14	13	27	0	0	0	0	0	0	0	0	0	0	27	1.44261	#N/A	#N/A
4479	NM_001191359	539793	PPFIA4	PTPRF interacting protein alpha 4 (PPFIA4), mRNA.	4	9	13	1	1	2	4	0	4	9	10	19	0	3	3	0	0	0	1	0	1	8	27	#N/A	#N/A	#N/A
4482	NM_001191363	533980	CKAP5	cytoskeleton associated protein 5 (CKAP5), mRNA.	7	8	15	1	1	2	1	5	6	9	14	23	1	1	2	0	0	0	0	0	0	4	27	#N/A	#N/A	#N/A
4651	NM_001192169	508100	CDK5RAP2	CDK5 regulatory subunit associated protein 2 (CDK5RAP2), mRNA.	13	5	18	2	1	3	5	1	6	20	7	27	0	0	0	0	0	0	0	0	0	0	27	#N/A	#N/A	#N/A
4903	NM_001192629	526435	DLGAP1	DLG associated protein 1 (DLGAP1), mRNA.	13	10	23	0	0	0	1	3	4	14	13	27	0	0	0	0	0	0	0	0	0	0	27	#N/A	#N/A	#N/A
5062	NM_001192864	535831	ASB4	ankyrin repeat and SOCS box containing 4 (ASB4), mRNA.	0	18	18	2	0	2	3	0	3	5	18	23	0	2	2	0	0	0	0	0	0	4	27	#N/A	#N/A	ASB4
6052	NM_001206733	515501	ARHGAP20	Rho GTPase activating protein 20 (ARHGAP20), mRNA.	2	17	19	1	1	2	5	1	6	8	19	27	0	0	0	0	0	0	0	0	0	0	27	#N/A	#N/A	#N/A
6390	NM_173978	280977	ACP1	acid phosphatase 1 (ACP1), mRNA.	0	20	20	0	0	0	7	0	7	7	20	27	0	0	0	0	0	0	0	0	0	0	27	#N/A	#N/A	#N/A
7098	NR_131934	101905331	TUNAR	TCL1 upstream neural differentiation-associated RNA (TUNAR), long non-coding RNA.	3	20	23	2	0	2	2	0	2	7	20	27	0	0	0	0	0	0	0	0	0	0	27	#N/A	#N/A	#N/A
803	NM_001037474	533451	TRAPPC9	trafficking protein particle complex 9 (TRAPPC9), mRNA.	10	16	26	0	0	0	0	0	0	10	16	26	0	0	0	0	0	0	0	0	0	0	26	#N/A	#N/A	#N/A
1304	NM_001046426	537918	TDRD3	tudor domain containing 3 (TDRD3), mRNA.	3	21	24	0	0	0	1	1	2	4	22	26	0	0	0	0	0	0	0	0	0	0	26	#N/A	#N/A	#N/A
1459	NM_001075273	506600	SCYL3	SCY1 like pseudokinase 3 (SCYL3), mRNA.	3	16	19	1	0	1	6	0	6	10	16	26	0	0	0	0	0	0	0	0	0	0	26	#N/A	#N/A	#N/A
1833	NM_001076041	534915	ASCC1	activating signal cointegrator 1 complex subunit 1 (ASCC1), mRNA.	19	1	20	0	0	0	0	6	6	19	7	26	0	0	0	0	0	0	0	0	0	0	26	#N/A	#N/A	#N/A
3150	NM_001099068	535177	CELF4	CUGBP Elav-like family member 4 (CELF4), mRNA.	12	13	25	0	0	0	1	0	1	13	13	26	0	0	0	0	0	0	0	0	0	0	26	#N/A	#N/A	#N/A
3562	NM_001102050	518739	ANO4	anoctamin 4 (ANO4), mRNA.	14	9	23	0	2	2	1	0	1	15	11	26	0	0	0	0	0	0	0	0	0	0	26	#N/A	#N/A	#N/A
3869	NM_001103304	781239	PLCXD3	phosphatidylinositol specific phospholipase C X domain containing 3 (PLCXD3), mRNA.	4	16	20	2	0	2	4	0	4	10	16	26	0	0	0	0	0	0	0	0	0	0	26	#N/A	#N/A	PLCXD3
5099	NM_001192916	537712	EBF1	EBF transcription factor 1 (EBF1), mRNA.	10	3	13	0	0	0	3	10	13	13	13	26	0	0	0	0	0	0	0	0	0	0	26	#N/A	#N/A	#N/A
5580	NM_001205793	337916	IRF2	interferon regulatory factor 2 (IRF2), mRNA.	9	12	21	0	1	1	0	0	0	9	13	22	0	2	2	0	0	0	0	0	0	4	26	#N/A	#N/A	#N/A
6790	NM_174757	286771	ASPH	aspartate beta-hydroxylase (ASPH), mRNA.	5	20	25	0	0	0	1	0	1	6	20	26	0	0	0	0	0	0	0	0	0	0	26	#N/A	#N/A	#N/A
151	NM_001015519	505048	PRR5L	proline rich 5 like (PRR5L), mRNA.	15	8	23	0	1	1	0	1	1	15	10	25	0	0	0	0	0	0	0	0	0	0	25	#N/A	#N/A	#N/A
966	NM_001038558	529873	CADM1	cell adhesion molecule 1 (CADM1), mRNA.	12	10	22	1	0	1	0	2	2	13	12	25	0	0	0	0	0	0	0	0	0	0	25	-1.93702	#N/A	#N/A
1427	NM_001075201	505370	PRKAR1B	protein kinase cAMP-dependent type I regulatory subunit beta (PRKAR1B), mRNA.	14	10	24	0	0	0	1	0	1	15	10	25	0	0	0	0	0	0	0	0	0	0	25	#N/A	#N/A	#N/A
1696	NM_001075797	519974	NSMCE2	NSE2 (MMS21) homolog, SMC5-SMC6 complex SUMO ligase (NSMCE2), mRNA.	12	10	22	0	3	3	0	0	0	12	13	25	0	0	0	0	0	0	0	0	0	0	25	#N/A	#N/A	#N/A
1792	NM_001075974	532778	ARFGAP3	ADP ribosylation factor GTPase activating protein 3 (ARFGAP3), mRNA.	17	2	19	0	2	2	0	2	2	17	6	23	0	0	0	0	0	0	0	1	1	2	25	1.32438	#N/A	#N/A
1944	NM_001076260	541153	DTNA	dystrobrevin alpha (DTNA), mRNA.	10	4	14	0	5	5	0	6	6	10	15	25	0	0	0	0	0	0	0	0	0	0	25	#N/A	#N/A	#N/A
1981	NM_001076326	614409	AIG1	androgen induced 1 (AIG1), mRNA.	5	5	10	0	0	0	6	7	13	11	12	23	0	0	0	0	0	0	1	0	1	2	25	#N/A	#N/A	#N/A
2003	NM_001076357	615034	GLIPR1L1	GLIPR1 like 1 (GLIPR1L1), mRNA.	2	15	17	1	0	1	3	0	3	6	15	21	0	0	0	0	0	0	2	0	2	4	25	#N/A	#N/A	#N/A
2210	NM_001076975	767864	IL10RB	interleukin 10 receptor subunit beta (IL10RB), mRNA.	24	0	24	0	0	0	0	1	1	24	1	25	0	0	0	0	0	0	0	0	0	0	25	#N/A	#N/A	#N/A
2944	NM_001098029	514588	FBLN1	fibulin 1 (FBLN1), mRNA.	12	12	24	0	0	0	0	1	1	12	13	25	0	0	0	0	0	0	0	0	0	0	25	#N/A	#N/A	#N/A
3368	NM_001101156	534497	PMP22	peripheral myelin protein 22 (PMP22), mRNA.	9	1	10	0	4	4	1	10	11	10	15	25	0	0	0	0	0	0	0	0	0	0	25	#N/A	#N/A	#N/A
4161	NM_001114518	615798	PKIB	cAMP-dependent protein kinase inhibitor beta (PKIB), mRNA.	13	9	22	1	0	1	0	0	0	14	9	23	0	1	1	0	0	0	0	0	0	2	25	#N/A	#N/A	#N/A
4463	NM_001191336	536759	FER	FER tyrosine kinase (FER), mRNA.	15	8	23	1	0	1	0	1	1	16	9	25	0	0	0	0	0	0	0	0	0	0	25	#N/A	#N/A	#N/A
4788	NM_001192448	516527	KBTBD12	kelch repeat and BTB domain containing 12 (KBTBD12), mRNA.	13	4	17	0	1	1	0	5	5	13	10	23	0	1	1	0	0	0	0	0	0	2	25	#N/A	#N/A	#N/A
5239	NM_001193132	616901	CERS6	ceramide synthase 6 (CERS6), mRNA.	4	5	9	0	0	0	5	11	16	9	16	25	0	0	0	0	0	0	0	0	0	0	25	#N/A	#N/A	#N/A
5332	NM_001199131	615152	C14H8orf34	chromosome 14 C8orf34 homolog (C14H8orf34), mRNA.	9	8	17	0	3	3	0	5	5	9	16	25	0	0	0	0	0	0	0	0	0	0	25	#N/A	#N/A	#N/A
5422	NM_001205493	519251	MAP3K20	mitogen-activated protein kinase kinase kinase 20 (MAP3K20), mRNA.	9	2	11	0	0	0	5	9	14	14	11	25	0	0	0	0	0	0	0	0	0	0	25	1.96133	#N/A	#N/A
5518	NM_001205668	539452	SRGAP1	SLIT-ROBO Rho GTPase activating protein 1 (SRGAP1), mRNA.	4	19	23	2	0	2	0	0	0	6	19	25	0	0	0	0	0	0	0	0	0	0	25	-1.92465	#N/A	#N/A
5561	NM_001205767	513740	FAM21A	family with sequence similarity 21, member A (FAM21A), mRNA.	11	7	18	0	0	0	0	7	7	11	14	25	0	0	0	0	0	0	0	0	0	0	25	#N/A	#N/A	#N/A
5699	NM_001205987	282608	CACNA2D1	calcium voltage-gated channel auxiliary subunit alpha2delta 1 (CACNA2D1), mRNA.	6	14	20	0	0	0	3	2	5	9	16	25	0	0	0	0	0	0	0	0	0	0	25	#N/A	#N/A	#N/A
5717	NM_001206018	533296	TRIM33	tripartite motif containing 33 (TRIM33), mRNA.	1	12	13	0	0	0	10	2	12	11	14	25	0	0	0	0	0	0	0	0	0	0	25	#N/A	#N/A	#N/A
6521	NM_174239	281615	ALDH1A1	aldehyde dehydrogenase 1 family member A1 (ALDH1A1), mRNA.	10	11	21	1	0	1	1	2	3	12	13	25	0	0	0	0	0	0	0	0	0	0	25	2.57732	#N/A	#N/A
6831	NM_174841	317697	ITPR1	inositol 1,4,5-trisphosphate receptor type 1 (ITPR1), mRNA.	12	12	24	0	0	0	0	1	1	12	13	25	0	0	0	0	0	0	0	0	0	0	25	#N/A	#N/A	#N/A
6837	NM_175712	281730	CTBP2	C-terminal binding protein 2 (CTBP2), mRNA.	18	0	18	0	2	2	0	5	5	18	7	25	0	0	0	0	0	0	0	0	0	0	25	#N/A	#N/A	#N/A
348	NM_001034210	504439	PAPSS1	3'-phosphoadenosine 5'-phosphosulfate synthase 1 (PAPSS1), mRNA.	10	6	16	0	0	0	5	1	6	15	7	22	1	0	1	0	0	0	0	0	0	2	24	#N/A	#N/A	#N/A
472	NM_001034522	517263	AMBRA1	autophagy and beclin 1 regulator 1 (AMBRA1), mRNA.	20	4	24	0	0	0	0	0	0	20	4	24	0	0	0	0	0	0	0	0	0	0	24	#N/A	1	#N/A
932	NM_001038209	615371	NFIA	nuclear factor I A (NFIA), mRNA.	16	5	21	0	0	0	1	2	3	17	7	24	0	0	0	0	0	0	0	0	0	0	24	2.85107	#N/A	#N/A
939	NM_001038223	618239	MND1	meiotic nuclear divisions 1 (MND1), mRNA.	10	9	19	0	0	0	1	4	5	11	13	24	0	0	0	0	0	0	0	0	0	0	24	#N/A	#N/A	MND1
1044	NM_001045867	280812	GYG1	glycogenin 1 (GYG1), mRNA.	10	9	19	1	0	1	1	1	2	12	10	22	0	0	0	0	0	0	0	1	1	2	24	#N/A	#N/A	#N/A
1269	NM_001046350	533382	PKNOX1	PBX/knotted 1 homeobox 1 (PKNOX1), mRNA.	19	1	20	0	0	0	0	2	2	19	3	22	1	0	1	0	0	0	0	0	0	2	24	#N/A	#N/A	#N/A
1359	NM_001046552	615129	SHLD1	shieldin complex subunit 1 (SHLD1), mRNA.	21	1	22	0	0	0	1	1	2	22	2	24	0	0	0	0	0	0	0	0	0	0	24	#N/A	#N/A	#N/A
1885	NM_001076127	538771	KIF5C	kinesin family member 5C (KIF5C), mRNA.	14	4	18	1	2	3	0	3	3	15	9	24	0	0	0	0	0	0	0	0	0	0	24	#N/A	#N/A	KIF5C
1971	NM_001076306	614011	LYRM4	LYR motif containing 4 (LYRM4), mRNA.	16	8	24	0	0	0	0	0	0	16	8	24	0	0	0	0	0	0	0	0	0	0	24	#N/A	#N/A	#N/A
2470	NM_001079509	615926	GULP1	GULP PTB domain containing engulfment adaptor 1 (GULP1), mRNA.	1	18	19	1	0	1	4	0	4	6	18	24	0	0	0	0	0	0	0	0	0	0	24	#N/A	#N/A	#N/A
2571	NM_001080300	534568	KCNMB2	potassium calcium-activated channel subfamily M regulatory beta subunit 2 (KCNMB2), mRNA.	6	14	20	2	0	2	0	2	2	8	16	24	0	0	0	0	0	0	0	0	0	0	24	#N/A	#N/A	#N/A
2736	NM_001083376	505757	PPP2R5C	protein phosphatase 2 regulatory subunit B'gamma (PPP2R5C), mRNA.	10	10	20	1	0	1	3	0	3	14	10	24	0	0	0	0	0	0	0	0	0	0	24	#N/A	#N/A	#N/A
2800	NM_001083489	538706	COMMD10	COMM domain containing 10 (COMMD10), mRNA.	8	4	12	0	1	1	3	8	11	11	13	24	0	0	0	0	0	0	0	0	0	0	24	#N/A	#N/A	#N/A
3346	NM_001101118	524155	PARN	poly(A)-specific ribonuclease (PARN), mRNA.	15	6	21	1	0	1	0	2	2	16	8	24	0	0	0	0	0	0	0	0	0	0	24	#N/A	#N/A	#N/A
3513	NM_001101970	513262	TEX2	testis expressed 2 (TEX2), mRNA.	17	2	19	1	1	2	0	3	3	18	6	24	0	0	0	0	0	0	0	0	0	0	24	#N/A	#N/A	#N/A
3629	NM_001102148	532995	PRORP	protein only RNase P catalytic subunit (PRORP), mRNA; nuclear gene for mitochondrial product.	1	20	21	0	0	0	3	0	3	4	20	24	0	0	0	0	0	0	0	0	0	0	24	#N/A	#N/A	#N/A
3873	NM_001103315	100125236	MCPH1	microcephalin 1 (MCPH1), mRNA.	13	10	23	0	0	0	0	1	1	13	11	24	0	0	0	0	0	0	0	0	0	0	24	#N/A	#N/A	#N/A
3929	NM_001105027	790886	LOC790886	uncharacterized LOC790886 (LOC790886), mRNA.	11	7	18	1	2	3	2	1	3	14	10	24	0	0	0	0	0	0	0	0	0	0	24	#N/A	#N/A	#N/A
4286	NM_001164494	537141	KLHL29	kelch like family member 29 (KLHL29), mRNA.	1	4	5	0	0	0	7	12	19	8	16	24	0	0	0	0	0	0	0	0	0	0	24	#N/A	#N/A	#N/A
4918	NM_001192655	528167	TNRC6B	trinucleotide repeat containing adaptor 6B (TNRC6B), mRNA.	13	5	18	0	1	1	0	5	5	13	11	24	0	0	0	0	0	0	0	0	0	0	24	#N/A	#N/A	#N/A
5142	NM_001192975	514537	PCDH7	protocadherin 7 (PCDH7), mRNA.	6	9	15	0	1	1	1	7	8	7	17	24	0	0	0	0	0	0	0	0	0	0	24	#N/A	#N/A	#N/A
5829	NM_001206180	509629	SLC36A2	solute carrier family 36 member 2 (SLC36A2), mRNA.	12	0	12	0	1	1	0	5	5	12	6	18	2	0	2	0	0	0	0	1	1	6	24	#N/A	#N/A	#N/A
6087	NM_001206816	541305	NR5A2	nuclear receptor subfamily 5 group A member 2 (NR5A2), mRNA.	8	14	22	1	0	1	0	1	1	9	15	24	0	0	0	0	0	0	0	0	0	0	24	#N/A	1	#N/A
6371	NM_173941	280873	MX2	MX dynamin like GTPase 2 (MX2), mRNA.	4	8	12	2	1	3	3	2	5	9	11	20	0	1	1	1	0	1	0	0	0	4	24	#N/A	#N/A	#N/A
6510	NM_174221	281584	ABCA4	ATP binding cassette subfamily A member 4 (ABCA4), mRNA.	8	14	22	1	0	1	1	0	1	10	14	24	0	0	0	0	0	0	0	0	0	0	24	#N/A	#N/A	#N/A
6941	NM_181033	282651	ADGRL3	adhesion G protein-coupled receptor L3 (ADGRL3), mRNA.	1	6	7	2	1	3	14	0	14	17	7	24	0	0	0	0	0	0	0	0	0	0	24	#N/A	#N/A	#N/A
371	NM_001034267	506291	MFF	mitochondrial fission factor (MFF), mRNA; nuclear gene for mitochondrial product.	19	0	19	0	0	0	0	0	0	19	0	19	2	0	2	0	0	0	0	0	0	4	23	#N/A	#N/A	#N/A
506	NM_001034593	533670	APBB1IP	amyloid beta precursor protein binding family B member 1 interacting protein (APBB1IP), mRNA.	1	20	21	1	0	1	1	0	1	3	20	23	0	0	0	0	0	0	0	0	0	0	23	-1.1993	#N/A	#N/A
779	NM_001035493	617142	HSF2BP	heat shock transcription factor 2 binding protein (HSF2BP), mRNA.	16	3	19	1	3	4	0	0	0	17	6	23	0	0	0	0	0	0	0	0	0	0	23	#N/A	#N/A	#N/A
848	NM_001038042	506059	ACSL6	acyl-CoA synthetase long chain family member 6 (ACSL6), mRNA.	17	3	20	0	0	0	0	3	3	17	6	23	0	0	0	0	0	0	0	0	0	0	23	#N/A	#N/A	#N/A
1332	NM_001046497	541078	MAT1A	methionine adenosyltransferase 1A (MAT1A), mRNA.	5	11	16	1	0	1	1	5	6	7	16	23	0	0	0	0	0	0	0	0	0	0	23	#N/A	#N/A	#N/A
1394	NM_001075129	282648	CACNA1A	calcium voltage-gated channel subunit alpha1 A (CACNA1A), mRNA.	17	5	22	0	0	0	0	1	1	17	6	23	0	0	0	0	0	0	0	0	0	0	23	#N/A	#N/A	#N/A
1505	NM_001075370	508712	KYAT3	kynurenine aminotransferase 3 (KYAT3), mRNA.	20	0	20	0	0	0	0	3	3	20	3	23	0	0	0	0	0	0	0	0	0	0	23	#N/A	#N/A	KYAT3
1790	NM_001075972	532695	PPHLN1	periphilin 1 (PPHLN1), mRNA.	10	8	18	0	0	0	4	1	5	14	9	23	0	0	0	0	0	0	0	0	0	0	23	#N/A	#N/A	#N/A
1827	NM_001076033	534629	TPD52L1	TPD52 like 1 (TPD52L1), mRNA.	16	0	16	0	3	3	0	4	4	16	7	23	0	0	0	0	0	0	0	0	0	0	23	3.61619	#N/A	TPD52L1
1963	NM_001076292	613859	SLC10A7	solute carrier family 10 member 7 (SLC10A7), mRNA.	17	3	20	0	1	1	0	2	2	17	6	23	0	0	0	0	0	0	0	0	0	0	23	#N/A	#N/A	#N/A
2078	NM_001076520	618784	TBC1D22A	TBC1 domain family member 22A (TBC1D22A), mRNA.	17	5	22	0	0	0	0	1	1	17	6	23	0	0	0	0	0	0	0	0	0	0	23	#N/A	#N/A	#N/A
2326	NM_001077886	509142	TXNL1	thioredoxin like 1 (TXNL1), mRNA.	14	6	20	0	0	0	3	0	3	17	6	23	0	0	0	0	0	0	0	0	0	0	23	#N/A	#N/A	#N/A
2408	NM_001078037	613567	STX8	syntaxin 8 (STX8), mRNA.	11	7	18	2	2	4	1	0	1	14	9	23	0	0	0	0	0	0	0	0	0	0	23	#N/A	#N/A	#N/A
2437	NM_001078098	768210	RELL1	RELT like 1 (RELL1), mRNA.	15	0	15	0	2	2	0	6	6	15	8	23	0	0	0	0	0	0	0	0	0	0	23	#N/A	#N/A	#N/A
2612	NM_001080904	509513	LOC509513	uncharacterized LOC509513 (LOC509513), mRNA.	5	9	14	1	0	1	2	0	2	8	9	17	0	2	2	0	0	0	1	0	1	6	23	#N/A	#N/A	LOC509513
3468	NM_001101876	506867	NSL1	NSL1 component of MIS12 kinetochore complex (NSL1), mRNA.	11	8	19	1	1	2	0	2	2	12	11	23	0	0	0	0	0	0	0	0	0	0	23	#N/A	#N/A	#N/A
3619	NM_001102133	530910	FRMD6	FERM domain containing 6 (FRMD6), mRNA.	19	0	19	0	0	0	0	4	4	19	4	23	0	0	0	0	0	0	0	0	0	0	23	#N/A	#N/A	#N/A
3994	NM_001105430	540922	ZC3H7A	zinc finger CCCH-type containing 7A (ZC3H7A), mRNA.	4	9	13	2	1	3	4	3	7	10	13	23	0	0	0	0	0	0	0	0	0	0	23	1.85365	#N/A	#N/A
4107	NM_001111120	507041	PRKCE	protein kinase C epsilon (PRKCE), mRNA.	8	10	18	0	1	1	1	3	4	9	14	23	0	0	0	0	0	0	0	0	0	0	23	#N/A	#N/A	#N/A
4260	NM_001163249	524144	KCNU1	potassium calcium-activated channel subfamily U member 1 (KCNU1), mRNA.	4	9	13	0	0	0	1	9	10	5	18	23	0	0	0	0	0	0	0	0	0	0	23	#N/A	#N/A	#N/A
4461	NM_001191333	526999	NOX3	NADPH oxidase 3 (NOX3), mRNA.	8	3	11	0	4	4	1	7	8	9	14	23	0	0	0	0	0	0	0	0	0	0	23	#N/A	#N/A	#N/A
4466	NM_001191341	613600	GUCY1A2	guanylate cyclase 1 soluble subunit alpha 2 (GUCY1A2), mRNA.	7	13	20	0	0	0	0	3	3	7	16	23	0	0	0	0	0	0	0	0	0	0	23	#N/A	#N/A	#N/A
4516	NM_001191433	540948	N4BP1	NEDD4 binding protein 1 (N4BP1), mRNA.	9	5	14	0	2	2	0	7	7	9	14	23	0	0	0	0	0	0	0	0	0	0	23	#N/A	#N/A	#N/A
4538	NM_001191473	528990	RRP12	ribosomal RNA processing 12 homolog (RRP12), mRNA.	1	17	18	0	0	0	1	0	1	2	17	19	0	2	2	0	0	0	0	0	0	4	23	#N/A	#N/A	#N/A
4661	NM_001192188	508513	UBE3C	ubiquitin protein ligase E3C (UBE3C), mRNA.	17	2	19	0	0	0	0	4	4	17	6	23	0	0	0	0	0	0	0	0	0	0	23	#N/A	#N/A	#N/A
4987	NM_001192761	533191	TMTC1	transmembrane O-mannosyltransferase targeting cadherins 1 (TMTC1), mRNA.	11	3	14	0	0	0	1	8	9	12	11	23	0	0	0	0	0	0	0	0	0	0	23	#N/A	#N/A	#N/A
5112	NM_001192935	538365	SLC35F3	solute carrier family 35 member F3 (SLC35F3), mRNA.	3	4	7	0	0	0	3	13	16	6	17	23	0	0	0	0	0	0	0	0	0	0	23	#N/A	#N/A	#N/A
5350	NM_001205333	515338	ACACB	acetyl-CoA carboxylase beta (ACACB), mRNA.	2	13	15	1	1	2	4	0	4	7	14	21	0	0	0	0	0	0	0	1	1	2	23	#N/A	#N/A	#N/A
5634	NM_001205885	521387	TRAPPC10	trafficking protein particle complex 10 (TRAPPC10), mRNA.	4	16	20	1	0	1	2	0	2	7	16	23	0	0	0	0	0	0	0	0	0	0	23	#N/A	#N/A	#N/A
5814	NM_001206160	535030	TNKS	tankyrase (TNKS), mRNA.	4	12	16	0	0	0	2	3	5	6	15	21	0	1	1	0	0	0	0	0	0	2	23	#N/A	#N/A	#N/A
6592	NM_174372	281881	KCNH1	potassium voltage-gated channel subfamily H member 1 (KCNH1), mRNA.	5	16	21	0	0	0	2	0	2	7	16	23	0	0	0	0	0	0	0	0	0	0	23	#N/A	#N/A	#N/A
6791	NM_174758	286772	NPC1	NPC intracellular cholesterol transporter 1 (NPC1), mRNA.	14	4	18	0	1	1	0	4	4	14	9	23	0	0	0	0	0	0	0	0	0	0	23	#N/A	#N/A	#N/A
6913	NM_178109	347700	EIF2AK2	eukaryotic translation initiation factor 2 alpha kinase 2 (EIF2AK2), mRNA.	4	12	16	1	1	2	5	0	5	10	13	23	0	0	0	0	0	0	0	0	0	0	23	#N/A	#N/A	#N/A
424	NM_001034409	511767	EEPD1	endonuclease/exonuclease/phosphatase family domain containing 1 (EEPD1), mRNA.	7	5	12	0	0	0	4	6	10	11	11	22	0	0	0	0	0	0	0	0	0	0	22	#N/A	#N/A	#N/A
1823	NM_001076028	534558	DERA	deoxyribose-phosphate aldolase (DERA), mRNA.	7	5	12	1	0	1	0	5	5	8	10	18	2	0	2	0	0	0	0	0	0	4	22	#N/A	#N/A	#N/A
2400	NM_001078014	538496	CACNG3	calcium voltage-gated channel auxiliary subunit gamma 3 (CACNG3), mRNA.	9	7	16	0	0	0	2	4	6	11	11	22	0	0	0	0	0	0	0	0	0	0	22	#N/A	#N/A	#N/A
2657	NM_001081603	533861	MAPKAP1	MAPK associated protein 1 (MAPKAP1), mRNA.	6	12	18	1	0	1	3	0	3	10	12	22	0	0	0	0	0	0	0	0	0	0	22	#N/A	#N/A	#N/A
3148	NM_001099066	534742	SLC25A24	solute carrier family 25 member 24 (SLC25A24), mRNA; nuclear gene for mitochondrial product.	0	16	16	2	0	2	3	1	4	5	17	22	0	0	0	0	0	0	0	0	0	0	22	#N/A	#N/A	#N/A
3313	NM_001101050	504557	UPB1	beta-ureidopropionase 1 (UPB1), mRNA.	6	1	7	0	0	0	0	1	1	6	2	8	7	0	7	0	0	0	0	0	0	14	22	1.78622	#N/A	#N/A
3481	NM_001101893	508025	ZNF423	zinc finger protein 423 (ZNF423), mRNA.	9	7	16	0	0	0	3	3	6	12	10	22	0	0	0	0	0	0	0	0	0	0	22	#N/A	#N/A	#N/A
3914	NM_001104987	533635	MCTP1	multiple C2 and transmembrane domain containing 1 (MCTP1), mRNA.	19	0	19	0	1	1	0	2	2	19	3	22	0	0	0	0	0	0	0	0	0	0	22	#N/A	1	#N/A
4146	NM_001113764	512484	TYK2	tyrosine kinase 2 (TYK2), mRNA.	15	2	17	0	2	2	0	3	3	15	7	22	0	0	0	0	0	0	0	0	0	0	22	#N/A	#N/A	#N/A
4320	NM_001166566	509258	RNASEH2B	ribonuclease H2 subunit B (RNASEH2B), mRNA.	0	15	15	4	0	4	3	0	3	7	15	22	0	0	0	0	0	0	0	0	0	0	22	#N/A	#N/A	#N/A
4431	NM_001191269	539573	MEIS2	Meis homeobox 2 (MEIS2), mRNA.	6	6	12	0	0	0	4	6	10	10	12	22	0	0	0	0	0	0	0	0	0	0	22	#N/A	#N/A	#N/A
4801	NM_001192472	517417	XRN2	5'-3' exoribonuclease 2 (XRN2), mRNA.	19	0	19	0	0	0	0	1	1	19	1	20	1	0	1	0	0	0	0	0	0	2	22	#N/A	#N/A	#N/A
4856	NM_001192555	522188	PTPRQ	protein tyrosine phosphatase receptor type Q (PTPRQ), mRNA.	9	9	18	1	1	2	2	0	2	12	10	22	0	0	0	0	0	0	0	0	0	0	22	#N/A	#N/A	#N/A
5155	NM_001192992	508251	FAT1	FAT atypical cadherin 1 (FAT1), mRNA.	12	6	18	1	0	1	1	2	3	14	8	22	0	0	0	0	0	0	0	0	0	0	22	-1.63603	#N/A	#N/A
5175	NM_001193026	614285	UVRAG	UV radiation resistance associated (UVRAG), mRNA.	10	11	21	0	0	0	1	0	1	11	11	22	0	0	0	0	0	0	0	0	0	0	22	#N/A	#N/A	#N/A
5176	NM_001193029	614346	TBL1XR1	TBL1X receptor 1 (TBL1XR1), mRNA.	10	9	19	0	1	1	1	1	2	11	11	22	0	0	0	0	0	0	0	0	0	0	22	#N/A	#N/A	#N/A
5188	NM_001193049	614880	PPM1H	protein phosphatase, Mg2+/Mn2+ dependent 1H (PPM1H), mRNA.	14	8	22	0	0	0	0	0	0	14	8	22	0	0	0	0	0	0	0	0	0	0	22	#N/A	#N/A	#N/A
5250	NM_001193146	617196	SLC26A7	solute carrier family 26 member 7 (SLC26A7), mRNA.	2	1	3	0	0	0	8	11	19	10	12	22	0	0	0	0	0	0	0	0	0	0	22	#N/A	#N/A	#N/A
5424	NM_001205496	519892	NUAK1	NUAK family kinase 1 (NUAK1), mRNA.	15	1	16	0	3	3	0	3	3	15	7	22	0	0	0	0	0	0	0	0	0	0	22	#N/A	#N/A	#N/A
5530	NM_001205707	511802	CDK19	cyclin dependent kinase 19 (CDK19), mRNA.	3	14	17	4	0	4	1	0	1	8	14	22	0	0	0	0	0	0	0	0	0	0	22	#N/A	#N/A	#N/A
5553	NM_001205753	513243	ZNF704	zinc finger protein 704 (ZNF704), mRNA.	5	16	21	0	0	0	0	1	1	5	17	22	0	0	0	0	0	0	0	0	0	0	22	#N/A	#N/A	#N/A
5723	NM_001206027	533633	WDR19	WD repeat domain 19 (WDR19), mRNA.	10	9	19	0	0	0	3	0	3	13	9	22	0	0	0	0	0	0	0	0	0	0	22	#N/A	#N/A	#N/A
5996	NM_001206587	505707	FAM78B	family with sequence similarity 78 member B (FAM78B), mRNA.	6	14	20	0	0	0	1	1	2	7	15	22	0	0	0	0	0	0	0	0	0	0	22	#N/A	#N/A	#N/A
7007	NR_030965	791042	MIR29B-2	microRNA mir-29b-2 (MIR29B-2), microRNA.	2	16	18	0	0	0	0	0	0	2	16	18	2	0	2	0	0	0	0	0	0	4	22	#N/A	#N/A	#N/A
1239	NM_001046298	529124	FLI1	Fli-1 proto-oncogene, ETS transcription factor (FLI1), mRNA.	2	18	20	1	0	1	0	0	0	3	18	21	0	0	0	0	0	0	0	0	0	0	21	#N/A	#N/A	#N/A
1275	NM_001046358	533671	CMTM8	CKLF like MARVEL transmembrane domain containing 8 (CMTM8), mRNA.	8	6	14	0	2	2	0	3	3	8	11	19	0	1	1	0	0	0	0	0	0	2	21	#N/A	#N/A	#N/A
1840	NM_001076054	535352	SCAMP1	secretory carrier membrane protein 1 (SCAMP1), mRNA.	2	8	10	2	0	2	9	0	9	13	8	21	0	0	0	0	0	0	0	0	0	0	21	#N/A	#N/A	#N/A
2037	NM_001076437	616908	CCSER1	coiled-coil serine rich protein 1 (CCSER1), mRNA.	8	9	17	0	0	0	2	2	4	10	11	21	0	0	0	0	0	0	0	0	0	0	21	#N/A	#N/A	#N/A
2354	NM_001077941	520348	MARCHF3	membrane associated ring-CH-type finger 3 (MARCHF3), mRNA.	7	7	14	1	1	2	1	2	3	9	10	19	1	0	1	0	0	0	0	0	0	2	21	#N/A	#N/A	#N/A
2886	NM_001083763	614049	NPAS2	neuronal PAS domain protein 2 (NPAS2), mRNA.	16	4	20	0	0	0	0	1	1	16	5	21	0	0	0	0	0	0	0	0	0	0	21	3.01666	#N/A	#N/A
3086	NM_001098964	513870	HPCAL1	hippocalcin like 1 (HPCAL1), mRNA.	12	6	18	2	0	2	1	0	1	15	6	21	0	0	0	0	0	0	0	0	0	0	21	#N/A	#N/A	HPCAL1
3547	NM_001102028	515621	PIK3R6	phosphoinositide-3-kinase regulatory subunit 6 (PIK3R6), mRNA.	8	2	10	0	2	2	0	1	1	8	5	13	4	0	4	0	0	0	0	0	0	8	21	#N/A	#N/A	#N/A
4144	NM_001113760	539767	RASSF5	Ras association domain family member 5 (RASSF5), mRNA.	6	11	17	0	0	0	2	2	4	8	13	21	0	0	0	0	0	0	0	0	0	0	21	#N/A	#N/A	#N/A
4242	NM_001145203	100139490	SHISA9	shisa family member 9 (SHISA9), mRNA.	6	13	19	0	0	0	2	0	2	8	13	21	0	0	0	0	0	0	0	0	0	0	21	#N/A	#N/A	#N/A
4366	NM_001191131	523645	ADAM22	ADAM metallopeptidase domain 22 (ADAM22), mRNA.	7	13	20	1	0	1	0	0	0	8	13	21	0	0	0	0	0	0	0	0	0	0	21	#N/A	#N/A	#N/A
4517	NM_001191435	614678	CBFB	core-binding factor subunit beta (CBFB), mRNA.	0	9	9	3	0	3	8	1	9	11	10	21	0	0	0	0	0	0	0	0	0	0	21	-1.21409	#N/A	#N/A
4705	NM_001192277	539570	SIK2	salt inducible kinase 2 (SIK2), mRNA.	11	7	18	0	0	0	2	1	3	13	8	21	0	0	0	0	0	0	0	0	0	0	21	#N/A	#N/A	#N/A
4941	NM_001192691	530159	CDKAL1	CDK5 regulatory subunit associated protein 1 like 1 (CDKAL1), mRNA.	2	17	19	0	0	0	2	0	2	4	17	21	0	0	0	0	0	0	0	0	0	0	21	#N/A	#N/A	#N/A
5105	NM_001192923	537810	AKAP6	A-kinase anchoring protein 6 (AKAP6), mRNA.	9	8	17	0	0	0	1	1	2	10	9	19	0	0	0	0	1	1	0	0	0	2	21	-2.78036	#N/A	#N/A
5144	NM_001192977	519486	NPSR1	neuropeptide S receptor 1 (NPSR1), mRNA.	5	2	7	0	0	0	5	7	12	10	9	19	0	0	0	0	0	0	1	0	1	2	21	#N/A	#N/A	#N/A
5219	NM_001193102	537277	SCN8A	sodium voltage-gated channel alpha subunit 8 (SCN8A), mRNA.	6	11	17	0	0	0	0	0	0	6	11	17	1	1	2	0	0	0	0	0	0	4	21	#N/A	#N/A	#N/A
5224	NM_001193108	616320	SLC9B2	solute carrier family 9 member B2 (SLC9B2), mRNA.	1	18	19	0	0	0	2	0	2	3	18	21	0	0	0	0	0	0	0	0	0	0	21	#N/A	1	#N/A
5227	NM_001193114	616468	TLL1	tolloid like 1 (TLL1), mRNA.	2	15	17	1	1	2	2	0	2	5	16	21	0	0	0	0	0	0	0	0	0	0	21	#N/A	#N/A	#N/A
5682	NM_001205965	529670	LAMA4	laminin subunit alpha 4 (LAMA4), mRNA.	5	15	20	0	0	0	1	0	1	6	15	21	0	0	0	0	0	0	0	0	0	0	21	#N/A	#N/A	#N/A
5955	NM_001206500	100138017	PTPRA	protein tyrosine phosphatase receptor type A (PTPRA), transcript variant 2, mRNA.	5	8	13	0	1	1	6	1	7	11	10	21	0	0	0	0	0	0	0	0	0	0	21	#N/A	#N/A	#N/A
6002	NM_001206594	513432	PAK5	p21 (RAC1) activated kinase 5 (PAK5), mRNA.	1	0	1	0	0	0	3	17	20	4	17	21	0	0	0	0	0	0	0	0	0	0	21	#N/A	#N/A	#N/A
6230	NM_001281913	529618	GRIA1	glutamate ionotropic receptor AMPA type subunit 1 (GRIA1), mRNA.	8	11	19	0	0	0	1	1	2	9	12	21	0	0	0	0	0	0	0	0	0	0	21	#N/A	#N/A	#N/A
6300	NM_001319887	100336984	LOC100336984	zinc finger protein 331 (LOC100336984), mRNA.	4	7	11	0	1	1	2	5	7	6	13	19	0	0	0	0	0	0	0	1	1	2	21	#N/A	#N/A	LOC100336984
6482	NM_174177	281478	SCIN	scinderin (SCIN), mRNA.	10	9	19	0	0	0	0	2	2	10	11	21	0	0	0	0	0	0	0	0	0	0	21	-2.94575	#N/A	#N/A
6537	NM_174268	281682	CFDP1	craniofacial development protein 1 (CFDP1), mRNA.	5	12	17	0	1	1	0	1	1	5	14	19	1	0	1	0	0	0	0	0	0	2	21	#N/A	#N/A	#N/A
6562	NM_174316	281762	FANCC	FA complementation group C (FANCC), mRNA.	12	8	20	0	0	0	0	1	1	12	9	21	0	0	0	0	0	0	0	0	0	0	21	#N/A	#N/A	#N/A
697	NM_001035330	518646	GPA33	glycoprotein A33 (GPA33), mRNA.	0	10	10	0	0	0	4	0	4	4	10	14	2	1	3	0	0	0	0	0	0	6	20	#N/A	1	#N/A
766	NM_001035463	615239	GPC3	glypican 3 (GPC3), mRNA.	8	7	15	0	0	0	0	5	5	8	12	20	0	0	0	0	0	0	0	0	0	0	20	#N/A	#N/A	#N/A
1111	NM_001046013	508774	GDAP2	ganglioside induced differentiation associated protein 2 (GDAP2), mRNA.	3	11	14	0	0	0	6	0	6	9	11	20	0	0	0	0	0	0	0	0	0	0	20	#N/A	#N/A	#N/A
1132	NM_001046055	510469	RTCA	RNA 3'-terminal phosphate cyclase (RTCA), mRNA.	18	0	18	0	1	1	0	1	1	18	2	20	0	0	0	0	0	0	0	0	0	0	20	#N/A	#N/A	#N/A
1557	NM_001075488	511080	PRIMPOL	primase and DNA directed polymerase (PRIMPOL), mRNA.	2	13	15	1	1	2	3	0	3	6	14	20	0	0	0	0	0	0	0	0	0	0	20	#N/A	#N/A	#N/A
1579	NM_001075537	511773	RBFOX3	RNA binding fox-1 homolog 3 (RBFOX3), mRNA.	5	13	18	0	0	0	0	0	0	5	13	18	0	1	1	0	0	0	0	0	0	2	20	#N/A	#N/A	#N/A
1622	NM_001075628	513572	ERAP2	endoplasmic reticulum aminopeptidase 2 (ERAP2), mRNA.	3	8	11	0	0	0	1	2	3	4	10	14	3	0	3	0	0	0	0	0	0	6	20	#N/A	#N/A	ERAP2
1757	NM_001075904	527979	DNAAF11	dynein axonemal assembly factor 11 (DNAAF11), mRNA.	8	8	16	1	1	2	1	1	2	10	10	20	0	0	0	0	0	0	0	0	0	0	20	#N/A	#N/A	#N/A
2021	NM_001076396	615820	PPA2	inorganic pyrophosphatase 2 (PPA2), mRNA; nuclear gene for mitochondrial product.	14	2	16	0	0	0	1	3	4	15	5	20	0	0	0	0	0	0	0	0	0	0	20	#N/A	#N/A	#N/A
2591	NM_001080347	783068	VSIR	V-set immunoregulatory receptor (VSIR), mRNA.	7	9	16	1	0	1	0	1	1	8	10	18	0	1	1	0	0	0	0	0	0	2	20	1.95341	#N/A	#N/A
3653	NM_001102183	535231	ERG	ETS transcription factor ERG (ERG), mRNA.	7	10	17	0	1	1	1	1	2	8	12	20	0	0	0	0	0	0	0	0	0	0	20	#N/A	#N/A	#N/A
3713	NM_001102289	615687	TMX3	thioredoxin related transmembrane protein 3 (TMX3), mRNA.	16	0	16	0	1	1	0	3	3	16	4	20	0	0	0	0	0	0	0	0	0	0	20	-1.42627	#N/A	#N/A
4225	NM_001144094	525618	SLC24A2	solute carrier family 24 member 2 (SLC24A2), mRNA.	1	7	8	0	0	0	11	1	12	12	8	20	0	0	0	0	0	0	0	0	0	0	20	#N/A	#N/A	#N/A
4434	NM_001191273	539421	DOCK10	dedicator of cytokinesis 10 (DOCK10), mRNA.	10	0	10	0	0	0	4	6	10	14	6	20	0	0	0	0	0	0	0	0	0	0	20	#N/A	#N/A	#N/A
4812	NM_001192489	518488	ITPK1	inositol-tetrakisphosphate 1-kinase (ITPK1), mRNA.	13	5	18	0	0	0	2	0	2	15	5	20	0	0	0	0	0	0	0	0	0	0	20	#N/A	#N/A	#N/A
4876	NM_001192588	524061	ADARB2	adenosine deaminase RNA specific B2 (inactive) (ADARB2), mRNA.	12	7	19	0	0	0	1	0	1	13	7	20	0	0	0	0	0	0	0	0	0	0	20	#N/A	#N/A	#N/A
5004	NM_001192790	533853	SENP6	SUMO specific peptidase 6 (SENP6), mRNA.	2	12	14	1	0	1	4	1	5	7	13	20	0	0	0	0	0	0	0	0	0	0	20	#N/A	#N/A	#N/A
5345	NM_001205309	512239	TTC17	tetratricopeptide repeat domain 17 (TTC17), mRNA.	4	14	18	0	0	0	2	0	2	6	14	20	0	0	0	0	0	0	0	0	0	0	20	#N/A	#N/A	#N/A
5361	NM_001205388	615365	C21H14orf180	chromosome 21 C14orf180 homolog (C21H14orf180), mRNA.	14	4	18	0	0	0	0	0	0	14	4	18	0	1	1	0	0	0	0	0	0	2	20	#N/A	1	#N/A
5390	NM_001205441	784876	KCNQ1	potassium voltage-gated channel subfamily Q member 1 (KCNQ1), mRNA.	1	13	14	0	0	0	2	4	6	3	17	20	0	0	0	0	0	0	0	0	0	0	20	#N/A	1	KCNQ1
5625	NM_001205869	520207	SYNE3	spectrin repeat containing nuclear envelope family member 3 (SYNE3), mRNA.	8	9	17	1	0	1	2	0	2	11	9	20	0	0	0	0	0	0	0	0	0	0	20	#N/A	#N/A	#N/A
6166	NM_001244140	281196	GLG1	golgi glycoprotein 1 (GLG1), mRNA.	14	4	18	0	1	1	0	1	1	14	6	20	0	0	0	0	0	0	0	0	0	0	20	#N/A	#N/A	#N/A
6174	NM_001244214	509230	CD99	CD99 molecule (CD99), mRNA.	1	13	14	1	0	1	5	0	5	7	13	20	0	0	0	0	0	0	0	0	0	0	20	-1.94369	#N/A	#N/A
6218	NM_001276701	537777	SEMA3A	semaphorin 3A (SEMA3A), mRNA.	2	8	10	0	0	0	3	7	10	5	15	20	0	0	0	0	0	0	0	0	0	0	20	#N/A	#N/A	#N/A
6328	NM_001359999	613524	PKIA	cAMP-dependent protein kinase inhibitor alpha (PKIA), transcript variant 2, mRNA.	6	11	17	0	0	0	3	0	3	9	11	20	0	0	0	0	0	0	0	0	0	0	20	#N/A	#N/A	#N/A
6370	NM_173940	280872	MX1	MX dynamin like GTPase 1 (MX1), mRNA.	3	10	13	2	1	3	0	0	0	5	11	16	0	2	2	0	0	0	0	0	0	4	20	#N/A	1	#N/A
6397	NM_173995	281017	ATRN	attractin (ATRN), mRNA.	6	8	14	0	1	1	1	2	3	7	11	18	0	0	0	0	0	0	1	0	1	2	20	#N/A	#N/A	#N/A
6472	NM_174161	281433	PSAP	prosaposin (PSAP), mRNA.	10	3	13	0	2	2	1	2	3	11	7	18	0	1	1	0	0	0	0	0	0	2	20	-1.34531	#N/A	#N/A
6540	NM_174276	281696	CLIC5	chloride intracellular channel 5 (CLIC5), mRNA.	8	9	17	0	0	0	3	0	3	11	9	20	0	0	0	0	0	0	0	0	0	0	20	#N/A	#N/A	#N/A
98	NM_001013604	541458	KCNIP1	potassium voltage-gated channel interacting protein 1 (KCNIP1), mRNA.	7	7	14	2	1	3	1	1	2	10	9	19	0	0	0	0	0	0	0	0	0	0	19	#N/A	#N/A	#N/A
137	NM_001014943	534329	ARL15	ADP ribosylation factor like GTPase 15 (ARL15), mRNA.	6	7	13	0	1	1	4	1	5	10	9	19	0	0	0	0	0	0	0	0	0	0	19	2.87406	#N/A	#N/A
629	NM_001035058	508458	ASMTL	acetylserotonin O-methyltransferase like (ASMTL), mRNA.	16	0	16	0	3	3	0	0	0	16	3	19	0	0	0	0	0	0	0	0	0	0	19	#N/A	#N/A	#N/A
859	NM_001038064	509259	GTF2F2	general transcription factor IIF subunit 2 (GTF2F2), mRNA.	15	2	17	0	0	0	0	0	0	15	2	17	1	0	1	0	0	0	0	0	0	2	19	#N/A	#N/A	#N/A
1148	NM_001046091	511603	PDIA5	protein disulfide isomerase family A member 5 (PDIA5), mRNA.	4	13	17	0	0	0	2	0	2	6	13	19	0	0	0	0	0	0	0	0	0	0	19	#N/A	#N/A	#N/A
1155	NM_001046101	511839	ATP6V0D2	ATPase H+ transporting V0 subunit d2 (ATP6V0D2), mRNA.	1	10	11	0	0	0	6	0	6	7	10	17	0	0	0	0	1	1	0	0	0	2	19	-4.11284	#N/A	#N/A
1157	NM_001046107	512029	SNX1	sorting nexin 1 (SNX1), mRNA.	0	12	12	1	0	1	2	0	2	3	12	15	0	1	1	0	0	0	1	0	1	4	19	#N/A	#N/A	#N/A
1217	NM_001046250	520297	ADAM32	ADAM metallopeptidase domain 32 (ADAM32), mRNA.	5	4	9	0	0	0	3	7	10	8	11	19	0	0	0	0	0	0	0	0	0	0	19	#N/A	#N/A	#N/A
1748	NM_001075879	525909	CHST9	carbohydrate sulfotransferase 9 (CHST9), mRNA.	7	12	19	0	0	0	0	0	0	7	12	19	0	0	0	0	0	0	0	0	0	0	19	#N/A	#N/A	#N/A
1764	NM_001075923	529405	ENPP3	ectonucleotide pyrophosphatase/phosphodiesterase 3 (ENPP3), mRNA.	8	6	14	1	2	3	0	2	2	9	10	19	0	0	0	0	0	0	0	0	0	0	19	2.79643	#N/A	#N/A
1816	NM_001076018	534296	MTHFD1L	methylenetetrahydrofolate dehydrogenase (NADP+ dependent) 1 like (MTHFD1L), mRNA; nuclear gene for mitochondrial product.	10	8	18	0	0	0	0	1	1	10	9	19	0	0	0	0	0	0	0	0	0	0	19	#N/A	#N/A	#N/A
1923	NM_001076215	540355	HS3ST5	heparan sulfate-glucosamine 3-sulfotransferase 5 (HS3ST5), mRNA.	12	4	16	1	0	1	1	1	2	14	5	19	0	0	0	0	0	0	0	0	0	0	19	#N/A	#N/A	#N/A
2051	NM_001076459	617441	COA8	cytochrome c oxidase assembly factor 8 (COA8), mRNA.	12	5	17	0	1	1	0	1	1	12	7	19	0	0	0	0	0	0	0	0	0	0	19	#N/A	1	#N/A
2786	NM_001083468	533617	PPP2R5E	protein phosphatase 2 regulatory subunit B'epsilon (PPP2R5E), mRNA.	2	7	9	0	0	0	4	6	10	6	13	19	0	0	0	0	0	0	0	0	0	0	19	#N/A	#N/A	#N/A
2827	NM_001083650	507386	ARFIP1	ADP ribosylation factor interacting protein 1 (ARFIP1), mRNA.	8	6	14	0	0	0	2	3	5	10	9	19	0	0	0	0	0	0	0	0	0	0	19	#N/A	#N/A	#N/A
3367	NM_001101155	534319	NID1	nidogen 1 (NID1), mRNA.	0	11	11	0	0	0	8	0	8	8	11	19	0	0	0	0	0	0	0	0	0	0	19	#N/A	#N/A	#N/A
3449	NM_001101837	504278	ABCA9	ATP binding cassette subfamily A member 9 (ABCA9), mRNA.	2	11	13	1	1	2	2	2	4	5	14	19	0	0	0	0	0	0	0	0	0	0	19	#N/A	#N/A	#N/A
4056	NM_001109793	511800	ANKH	ANKH inorganic pyrophosphate transport regulator (ANKH), mRNA.	6	12	18	0	0	0	1	0	1	7	12	19	0	0	0	0	0	0	0	0	0	0	19	#N/A	#N/A	#N/A
4103	NM_001110787	533065	SCN9A	sodium voltage-gated channel alpha subunit 9 (SCN9A), mRNA.	4	8	12	3	0	3	2	0	2	9	8	17	0	1	1	0	0	0	0	0	0	2	19	#N/A	#N/A	#N/A
4444	NM_001191294	523479	ABCA12	ATP binding cassette subfamily A member 12 (ABCA12), mRNA.	1	1	2	0	0	0	5	12	17	6	13	19	0	0	0	0	0	0	0	0	0	0	19	#N/A	#N/A	#N/A
4622	NM_001192109	319097	TXNRD3	thioredoxin reductase 3 (TXNRD3), mRNA.	6	11	17	2	0	2	0	0	0	8	11	19	0	0	0	0	0	0	0	0	0	0	19	#N/A	#N/A	#N/A
4690	NM_001192252	510311	OSBP2	oxysterol binding protein 2 (OSBP2), mRNA.	2	12	14	0	3	3	2	0	2	4	15	19	0	0	0	0	0	0	0	0	0	0	19	#N/A	#N/A	#N/A
4973	NM_001192743	540563	ASH1L	ASH1 like histone lysine methyltransferase (ASH1L), mRNA.	6	5	11	0	2	2	1	5	6	7	12	19	0	0	0	0	0	0	0	0	0	0	19	1.17112	#N/A	#N/A
5054	NM_001192856	535399	LEF1	lymphoid enhancer binding factor 1 (LEF1), mRNA.	12	3	15	0	1	1	0	3	3	12	7	19	0	0	0	0	0	0	0	0	0	0	19	#N/A	1	#N/A
5133	NM_001192964	445419	FZD3	frizzled class receptor 3 (FZD3), mRNA.	8	5	13	0	2	2	2	2	4	10	9	19	0	0	0	0	0	0	0	0	0	0	19	#N/A	#N/A	#N/A
5184	NM_001193042	614641	NUBPL	nucleotide binding protein like (NUBPL), mRNA.	8	10	18	0	0	0	1	0	1	9	10	19	0	0	0	0	0	0	0	0	0	0	19	#N/A	#N/A	#N/A
5225	NM_001193109	616342	SDCCAG8	serologically defined colon cancer antigen 8 (SDCCAG8), mRNA.	4	11	15	0	1	1	2	1	3	6	13	19	0	0	0	0	0	0	0	0	0	0	19	#N/A	#N/A	#N/A
5421	NM_001205492	511963	PDZRN4	PDZ domain containing ring finger 4 (PDZRN4), mRNA.	7	8	15	0	1	1	3	0	3	10	9	19	0	0	0	0	0	0	0	0	0	0	19	#N/A	#N/A	PDZRN4
5712	NM_001206009	532808	CLVS1	clavesin 1 (CLVS1), mRNA.	3	16	19	0	0	0	0	0	0	3	16	19	0	0	0	0	0	0	0	0	0	0	19	#N/A	#N/A	#N/A
5765	NM_001206088	535699	DLG5	discs large MAGUK scaffold protein 5 (DLG5), mRNA.	4	13	17	0	0	0	1	1	2	5	14	19	0	0	0	0	0	0	0	0	0	0	19	#N/A	#N/A	#N/A
5962	NM_001206511	536775	CNTNAP4	contactin associated protein family member 4 (CNTNAP4), mRNA.	7	5	12	1	1	2	1	4	5	9	10	19	0	0	0	0	0	0	0	0	0	0	19	#N/A	#N/A	#N/A
6037	NM_001206705	533445	ARNT2	aryl-hydrocarbon receptor nuclear translocator 2 (ARNT2), mRNA.	3	12	15	2	0	2	2	0	2	7	12	19	0	0	0	0	0	0	0	0	0	0	19	#N/A	#N/A	#N/A
6125	NM_001206918	540076	KIF21A	kinesin family member 21A (KIF21A), mRNA.	1	16	17	0	0	0	2	0	2	3	16	19	0	0	0	0	0	0	0	0	0	0	19	3.04555	#N/A	#N/A
6297	NM_001318764	540519	OPRK1	opioid receptor kappa 1 (OPRK1), transcript variant 1, mRNA.	3	5	8	0	0	0	1	2	3	4	7	11	0	0	0	0	0	0	0	4	4	8	19	#N/A	#N/A	#N/A
6320	NM_001354818	511676	PES1	pescadillo ribosomal biogenesis factor 1 (PES1), mRNA.	1	16	17	0	0	0	0	0	0	1	16	17	0	1	1	0	0	0	0	0	0	2	19	#N/A	2	PES1
6337	NM_173879	280687	F5	coagulation factor V (F5), mRNA.	13	1	14	0	1	1	0	4	4	13	6	19	0	0	0	0	0	0	0	0	0	0	19	#N/A	#N/A	#N/A
6377	NM_173951	280897	PLG	plasminogen (PLG), mRNA.	7	8	15	0	0	0	1	3	4	8	11	19	0	0	0	0	0	0	0	0	0	0	19	#N/A	#N/A	#N/A
6405	NM_174012	281056	CD247	CD247 molecule (CD247), mRNA.	3	5	8	0	1	1	1	3	4	4	9	13	1	2	3	0	0	0	0	0	0	6	19	#N/A	#N/A	#N/A
6594	NM_174374	281884	KCNQ3	potassium voltage-gated channel subfamily Q member 3 (KCNQ3), mRNA.	15	4	19	0	0	0	0	0	0	15	4	19	0	0	0	0	0	0	0	0	0	0	19	#N/A	#N/A	#N/A
6912	NM_177946	338471	PC	pyruvate carboxylase (PC), mRNA; nuclear gene for mitochondrial product.	9	8	17	0	0	0	1	1	2	10	9	19	0	0	0	0	0	0	0	0	0	0	19	#N/A	#N/A	#N/A
7102	NR_146189	100847413	MEG8	proline-rich receptor-like protein kinase PERK10 (MEG8), long non-coding RNA.	6	10	16	0	0	0	2	1	3	8	11	19	0	0	0	0	0	0	0	0	0	0	19	#N/A	#N/A	#N/A
147	NM_001015514	504512	ETV6	ETS variant transcription factor 6 (ETV6), mRNA.	6	12	18	0	0	0	0	0	0	6	12	18	0	0	0	0	0	0	0	0	0	0	18	#N/A	#N/A	#N/A
418	NM_001034397	510905	MFAP1	microfibril associated protein 1 (MFAP1), mRNA.	10	1	11	0	1	1	2	0	2	12	2	14	0	2	2	0	0	0	0	0	0	4	18	#N/A	#N/A	#N/A
774	NM_001035478	616564	SSBP2	single stranded DNA binding protein 2 (SSBP2), mRNA.	1	15	16	0	0	0	2	0	2	3	15	18	0	0	0	0	0	0	0	0	0	0	18	#N/A	#N/A	#N/A
805	NM_001037476	534401	ZBTB16	zinc finger and BTB domain containing 16 (ZBTB16), mRNA.	8	4	12	0	2	2	1	3	4	9	9	18	0	0	0	0	0	0	0	0	0	0	18	2.31404	#N/A	#N/A
1084	NM_001045966	507339	C7	complement C7 (C7), mRNA.	15	0	15	0	1	1	0	2	2	15	3	18	0	0	0	0	0	0	0	0	0	0	18	#N/A	#N/A	#N/A
1468	NM_001075288	506947	METTL8	methyltransferase 8, methylcytidine (METTL8), mRNA.	1	7	8	0	0	0	10	0	10	11	7	18	0	0	0	0	0	0	0	0	0	0	18	#N/A	#N/A	#N/A
2153	NM_001076881	528483	DDX10	DEAD-box helicase 10 (DDX10), mRNA.	8	2	10	0	2	2	0	6	6	8	10	18	0	0	0	0	0	0	0	0	0	0	18	#N/A	#N/A	#N/A
2542	NM_001080250	509575	JAML	junction adhesion molecule like (JAML), mRNA.	5	8	13	1	0	1	4	0	4	10	8	18	0	0	0	0	0	0	0	0	0	0	18	1.42413	#N/A	#N/A
2593	NM_001080352	783805	SDHAF3	succinate dehydrogenase complex assembly factor 3 (SDHAF3), mRNA; nuclear gene for mitochondrial product.	4	10	14	2	0	2	2	0	2	8	10	18	0	0	0	0	0	0	0	0	0	0	18	#N/A	#N/A	#N/A
2770	NM_001083437	516900	ZC2HC1A	zinc finger C2HC-type containing 1A (ZC2HC1A), mRNA.	5	9	14	0	2	2	2	0	2	7	11	18	0	0	0	0	0	0	0	0	0	0	18	#N/A	#N/A	#N/A
2776	NM_001083448	527014	SV2B	synaptic vesicle glycoprotein 2B (SV2B), mRNA.	1	12	13	0	1	1	4	0	4	5	13	18	0	0	0	0	0	0	0	0	0	0	18	#N/A	#N/A	#N/A
2815	NM_001083523	616704	MCC	MCC regulator of WNT signaling pathway (MCC), mRNA.	0	0	0	0	0	0	7	11	18	7	11	18	0	0	0	0	0	0	0	0	0	0	18	#N/A	#N/A	#N/A
2871	NM_001083741	539204	LRRC8D	leucine rich repeat containing 8 VRAC subunit D (LRRC8D), mRNA.	11	5	16	0	1	1	0	1	1	11	7	18	0	0	0	0	0	0	0	0	0	0	18	#N/A	#N/A	#N/A
2948	NM_001098036	515437	SLC39A14	solute carrier family 39 member 14 (SLC39A14), mRNA.	6	1	7	0	0	0	1	10	11	7	11	18	0	0	0	0	0	0	0	0	0	0	18	#N/A	#N/A	#N/A
3339	NM_001101106	521918	TADA1	transcriptional adaptor 1 (TADA1), mRNA.	10	4	14	0	0	0	2	0	2	12	4	16	0	0	0	0	0	0	0	1	1	2	18	#N/A	#N/A	TADA1
3342	NM_001101112	523223	PSTPIP2	proline-serine-threonine phosphatase interacting protein 2 (PSTPIP2), mRNA.	10	7	17	0	0	0	0	1	1	10	8	18	0	0	0	0	0	0	0	0	0	0	18	3.06158	#N/A	#N/A
3776	NM_001102503	520387	C2CD5	C2 calcium dependent domain containing 5 (C2CD5), mRNA.	13	0	13	0	0	0	0	5	5	13	5	18	0	0	0	0	0	0	0	0	0	0	18	#N/A	#N/A	#N/A
4010	NM_001105464	785924	ROR2	receptor tyrosine kinase like orphan receptor 2 (ROR2), mRNA.	4	11	15	1	0	1	0	0	0	5	11	16	1	0	1	0	0	0	0	0	0	2	18	#N/A	#N/A	#N/A
4115	NM_001113230	767889	ACYP2	acylphosphatase 2 (ACYP2), mRNA.	12	5	17	0	0	0	0	1	1	12	6	18	0	0	0	0	0	0	0	0	0	0	18	#N/A	#N/A	#N/A
4212	NM_001143868	513920	STYK1	serine/threonine/tyrosine kinase 1 (STYK1), mRNA.	12	0	12	0	0	0	0	0	0	12	0	12	3	0	3	0	0	0	0	0	0	6	18	#N/A	#N/A	#N/A
4499	NM_001191391	516864	ALDH1L2	aldehyde dehydrogenase 1 family member L2 (ALDH1L2), mRNA; nuclear gene for mitochondrial product.	2	12	14	1	0	1	3	0	3	6	12	18	0	0	0	0	0	0	0	0	0	0	18	#N/A	1	#N/A
4536	NM_001191468	507792	GTF2IRD1	GTF2I repeat domain containing 1 (GTF2IRD1), mRNA.	3	14	17	0	0	0	1	0	1	4	14	18	0	0	0	0	0	0	0	0	0	0	18	#N/A	#N/A	#N/A
4639	NM_001192137	507169	TRRAP	transformation/transcription domain associated protein (TRRAP), mRNA.	14	3	17	0	1	1	0	0	0	14	4	18	0	0	0	0	0	0	0	0	0	0	18	#N/A	#N/A	#N/A
4753	NM_001192367	514345	MCOLN3	mucolipin TRP cation channel 3 (MCOLN3), mRNA.	0	8	8	0	0	0	0	0	0	0	8	8	5	0	5	0	0	0	0	0	0	10	18	-3.13789	#N/A	#N/A
4782	NM_001192437	516069	HLF	HLF transcription factor, PAR bZIP family member (HLF), mRNA.	7	1	8	1	1	2	2	0	2	10	2	12	0	2	2	0	0	0	1	0	1	6	18	3.45144	#N/A	#N/A
4898	NM_001192622	282886	MMP16	matrix metallopeptidase 16 (MMP16), mRNA.	4	14	18	0	0	0	0	0	0	4	14	18	0	0	0	0	0	0	0	0	0	0	18	#N/A	#N/A	#N/A
4917	NM_001192652	528149	CHSY3	chondroitin sulfate synthase 3 (CHSY3), mRNA.	9	4	13	0	0	0	2	3	5	11	7	18	0	0	0	0	0	0	0	0	0	0	18	#N/A	#N/A	#N/A
5308	NM_001193243	532674	ADGRF5	adhesion G protein-coupled receptor F5 (ADGRF5), mRNA.	8	8	16	0	0	0	1	1	2	9	9	18	0	0	0	0	0	0	0	0	0	0	18	-3.6472	#N/A	#N/A
5507	NM_001205652	539295	ARFGEF2	ADP ribosylation factor guanine nucleotide exchange factor 2 (ARFGEF2), mRNA.	8	10	18	0	0	0	0	0	0	8	10	18	0	0	0	0	0	0	0	0	0	0	18	#N/A	#N/A	#N/A
5789	NM_001206125	613362	DTWD2	DTW domain containing 2 (DTWD2), mRNA.	1	9	10	0	0	0	6	0	6	7	9	16	0	1	1	0	0	0	0	0	0	2	18	#N/A	#N/A	#N/A
5863	NM_001206233	523970	TRAK2	trafficking kinesin protein 2 (TRAK2), mRNA.	4	0	4	0	1	1	0	13	13	4	14	18	0	0	0	0	0	0	0	0	0	0	18	#N/A	#N/A	#N/A
6105	NM_001206862	617325	KSR2	kinase suppressor of ras 2 (KSR2), mRNA.	3	14	17	0	0	0	1	0	1	4	14	18	0	0	0	0	0	0	0	0	0	0	18	#N/A	#N/A	#N/A
6144	NM_001242308	530799	CCDC141	coiled-coil domain containing 141 (CCDC141), mRNA.	5	6	11	0	0	0	0	1	1	5	7	12	1	2	3	0	0	0	0	0	0	6	18	#N/A	#N/A	#N/A
6324	NM_001359912	281940	NCALD	neurocalcin delta (NCALD), transcript variant 2, mRNA.	6	12	18	0	0	0	0	0	0	6	12	18	0	0	0	0	0	0	0	0	0	0	18	#N/A	#N/A	#N/A
6407	NM_174018	281067	CFTR	CF transmembrane conductance regulator (CFTR), mRNA.	1	16	17	0	0	0	0	1	1	1	17	18	0	0	0	0	0	0	0	0	0	0	18	#N/A	#N/A	#N/A
6464	NM_174138	281377	PARG	poly(ADP-ribose) glycohydrolase (PARG), mRNA.	9	4	13	0	0	0	3	2	5	12	6	18	0	0	0	0	0	0	0	0	0	0	18	#N/A	#N/A	#N/A
6967	NM_205784	404098	SND1	staphylococcal nuclease and tudor domain containing 1 (SND1), mRNA.	12	4	16	0	0	0	1	1	2	13	5	18	0	0	0	0	0	0	0	0	0	0	18	1.44495	#N/A	#N/A
713	NM_001035357	525416	CAMK2B	calcium/calmodulin dependent protein kinase II beta (CAMK2B), mRNA.	3	10	13	1	0	1	1	0	1	5	10	15	1	0	1	0	0	0	0	0	0	2	17	#N/A	#N/A	#N/A
852	NM_001038046	506607	AGPAT3	1-acylglycerol-3-phosphate O-acyltransferase 3 (AGPAT3), mRNA.	5	6	11	2	0	2	4	0	4	11	6	17	0	0	0	0	0	0	0	0	0	0	17	#N/A	#N/A	#N/A
986	NM_001038689	616791	NOPCHAP1	NOP protein chaperone 1 (NOPCHAP1), mRNA.	0	7	7	0	0	0	0	0	0	0	7	7	0	5	5	0	0	0	0	0	0	10	17	#N/A	#N/A	#N/A
1086	NM_001045968	507461	SIAE	sialic acid acetylesterase (SIAE), mRNA.	7	3	10	1	1	2	2	3	5	10	7	17	0	0	0	0	0	0	0	0	0	0	17	#N/A	#N/A	#N/A
1264	NM_001046342	533042	METAP1D	methionyl aminopeptidase type 1D, mitochondrial (METAP1D), mRNA; nuclear gene for mitochondrial product.	1	2	3	0	0	0	8	6	14	9	8	17	0	0	0	0	0	0	0	0	0	0	17	#N/A	#N/A	#N/A
1313	NM_001046451	539136	MEGF10	multiple EGF-like-domains 10 (MEGF10), mRNA.	9	4	13	0	0	0	1	3	4	10	7	17	0	0	0	0	0	0	0	0	0	0	17	#N/A	#N/A	#N/A
1421	NM_001075190	505124	LMF1	lipase maturation factor 1 (LMF1), mRNA.	13	3	16	0	0	0	0	1	1	13	4	17	0	0	0	0	0	0	0	0	0	0	17	#N/A	#N/A	#N/A
1806	NM_001075999	533703	XXYLT1	xyloside xylosyltransferase 1 (XXYLT1), mRNA.	5	8	13	1	0	1	0	1	1	6	9	15	0	1	1	0	0	0	0	0	0	2	17	#N/A	#N/A	#N/A
2102	NM_001076803	505156	TMEM131L	transmembrane 131 like (TMEM131L), mRNA.	11	5	16	0	0	0	1	0	1	12	5	17	0	0	0	0	0	0	0	0	0	0	17	#N/A	#N/A	#N/A
2117	NM_001076829	510686	RINT1	RAD50 interactor 1 (RINT1), mRNA.	7	6	13	0	2	2	1	1	2	8	9	17	0	0	0	0	0	0	0	0	0	0	17	#N/A	#N/A	#N/A
2139	NM_001076863	518542	PRKCH	protein kinase C eta (PRKCH), mRNA.	3	3	6	0	0	0	6	5	11	9	8	17	0	0	0	0	0	0	0	0	0	0	17	#N/A	#N/A	#N/A
2318	NM_001077863	506537	ALG14	ALG14 UDP-N-acetylglucosaminyltransferase subunit (ALG14), mRNA.	1	10	11	2	0	2	2	0	2	5	10	15	0	1	1	0	0	0	0	0	0	2	17	#N/A	#N/A	#N/A
2382	NM_001077990	532944	LHFPL6	LHFPL tetraspan subfamily member 6 (LHFPL6), mRNA.	6	10	16	0	0	0	1	0	1	7	10	17	0	0	0	0	0	0	0	0	0	0	17	#N/A	#N/A	#N/A
2690	NM_001081740	614412	NRXN3	neurexin 3 (NRXN3), mRNA.	5	10	15	0	0	0	0	2	2	5	12	17	0	0	0	0	0	0	0	0	0	0	17	#N/A	#N/A	#N/A
3166	NM_001099100	539790	POGK	pogo transposable element derived with KRAB domain (POGK), mRNA.	1	3	4	2	1	3	2	0	2	5	4	9	0	3	3	0	0	0	1	0	1	8	17	#N/A	#N/A	POGK
3400	NM_001101207	540367	PCED1B	PC-esterase domain containing 1B (PCED1B), mRNA.	8	5	13	1	0	1	1	2	3	10	7	17	0	0	0	0	0	0	0	0	0	0	17	#N/A	#N/A	#N/A
3455	NM_001101848	505080	TGM3	transglutaminase 3 (TGM3), mRNA.	6	3	9	0	0	0	2	0	2	8	3	11	2	1	3	0	0	0	0	0	0	6	17	3.79244	#N/A	#N/A
3642	NM_001102169	534290	ANO10	anoctamin 10 (ANO10), mRNA.	6	5	11	0	1	1	2	3	5	8	9	17	0	0	0	0	0	0	0	0	0	0	17	-1.36511	#N/A	#N/A
3792	NM_001102528	781953	MATN2	matrilin 2 (MATN2), mRNA.	6	0	6	0	1	1	0	10	10	6	11	17	0	0	0	0	0	0	0	0	0	0	17	#N/A	#N/A	#N/A
3856	NM_001103283	538148	LRRTM3	leucine rich repeat transmembrane neuronal 3 (LRRTM3), mRNA.	11	4	15	1	0	1	0	1	1	12	5	17	0	0	0	0	0	0	0	0	0	0	17	#N/A	#N/A	#N/A
3908	NM_001104976	513626	FANCM	Fanconi anemia complementation group M (FANCM), mRNA.	13	0	13	0	1	1	0	3	3	13	4	17	0	0	0	0	0	0	0	0	0	0	17	#N/A	#N/A	#N/A
4467	NM_001191342	537595	MGAT5	alpha-1,6-mannosylglycoprotein 6-beta-N-acetylglucosaminyltransferase (MGAT5), mRNA.	3	2	5	2	2	4	7	1	8	12	5	17	0	0	0	0	0	0	0	0	0	0	17	#N/A	#N/A	#N/A
4965	NM_001192734	532671	MCOLN2	mucolipin TRP cation channel 2 (MCOLN2), mRNA.	12	1	13	0	1	1	0	3	3	12	5	17	0	0	0	0	0	0	0	0	0	0	17	#N/A	#N/A	#N/A
4983	NM_001192757	533166	SORL1	sortilin-related receptor, L(DLR class) A repeats containing (SORL1), mRNA.	9	8	17	0	0	0	0	0	0	9	8	17	0	0	0	0	0	0	0	0	0	0	17	#N/A	#N/A	#N/A
5157	NM_001192995	508018	FREM1	FRAS1 related extracellular matrix 1 (FREM1), mRNA.	1	8	9	0	0	0	4	4	8	5	12	17	0	0	0	0	0	0	0	0	0	0	17	#N/A	#N/A	#N/A
5196	NM_001193062	512817	ARHGAP1	Rho GTPase activating protein 1 (ARHGAP1), mRNA.	7	6	13	0	1	1	0	1	1	7	8	15	1	0	1	0	0	0	0	0	0	2	17	#N/A	#N/A	#N/A
5285	NM_001193212	513597	MYOF	myoferlin (MYOF), mRNA.	5	8	13	0	0	0	3	1	4	8	9	17	0	0	0	0	0	0	0	0	0	0	17	-2.50956	#N/A	#N/A
5306	NM_001193241	509874	GTF3C1	general transcription factor IIIC subunit 1 (GTF3C1), mRNA.	7	2	9	0	0	0	8	0	8	15	2	17	0	0	0	0	0	0	0	0	0	0	17	#N/A	#N/A	#N/A
5373	NM_001205419	519271	ERC1	ELKS/RAB6-interacting/CAST family member 1 (ERC1), mRNA.	8	5	13	0	0	0	0	4	4	8	9	17	0	0	0	0	0	0	0	0	0	0	17	#N/A	#N/A	#N/A
5483	NM_001205616	507622	FRY	FRY microtubule binding protein (FRY), mRNA.	6	9	15	1	0	1	1	0	1	8	9	17	0	0	0	0	0	0	0	0	0	0	17	#N/A	#N/A	#N/A
5607	NM_001205841	517433	TNN	tenascin N (TNN), mRNA.	9	0	9	0	0	0	1	7	8	10	7	17	0	0	0	0	0	0	0	0	0	0	17	#N/A	#N/A	#N/A
5618	NM_001205855	519372	INTU	inturned planar cell polarity protein (INTU), mRNA.	5	9	14	0	0	0	1	2	3	6	11	17	0	0	0	0	0	0	0	0	0	0	17	#N/A	#N/A	#N/A
5623	NM_001205865	519843	SRGAP2	SLIT-ROBO Rho GTPase activating protein 2 (SRGAP2), mRNA.	9	7	16	0	0	0	1	0	1	10	7	17	0	0	0	0	0	0	0	0	0	0	17	#N/A	#N/A	#N/A
5799	NM_001206138	537748	DYNC1H1	dynein cytoplasmic 1 heavy chain 1 (DYNC1H1), mRNA.	1	11	12	0	0	0	5	0	5	6	11	17	0	0	0	0	0	0	0	0	0	0	17	#N/A	#N/A	#N/A
6001	NM_001206593	512152	CEP162	centrosomal protein 162 (CEP162), mRNA.	0	1	1	2	5	7	3	6	9	5	12	17	0	0	0	0	0	0	0	0	0	0	17	#N/A	#N/A	#N/A
6043	NM_001206716	509974	ADGRG5	adhesion G protein-coupled receptor G5 (ADGRG5), mRNA.	12	0	12	0	1	1	0	2	2	12	3	15	0	0	0	0	0	0	0	1	1	2	17	#N/A	#N/A	#N/A
6073	NM_001206781	790124	VIPR2	vasoactive intestinal peptide receptor 2 (VIPR2), mRNA.	7	8	15	0	0	0	0	2	2	7	10	17	0	0	0	0	0	0	0	0	0	0	17	#N/A	#N/A	#N/A
6076	NM_001206784	525643	OTOP1	otopetrin 1 (OTOP1), mRNA.	6	7	13	2	0	2	2	0	2	10	7	17	0	0	0	0	0	0	0	0	0	0	17	#N/A	#N/A	#N/A
6079	NM_001206791	787651	LRRCC1	leucine rich repeat and coiled-coil centrosomal protein 1 (LRRCC1), mRNA.	11	1	12	0	1	1	0	4	4	11	6	17	0	0	0	0	0	0	0	0	0	0	17	#N/A	#N/A	#N/A
6088	NM_001206817	532572	LAMC1	laminin subunit gamma 1 (LAMC1), mRNA.	3	12	15	0	0	0	2	0	2	5	12	17	0	0	0	0	0	0	0	0	0	0	17	#N/A	#N/A	#N/A
6136	NM_001206982	522049	CDC20B	cell division cycle 20B (CDC20B), mRNA.	13	0	13	0	1	1	0	3	3	13	4	17	0	0	0	0	0	0	0	0	0	0	17	#N/A	#N/A	#N/A
6223	NM_001278588	540017	FBN2	fibrillin 2 (FBN2), mRNA.	7	4	11	1	2	3	1	2	3	9	8	17	0	0	0	0	0	0	0	0	0	0	17	#N/A	#N/A	#N/A
6618	NM_174414	281969	PDE1A	phosphodiesterase 1A (PDE1A), mRNA.	9	5	14	0	0	0	0	3	3	9	8	17	0	0	0	0	0	0	0	0	0	0	17	#N/A	#N/A	#N/A
6762	NM_174696	282641	ATP2B1	ATPase plasma membrane Ca2+ transporting 1 (ATP2B1), mRNA.	15	1	16	0	0	0	0	1	1	15	2	17	0	0	0	0	0	0	0	0	0	0	17	#N/A	#N/A	ATP2B1
156	NM_001015528	505792	MVK	mevalonate kinase (MVK), mRNA.	8	5	13	0	1	1	1	1	2	9	7	16	0	0	0	0	0	0	0	0	0	0	16	1.98186	#N/A	#N/A
270	NM_001024547	515536	ABCG5	ATP binding cassette subfamily G member 5 (ABCG5), mRNA.	0	10	10	0	0	0	2	0	2	2	10	12	0	1	1	0	0	0	1	0	1	4	16	#N/A	#N/A	#N/A
466	NM_001034504	515652	HMGN3	high mobility group nucleosomal binding domain 3 (HMGN3), mRNA.	1	12	13	1	0	1	2	0	2	4	12	16	0	0	0	0	0	0	0	0	0	0	16	#N/A	#N/A	#N/A
530	NM_001034634	536021	RAB28	RAB28, member RAS oncogene family (RAB28), mRNA.	6	3	9	1	0	1	3	3	6	10	6	16	0	0	0	0	0	0	0	0	0	0	16	#N/A	#N/A	#N/A
565	NM_001034720	540990	LCP1	lymphocyte cytosolic protein 1 (LCP1), mRNA.	6	4	10	0	0	0	0	0	0	6	4	10	2	0	2	0	1	1	0	0	0	6	16	#N/A	#N/A	#N/A
1030	NM_001040580	614733	ING5	inhibitor of growth family member 5 (ING5), mRNA.	0	13	13	2	0	2	1	0	1	3	13	16	0	0	0	0	0	0	0	0	0	0	16	#N/A	#N/A	#N/A
1136	NM_001046064	510915	OIT3	oncoprotein induced transcript 3 (OIT3), mRNA.	3	12	15	1	0	1	0	0	0	4	12	16	0	0	0	0	0	0	0	0	0	0	16	#N/A	#N/A	#N/A
1305	NM_001046427	538164	DNAL1	dynein axonemal light chain 1 (DNAL1), mRNA.	6	10	16	0	0	0	0	0	0	6	10	16	0	0	0	0	0	0	0	0	0	0	16	#N/A	#N/A	#N/A
1387	NM_001046624	618809	VAT1L	vesicle amine transport 1 like (VAT1L), mRNA.	6	7	13	1	0	1	1	1	2	8	8	16	0	0	0	0	0	0	0	0	0	0	16	3.0868	#N/A	#N/A
1448	NM_001075248	506254	TBC1D21	TBC1 domain family member 21 (TBC1D21), mRNA.	11	2	13	0	0	0	0	3	3	11	5	16	0	0	0	0	0	0	0	0	0	0	16	#N/A	#N/A	#N/A
1541	NM_001075444	510312	STX5	syntaxin 5 (STX5), mRNA.	2	6	8	1	2	3	1	2	3	4	10	14	0	1	1	0	0	0	0	0	0	2	16	#N/A	#N/A	#N/A
1687	NM_001075781	518967	CFAP410	cilia and flagella associated protein 410 (CFAP410), mRNA.	8	0	8	0	4	4	0	2	2	8	6	14	1	0	1	0	0	0	0	0	0	2	16	#N/A	#N/A	#N/A
1835	NM_001076044	534964	INTS7	integrator complex subunit 7 (INTS7), mRNA.	6	9	15	0	0	0	1	0	1	7	9	16	0	0	0	0	0	0	0	0	0	0	16	#N/A	#N/A	#N/A
1949	NM_001076266	541259	CDH10	cadherin 10 (CDH10), mRNA.	0	16	16	0	0	0	0	0	0	0	16	16	0	0	0	0	0	0	0	0	0	0	16	#N/A	1	#N/A
2067	NM_001076488	618021	LCMT1	leucine carboxyl methyltransferase 1 (LCMT1), mRNA.	1	10	11	1	0	1	4	0	4	6	10	16	0	0	0	0	0	0	0	0	0	0	16	#N/A	#N/A	#N/A
2241	NM_001077029	767961	NDUFAF2	NADH:ubiquinone oxidoreductase complex assembly factor 2 (NDUFAF2), mRNA.	8	6	14	0	0	0	0	0	0	8	6	14	0	1	1	0	0	0	0	0	0	2	16	#N/A	#N/A	#N/A
2416	NM_001078058	616066	DAP	death associated protein (DAP), mRNA.	2	10	12	1	0	1	3	0	3	6	10	16	0	0	0	0	0	0	0	0	0	0	16	1.55057	#N/A	#N/A
2560	NM_001080280	518905	SLC20A2	solute carrier family 20 member 2 (SLC20A2), mRNA.	16	0	16	0	0	0	0	0	0	16	0	16	0	0	0	0	0	0	0	0	0	0	16	#N/A	#N/A	#N/A
2580	NM_001080324	616643	TECRL	trans-2,3-enoyl-CoA reductase like (TECRL), mRNA.	0	5	5	0	0	0	9	2	11	9	7	16	0	0	0	0	0	0	0	0	0	0	16	#N/A	#N/A	#N/A
2692	NM_001081745	784375	CNTNAP3	contactin associated protein-like 3 (CNTNAP3), mRNA.	1	3	4	0	0	0	5	7	12	6	10	16	0	0	0	0	0	0	0	0	0	0	16	#N/A	#N/A	#N/A
2788	NM_001083470	533687	RHPN2	rhophilin Rho GTPase binding protein 2 (RHPN2), mRNA.	6	8	14	0	0	0	1	1	2	7	9	16	0	0	0	0	0	0	0	0	0	0	16	3.27691	#N/A	#N/A
2867	NM_001083735	538617	TRIM2	tripartite motif containing 2 (TRIM2), mRNA.	5	8	13	0	1	1	1	1	2	6	10	16	0	0	0	0	0	0	0	0	0	0	16	3.07831	#N/A	#N/A
2927	NM_001097999	508844	MKLN1	muskelin 1 (MKLN1), mRNA.	11	3	14	0	0	0	0	2	2	11	5	16	0	0	0	0	0	0	0	0	0	0	16	#N/A	#N/A	#N/A
3065	NM_001098925	510205	SERPINB10	serpin family B member 10 (SERPINB10), mRNA.	4	10	14	0	0	0	1	1	2	5	11	16	0	0	0	0	0	0	0	0	0	0	16	#N/A	#N/A	#N/A
3125	NM_001099035	526205	GSTCD	glutathione S-transferase C-terminal domain containing (GSTCD), mRNA.	5	9	14	0	0	0	2	0	2	7	9	16	0	0	0	0	0	0	0	0	0	0	16	#N/A	1	#N/A
3188	NM_001099142	615304	CPNE3	copine 3 (CPNE3), mRNA.	13	3	16	0	0	0	0	0	0	13	3	16	0	0	0	0	0	0	0	0	0	0	16	#N/A	#N/A	#N/A
3207	NM_001099191	783785	ROBO4	roundabout guidance receptor 4 (ROBO4), mRNA.	2	10	12	3	0	3	1	0	1	6	10	16	0	0	0	0	0	0	0	0	0	0	16	#N/A	#N/A	#N/A
3243	NM_001099710	527679	MBNL2	muscleblind like splicing regulator 2 (MBNL2), mRNA.	1	13	14	1	0	1	1	0	1	3	13	16	0	0	0	0	0	0	0	0	0	0	16	1.28662	#N/A	#N/A
3255	NM_001099947	529699	ZC3H11A	zinc finger CCCH-type containing 11A (ZC3H11A), mRNA.	10	1	11	0	1	1	1	1	2	11	3	14	0	0	0	0	0	0	0	1	1	2	16	#N/A	#N/A	#N/A
3511	NM_001101967	513067	ARSG	arylsulfatase G (ARSG), mRNA.	6	4	10	0	1	1	0	5	5	6	10	16	0	0	0	0	0	0	0	0	0	0	16	#N/A	#N/A	#N/A
3797	NM_001102534	785152	PRICKLE1	prickle planar cell polarity protein 1 (PRICKLE1), mRNA.	9	7	16	0	0	0	0	0	0	9	7	16	0	0	0	0	0	0	0	0	0	0	16	#N/A	#N/A	#N/A
4038	NM_001105628	536495	ATP10D	ATPase phospholipid transporting 10D (putative) (ATP10D), mRNA.	15	0	15	0	0	0	0	1	1	15	1	16	0	0	0	0	0	0	0	0	0	0	16	-1.90112	#N/A	#N/A
4118	NM_001113242	540516	ERI3	ERI1 exoribonuclease family member 3 (ERI3), transcript variant 1, mRNA.	7	3	10	0	1	1	4	1	5	11	5	16	0	0	0	0	0	0	0	0	0	0	16	#N/A	#N/A	#N/A
4208	NM_001143860	506730	MACF1	microtubule actin crosslinking factor 1 (MACF1), mRNA.	6	9	15	0	0	0	1	0	1	7	9	16	0	0	0	0	0	0	0	0	0	0	16	-1.19558	#N/A	#N/A
4237	NM_001144108	617454	PKNOX2	PBX/knotted 1 homeobox 2 (PKNOX2), mRNA.	5	9	14	1	1	2	0	0	0	6	10	16	0	0	0	0	0	0	0	0	0	0	16	#N/A	#N/A	#N/A
4279	NM_001164022	505453	CREBBP	CREB binding protein (CREBBP), mRNA.	5	5	10	1	0	1	5	0	5	11	5	16	0	0	0	0	0	0	0	0	0	0	16	1.42898	#N/A	#N/A
4367	NM_001191132	503620	FLT1	fms related receptor tyrosine kinase 1 (FLT1), mRNA.	5	6	11	2	2	4	0	1	1	7	9	16	0	0	0	0	0	0	0	0	0	0	16	#N/A	#N/A	#N/A
4392	NM_001191177	783104	HPS3	HPS3 biogenesis of lysosomal organelles complex 2 subunit 1 (HPS3), mRNA.	12	0	12	0	0	0	0	2	2	12	2	14	1	0	1	0	0	0	0	0	0	2	16	#N/A	#N/A	#N/A
4460	NM_001191332	100138038	ARMC10	armadillo repeat containing 10 (ARMC10), mRNA.	6	8	14	0	0	0	1	1	2	7	9	16	0	0	0	0	0	0	0	0	0	0	16	#N/A	#N/A	#N/A
4464	NM_001191337	615335	TP63	tumor protein p63 (TP63), mRNA.	13	1	14	0	0	0	0	2	2	13	3	16	0	0	0	0	0	0	0	0	0	0	16	#N/A	#N/A	#N/A
4763	NM_001192401	515159	GNA12	G protein subunit alpha 12 (GNA12), mRNA.	11	2	13	0	1	1	0	2	2	11	5	16	0	0	0	0	0	0	0	0	0	0	16	1.92563	#N/A	#N/A
4808	NM_001192481	518168	PLXNC1	plexin C1 (PLXNC1), mRNA.	9	6	15	0	0	0	1	0	1	10	6	16	0	0	0	0	0	0	0	0	0	0	16	#N/A	#N/A	#N/A
4985	NM_001192759	533187	BBX	BBX high mobility group box domain containing (BBX), mRNA.	1	8	9	0	0	0	2	5	7	3	13	16	0	0	0	0	0	0	0	0	0	0	16	1.36231	#N/A	#N/A
5012	NM_001192800	534119	DTNB	dystrobrevin beta (DTNB), mRNA.	0	3	3	0	0	0	8	5	13	8	8	16	0	0	0	0	0	0	0	0	0	0	16	#N/A	#N/A	#N/A
5141	NM_001192974	539941	MAPK8	mitogen-activated protein kinase 8 (MAPK8), mRNA.	4	3	7	0	0	0	5	0	5	9	3	12	0	2	2	0	0	0	0	0	0	4	16	#N/A	#N/A	#N/A
5186	NM_001193047	614786	WWTR1	WW domain containing transcription regulator 1 (WWTR1), mRNA.	7	3	10	0	0	0	5	1	6	12	4	16	0	0	0	0	0	0	0	0	0	0	16	1.88696	#N/A	#N/A
5205	NM_001193080	615528	SULT1C3	sulfotransferase family, cytosolic, 1C, member 3 (SULT1C3), mRNA.	0	13	13	2	0	2	1	0	1	3	13	16	0	0	0	0	0	0	0	0	0	0	16	#N/A	1	#N/A
5243	NM_001193137	617007	RAD51B	RAD51 paralog B (RAD51B), mRNA.	6	9	15	0	1	1	0	0	0	6	10	16	0	0	0	0	0	0	0	0	0	0	16	#N/A	#N/A	#N/A
5713	NM_001206011	532871	FOXRED2	FAD dependent oxidoreductase domain containing 2 (FOXRED2), mRNA.	8	0	8	0	3	3	0	5	5	8	8	16	0	0	0	0	0	0	0	0	0	0	16	-2.93798	#N/A	FOXRED2
5773	NM_001206098	536469	WDR7	WD repeat domain 7 (WDR7), mRNA.	6	10	16	0	0	0	0	0	0	6	10	16	0	0	0	0	0	0	0	0	0	0	16	#N/A	#N/A	#N/A
5784	NM_001206117	538360	GRM8	glutamate metabotropic receptor 8 (GRM8), mRNA.	2	14	16	0	0	0	0	0	0	2	14	16	0	0	0	0	0	0	0	0	0	0	16	#N/A	#N/A	#N/A
5934	NM_001206428	527651	WDR25	WD repeat domain 25 (WDR25), mRNA.	6	4	10	0	0	0	1	1	2	7	5	12	0	2	2	0	0	0	0	0	0	4	16	#N/A	#N/A	#N/A
5937	NM_001206442	538123	GPR158	G protein-coupled receptor 158 (GPR158), mRNA.	5	10	15	0	0	0	1	0	1	6	10	16	0	0	0	0	0	0	0	0	0	0	16	#N/A	#N/A	#N/A
5991	NM_001206580	538255	HCN1	hyperpolarization activated cyclic nucleotide gated potassium channel 1 (HCN1), mRNA.	8	7	15	0	0	0	0	1	1	8	8	16	0	0	0	0	0	0	0	0	0	0	16	#N/A	#N/A	#N/A
6113	NM_001206874	535545	SPAG17	sperm associated antigen 17 (SPAG17), mRNA.	6	1	7	0	0	0	0	9	9	6	10	16	0	0	0	0	0	0	0	0	0	0	16	#N/A	#N/A	#N/A
6158	NM_001243311	528907	OTUD4	OTU deubiquitinase 4 (OTUD4), mRNA.	9	0	9	0	2	2	0	5	5	9	7	16	0	0	0	0	0	0	0	0	0	0	16	#N/A	#N/A	#N/A
6204	NM_001256578	529631	RUNX1	RUNX family transcription factor 1 (RUNX1), mRNA.	12	4	16	0	0	0	0	0	0	12	4	16	0	0	0	0	0	0	0	0	0	0	16	#N/A	#N/A	#N/A
6245	NM_001289819	535794	ARNTL2	aryl hydrocarbon receptor nuclear translocator like 2 (ARNTL2), mRNA.	2	13	15	0	0	0	1	0	1	3	13	16	0	0	0	0	0	0	0	0	0	0	16	#N/A	#N/A	#N/A
6621	NM_174419	281975	PDE6C	phosphodiesterase 6C (PDE6C), mRNA.	5	4	9	1	1	2	1	0	1	7	5	12	1	0	1	0	1	1	0	0	0	4	16	#N/A	#N/A	#N/A
6636	NM_174447	282030	RAB3B	RAB3B, member RAS oncogene family (RAB3B), mRNA.	10	1	11	0	1	1	0	4	4	10	6	16	0	0	0	0	0	0	0	0	0	0	16	#N/A	#N/A	#N/A
6704	NM_174585	282323	PRKACB	protein kinase cAMP-activated catalytic subunit beta (PRKACB), mRNA.	8	6	14	0	0	0	1	1	2	9	7	16	0	0	0	0	0	0	0	0	0	0	16	#N/A	#N/A	#N/A
6709	NM_174590	282333	PTPN13	protein tyrosine phosphatase non-receptor type 13 (PTPN13), mRNA.	10	2	12	0	1	1	0	3	3	10	6	16	0	0	0	0	0	0	0	0	0	0	16	2.79363	#N/A	#N/A
6729	NM_174625	282388	TXNRD1	thioredoxin reductase 1 (TXNRD1), mRNA.	2	4	6	2	0	2	0	0	0	4	4	8	0	4	4	0	0	0	0	0	0	8	16	#N/A	#N/A	#N/A
283	NM_001024663	508829	ABCG8	ATP binding cassette subfamily G member 8 (ABCG8), mRNA.	2	7	9	0	0	0	2	0	2	4	7	11	0	2	2	0	0	0	0	0	0	4	15	#N/A	#N/A	#N/A
296	NM_001025336	526133	KCNAB1	potassium voltage-gated channel subfamily A regulatory beta subunit 1 (KCNAB1), mRNA.	3	2	5	0	0	0	8	2	10	11	4	15	0	0	0	0	0	0	0	0	0	0	15	#N/A	#N/A	#N/A
328	NM_001033936	280816	CFH	complement factor H (CFH), mRNA.	6	8	14	1	0	1	0	0	0	7	8	15	0	0	0	0	0	0	0	0	0	0	15	#N/A	#N/A	#N/A
334	NM_001034036	281992	PPARA	peroxisome proliferator activated receptor alpha (PPARA), mRNA.	9	4	13	0	1	1	0	1	1	9	6	15	0	0	0	0	0	0	0	0	0	0	15	#N/A	#N/A	#N/A
486	NM_001034553	525027	PINX1	PIN2 (TERF1) interacting telomerase inhibitor 1 (PINX1), mRNA.	9	1	10	0	1	1	0	4	4	9	6	15	0	0	0	0	0	0	0	0	0	0	15	#N/A	#N/A	#N/A
543	NM_001034660	539084	SLC5A11	solute carrier family 5 member 11 (SLC5A11), mRNA.	1	2	3	0	0	0	4	8	12	5	10	15	0	0	0	0	0	0	0	0	0	0	15	#N/A	#N/A	#N/A
624	NM_001035046	507346	MGST3	microsomal glutathione S-transferase 3 (MGST3), mRNA.	9	0	9	0	2	2	0	4	4	9	6	15	0	0	0	0	0	0	0	0	0	0	15	#N/A	#N/A	#N/A
764	NM_001035460	615081	FAM104A	family with sequence similarity 104 member A (FAM104A), mRNA.	12	0	12	0	2	2	0	1	1	12	3	15	0	0	0	0	0	0	0	0	0	0	15	#N/A	#N/A	#N/A
799	NM_001037465	515515	SYK	spleen associated tyrosine kinase (SYK), mRNA.	12	0	12	0	1	1	0	2	2	12	3	15	0	0	0	0	0	0	0	0	0	0	15	-1.47616	#N/A	#N/A
887	NM_001038117	515350	SPICE1	spindle and centriole associated protein 1 (SPICE1), mRNA.	1	7	8	1	0	1	6	0	6	8	7	15	0	0	0	0	0	0	0	0	0	0	15	#N/A	#N/A	#N/A
1232	NM_001046282	526444	DNAI7	dynein axonemal intermediate chain 7 (DNAI7), mRNA.	9	4	13	0	0	0	0	2	2	9	6	15	0	0	0	0	0	0	0	0	0	0	15	#N/A	#N/A	#N/A
1278	NM_001046363	533964	INTS9	integrator complex subunit 9 (INTS9), mRNA.	7	8	15	0	0	0	0	0	0	7	8	15	0	0	0	0	0	0	0	0	0	0	15	#N/A	#N/A	#N/A
1430	NM_001075207	505563	KCNK1	potassium two pore domain channel subfamily K member 1 (KCNK1), mRNA.	1	5	6	0	0	0	9	0	9	10	5	15	0	0	0	0	0	0	0	0	0	0	15	#N/A	#N/A	#N/A
1626	NM_001075638	513751	DCTN6	dynactin subunit 6 (DCTN6), mRNA.	13	1	14	0	0	0	0	1	1	13	2	15	0	0	0	0	0	0	0	0	0	0	15	#N/A	#N/A	#N/A
1723	NM_001075838	522967	MYO1D	myosin ID (MYO1D), mRNA.	8	7	15	0	0	0	0	0	0	8	7	15	0	0	0	0	0	0	0	0	0	0	15	#N/A	#N/A	#N/A
2028	NM_001076417	616293	ERGIC1	endoplasmic reticulum-golgi intermediate compartment 1 (ERGIC1), mRNA.	5	6	11	0	0	0	0	2	2	5	8	13	0	1	1	0	0	0	0	0	0	2	15	1.08144	#N/A	#N/A
2195	NM_001076944	616979	RAB31	RAB31, member RAS oncogene family (RAB31), mRNA.	8	4	12	0	0	0	1	0	1	9	4	13	0	1	1	0	0	0	0	0	0	2	15	#N/A	#N/A	#N/A
2324	NM_001077882	508782	EOGT	EGF domain specific O-linked N-acetylglucosamine transferase (EOGT), mRNA.	12	3	15	0	0	0	0	0	0	12	3	15	0	0	0	0	0	0	0	0	0	0	15	#N/A	#N/A	#N/A
2345	NM_001077926	515340	ABO	ABO, alpha 1-3-N-acetylgalactosaminyltransferase and alpha 1-3-galactosyltransferase (ABO), mRNA.	2	8	10	1	0	1	1	3	4	4	11	15	0	0	0	0	0	0	0	0	0	0	15	#N/A	#N/A	#N/A
2654	NM_001081599	532421	ZNF567	zinc finger protein 567 (ZNF567), mRNA.	0	13	13	0	0	0	2	0	2	2	13	15	0	0	0	0	0	0	0	0	0	0	15	#N/A	#N/A	#N/A
2683	NM_001081725	530116	DAZL	deleted in azoospermia like (DAZL), mRNA.	4	6	10	2	1	3	1	1	2	7	8	15	0	0	0	0	0	0	0	0	0	0	15	#N/A	#N/A	#N/A
2760	NM_001083415	512490	STXBP3	syntaxin binding protein 3 (STXBP3), mRNA.	1	11	12	0	0	0	1	0	1	2	11	13	0	0	0	0	0	0	1	0	1	2	15	#N/A	1	#N/A
2863	NM_001083723	534327	NHLRC2	NHL repeat containing 2 (NHLRC2), mRNA.	3	4	7	1	0	1	3	0	3	7	4	11	0	2	2	0	0	0	0	0	0	4	15	#N/A	#N/A	#N/A
3129	NM_001099041	528606	EHMT1	euchromatic histone lysine methyltransferase 1 (EHMT1), mRNA.	11	3	14	0	1	1	0	0	0	11	4	15	0	0	0	0	0	0	0	0	0	0	15	#N/A	#N/A	#N/A
3202	NM_001099176	618286	TBC1D14	TBC1 domain family member 14 (TBC1D14), mRNA.	10	3	13	0	0	0	0	2	2	10	5	15	0	0	0	0	0	0	0	0	0	0	15	1.43854	1	#N/A
3248	NM_001099723	618701	LOC618701	uncharacterized LOC618701 (LOC618701), mRNA.	4	3	7	0	3	3	1	0	1	5	6	11	2	0	2	0	0	0	0	0	0	4	15	#N/A	#N/A	#N/A
3290	NM_001100347	512659	MPP7	membrane palmitoylated protein 7 (MPP7), mRNA.	5	9	14	0	1	1	0	0	0	5	10	15	0	0	0	0	0	0	0	0	0	0	15	#N/A	#N/A	#N/A
3306	NM_001100382	519181	FCSK	fucose kinase (FCSK), mRNA.	12	0	12	0	0	0	0	3	3	12	3	15	0	0	0	0	0	0	0	0	0	0	15	#N/A	#N/A	#N/A
3380	NM_001101170	537433	SOBP	sine oculis binding protein homolog (SOBP), mRNA.	4	9	13	1	0	1	1	0	1	6	9	15	0	0	0	0	0	0	0	0	0	0	15	#N/A	#N/A	#N/A
3475	NM_001101885	507518	EXOC6	exocyst complex component 6 (EXOC6), mRNA.	3	11	14	0	0	0	1	0	1	4	11	15	0	0	0	0	0	0	0	0	0	0	15	#N/A	#N/A	#N/A
3509	NM_001101964	512854	MTA3	metastasis associated 1 family member 3 (MTA3), mRNA.	3	10	13	0	0	0	2	0	2	5	10	15	0	0	0	0	0	0	0	0	0	0	15	#N/A	#N/A	#N/A
3533	NM_001102001	514554	PLD1	phospholipase D1, phosphatidylcholine-specific (PLD1), mRNA.	0	13	13	0	0	0	2	0	2	2	13	15	0	0	0	0	0	0	0	0	0	0	15	#N/A	#N/A	#N/A
3582	NM_001102076	523174	PRMT3	protein arginine methyltransferase 3 (PRMT3), mRNA.	7	3	10	0	0	0	1	4	5	8	7	15	0	0	0	0	0	0	0	0	0	0	15	#N/A	#N/A	#N/A
3613	NM_001102123	529395	USP3	ubiquitin specific peptidase 3 (USP3), mRNA.	11	1	12	0	0	0	1	2	3	12	3	15	0	0	0	0	0	0	0	0	0	0	15	1.31173	#N/A	#N/A
3685	NM_001102243	540450	CYTIP	cytohesin 1 interacting protein (CYTIP), mRNA.	1	12	13	0	0	0	0	2	2	1	14	15	0	0	0	0	0	0	0	0	0	0	15	1.64598	#N/A	#N/A
3708	NM_001102280	614517	GAS7	growth arrest specific 7 (GAS7), mRNA.	4	9	13	2	0	2	0	0	0	6	9	15	0	0	0	0	0	0	0	0	0	0	15	-1.75689	#N/A	#N/A
3840	NM_001103255	519857	PRDM6	PR/SET domain 6 (PRDM6), mRNA.	4	7	11	1	0	1	3	0	3	8	7	15	0	0	0	0	0	0	0	0	0	0	15	#N/A	#N/A	#N/A
3919	NM_001105001	614840	GAS2	growth arrest specific 2 (GAS2), mRNA.	2	9	11	0	0	0	2	2	4	4	11	15	0	0	0	0	0	0	0	0	0	0	15	#N/A	#N/A	#N/A
3927	NM_001105023	789755	CD300LB	CD300 molecule-like family member b (CD300LB), mRNA.	6	6	12	0	2	2	1	0	1	7	8	15	0	0	0	0	0	0	0	0	0	0	15	#N/A	#N/A	#N/A
4073	NM_001110001	541140	KRAS	KRAS proto-oncogene, GTPase (KRAS), mRNA.	7	2	9	0	2	2	1	3	4	8	7	15	0	0	0	0	0	0	0	0	0	0	15	1.49786	#N/A	#N/A
4214	NM_001143870	514313	PACS1	phosphofurin acidic cluster sorting protein 1 (PACS1), mRNA.	10	4	14	0	0	0	0	1	1	10	5	15	0	0	0	0	0	0	0	0	0	0	15	#N/A	#N/A	#N/A
4454	NM_001191316	520774	PHTF2	putative homeodomain transcription factor 2 (PHTF2), mRNA.	12	2	14	0	0	0	1	0	1	13	2	15	0	0	0	0	0	0	0	0	0	0	15	#N/A	#N/A	#N/A
4710	NM_001192288	539650	IGF2BP3	insulin like growth factor 2 mRNA binding protein 3 (IGF2BP3), mRNA.	0	6	6	0	0	0	6	3	9	6	9	15	0	0	0	0	0	0	0	0	0	0	15	#N/A	#N/A	#N/A
4713	NM_001192301	511754	CDK6	cyclin dependent kinase 6 (CDK6), mRNA.	9	5	14	0	0	0	0	1	1	9	6	15	0	0	0	0	0	0	0	0	0	0	15	#N/A	#N/A	#N/A
4764	NM_001192402	515187	CTNND1	catenin delta 1 (CTNND1), mRNA.	5	4	9	1	0	1	3	2	5	9	6	15	0	0	0	0	0	0	0	0	0	0	15	1.90476	#N/A	#N/A
4944	NM_001192699	530659	LEMD3	LEM domain containing 3 (LEMD3), mRNA.	10	0	10	0	1	1	0	4	4	10	5	15	0	0	0	0	0	0	0	0	0	0	15	#N/A	#N/A	#N/A
4961	NM_001192728	511049	GSG1L	GSG1 like (GSG1L), mRNA.	4	2	6	0	0	0	2	7	9	6	9	15	0	0	0	0	0	0	0	0	0	0	15	#N/A	#N/A	#N/A
5089	NM_001192903	537314	CARMIL1	capping protein regulator and myosin 1 linker 1 (CARMIL1), mRNA.	5	9	14	0	0	0	1	0	1	6	9	15	0	0	0	0	0	0	0	0	0	0	15	2.44928	#N/A	#N/A
5118	NM_001192943	522221	TTLL7	tubulin tyrosine ligase like 7 (TTLL7), mRNA.	2	9	11	1	0	1	3	0	3	6	9	15	0	0	0	0	0	0	0	0	0	0	15	#N/A	#N/A	#N/A
5204	NM_001193079	615508	TPRG1	tumor protein p63 regulated 1 (TPRG1), mRNA.	2	12	14	1	0	1	0	0	0	3	12	15	0	0	0	0	0	0	0	0	0	0	15	#N/A	#N/A	#N/A
5288	NM_001193218	529590	SCN1A	sodium voltage-gated channel alpha subunit 1 (SCN1A), mRNA.	2	3	5	1	0	1	1	0	1	4	3	7	0	2	2	2	0	2	0	0	0	8	15	#N/A	#N/A	#N/A
5363	NM_001205393	510095	TASOR	transcription activation suppressor (TASOR), mRNA.	3	8	11	2	0	2	0	2	2	5	10	15	0	0	0	0	0	0	0	0	0	0	15	#N/A	#N/A	#N/A
5372	NM_001205418	535498	BAZ2B	bromodomain adjacent to zinc finger domain 2B (BAZ2B), mRNA.	5	10	15	0	0	0	0	0	0	5	10	15	0	0	0	0	0	0	0	0	0	0	15	2.39784	#N/A	#N/A
5379	NM_001205426	782848	VIRMA	vir like m6A methyltransferase associated (VIRMA), mRNA.	0	5	5	0	0	0	9	1	10	9	6	15	0	0	0	0	0	0	0	0	0	0	15	#N/A	#N/A	VIRMA
5449	NM_001205538	538447	PRKD3	protein kinase D3 (PRKD3), mRNA.	0	12	12	0	0	0	3	0	3	3	12	15	0	0	0	0	0	0	0	0	0	0	15	-1.51455	#N/A	#N/A
5493	NM_001205631	508204	GREB1	growth regulating estrogen receptor binding 1 (GREB1), mRNA.	3	10	13	1	0	1	1	0	1	5	10	15	0	0	0	0	0	0	0	0	0	0	15	#N/A	#N/A	#N/A
5505	NM_001205650	539275	CHD9	chromodomain helicase DNA binding protein 9 (CHD9), mRNA.	3	7	10	1	0	1	0	4	4	4	11	15	0	0	0	0	0	0	0	0	0	0	15	#N/A	#N/A	#N/A
5559	NM_001205762	513610	MED23	mediator complex subunit 23 (MED23), mRNA.	5	4	9	0	1	1	0	1	1	5	6	11	0	2	2	0	0	0	0	0	0	4	15	#N/A	#N/A	#N/A
5728	NM_001206038	540873	DAPK1	death associated protein kinase 1 (DAPK1), mRNA.	3	12	15	0	0	0	0	0	0	3	12	15	0	0	0	0	0	0	0	0	0	0	15	#N/A	#N/A	#N/A
5976	NM_001206539	533188	CD2AP	CD2 associated protein (CD2AP), mRNA.	7	1	8	0	1	1	0	6	6	7	8	15	0	0	0	0	0	0	0	0	0	0	15	1.173	#N/A	#N/A
6082	NM_001206810	100335468	TSPEAR	thrombospondin-type laminin G domain and EAR repeats (TSPEAR), mRNA.	5	7	12	1	0	1	1	1	2	7	8	15	0	0	0	0	0	0	0	0	0	0	15	#N/A	#N/A	#N/A
6310	NM_001354175	534106	ADAP2	ArfGAP with dual PH domains 2 (ADAP2), mRNA.	1	10	11	1	0	1	1	0	1	3	10	13	0	1	1	0	0	0	0	0	0	2	15	#N/A	#N/A	#N/A
6373	NM_173943	280878	NNT	nicotinamide nucleotide transhydrogenase (NNT), mRNA; nuclear gene for mitochondrial product.	10	3	13	0	0	0	0	0	0	10	3	13	0	1	1	0	0	0	0	0	0	2	15	-1.31514	#N/A	#N/A
6406	NM_174013	281057	CD44	CD44 molecule (CD44), mRNA.	4	10	14	0	1	1	0	0	0	4	11	15	0	0	0	0	0	0	0	0	0	0	15	-1.01367	#N/A	#N/A
6421	NM_174047	281136	LPAR1	lysophosphatidic acid receptor 1 (LPAR1), mRNA.	2	11	13	1	0	1	0	1	1	3	12	15	0	0	0	0	0	0	0	0	0	0	15	#N/A	#N/A	#N/A
6872	NM_176648	338052	CAPZB	capping actin protein of muscle Z-line subunit beta (CAPZB), mRNA.	1	8	9	4	0	4	2	0	2	7	8	15	0	0	0	0	0	0	0	0	0	0	15	#N/A	#N/A	#N/A
35	NM_001002882	444859	ST3GAL3	ST3 beta-galactoside alpha-2,3-sialyltransferase 3 (ST3GAL3), mRNA.	4	4	8	0	0	0	3	3	6	7	7	14	0	0	0	0	0	0	0	0	0	0	14	#N/A	#N/A	#N/A
220	NM_001015669	538990	BRINP1	BMP/retinoic acid inducible neural specific 1 (BRINP1), mRNA.	8	4	12	1	1	2	0	0	0	9	5	14	0	0	0	0	0	0	0	0	0	0	14	#N/A	#N/A	#N/A
308	NM_001031758	517979	EDC3	enhancer of mRNA decapping 3 (EDC3), mRNA.	0	14	14	0	0	0	0	0	0	0	14	14	0	0	0	0	0	0	0	0	0	0	14	#N/A	#N/A	#N/A
312	NM_001031767	533992	DRAM1	DNA damage regulated autophagy modulator 1 (DRAM1), mRNA.	3	7	10	0	0	0	0	0	0	3	7	10	0	2	2	0	0	0	0	0	0	4	14	#N/A	#N/A	#N/A
367	NM_001034250	505568	EXOC7	exocyst complex component 7 (EXOC7), mRNA.	8	4	12	0	0	0	0	0	0	8	4	12	0	0	0	0	1	1	0	0	0	2	14	#N/A	#N/A	#N/A
481	NM_001034539	521254	BPNT1	3'(2'), 5'-bisphosphate nucleotidase 1 (BPNT1), mRNA.	5	7	12	0	0	0	1	1	2	6	8	14	0	0	0	0	0	0	0	0	0	0	14	#N/A	#N/A	#N/A
502	NM_001034583	533007	COG4	component of oligomeric golgi complex 4 (COG4), mRNA.	12	0	12	0	1	1	0	1	1	12	2	14	0	0	0	0	0	0	0	0	0	0	14	#N/A	#N/A	#N/A
721	NM_001035374	528555	CASQ2	calsequestrin 2 (CASQ2), mRNA.	1	8	9	0	0	0	5	0	5	6	8	14	0	0	0	0	0	0	0	0	0	0	14	#N/A	#N/A	#N/A
877	NM_001038098	513539	LIMK2	LIM domain kinase 2 (LIMK2), mRNA.	1	13	14	0	0	0	0	0	0	1	13	14	0	0	0	0	0	0	0	0	0	0	14	2.47711	#N/A	#N/A
909	NM_001038157	533230	ZNF330	zinc finger protein 330 (ZNF330), mRNA.	9	1	10	0	1	1	0	3	3	9	5	14	0	0	0	0	0	0	0	0	0	0	14	#N/A	#N/A	#N/A
911	NM_001038161	534637	DISP1	dispatched RND transporter family member 1 (DISP1), mRNA.	7	6	13	0	0	0	0	1	1	7	7	14	0	0	0	0	0	0	0	0	0	0	14	#N/A	#N/A	#N/A
936	NM_001038215	616567	CMSS1	cms1 ribosomal small subunit homolog (CMSS1), mRNA.	8	5	13	0	0	0	0	1	1	8	6	14	0	0	0	0	0	0	0	0	0	0	14	#N/A	#N/A	#N/A
992	NM_001040476	281546	TRAM1	translocation associated membrane protein 1 (TRAM1), mRNA.	3	3	6	1	0	1	4	1	5	8	4	12	0	1	1	0	0	0	0	0	0	2	14	#N/A	#N/A	TRAM1
1091	NM_001045979	507749	C6	complement C6 (C6), mRNA.	3	6	9	1	0	1	2	0	2	6	6	12	0	1	1	0	0	0	0	0	0	2	14	#N/A	#N/A	#N/A
1213	NM_001046238	518313	ELAPOR2	endosome-lysosome associated apoptosis and autophagy regulator family member 2 (ELAPOR2), mRNA.	4	2	6	0	0	0	2	6	8	6	8	14	0	0	0	0	0	0	0	0	0	0	14	#N/A	#N/A	#N/A
1290	NM_001046393	535023	FAM107B	family with sequence similarity 107 member B (FAM107B), mRNA.	3	11	14	0	0	0	0	0	0	3	11	14	0	0	0	0	0	0	0	0	0	0	14	#N/A	#N/A	#N/A
1362	NM_001046559	615492	SMG9	SMG9 nonsense mediated mRNA decay factor (SMG9), mRNA.	9	2	11	0	0	0	0	3	3	9	5	14	0	0	0	0	0	0	0	0	0	0	14	#N/A	#N/A	#N/A
1450	NM_001075250	506270	PTK2	PTK2 protein tyrosine kinase 2 (PTK2), mRNA.	5	9	14	0	0	0	0	0	0	5	9	14	0	0	0	0	0	0	0	0	0	0	14	1.7207	#N/A	#N/A
1546	NM_001075463	510749	PANK3	pantothenate kinase 3 (PANK3), mRNA.	9	0	9	0	1	1	0	4	4	9	5	14	0	0	0	0	0	0	0	0	0	0	14	2.15912	#N/A	#N/A
1717	NM_001075832	522462	EFHD1	EF-hand domain family member D1 (EFHD1), mRNA.	12	0	12	0	0	0	0	2	2	12	2	14	0	0	0	0	0	0	0	0	0	0	14	3.12146	#N/A	#N/A
1767	NM_001075927	529881	C20H5orf22	chromosome 20 C5orf22 homolog (C20H5orf22), mRNA.	0	5	5	0	0	0	9	0	9	9	5	14	0	0	0	0	0	0	0	0	0	0	14	#N/A	#N/A	#N/A
1800	NM_001075990	533348	PAAF1	proteasomal ATPase associated factor 1 (PAAF1), mRNA.	0	5	5	2	0	2	1	0	1	3	5	8	0	1	1	1	0	1	0	1	1	6	14	#N/A	#N/A	#N/A
1959	NM_001076284	613725	PCBP3	poly(rC) binding protein 3 (PCBP3), mRNA.	5	8	13	0	0	0	0	1	1	5	9	14	0	0	0	0	0	0	0	0	0	0	14	#N/A	#N/A	#N/A
1980	NM_001076324	614380	SLC22A16	solute carrier family 22 member 16 (SLC22A16), mRNA.	9	3	12	0	0	0	1	1	2	10	4	14	0	0	0	0	0	0	0	0	0	0	14	#N/A	#N/A	SLC22A16
2095	NM_001076796	280722	APP	amyloid beta precursor protein (APP), mRNA.	2	12	14	0	0	0	0	0	0	2	12	14	0	0	0	0	0	0	0	0	0	0	14	-2.19841	#N/A	#N/A
2105	NM_001076807	505605	LRRC8A	leucine rich repeat containing 8 VRAC subunit A (LRRC8A), mRNA.	0	8	8	0	0	0	0	0	0	0	8	8	0	3	3	0	0	0	0	0	0	6	14	#N/A	#N/A	#N/A
2305	NM_001077843	504317	LRP4	LDL receptor related protein 4 (LRP4), mRNA.	5	3	8	0	0	0	1	5	6	6	8	14	0	0	0	0	0	0	0	0	0	0	14	#N/A	#N/A	#N/A
2426	NM_001078076	617428	ACAD9	acyl-CoA dehydrogenase family member 9 (ACAD9), mRNA; nuclear gene for mitochondrial product.	3	11	14	0	0	0	0	0	0	3	11	14	0	0	0	0	0	0	0	0	0	0	14	#N/A	#N/A	#N/A
2453	NM_001078130	768315	C2CD3	C2 domain containing 3 centriole elongation regulator (C2CD3), mRNA.	11	0	11	0	0	0	0	3	3	11	3	14	0	0	0	0	0	0	0	0	0	0	14	#N/A	#N/A	#N/A
2484	NM_001079602	528379	LIN7A	lin-7 homolog A, crumbs cell polarity complex component (LIN7A), mRNA.	9	3	12	0	0	0	0	0	0	9	3	12	0	1	1	0	0	0	0	0	0	2	14	3.47032	#N/A	LIN7A
2524	NM_001080219	286869	CHI3L1	chitinase 3 like 1 (CHI3L1), mRNA.	10	0	10	0	0	0	0	2	2	10	2	12	0	0	0	0	0	0	0	1	1	2	14	#N/A	#N/A	CHI3L1
2653	NM_001081597	531343	MLPH	melanophilin (MLPH), mRNA.	9	5	14	0	0	0	0	0	0	9	5	14	0	0	0	0	0	0	0	0	0	0	14	#N/A	#N/A	#N/A
2775	NM_001083447	525034	KRT74	keratin 74 (KRT74), mRNA.	5	0	5	0	0	0	0	3	3	5	3	8	2	0	2	0	0	0	0	1	1	6	14	#N/A	#N/A	#N/A
2980	NM_001098094	538499	OLFM3	olfactomedin 3 (OLFM3), mRNA.	4	6	10	0	0	0	0	0	0	4	6	10	2	0	2	0	0	0	0	0	0	4	14	#N/A	#N/A	OLFM3
3020	NM_001098160	785942	SEMA4D	semaphorin 4D (SEMA4D), mRNA.	11	3	14	0	0	0	0	0	0	11	3	14	0	0	0	0	0	0	0	0	0	0	14	#N/A	#N/A	#N/A
3023	NM_001098166	100048949	ADAM3A	ADAM metallopeptidase domain 3A (cyritestin 1) (ADAM3A), mRNA.	2	2	4	0	1	1	6	3	9	8	6	14	0	0	0	0	0	0	0	0	0	0	14	#N/A	#N/A	#N/A
3136	NM_001099053	532684	LOXL2	lysyl oxidase like 2 (LOXL2), mRNA.	0	1	1	0	0	0	12	1	13	12	2	14	0	0	0	0	0	0	0	0	0	0	14	#N/A	#N/A	#N/A
3138	NM_001099056	533145	PHLDB3	pleckstrin homology like domain family B member 3 (PHLDB3), mRNA.	5	5	10	1	1	2	2	0	2	8	6	14	0	0	0	0	0	0	0	0	0	0	14	#N/A	#N/A	#N/A
3176	NM_001099119	541288	CHMP7	charged multivesicular body protein 7 (CHMP7), mRNA.	11	0	11	0	0	0	0	3	3	11	3	14	0	0	0	0	0	0	0	0	0	0	14	#N/A	#N/A	#N/A
3192	NM_001099151	616131	LHFPL2	LHFPL tetraspan subfamily member 2 (LHFPL2), mRNA.	0	7	7	1	0	1	6	0	6	7	7	14	0	0	0	0	0	0	0	0	0	0	14	-2.29532	#N/A	#N/A
3236	NM_001099700	508491	CSTF3	cleavage stimulation factor subunit 3 (CSTF3), mRNA.	9	5	14	0	0	0	0	0	0	9	5	14	0	0	0	0	0	0	0	0	0	0	14	#N/A	#N/A	#N/A
3304	NM_001100377	517886	DCLRE1C	DNA cross-link repair 1C (DCLRE1C), mRNA.	9	0	9	0	0	0	2	1	3	11	1	12	1	0	1	0	0	0	0	0	0	2	14	#N/A	#N/A	#N/A
3508	NM_001101962	512715	TUBE1	tubulin epsilon 1 (TUBE1), mRNA.	0	6	6	2	0	2	6	0	6	8	6	14	0	0	0	0	0	0	0	0	0	0	14	#N/A	#N/A	#N/A
3620	NM_001102136	531367	NXN	nucleoredoxin (NXN), mRNA.	7	6	13	0	0	0	1	0	1	8	6	14	0	0	0	0	0	0	0	0	0	0	14	2.34321	#N/A	#N/A
3895	NM_001104961	326579	BZW2	basic leucine zipper and W2 domains 2 (BZW2), mRNA.	5	7	12	0	1	1	1	0	1	6	8	14	0	0	0	0	0	0	0	0	0	0	14	#N/A	#N/A	#N/A
4081	NM_001110078	522840	C25H7orf50	chromosome 25 C7orf50 homolog (C25H7orf50), mRNA.	13	1	14	0	0	0	0	0	0	13	1	14	0	0	0	0	0	0	0	0	0	0	14	2.20316	#N/A	#N/A
4339	NM_001167932	533656	VDR	vitamin D receptor (VDR), mRNA.	1	12	13	0	0	0	1	0	1	2	12	14	0	0	0	0	0	0	0	0	0	0	14	2.01645	1	#N/A
4350	NM_001172594	282146	ATP2B4	ATPase plasma membrane Ca2+ transporting 4 (ATP2B4), mRNA.	5	3	8	0	2	2	0	0	0	5	5	10	1	1	2	0	0	0	0	0	0	4	14	-2.02542	#N/A	#N/A
4379	NM_001191156	516477	WDR20	WD repeat domain 20 (WDR20), mRNA.	1	6	7	1	0	1	4	0	4	6	6	12	0	1	1	0	0	0	0	0	0	2	14	#N/A	#N/A	#N/A
4478	NM_001191357	100138309	SYN3	synapsin III (SYN3), mRNA.	6	6	12	0	0	0	1	1	2	7	7	14	0	0	0	0	0	0	0	0	0	0	14	#N/A	#N/A	#N/A
4580	NM_001192024	504429	MERTK	MER proto-oncogene, tyrosine kinase (MERTK), mRNA.	9	5	14	0	0	0	0	0	0	9	5	14	0	0	0	0	0	0	0	0	0	0	14	-2.51033	#N/A	#N/A
4704	NM_001192276	526027	SPTBN1	spectrin beta, non-erythrocytic 1 (SPTBN1), mRNA.	2	10	12	1	0	1	1	0	1	4	10	14	0	0	0	0	0	0	0	0	0	0	14	#N/A	#N/A	#N/A
4728	NM_001192326	512590	RECQL5	RecQ like helicase 5 (RECQL5), mRNA.	10	4	14	0	0	0	0	0	0	10	4	14	0	0	0	0	0	0	0	0	0	0	14	#N/A	#N/A	#N/A
4744	NM_001192352	540052	MUSK	muscle associated receptor tyrosine kinase (MUSK), mRNA.	8	5	13	0	0	0	1	0	1	9	5	14	0	0	0	0	0	0	0	0	0	0	14	#N/A	#N/A	#N/A
4747	NM_001192356	513707	IPO7	importin 7 (IPO7), mRNA.	13	0	13	0	0	0	0	1	1	13	1	14	0	0	0	0	0	0	0	0	0	0	14	#N/A	1	#N/A
4751	NM_001192362	514193	FILIP1	filamin A interacting protein 1 (FILIP1), mRNA.	11	2	13	0	0	0	0	1	1	11	3	14	0	0	0	0	0	0	0	0	0	0	14	#N/A	#N/A	#N/A
4759	NM_001192388	514870	WDR3	WD repeat domain 3 (WDR3), mRNA.	3	0	3	0	0	0	1	10	11	4	10	14	0	0	0	0	0	0	0	0	0	0	14	#N/A	#N/A	#N/A
4904	NM_001192631	526515	ODAD2	outer dynein arm docking complex subunit 2 (ODAD2), mRNA.	6	6	12	1	0	1	0	1	1	7	7	14	0	0	0	0	0	0	0	0	0	0	14	#N/A	#N/A	#N/A
4945	NM_001192700	530939	IGSF3	immunoglobulin superfamily, member 3 (IGSF3), mRNA.	4	2	6	0	1	1	2	5	7	6	8	14	0	0	0	0	0	0	0	0	0	0	14	#N/A	#N/A	#N/A
4971	NM_001192741	532829	LPAR3	lysophosphatidic acid receptor 3 (LPAR3), mRNA.	10	1	11	0	0	0	0	3	3	10	4	14	0	0	0	0	0	0	0	0	0	0	14	#N/A	#N/A	#N/A
4986	NM_001192760	540657	GABRB2	gamma-aminobutyric acid type A receptor subunit beta2 (GABRB2), mRNA.	0	1	1	0	0	0	8	5	13	8	6	14	0	0	0	0	0	0	0	0	0	0	14	#N/A	#N/A	#N/A
5021	NM_001192812	541028	UCK2	uridine-cytidine kinase 2 (UCK2), mRNA.	6	7	13	0	0	0	1	0	1	7	7	14	0	0	0	0	0	0	0	0	0	0	14	#N/A	#N/A	#N/A
5314	NM_001193258	534455	RNF216	ring finger protein 216 (RNF216), mRNA.	11	1	12	0	0	0	0	2	2	11	3	14	0	0	0	0	0	0	0	0	0	0	14	#N/A	#N/A	#N/A
5494	NM_001205633	508259	SIDT1	SID1 transmembrane family member 1 (SIDT1), mRNA.	2	2	4	0	0	0	3	7	10	5	9	14	0	0	0	0	0	0	0	0	0	0	14	#N/A	#N/A	#N/A
5504	NM_001205646	508840	FNDC3A	fibronectin type III domain containing 3A (FNDC3A), mRNA.	7	7	14	0	0	0	0	0	0	7	7	14	0	0	0	0	0	0	0	0	0	0	14	1.73351	#N/A	#N/A
5523	NM_001205687	511010	PTPN3	protein tyrosine phosphatase non-receptor type 3 (PTPN3), mRNA.	1	6	7	0	0	0	1	0	1	2	6	8	0	2	2	0	0	0	1	0	1	6	14	#N/A	#N/A	#N/A
5684	NM_001205968	529876	WDR37	WD repeat domain 37 (WDR37), mRNA.	6	6	12	0	1	1	0	1	1	6	8	14	0	0	0	0	0	0	0	0	0	0	14	#N/A	#N/A	#N/A
5735	NM_001206047	517948	PIK3CB	phosphatidylinositol-4,5-bisphosphate 3-kinase catalytic subunit beta (PIK3CB), mRNA.	7	4	11	0	1	1	1	1	2	8	6	14	0	0	0	0	0	0	0	0	0	0	14	#N/A	#N/A	#N/A
5797	NM_001206135	533538	SGMS1	sphingomyelin synthase 1 (SGMS1), mRNA.	10	4	14	0	0	0	0	0	0	10	4	14	0	0	0	0	0	0	0	0	0	0	14	-1.34021	#N/A	#N/A
5868	NM_001206250	615606	AK8	adenylate kinase 8 (AK8), mRNA.	9	5	14	0	0	0	0	0	0	9	5	14	0	0	0	0	0	0	0	0	0	0	14	#N/A	#N/A	#N/A
6093	NM_001206827	535975	UST	uronyl 2-sulfotransferase (UST), transcript variant 2, mRNA.	6	7	13	0	0	0	0	1	1	6	8	14	0	0	0	0	0	0	0	0	0	0	14	#N/A	#N/A	#N/A
6635	NM_174444	282021	PTGIS	prostaglandin I2 synthase (PTGIS), mRNA.	0	13	13	0	1	1	0	0	0	0	14	14	0	0	0	0	0	0	0	0	0	0	14	#N/A	#N/A	#N/A
6757	NM_174686	282590	KCNK2	potassium two pore domain channel subfamily K member 2 (KCNK2), mRNA.	8	6	14	0	0	0	0	0	0	8	6	14	0	0	0	0	0	0	0	0	0	0	14	#N/A	#N/A	#N/A
6812	NM_174802	286881	BPIFA2B	BPI fold containing family A, member 2B (BPIFA2B), mRNA.	0	4	4	0	0	0	6	0	6	6	4	10	0	0	0	0	0	0	2	0	2	4	14	#N/A	#N/A	#N/A
6959	NM_203358	281777	GAP43	growth associated protein 43 (GAP43), mRNA.	7	1	8	0	0	0	2	4	6	9	5	14	0	0	0	0	0	0	0	0	0	0	14	#N/A	#N/A	#N/A
6980	NM_205812	404169	PKIG	cAMP-dependent protein kinase inhibitor gamma (PKIG), mRNA.	3	9	12	0	0	0	0	0	0	3	9	12	0	1	1	0	0	0	0	0	0	2	14	#N/A	#N/A	#N/A
42	NM_001003904	445423	FANK1	fibronectin type III and ankyrin repeat domains 1 (FANK1), mRNA.	2	9	11	1	0	1	0	1	1	3	10	13	0	0	0	0	0	0	0	0	0	0	13	#N/A	#N/A	#N/A
163	NM_001015549	508717	ABHD2	abhydrolase domain containing 2, acylglycerol lipase (ABHD2), mRNA.	12	1	13	0	0	0	0	0	0	12	1	13	0	0	0	0	0	0	0	0	0	0	13	#N/A	#N/A	#N/A
175	NM_001015574	511375	SFXN1	sideroflexin 1 (SFXN1), mRNA.	0	3	3	0	0	0	9	1	10	9	4	13	0	0	0	0	0	0	0	0	0	0	13	#N/A	#N/A	#N/A
252	NM_001024505	509821	ELMO1	engulfment and cell motility 1 (ELMO1), transcript variant 2, mRNA.	4	2	6	0	0	0	5	2	7	9	4	13	0	0	0	0	0	0	0	0	0	0	13	#N/A	#N/A	#N/A
304	NM_001031751	282879	HGF	hepatocyte growth factor (HGF), mRNA.	7	4	11	0	0	0	2	0	2	9	4	13	0	0	0	0	0	0	0	0	0	0	13	#N/A	#N/A	#N/A
539	NM_001034651	538801	SEPTIN4	septin 4 (SEPTIN4), mRNA.	0	5	5	1	0	1	1	0	1	2	5	7	1	1	2	0	0	0	0	1	1	6	13	#N/A	#N/A	#N/A
609	NM_001035020	505328	OSBPL2	oxysterol binding protein like 2 (OSBPL2), mRNA.	0	9	9	0	0	0	3	1	4	3	10	13	0	0	0	0	0	0	0	0	0	0	13	#N/A	#N/A	#N/A
642	NM_001035079	509823	PALMD	palmdelphin (PALMD), mRNA.	8	4	12	0	1	1	0	0	0	8	5	13	0	0	0	0	0	0	0	0	0	0	13	-3.34879	#N/A	#N/A
643	NM_001035080	509960	MTF1	metal regulatory transcription factor 1 (MTF1), mRNA.	2	11	13	0	0	0	0	0	0	2	11	13	0	0	0	0	0	0	0	0	0	0	13	#N/A	#N/A	#N/A
709	NM_001035348	523885	TMEM135	transmembrane protein 135 (TMEM135), mRNA.	6	5	11	0	0	0	0	0	0	6	5	11	1	0	1	0	0	0	0	0	0	2	13	#N/A	#N/A	#N/A
740	NM_001035412	535449	MTFR1	mitochondrial fission regulator 1 (MTFR1), mRNA; nuclear gene for mitochondrial product.	2	6	8	1	0	1	0	0	0	3	6	9	2	0	2	0	0	0	0	0	0	4	13	#N/A	#N/A	#N/A
910	NM_001038159	533608	CYB5R4	cytochrome b5 reductase 4 (CYB5R4), mRNA.	1	0	1	0	3	3	1	8	9	2	11	13	0	0	0	0	0	0	0	0	0	0	13	#N/A	#N/A	#N/A
1087	NM_001045970	507481	CASP8	caspase 8 (CASP8), mRNA.	1	0	1	0	2	2	0	4	4	1	6	7	0	0	0	0	0	0	0	3	3	6	13	#N/A	#N/A	#N/A
1739	NM_001075868	525329	NCOA4	nuclear receptor coactivator 4 (NCOA4), mRNA.	10	2	12	0	0	0	0	1	1	10	3	13	0	0	0	0	0	0	0	0	0	0	13	2.2815	1	#N/A
1831	NM_001076038	534718	STXBP6	syntaxin binding protein 6 (STXBP6), mRNA.	6	7	13	0	0	0	0	0	0	6	7	13	0	0	0	0	0	0	0	0	0	0	13	#N/A	#N/A	#N/A
1868	NM_001076101	538354	TMEFF2	transmembrane protein with EGF like and two follistatin like domains 2 (TMEFF2), mRNA.	1	2	3	1	2	3	2	5	7	4	9	13	0	0	0	0	0	0	0	0	0	0	13	#N/A	#N/A	#N/A
1894	NM_001076153	539311	PPP1R9A	protein phosphatase 1 regulatory subunit 9A (PPP1R9A), mRNA.	7	3	10	0	1	1	0	2	2	7	6	13	0	0	0	0	0	0	0	0	0	0	13	-2.49556	#N/A	#N/A
1898	NM_001076158	539387	MPZL1	myelin protein zero like 1 (MPZL1), mRNA.	1	6	7	0	0	0	0	0	0	1	6	7	0	3	3	0	0	0	0	0	0	6	13	#N/A	#N/A	#N/A
2178	NM_001076921	540003	IGSF11	immunoglobulin superfamily member 11 (IGSF11), mRNA.	1	1	2	0	0	0	4	7	11	5	8	13	0	0	0	0	0	0	0	0	0	0	13	#N/A	#N/A	#N/A
2182	NM_001076927	540802	ASB3	ankyrin repeat and SOCS box containing 3 (ASB3), mRNA.	5	8	13	0	0	0	0	0	0	5	8	13	0	0	0	0	0	0	0	0	0	0	13	#N/A	#N/A	#N/A
2398	NM_001078012	537684	MYT1L	myelin transcription factor 1 like (MYT1L), mRNA.	7	5	12	0	1	1	0	0	0	7	6	13	0	0	0	0	0	0	0	0	0	0	13	#N/A	#N/A	#N/A
2699	NM_001082431	510909	STX6	syntaxin 6 (STX6), mRNA.	5	4	9	0	0	0	1	3	4	6	7	13	0	0	0	0	0	0	0	0	0	0	13	1.38121	#N/A	#N/A
2825	NM_001083644	505926	BCAT1	branched chain amino acid transaminase 1 (BCAT1), mRNA.	1	11	12	1	0	1	0	0	0	2	11	13	0	0	0	0	0	0	0	0	0	0	13	-2.23135	#N/A	#N/A
2884	NM_001083761	613856	LY86	lymphocyte antigen 86 (LY86), mRNA.	3	4	7	0	0	0	0	0	0	3	4	7	0	3	3	0	0	0	0	0	0	6	13	#N/A	#N/A	#N/A
3005	NM_001098134	615490	SMOC2	SPARC related modular calcium binding 2 (SMOC2), mRNA.	4	8	12	0	0	0	1	0	1	5	8	13	0	0	0	0	0	0	0	0	0	0	13	#N/A	#N/A	#N/A
3172	NM_001099114	540830	HHIP	hedgehog interacting protein (HHIP), mRNA.	1	12	13	0	0	0	0	0	0	1	12	13	0	0	0	0	0	0	0	0	0	0	13	#N/A	1	#N/A
3500	NM_001101942	511281	ORC2	origin recognition complex subunit 2 (ORC2), mRNA.	3	0	3	0	3	3	0	7	7	3	10	13	0	0	0	0	0	0	0	0	0	0	13	#N/A	#N/A	#N/A
3552	NM_001102038	516584	MFSD14A	major facilitator superfamily domain containing 14A (MFSD14A), mRNA.	11	1	12	0	0	0	0	1	1	11	2	13	0	0	0	0	0	0	0	0	0	0	13	#N/A	#N/A	#N/A
3657	NM_001102194	536810	MTMR2	myotubularin related protein 2 (MTMR2), mRNA.	9	3	12	0	0	0	0	1	1	9	4	13	0	0	0	0	0	0	0	0	0	0	13	#N/A	#N/A	#N/A
3683	NM_001102239	540353	RNF111	ring finger protein 111 (RNF111), mRNA.	2	9	11	1	0	1	1	0	1	4	9	13	0	0	0	0	0	0	0	0	0	0	13	#N/A	#N/A	#N/A
3760	NM_001102482	407101	TJP2	tight junction protein 2 (TJP2), mRNA.	6	0	6	0	0	0	0	5	5	6	5	11	0	1	1	0	0	0	0	0	0	2	13	#N/A	#N/A	#N/A
3798	NM_001102537	789618	CDC42SE2	CDC42 small effector 2 (CDC42SE2), mRNA.	4	7	11	0	0	0	0	2	2	4	9	13	0	0	0	0	0	0	0	0	0	0	13	#N/A	#N/A	#N/A
3883	NM_001103337	100125304	ZNF613	zinc finger protein 613 (ZNF613), mRNA.	0	13	13	0	0	0	0	0	0	0	13	13	0	0	0	0	0	0	0	0	0	0	13	#N/A	#N/A	#N/A
3891	NM_001103348	100125317	ERO1A	endoplasmic reticulum oxidoreductase 1 alpha (ERO1A), mRNA.	3	2	5	0	0	0	1	1	2	4	3	7	0	0	0	0	1	1	0	2	2	6	13	-1.11678	#N/A	#N/A
4298	NM_001166492	281062	CDH2	cadherin 2 (CDH2), mRNA.	2	11	13	0	0	0	0	0	0	2	11	13	0	0	0	0	0	0	0	0	0	0	13	#N/A	#N/A	#N/A
4302	NM_001166510	281985	PLCB4	phospholipase C beta 4 (PLCB4), mRNA.	4	0	4	0	0	0	3	6	9	7	6	13	0	0	0	0	0	0	0	0	0	0	13	#N/A	#N/A	#N/A
4337	NM_001167904	537616	POLD3	DNA polymerase delta 3, accessory subunit (POLD3), mRNA.	2	9	11	0	0	0	1	1	2	3	10	13	0	0	0	0	0	0	0	0	0	0	13	#N/A	#N/A	#N/A
4351	NM_001177596	508887	SLC8B1	solute carrier family 8 member B1 (SLC8B1), mRNA; nuclear gene for mitochondrial product.	8	1	9	0	1	1	1	2	3	9	4	13	0	0	0	0	0	0	0	0	0	0	13	1.29616	#N/A	#N/A
4389	NM_001191171	506031	ZMYND8	zinc finger MYND-type containing 8 (ZMYND8), mRNA.	5	6	11	1	0	1	0	1	1	6	7	13	0	0	0	0	0	0	0	0	0	0	13	#N/A	#N/A	#N/A
4396	NM_001191182	533900	RFX4	regulatory factor X4 (RFX4), mRNA.	2	10	12	1	0	1	0	0	0	3	10	13	0	0	0	0	0	0	0	0	0	0	13	#N/A	#N/A	#N/A
4504	NM_001191413	517987	NEBL	nebulette (NEBL), mRNA.	2	10	12	1	0	1	0	0	0	3	10	13	0	0	0	0	0	0	0	0	0	0	13	3.63546	#N/A	#N/A
4534	NM_001191461	100125264	NUP210	nucleoporin 210 (NUP210), mRNA.	8	3	11	0	0	0	2	0	2	10	3	13	0	0	0	0	0	0	0	0	0	0	13	#N/A	#N/A	#N/A
4567	NM_001191532	100295817	DOCK8	dedicator of cytokinesis 8 (DOCK8), mRNA.	11	2	13	0	0	0	0	0	0	11	2	13	0	0	0	0	0	0	0	0	0	0	13	#N/A	1	#N/A
4709	NM_001192286	539633	HLTF	helicase like transcription factor (HLTF), mRNA.	1	9	10	0	0	0	3	0	3	4	9	13	0	0	0	0	0	0	0	0	0	0	13	-1.55103	#N/A	#N/A
4712	NM_001192298	511595	PARP8	poly(ADP-ribose) polymerase family member 8 (PARP8), mRNA.	4	7	11	0	0	0	2	0	2	6	7	13	0	0	0	0	0	0	0	0	0	0	13	#N/A	#N/A	#N/A
4719	NM_001192310	539797	RTKN2	rhotekin 2 (RTKN2), mRNA.	2	8	10	1	0	1	2	0	2	5	8	13	0	0	0	0	0	0	0	0	0	0	13	#N/A	#N/A	#N/A
4722	NM_001192318	512321	MIOS	meiosis regulator for oocyte development (MIOS), mRNA.	11	0	11	0	1	1	0	1	1	11	2	13	0	0	0	0	0	0	0	0	0	0	13	#N/A	#N/A	#N/A
4845	NM_001192538	521431	SCAI	suppressor of cancer cell invasion (SCAI), mRNA.	12	1	13	0	0	0	0	0	0	12	1	13	0	0	0	0	0	0	0	0	0	0	13	#N/A	#N/A	#N/A
4851	NM_001192549	521962	MLLT3	MLLT3 super elongation complex subunit (MLLT3), mRNA.	3	3	6	0	0	0	0	7	7	3	10	13	0	0	0	0	0	0	0	0	0	0	13	#N/A	#N/A	#N/A
4896	NM_001192619	525908	LDLRAD3	low density lipoprotein receptor class A domain containing 3 (LDLRAD3), mRNA.	4	8	12	0	0	0	1	0	1	5	8	13	0	0	0	0	0	0	0	0	0	0	13	#N/A	#N/A	#N/A
4974	NM_001192746	532952	MAGI3	membrane associated guanylate kinase, WW and PDZ domain containing 3 (MAGI3), mRNA.	0	5	5	0	0	0	7	1	8	7	6	13	0	0	0	0	0	0	0	0	0	0	13	1.72995	#N/A	#N/A
5174	NM_001193025	408013	CACNA1D	calcium voltage-gated channel subunit alpha1 D (CACNA1D), mRNA.	8	4	12	1	0	1	0	0	0	9	4	13	0	0	0	0	0	0	0	0	0	0	13	#N/A	#N/A	#N/A
5178	NM_001193032	530230	CCDC91	coiled-coil domain containing 91 (CCDC91), mRNA.	3	6	9	0	0	0	2	2	4	5	8	13	0	0	0	0	0	0	0	0	0	0	13	#N/A	#N/A	#N/A
5344	NM_001205308	280958	VWF	von Willebrand factor (VWF), mRNA.	3	10	13	0	0	0	0	0	0	3	10	13	0	0	0	0	0	0	0	0	0	0	13	-2.58957	#N/A	#N/A
5701	NM_001205991	531877	PTPN12	protein tyrosine phosphatase non-receptor type 12 (PTPN12), mRNA.	2	7	9	0	0	0	4	0	4	6	7	13	0	0	0	0	0	0	0	0	0	0	13	#N/A	#N/A	#N/A
5847	NM_001206211	615534	FNDC3B	fibronectin type III domain containing 3B (FNDC3B), mRNA.	4	7	11	0	0	0	0	2	2	4	9	13	0	0	0	0	0	0	0	0	0	0	13	#N/A	#N/A	#N/A
5854	NM_001206220	535132	SIPA1L2	signal induced proliferation associated 1 like 2 (SIPA1L2), mRNA.	3	4	7	0	0	0	2	4	6	5	8	13	0	0	0	0	0	0	0	0	0	0	13	#N/A	#N/A	#N/A
5967	NM_001206519	520030	LAMB1	laminin subunit beta 1 (LAMB1), mRNA.	1	9	10	0	0	0	3	0	3	4	9	13	0	0	0	0	0	0	0	0	0	0	13	#N/A	#N/A	#N/A
6233	NM_001281916	530146	SLC44A5	solute carrier family 44 member 5 (SLC44A5), mRNA.	9	3	12	0	0	0	0	1	1	9	4	13	0	0	0	0	0	0	0	0	0	0	13	#N/A	#N/A	#N/A
6326	NM_001359988	538628	RUNX1T1	RUNX1 partner transcriptional co-repressor 1 (RUNX1T1), mRNA.	4	1	5	0	0	0	5	3	8	9	4	13	0	0	0	0	0	0	0	0	0	0	13	#N/A	#N/A	#N/A
6505	NM_174214	281569	UPK2	uroplakin 2 (UPK2), mRNA.	2	10	12	1	0	1	0	0	0	3	10	13	0	0	0	0	0	0	0	0	0	0	13	#N/A	#N/A	#N/A
6565	NM_174323	281789	GNA14	G protein subunit alpha 14 (GNA14), mRNA.	7	6	13	0	0	0	0	0	0	7	6	13	0	0	0	0	0	0	0	0	0	0	13	#N/A	#N/A	#N/A
6566	NM_174324	281790	GNAI1	G protein subunit alpha i1 (GNAI1), mRNA.	8	1	9	0	1	1	0	3	3	8	5	13	0	0	0	0	0	0	0	0	0	0	13	#N/A	#N/A	#N/A
6568	NM_174331	281801	GRK5	G protein-coupled receptor kinase 5 (GRK5), mRNA.	7	2	9	0	0	0	0	4	4	7	6	13	0	0	0	0	0	0	0	0	0	0	13	#N/A	#N/A	#N/A
6604	NM_174391	281916	MMP20	matrix metallopeptidase 20 (MMP20), mRNA.	4	4	8	0	0	0	1	2	3	5	6	11	0	1	1	0	0	0	0	0	0	2	13	#N/A	#N/A	#N/A
6671	NM_174512	282173	CDK5R1	cyclin dependent kinase 5 regulatory subunit 1 (CDK5R1), mRNA.	6	7	13	0	0	0	0	0	0	6	7	13	0	0	0	0	0	0	0	0	0	0	13	#N/A	#N/A	#N/A
6768	NM_174704	282657	ATP6V1H	ATPase H+ transporting V1 subunit H (ATP6V1H), mRNA.	3	8	11	0	0	0	1	1	2	4	9	13	0	0	0	0	0	0	0	0	0	0	13	#N/A	#N/A	#N/A
6926	NM_181006	281071	CHGB	chromogranin B (CHGB), mRNA.	7	0	7	0	0	0	0	2	2	7	2	9	1	0	1	0	0	0	0	1	1	4	13	#N/A	#N/A	CHGB
6972	NM_205794	404130	AGO2	argonaute RISC catalytic component 2 (AGO2), mRNA.	6	7	13	0	0	0	0	0	0	6	7	13	0	0	0	0	0	0	0	0	0	0	13	#N/A	#N/A	#N/A
21	NM_001001174	408007	P2RY12	purinergic receptor P2Y12 (P2RY12), mRNA.	3	2	5	0	0	0	1	0	1	4	2	6	1	1	2	0	0	0	0	1	1	6	12	3.42332	#N/A	P2RY12
60	NM_001008666	493988	SLC14A1	solute carrier family 14 member 1 (SLC14A1), mRNA.	4	6	10	1	1	2	0	0	0	5	7	12	0	0	0	0	0	0	0	0	0	0	12	#N/A	#N/A	#N/A
262	NM_001024528	513260	FASTKD3	FAST kinase domains 3 (FASTKD3), mRNA; nuclear gene for mitochondrial product.	0	4	4	0	0	0	2	0	2	2	4	6	0	2	2	0	0	0	1	0	1	6	12	#N/A	#N/A	#N/A
315	NM_001031771	537938	CPPED1	calcineurin like phosphoesterase domain containing 1 (CPPED1), mRNA.	1	9	10	0	1	1	1	0	1	2	10	12	0	0	0	0	0	0	0	0	0	0	12	-2.06406	#N/A	#N/A
340	NM_001034045	286883	MAP2K6	mitogen-activated protein kinase kinase 6 (MAP2K6), mRNA.	2	8	10	1	0	1	0	1	1	3	9	12	0	0	0	0	0	0	0	0	0	0	12	#N/A	#N/A	#N/A
497	NM_001034577	532606	TASP1	taspase 1 (TASP1), mRNA.	2	1	3	0	0	0	7	2	9	9	3	12	0	0	0	0	0	0	0	0	0	0	12	#N/A	#N/A	#N/A
519	NM_001034616	534797	TMEM183A	transmembrane protein 183A (TMEM183A), mRNA.	0	6	6	0	0	0	2	0	2	2	6	8	0	1	1	0	0	0	1	0	1	4	12	#N/A	1	#N/A
663	NM_001035110	512871	CIAO2A	cytosolic iron-sulfur assembly component 2A (CIAO2A), mRNA.	1	3	4	0	0	0	0	0	0	1	3	4	3	0	3	0	0	0	1	0	1	8	12	#N/A	#N/A	#N/A
696	NM_001035329	518402	KIFAP3	kinesin associated protein 3 (KIFAP3), mRNA.	2	5	7	1	0	1	0	4	4	3	9	12	0	0	0	0	0	0	0	0	0	0	12	#N/A	#N/A	#N/A
750	NM_001035431	540888	PTPN2	protein tyrosine phosphatase non-receptor type 2 (PTPN2), mRNA.	4	1	5	0	0	0	0	3	3	4	4	8	0	2	2	0	0	0	0	0	0	4	12	#N/A	#N/A	#N/A
771	NM_001035475	616477	CHCHD3	coiled-coil-helix-coiled-coil-helix domain containing 3 (CHCHD3), mRNA.	7	5	12	0	0	0	0	0	0	7	5	12	0	0	0	0	0	0	0	0	0	0	12	#N/A	#N/A	#N/A
780	NM_001035494	617294	RPH3AL	rabphilin 3A like (without C2 domains) (RPH3AL), mRNA.	8	4	12	0	0	0	0	0	0	8	4	12	0	0	0	0	0	0	0	0	0	0	12	#N/A	#N/A	#N/A
1142	NM_001046082	511257	RHOT1	ras homolog family member T1 (RHOT1), mRNA; nuclear gene for mitochondrial product.	0	10	10	2	0	2	0	0	0	2	10	12	0	0	0	0	0	0	0	0	0	0	12	#N/A	#N/A	#N/A
1311	NM_001046448	539055	TSPAN14	tetraspanin 14 (TSPAN14), mRNA.	2	4	6	0	0	0	3	3	6	5	7	12	0	0	0	0	0	0	0	0	0	0	12	#N/A	#N/A	#N/A
1379	NM_001046597	617293	ELOVL5	ELOVL fatty acid elongase 5 (ELOVL5), mRNA.	4	8	12	0	0	0	0	0	0	4	8	12	0	0	0	0	0	0	0	0	0	0	12	#N/A	#N/A	#N/A
1508	NM_001075375	508836	SNX10	sorting nexin 10 (SNX10), mRNA.	8	2	10	0	0	0	0	2	2	8	4	12	0	0	0	0	0	0	0	0	0	0	12	#N/A	#N/A	#N/A
1691	NM_001075786	519337	LMBR1	limb development membrane protein 1 (LMBR1), mRNA.	7	4	11	0	0	0	0	1	1	7	5	12	0	0	0	0	0	0	0	0	0	0	12	#N/A	#N/A	#N/A
1837	NM_001076047	535125	EFR3A	EFR3 homolog A (EFR3A), mRNA.	8	0	8	0	2	2	0	2	2	8	4	12	0	0	0	0	0	0	0	0	0	0	12	#N/A	#N/A	#N/A
1839	NM_001076052	535311	HOMER1	homer scaffold protein 1 (HOMER1), mRNA.	5	5	10	0	0	0	1	1	2	6	6	12	0	0	0	0	0	0	0	0	0	0	12	#N/A	#N/A	#N/A
2594	NM_001080357	783986	ANAPC10	anaphase promoting complex subunit 10 (ANAPC10), mRNA.	10	0	10	0	0	0	0	2	2	10	2	12	0	0	0	0	0	0	0	0	0	0	12	#N/A	#N/A	#N/A
2620	NM_001080920	783765	TSPAN18	tetraspanin 18 (TSPAN18), mRNA.	6	6	12	0	0	0	0	0	0	6	6	12	0	0	0	0	0	0	0	0	0	0	12	#N/A	#N/A	#N/A
2652	NM_001081596	529939	LAMB3	laminin subunit beta 3 (LAMB3), mRNA.	9	3	12	0	0	0	0	0	0	9	3	12	0	0	0	0	0	0	0	0	0	0	12	2.38574	#N/A	#N/A
2726	NM_001082603	505592	CCDC97	coiled-coil domain containing 97 (CCDC97), mRNA.	0	4	4	0	0	0	0	0	0	0	4	4	0	4	4	0	0	0	0	0	0	8	12	#N/A	#N/A	#N/A
2822	NM_001083636	353106	PPARD	peroxisome proliferator activated receptor delta (PPARD), mRNA.	8	3	11	0	0	0	0	1	1	8	4	12	0	0	0	0	0	0	0	0	0	0	12	#N/A	#N/A	#N/A
2854	NM_001083706	525931	PDGFD	platelet derived growth factor D (PDGFD), mRNA.	6	2	8	1	0	1	1	0	1	8	2	10	1	0	1	0	0	0	0	0	0	2	12	#N/A	#N/A	#N/A
2862	NM_001083720	533523	DDR2	discoidin domain receptor tyrosine kinase 2 (DDR2), mRNA.	7	4	11	0	0	0	0	1	1	7	5	12	0	0	0	0	0	0	0	0	0	0	12	#N/A	#N/A	#N/A
3058	NM_001098908	508374	QTRT2	queuine tRNA-ribosyltransferase accessory subunit 2 (QTRT2), mRNA.	0	3	3	0	0	0	7	0	7	7	3	10	0	1	1	0	0	0	0	0	0	2	12	#N/A	#N/A	#N/A
3273	NM_001100321	508088	NDE1	nudE neurodevelopment protein 1 (NDE1), mRNA.	6	6	12	0	0	0	0	0	0	6	6	12	0	0	0	0	0	0	0	0	0	0	12	-1.50945	#N/A	#N/A
3285	NM_001100340	511508	PJA2	praja ring finger ubiquitin ligase 2 (PJA2), mRNA.	2	6	8	0	0	0	4	0	4	6	6	12	0	0	0	0	0	0	0	0	0	0	12	#N/A	#N/A	#N/A
3294	NM_001100359	513955	SERPINE3	serpin family E member 3 (SERPINE3), mRNA.	2	6	8	0	0	0	0	0	0	2	6	8	2	0	2	0	0	0	0	0	0	4	12	#N/A	#N/A	#N/A
3301	NM_001100374	516237	MSLN	mesothelin (MSLN), mRNA.	3	0	3	0	2	2	0	1	1	3	3	6	3	0	3	0	0	0	0	0	0	6	12	#N/A	#N/A	#N/A
3526	NM_001101989	514175	TMEM144	transmembrane protein 144 (TMEM144), mRNA.	3	9	12	0	0	0	0	0	0	3	9	12	0	0	0	0	0	0	0	0	0	0	12	#N/A	#N/A	#N/A
3595	NM_001102096	525888	TOX	thymocyte selection associated high mobility group box (TOX), mRNA.	7	3	10	0	0	0	1	1	2	8	4	12	0	0	0	0	0	0	0	0	0	0	12	#N/A	#N/A	#N/A
3669	NM_001102215	538498	ZZZ3	zinc finger ZZ-type containing 3 (ZZZ3), mRNA.	5	7	12	0	0	0	0	0	0	5	7	12	0	0	0	0	0	0	0	0	0	0	12	#N/A	#N/A	#N/A
3842	NM_001103258	522186	YIPF7	Yip1 domain family member 7 (YIPF7), mRNA.	0	10	10	0	0	0	1	1	2	1	11	12	0	0	0	0	0	0	0	0	0	0	12	#N/A	#N/A	#N/A
3913	NM_001104986	530184	SSBP3	single stranded DNA binding protein 3 (SSBP3), mRNA.	4	7	11	1	0	1	0	0	0	5	7	12	0	0	0	0	0	0	0	0	0	0	12	2.01005	#N/A	#N/A
4072	NM_001110000	407170	KDR	kinase insert domain receptor (KDR), mRNA.	1	0	1	0	0	0	0	11	11	1	11	12	0	0	0	0	0	0	0	0	0	0	12	#N/A	#N/A	#N/A
4117	NM_001113240	281311	MSR1	macrophage scavenger receptor 1 (MSR1), transcript variant 1, mRNA.	3	6	9	1	0	1	2	0	2	6	6	12	0	0	0	0	0	0	0	0	0	0	12	-2.37988	#N/A	#N/A
4188	NM_001130762	784720	ELP3	elongator acetyltransferase complex subunit 3 (ELP3), mRNA.	6	5	11	0	0	0	1	0	1	7	5	12	0	0	0	0	0	0	0	0	0	0	12	#N/A	#N/A	#N/A
4216	NM_001143874	517781	DNAH7	dynein axonemal heavy chain 7 (DNAH7), mRNA.	1	2	3	1	1	2	2	5	7	4	8	12	0	0	0	0	0	0	0	0	0	0	12	#N/A	#N/A	#N/A
4236	NM_001144107	617299	OTOF	otoferlin (OTOF), mRNA.	2	1	3	0	0	0	2	7	9	4	8	12	0	0	0	0	0	0	0	0	0	0	12	#N/A	#N/A	#N/A
4270	NM_001163802	508723	ATP8A2	ATPase, aminophospholipid transporter, class I, type 8A, member 2 (ATP8A2), mRNA.	3	5	8	1	2	3	0	1	1	4	8	12	0	0	0	0	0	0	0	0	0	0	12	#N/A	#N/A	#N/A
4308	NM_001166524	282704	TBC1D1	TBC1 domain family member 1 (TBC1D1), mRNA.	8	2	10	0	0	0	0	2	2	8	4	12	0	0	0	0	0	0	0	0	0	0	12	-1.6246	#N/A	#N/A
4343	NM_001168426	529591	PHF20	PHD finger protein 20 (PHF20), mRNA.	4	7	11	0	0	0	1	0	1	5	7	12	0	0	0	0	0	0	0	0	0	0	12	#N/A	#N/A	#N/A
4418	NM_001191229	524645	DCAF6	DDB1 and CUL4 associated factor 6 (DCAF6), mRNA.	2	7	9	0	0	0	2	1	3	4	8	12	0	0	0	0	0	0	0	0	0	0	12	1.56685	#N/A	#N/A
4485	NM_001191369	613425	UROS	uroporphyrinogen III synthase (UROS), mRNA.	4	4	8	0	0	0	1	1	2	5	5	10	1	0	1	0	0	0	0	0	0	2	12	#N/A	#N/A	#N/A
4551	NM_001191501	536993	PATJ	PATJ, crumbs cell polarity complex component (PATJ), mRNA.	9	2	11	0	0	0	0	1	1	9	3	12	0	0	0	0	0	0	0	0	0	0	12	2.15336	#N/A	#N/A
4561	NM_001191523	518225	CNOT6L	CCR4-NOT transcription complex subunit 6 like (CNOT6L), mRNA.	0	1	1	0	2	2	6	3	9	6	6	12	0	0	0	0	0	0	0	0	0	0	12	1.44736	#N/A	#N/A
4605	NM_001192078	505919	HIP1	huntingtin interacting protein 1 (HIP1), mRNA.	2	9	11	0	0	0	1	0	1	3	9	12	0	0	0	0	0	0	0	0	0	0	12	-1.7899	#N/A	#N/A
4609	NM_001192084	506201	EVL	Enah/Vasp-like (EVL), mRNA.	6	3	9	0	0	0	1	0	1	7	3	10	0	1	1	0	0	0	0	0	0	2	12	#N/A	#N/A	#N/A
4678	NM_001192222	509460	THUMPD2	THUMP domain containing 2 (THUMPD2), mRNA.	5	6	11	0	0	0	0	1	1	5	7	12	0	0	0	0	0	0	0	0	0	0	12	#N/A	#N/A	#N/A
4694	NM_001192258	510506	CPS1	carbamoyl-phosphate synthase 1 (CPS1), mRNA; nuclear gene for mitochondrial product.	2	3	5	0	0	0	7	0	7	9	3	12	0	0	0	0	0	0	0	0	0	0	12	#N/A	#N/A	#N/A
4711	NM_001192293	511461	MRTFB	myocardin related transcription factor B (MRTFB), mRNA.	9	3	12	0	0	0	0	0	0	9	3	12	0	0	0	0	0	0	0	0	0	0	12	#N/A	#N/A	#N/A
4739	NM_001192343	513148	DHX35	DEAH-box helicase 35 (DHX35), mRNA.	11	1	12	0	0	0	0	0	0	11	1	12	0	0	0	0	0	0	0	0	0	0	12	#N/A	#N/A	#N/A
4862	NM_001192566	522767	NTN1	netrin 1 (NTN1), mRNA.	3	8	11	1	0	1	0	0	0	4	8	12	0	0	0	0	0	0	0	0	0	0	12	#N/A	#N/A	#N/A
4868	NM_001192575	523202	CUBN	cubilin (CUBN), mRNA.	8	4	12	0	0	0	0	0	0	8	4	12	0	0	0	0	0	0	0	0	0	0	12	#N/A	#N/A	#N/A
4892	NM_001192614	525628	DIAPH3	diaphanous related formin 3 (DIAPH3), mRNA.	4	8	12	0	0	0	0	0	0	4	8	12	0	0	0	0	0	0	0	0	0	0	12	#N/A	#N/A	#N/A
4936	NM_001192681	529752	QRFPR	pyroglutamylated RFamide peptide receptor (QRFPR), mRNA.	4	7	11	1	0	1	0	0	0	5	7	12	0	0	0	0	0	0	0	0	0	0	12	#N/A	#N/A	#N/A
4963	NM_001192732	540500	GALNT14	polypeptide N-acetylgalactosaminyltransferase 14 (GALNT14), mRNA.	0	3	3	0	0	0	2	7	9	2	10	12	0	0	0	0	0	0	0	0	0	0	12	#N/A	#N/A	#N/A
4984	NM_001192758	533174	SNX25	sorting nexin 25 (SNX25), mRNA.	1	6	7	1	0	1	2	0	2	4	6	10	1	0	1	0	0	0	0	0	0	2	12	#N/A	#N/A	#N/A
5090	NM_001192904	537324	CDH7	cadherin 7 (CDH7), mRNA.	1	8	9	0	1	1	2	0	2	3	9	12	0	0	0	0	0	0	0	0	0	0	12	#N/A	#N/A	#N/A
5092	NM_001192906	537464	DOCK7	dedicator of cytokinesis 7 (DOCK7), mRNA.	5	6	11	0	0	0	1	0	1	6	6	12	0	0	0	0	0	0	0	0	0	0	12	#N/A	#N/A	#N/A
5159	NM_001192998	508902	USP28	ubiquitin specific peptidase 28 (USP28), mRNA.	4	4	8	0	0	0	2	2	4	6	6	12	0	0	0	0	0	0	0	0	0	0	12	#N/A	#N/A	#N/A
5329	NM_001199027	516536	EVA1C	eva-1 homolog C (EVA1C), mRNA.	6	5	11	0	0	0	0	1	1	6	6	12	0	0	0	0	0	0	0	0	0	0	12	#N/A	#N/A	#N/A
5375	NM_001205421	782125	SIAH3	siah E3 ubiquitin protein ligase family member 3 (SIAH3), mRNA.	6	0	6	0	3	3	0	3	3	6	6	12	0	0	0	0	0	0	0	0	0	0	12	#N/A	#N/A	#N/A
5456	NM_001205553	538532	GOLIM4	golgi integral membrane protein 4 (GOLIM4), mRNA.	6	6	12	0	0	0	0	0	0	6	6	12	0	0	0	0	0	0	0	0	0	0	12	#N/A	#N/A	#N/A
5628	NM_001205877	520954	SGMS2	sphingomyelin synthase 2 (SGMS2), mRNA.	7	0	7	0	1	1	0	2	2	7	3	10	1	0	1	0	0	0	0	0	0	2	12	#N/A	#N/A	#N/A
5686	NM_001205970	530000	OSBP	oxysterol binding protein (OSBP), mRNA.	6	4	10	0	0	0	1	1	2	7	5	12	0	0	0	0	0	0	0	0	0	0	12	#N/A	#N/A	#N/A
5707	NM_001206004	540485	GRM1	glutamate metabotropic receptor 1 (GRM1), mRNA.	3	8	11	0	0	0	0	1	1	3	9	12	0	0	0	0	0	0	0	0	0	0	12	#N/A	#N/A	GRM1
5778	NM_001206104	537010	STRN	striatin (STRN), mRNA.	3	7	10	0	0	0	1	1	2	4	8	12	0	0	0	0	0	0	0	0	0	0	12	#N/A	#N/A	#N/A
5872	NM_001206257	616701	JAZF1	JAZF zinc finger 1 (JAZF1), mRNA.	8	3	11	0	0	0	1	0	1	9	3	12	0	0	0	0	0	0	0	0	0	0	12	#N/A	1	JAZF1
6092	NM_001206824	539586	KCNK9	potassium two pore domain channel subfamily K member 9 (KCNK9), mRNA.	6	3	9	0	2	2	0	1	1	6	6	12	0	0	0	0	0	0	0	0	0	0	12	#N/A	#N/A	#N/A
6095	NM_001206830	532834	TRPC4AP	transient receptor potential cation channel subfamily C member 4 associated protein (TRPC4AP), mRNA.	4	3	7	0	0	0	1	2	3	5	5	10	1	0	1	0	0	0	0	0	0	2	12	#N/A	#N/A	#N/A
6121	NM_001206908	614959	SEL1L	SEL1L ERAD E3 ligase adaptor subunit (SEL1L), mRNA.	1	5	6	0	0	0	3	3	6	4	8	12	0	0	0	0	0	0	0	0	0	0	12	#N/A	#N/A	#N/A
6193	NM_001252510	617871	C21H14orf132	chromosome 21 C14orf132 homolog (C21H14orf132), mRNA.	11	0	11	0	1	1	0	0	0	11	1	12	0	0	0	0	0	0	0	0	0	0	12	#N/A	#N/A	#N/A
6208	NM_001256669	517887	CYTH4	cytohesin 4 (CYTH4), mRNA.	9	0	9	0	1	1	0	2	2	9	3	12	0	0	0	0	0	0	0	0	0	0	12	#N/A	#N/A	#N/A
6285	NM_001305016	507682	BMP5	bone morphogenetic protein 5 (BMP5), mRNA.	4	5	9	0	1	1	0	0	0	4	6	10	0	1	1	0	0	0	0	0	0	2	12	#N/A	#N/A	#N/A
6380	NM_173961	280933	ST7	suppression of tumorigenicity 7 (ST7), mRNA.	0	10	10	0	0	0	2	0	2	2	10	12	0	0	0	0	0	0	0	0	0	0	12	#N/A	#N/A	#N/A
6617	NM_174413	281968	PCSK2	proprotein convertase subtilisin/kexin type 2 (PCSK2), mRNA.	5	4	9	1	2	3	0	0	0	6	6	12	0	0	0	0	0	0	0	0	0	0	12	#N/A	#N/A	#N/A
6785	NM_174748	282882	ITGA4	integrin subunit alpha 4 (ITGA4), mRNA.	5	4	9	0	0	0	0	3	3	5	7	12	0	0	0	0	0	0	0	0	0	0	12	#N/A	#N/A	#N/A
6850	NM_175798	327677	CD38	CD38 molecule (CD38), mRNA.	7	3	10	0	0	0	0	2	2	7	5	12	0	0	0	0	0	0	0	0	0	0	12	#N/A	#N/A	#N/A
6920	NM_180998	280846	LTF	lactotransferrin (LTF), mRNA.	0	11	11	1	0	1	0	0	0	1	11	12	0	0	0	0	0	0	0	0	0	0	12	#N/A	#N/A	#N/A
3446	NM_001101661	767957	DEFB119	defensin beta 119	0	0	0	0	0	0	0	0	0	0	0	0	0	6	6	0	0	0	0	0	0	12	12	#N/A	#N/A	#N/A
34	NM_001002763	282637	CDH1	cadherin 1 (CDH1), mRNA.	3	3	6	0	0	0	0	1	1	3	4	7	0	2	2	0	0	0	0	0	0	4	11	#N/A	#N/A	#N/A
128	NM_001014926	514742	SRPX2	sushi repeat containing protein X-linked 2 (SRPX2), mRNA.	5	0	5	1	1	2	0	4	4	6	5	11	0	0	0	0	0	0	0	0	0	0	11	#N/A	#N/A	#N/A
180	NM_001015586	513267	DSTN	destrin, actin depolymerizing factor (DSTN), mRNA.	1	5	6	2	0	2	2	1	3	5	6	11	0	0	0	0	0	0	0	0	0	0	11	#N/A	#N/A	#N/A
259	NM_001024522	511751	FEZ1	fasciculation and elongation protein zeta 1 (FEZ1), mRNA.	1	8	9	0	0	0	0	0	0	1	8	9	0	1	1	0	0	0	0	0	0	2	11	#N/A	#N/A	#N/A
299	NM_001030298	280869	MTR	5-methyltetrahydrofolate-homocysteine methyltransferase (MTR), mRNA.	0	0	0	0	1	1	1	9	10	1	10	11	0	0	0	0	0	0	0	0	0	0	11	#N/A	#N/A	#N/A
346	NM_001034206	504287	SOAT1	sterol O-acyltransferase 1 (SOAT1), mRNA.	2	8	10	0	0	0	1	0	1	3	8	11	0	0	0	0	0	0	0	0	0	0	11	#N/A	#N/A	#N/A
420	NM_001034399	511064	FXYD6	FXYD domain containing ion transport regulator 6 (FXYD6), mRNA.	6	2	8	1	1	2	1	0	1	8	3	11	0	0	0	0	0	0	0	0	0	0	11	1.89018	#N/A	#N/A
523	NM_001034621	534935	TCF4	transcription factor 4 (TCF4), mRNA.	4	7	11	0	0	0	0	0	0	4	7	11	0	0	0	0	0	0	0	0	0	0	11	#N/A	#N/A	#N/A
707	NM_001035346	523264	DHDDS	dehydrodolichyl diphosphate synthase subunit (DHDDS), mRNA.	1	9	10	0	0	0	1	0	1	2	9	11	0	0	0	0	0	0	0	0	0	0	11	#N/A	#N/A	#N/A
739	NM_001035410	535192	LIPC	lipase C, hepatic type (LIPC), mRNA.	0	7	7	0	0	0	0	0	0	0	7	7	0	2	2	0	0	0	0	0	0	4	11	#N/A	#N/A	#N/A
858	NM_001038063	509239	TMCC3	transmembrane and coiled-coil domain family 3 (TMCC3), mRNA.	10	0	10	0	0	0	0	1	1	10	1	11	0	0	0	0	0	0	0	0	0	0	11	#N/A	#N/A	#N/A
915	NM_001038171	536149	AGFG1	ArfGAP with FG repeats 1 (AGFG1), mRNA.	1	10	11	0	0	0	0	0	0	1	10	11	0	0	0	0	0	0	0	0	0	0	11	#N/A	#N/A	#N/A
998	NM_001040489	337918	SRPX	sushi repeat containing protein X-linked (SRPX), mRNA.	9	2	11	0	0	0	0	0	0	9	2	11	0	0	0	0	0	0	0	0	0	0	11	#N/A	#N/A	SRPX
1075	NM_001045940	506325	ZMYND11	zinc finger MYND-type containing 11 (ZMYND11), mRNA.	4	6	10	0	0	0	0	1	1	4	7	11	0	0	0	0	0	0	0	0	0	0	11	#N/A	#N/A	#N/A
1089	NM_001045976	507572	CHMP4C	charged multivesicular body protein 4C (CHMP4C), mRNA.	8	0	8	1	1	2	0	1	1	9	2	11	0	0	0	0	0	0	0	0	0	0	11	#N/A	#N/A	CHMP4C
1107	NM_001046006	508494	SLC22A9	solute carrier family 22 (organic anion transporter), member 9 (SLC22A9), mRNA.	7	0	7	0	0	0	0	2	2	7	2	9	1	0	1	0	0	0	0	0	0	2	11	#N/A	#N/A	#N/A
1151	NM_001046094	511627	CCDC82	coiled-coil domain containing 82 (CCDC82), mRNA.	3	1	4	0	0	0	6	1	7	9	2	11	0	0	0	0	0	0	0	0	0	0	11	#N/A	#N/A	#N/A
1191	NM_001046184	514940	IVNS1ABP	influenza virus NS1A binding protein (IVNS1ABP), mRNA.	5	1	6	0	0	0	0	1	1	5	2	7	2	0	2	0	0	0	0	0	0	4	11	1.70741	#N/A	#N/A
1215	NM_001046244	519522	CEP57L1	centrosomal protein 57 like 1 (CEP57L1), mRNA.	0	7	7	0	0	0	4	0	4	4	7	11	0	0	0	0	0	0	0	0	0	0	11	#N/A	#N/A	#N/A
1258	NM_001046334	532785	HADH	hydroxyacyl-CoA dehydrogenase (HADH), mRNA; nuclear gene for mitochondrial product.	4	6	10	0	0	0	0	1	1	4	7	11	0	0	0	0	0	0	0	0	0	0	11	#N/A	#N/A	#N/A
1403	NM_001075146	407223	HDAC2	histone deacetylase 2 (HDAC2), mRNA.	4	5	9	0	0	0	2	0	2	6	5	11	0	0	0	0	0	0	0	0	0	0	11	#N/A	#N/A	#N/A
1509	NM_001075376	508867	AP3S2	adaptor related protein complex 3 subunit sigma 2 (AP3S2), mRNA.	2	4	6	0	0	0	3	0	3	5	4	9	0	0	0	0	0	0	1	0	1	2	11	#N/A	#N/A	#N/A
1641	NM_001075662	514346	SDS	serine dehydratase (SDS), mRNA.	0	5	5	0	0	0	0	0	0	0	5	5	1	2	3	0	0	0	0	0	0	6	11	2.41464	#N/A	#N/A
1666	NM_001075740	516314	NOL10	nucleolar protein 10 (NOL10), mRNA.	5	2	7	1	1	2	1	1	2	7	4	11	0	0	0	0	0	0	0	0	0	0	11	#N/A	#N/A	#N/A
1688	NM_001075782	519014	ARL6	ADP ribosylation factor like GTPase 6 (ARL6), mRNA.	5	0	5	0	0	0	1	1	2	6	1	7	0	2	2	0	0	0	0	0	0	4	11	#N/A	#N/A	#N/A
1736	NM_001075864	525072	PLA2G4A	phospholipase A2 group IVA (PLA2G4A), mRNA.	1	10	11	0	0	0	0	0	0	1	10	11	0	0	0	0	0	0	0	0	0	0	11	#N/A	#N/A	#N/A
1887	NM_001076129	538785	STAMBPL1	STAM binding protein like 1 (STAMBPL1), mRNA.	10	1	11	0	0	0	0	0	0	10	1	11	0	0	0	0	0	0	0	0	0	0	11	#N/A	#N/A	#N/A
1889	NM_001076137	538961	ANKRD54	ankyrin repeat domain 54 (ANKRD54), mRNA.	11	0	11	0	0	0	0	0	0	11	0	11	0	0	0	0	0	0	0	0	0	0	11	#N/A	#N/A	#N/A
1988	NM_001076336	614573	SLC16A7	solute carrier family 16 member 7 (SLC16A7), mRNA.	0	9	9	0	0	0	0	0	0	0	9	9	0	0	0	0	0	0	1	0	1	2	11	#N/A	#N/A	#N/A
1990	NM_001076341	614701	SLC22A23	solute carrier family 22 member 23 (SLC22A23), mRNA.	3	8	11	0	0	0	0	0	0	3	8	11	0	0	0	0	0	0	0	0	0	0	11	#N/A	#N/A	#N/A
2011	NM_001076375	615436	AFAP1L2	actin filament associated protein 1 like 2 (AFAP1L2), mRNA.	3	6	9	0	1	1	1	0	1	4	7	11	0	0	0	0	0	0	0	0	0	0	11	#N/A	#N/A	#N/A
2061	NM_001076477	617788	UFSP2	UFM1 specific peptidase 2 (UFSP2), mRNA.	0	6	6	0	0	0	1	0	1	1	6	7	0	2	2	0	0	0	0	0	0	4	11	#N/A	#N/A	#N/A
2065	NM_001076483	617915	ANGPT4	angiopoietin 4 (ANGPT4), mRNA.	3	1	4	0	0	0	2	5	7	5	6	11	0	0	0	0	0	0	0	0	0	0	11	#N/A	#N/A	#N/A
2092	NM_001076545	767820	SGSM3	small G protein signaling modulator 3 (SGSM3), mRNA.	3	6	9	0	0	0	0	2	2	3	8	11	0	0	0	0	0	0	0	0	0	0	11	#N/A	#N/A	#N/A
2160	NM_001076893	533304	SLC66A2	solute carrier family 66 member 2 (SLC66A2), mRNA.	6	4	10	0	0	0	1	0	1	7	4	11	0	0	0	0	0	0	0	0	0	0	11	#N/A	#N/A	#N/A
2190	NM_001076939	615644	PUS7	pseudouridine synthase 7 (PUS7), mRNA.	5	4	9	0	0	0	0	0	0	5	4	9	0	0	0	0	0	0	1	0	1	2	11	#N/A	#N/A	#N/A
2284	NM_001077135	768080	TMCC2	transmembrane and coiled-coil domain family 2 (TMCC2), mRNA.	6	2	8	2	0	2	0	1	1	8	3	11	0	0	0	0	0	0	0	0	0	0	11	#N/A	#N/A	#N/A
2299	NM_001077833	286877	PRKCZ	protein kinase C zeta (PRKCZ), mRNA.	2	8	10	0	0	0	1	0	1	3	8	11	0	0	0	0	0	0	0	0	0	0	11	#N/A	#N/A	#N/A
2322	NM_001077874	507989	APLF	aprataxin and PNKP like factor (APLF), mRNA.	8	2	10	0	0	0	0	1	1	8	3	11	0	0	0	0	0	0	0	0	0	0	11	#N/A	#N/A	#N/A
2342	NM_001077921	514762	APBA2	amyloid beta precursor protein binding family A member 2 (APBA2), mRNA.	2	7	9	1	0	1	1	0	1	4	7	11	0	0	0	0	0	0	0	0	0	0	11	#N/A	#N/A	#N/A
2380	NM_001077988	532393	NTF3	neurotrophin 3 (NTF3), mRNA.	2	4	6	0	2	2	0	3	3	2	9	11	0	0	0	0	0	0	0	0	0	0	11	#N/A	#N/A	#N/A
2391	NM_001078001	534560	TMEM150C	transmembrane protein 150C (TMEM150C), mRNA.	1	0	1	1	4	5	2	3	5	4	7	11	0	0	0	0	0	0	0	0	0	0	11	#N/A	#N/A	#N/A
2469	NM_001078165	777790	CELF2	CUGBP Elav-like family member 2 (CELF2), mRNA.	1	10	11	0	0	0	0	0	0	1	10	11	0	0	0	0	0	0	0	0	0	0	11	#N/A	#N/A	#N/A
2666	NM_001081615	613590	XRCC4	X-ray repair cross complementing 4 (XRCC4), mRNA.	5	5	10	0	0	0	1	0	1	6	5	11	0	0	0	0	0	0	0	0	0	0	11	#N/A	#N/A	#N/A
2750	NM_001083397	509448	TFCP2	transcription factor CP2 (TFCP2), mRNA.	4	0	4	0	1	1	1	5	6	5	6	11	0	0	0	0	0	0	0	0	0	0	11	#N/A	#N/A	#N/A
2757	NM_001083411	511837	CIAO3	cytosolic iron-sulfur assembly component 3 (CIAO3), mRNA.	3	1	4	0	1	1	0	2	2	3	4	7	0	0	0	0	2	2	0	0	0	4	11	#N/A	#N/A	#N/A
2820	NM_001083533	789710	KLF13	Kruppel like factor 13 (KLF13), mRNA.	0	9	9	1	1	2	0	0	0	1	10	11	0	0	0	0	0	0	0	0	0	0	11	#N/A	#N/A	#N/A
2823	NM_001083638	407231	MEF2A	myocyte enhancer factor 2A (MEF2A), mRNA.	7	4	11	0	0	0	0	0	0	7	4	11	0	0	0	0	0	0	0	0	0	0	11	#N/A	#N/A	#N/A
2887	NM_001083764	614055	MYL12B	myosin, light chain 12B, regulatory (MYL12B), mRNA.	2	8	10	0	0	0	1	0	1	3	8	11	0	0	0	0	0	0	0	0	0	0	11	#N/A	#N/A	#N/A
3158	NM_001099081	537972	SPTLC2	serine palmitoyltransferase long chain base subunit 2 (SPTLC2), mRNA.	4	5	9	1	1	2	0	0	0	5	6	11	0	0	0	0	0	0	0	0	0	0	11	#N/A	#N/A	#N/A
3169	NM_001099106	540313	ETS1	ETS proto-oncogene 1, transcription factor (ETS1), mRNA.	0	10	10	1	0	1	0	0	0	1	10	11	0	0	0	0	0	0	0	0	0	0	11	#N/A	#N/A	#N/A
3253	NM_001099732	789811	MOB2	MOB kinase activator 2 (MOB2), mRNA.	2	5	7	0	1	1	1	0	1	3	6	9	1	0	1	0	0	0	0	0	0	2	11	#N/A	#N/A	#N/A
3309	NM_001100385	521115	PDSS2	decaprenyl diphosphate synthase subunit 2 (PDSS2), mRNA.	2	9	11	0	0	0	0	0	0	2	9	11	0	0	0	0	0	0	0	0	0	0	11	#N/A	#N/A	#N/A
3452	NM_001101843	504741	COLEC12	collectin subfamily member 12 (COLEC12), mRNA.	6	1	7	0	0	0	0	4	4	6	5	11	0	0	0	0	0	0	0	0	0	0	11	#N/A	#N/A	#N/A
3470	NM_001101879	507002	OLFM1	olfactomedin 1 (OLFM1), mRNA.	6	2	8	0	0	0	1	0	1	7	2	9	1	0	1	0	0	0	0	0	0	2	11	#N/A	#N/A	#N/A
3676	NM_001102223	539013	CDYL	chromodomain Y like (CDYL), mRNA.	4	5	9	0	0	0	0	2	2	4	7	11	0	0	0	0	0	0	0	0	0	0	11	#N/A	#N/A	#N/A
3863	NM_001103295	540643	LMNB1	lamin B1 (LMNB1), mRNA.	7	1	8	0	0	0	0	1	1	7	2	9	0	0	0	0	0	0	1	0	1	2	11	#N/A	#N/A	#N/A
3934	NM_001105036	100125578	SUGCT	succinyl-CoA:glutarate-CoA transferase (SUGCT), mRNA.	7	4	11	0	0	0	0	0	0	7	4	11	0	0	0	0	0	0	0	0	0	0	11	2.87991	#N/A	#N/A
3969	NM_001105372	515218	PPP6R3	protein phosphatase 6 regulatory subunit 3 (PPP6R3), mRNA.	6	3	9	0	0	0	1	1	2	7	4	11	0	0	0	0	0	0	0	0	0	0	11	#N/A	#N/A	#N/A
4032	NM_001105615	504630	CENPP	centromere protein P (CENPP), mRNA.	5	5	10	0	0	0	1	0	1	6	5	11	0	0	0	0	0	0	0	0	0	0	11	#N/A	#N/A	#N/A
4268	NM_001163785	536901	CDYL2	chromodomain Y like 2 (CDYL2), mRNA.	6	4	10	0	0	0	0	1	1	6	5	11	0	0	0	0	0	0	0	0	0	0	11	#N/A	#N/A	#N/A
4404	NM_001191199	540307	SLC8A3	solute carrier family 8 member A3 (SLC8A3), mRNA.	6	4	10	0	1	1	0	0	0	6	5	11	0	0	0	0	0	0	0	0	0	0	11	#N/A	#N/A	#N/A
4481	NM_001191361	100140210	USP30	ubiquitin specific peptidase 30 (USP30), mRNA.	4	0	4	0	1	1	1	5	6	5	6	11	0	0	0	0	0	0	0	0	0	0	11	#N/A	#N/A	USP30
4570	NM_001191535	100295209	GRIN3A	glutamate ionotropic receptor NMDA type subunit 3A (GRIN3A), mRNA.	1	7	8	0	0	0	2	1	3	3	8	11	0	0	0	0	0	0	0	0	0	0	11	#N/A	#N/A	#N/A
4671	NM_001192207	539250	KCNJ1	potassium inwardly rectifying channel subfamily J member 1 (KCNJ1), mRNA.	1	3	4	0	1	1	0	0	0	1	4	5	1	0	1	0	1	1	0	1	1	6	11	#N/A	#N/A	#N/A
4674	NM_001192210	509076	ZNRF1	zinc and ring finger 1 (ZNRF1), mRNA.	6	4	10	0	0	0	0	1	1	6	5	11	0	0	0	0	0	0	0	0	0	0	11	#N/A	#N/A	#N/A
4688	NM_001192250	510255	GLI2	GLI family zinc finger 2 (GLI2), mRNA.	3	2	5	1	4	5	0	1	1	4	7	11	0	0	0	0	0	0	0	0	0	0	11	#N/A	#N/A	#N/A
4774	NM_001192419	515620	TJAP1	tight junction associated protein 1 (TJAP1), mRNA.	4	3	7	0	0	0	0	0	0	4	3	7	0	1	1	0	1	1	0	0	0	4	11	#N/A	#N/A	#N/A
4805	NM_001192478	517953	RPS6KA2	ribosomal protein S6 kinase A2 (RPS6KA2), mRNA.	5	6	11	0	0	0	0	0	0	5	6	11	0	0	0	0	0	0	0	0	0	0	11	-2.01029	#N/A	#N/A
4810	NM_001192486	518395	ADAMTS18	ADAM metallopeptidase with thrombospondin type 1 motif 18 (ADAMTS18), mRNA.	2	8	10	1	0	1	0	0	0	3	8	11	0	0	0	0	0	0	0	0	0	0	11	#N/A	#N/A	#N/A
4872	NM_001192581	523498	MTSS1	MTSS I-BAR domain containing 1 (MTSS1), mRNA.	1	9	10	0	0	0	1	0	1	2	9	11	0	0	0	0	0	0	0	0	0	0	11	-1.44285	#N/A	#N/A
4890	NM_001192609	525276	ADAMTS12	ADAM metallopeptidase with thrombospondin type 1 motif 12 (ADAMTS12), mRNA.	0	2	2	0	0	0	7	2	9	7	4	11	0	0	0	0	0	0	0	0	0	0	11	#N/A	#N/A	#N/A
4924	NM_001192664	528530	CSF2RB	colony stimulating factor 2 receptor subunit beta (CSF2RB), mRNA.	5	3	8	0	0	0	0	1	1	5	4	9	1	0	1	0	0	0	0	0	0	2	11	2.45942	#N/A	#N/A
4960	NM_001192727	507969	SLCO4A1	solute carrier organic anion transporter family member 4A1 (SLCO4A1), mRNA.	5	5	10	0	0	0	1	0	1	6	5	11	0	0	0	0	0	0	0	0	0	0	11	1.10528	#N/A	#N/A
4979	NM_001192753	533109	TYW1	tRNA-yW synthesizing protein 1 homolog (S. cerevisiae) (TYW1), mRNA.	7	1	8	0	0	0	0	3	3	7	4	11	0	0	0	0	0	0	0	0	0	0	11	#N/A	#N/A	#N/A
5023	NM_001192817	534496	MYCBP2	MYC binding protein 2 (MYCBP2), mRNA.	2	9	11	0	0	0	0	0	0	2	9	11	0	0	0	0	0	0	0	0	0	0	11	#N/A	#N/A	#N/A
5032	NM_001192830	541114	RAB39A	RAB39A, member RAS oncogene family (RAB39A), mRNA.	2	5	7	1	0	1	2	1	3	5	6	11	0	0	0	0	0	0	0	0	0	0	11	#N/A	#N/A	#N/A
5033	NM_001192831	541127	NFATC3	nuclear factor of activated T cells 3 (NFATC3), mRNA.	9	1	10	0	0	0	0	1	1	9	2	11	0	0	0	0	0	0	0	0	0	0	11	#N/A	#N/A	#N/A
5040	NM_001192840	535006	TRIT1	tRNA isopentenyltransferase 1 (TRIT1), mRNA.	8	3	11	0	0	0	0	0	0	8	3	11	0	0	0	0	0	0	0	0	0	0	11	#N/A	#N/A	#N/A
5073	NM_001192882	536481	MDGA1	MAM domain containing glycosylphosphatidylinositol anchor 1 (MDGA1), mRNA.	10	0	10	0	1	1	0	0	0	10	1	11	0	0	0	0	0	0	0	0	0	0	11	#N/A	#N/A	#N/A
5074	NM_001192883	536550	XPR1	xenotropic and polytropic retrovirus receptor 1 (XPR1), mRNA.	5	1	6	0	2	2	0	3	3	5	6	11	0	0	0	0	0	0	0	0	0	0	11	-1.85609	#N/A	#N/A
5107	NM_001192928	538104	ZMPSTE24	zinc metallopeptidase STE24 (ZMPSTE24), mRNA.	1	7	8	0	0	0	3	0	3	4	7	11	0	0	0	0	0	0	0	0	0	0	11	#N/A	#N/A	#N/A
5171	NM_001193020	533491	RASA2	RAS p21 protein activator 2 (RASA2), mRNA.	1	9	10	1	0	1	0	0	0	2	9	11	0	0	0	0	0	0	0	0	0	0	11	1.61257	#N/A	#N/A
5271	NM_001193181	618048	CAPN7	calpain 7 (CAPN7), mRNA.	5	4	9	0	0	0	0	0	0	5	4	9	0	1	1	0	0	0	0	0	0	2	11	#N/A	#N/A	#N/A
5279	NM_001193205	537131	SMG7	SMG7 nonsense mediated mRNA decay factor (SMG7), mRNA.	3	6	9	0	0	0	2	0	2	5	6	11	0	0	0	0	0	0	0	0	0	0	11	#N/A	#N/A	#N/A
5452	NM_001205542	538470	ENTHD1	ENTH domain containing 1 (ENTHD1), mRNA.	8	2	10	0	0	0	0	1	1	8	3	11	0	0	0	0	0	0	0	0	0	0	11	#N/A	#N/A	#N/A
5546	NM_001205738	539967	SPTY2D1	SPT2 chromatin protein domain containing 1 (SPTY2D1), mRNA.	2	3	5	0	0	0	3	1	4	5	4	9	0	1	1	0	0	0	0	0	0	2	11	#N/A	#N/A	#N/A
5588	NM_001205811	515561	ZNF462	zinc finger protein 462 (ZNF462), mRNA.	1	8	9	1	0	1	1	0	1	3	8	11	0	0	0	0	0	0	0	0	0	0	11	#N/A	#N/A	#N/A
5612	NM_001205847	518403	ANKRD33B	ankyrin repeat domain 33B (ANKRD33B), mRNA.	5	2	7	0	0	0	0	0	0	5	2	7	1	1	2	0	0	0	0	0	0	4	11	#N/A	#N/A	#N/A
5641	NM_001205892	522055	TMPRSS7	transmembrane serine protease 7 (TMPRSS7), mRNA.	1	1	2	0	0	0	5	2	7	6	3	9	0	1	1	0	0	0	0	0	0	2	11	#N/A	#N/A	#N/A
5656	NM_001205921	525772	PLEKHG1	pleckstrin homology and RhoGEF domain containing G1 (PLEKHG1), mRNA.	4	7	11	0	0	0	0	0	0	4	7	11	0	0	0	0	0	0	0	0	0	0	11	#N/A	#N/A	#N/A
5791	NM_001206128	523809	UBASH3B	ubiquitin associated and SH3 domain containing B (UBASH3B), mRNA.	6	3	9	0	0	0	0	0	0	6	3	9	1	0	1	0	0	0	0	0	0	2	11	-1.83296	#N/A	#N/A
5802	NM_001206142	527162	TBC1D8	TBC1 domain family member 8 (TBC1D8), mRNA.	4	3	7	0	1	1	0	3	3	4	7	11	0	0	0	0	0	0	0	0	0	0	11	#N/A	#N/A	#N/A
5833	NM_001206184	614659	FAM174A	family with sequence similarity 174 member A (FAM174A), mRNA.	8	0	8	1	0	1	0	2	2	9	2	11	0	0	0	0	0	0	0	0	0	0	11	#N/A	#N/A	#N/A
6017	NM_001206635	517768	HS6ST2	heparan sulfate 6-O-sulfotransferase 2 (HS6ST2), mRNA.	9	1	10	0	0	0	0	1	1	9	2	11	0	0	0	0	0	0	0	0	0	0	11	#N/A	#N/A	#N/A
6096	NM_001206831	617450	LRP11	LDL receptor related protein 11 (LRP11), mRNA.	3	6	9	0	2	2	0	0	0	3	8	11	0	0	0	0	0	0	0	0	0	0	11	#N/A	#N/A	#N/A
6134	NM_001206968	789946	OTUD7A	OTU deubiquitinase 7A (OTUD7A), mRNA.	5	3	8	0	1	1	0	2	2	5	6	11	0	0	0	0	0	0	0	0	0	0	11	#N/A	#N/A	#N/A
6153	NM_001243284	506315	DNM3	dynamin 3 (DNM3), mRNA.	2	4	6	0	0	0	4	1	5	6	5	11	0	0	0	0	0	0	0	0	0	0	11	#N/A	#N/A	#N/A
6183	NM_001244591	100336382	TNIP2	TNFAIP3 interacting protein 2 (TNIP2), mRNA.	4	5	9	0	1	1	1	0	1	5	6	11	0	0	0	0	0	0	0	0	0	0	11	#N/A	#N/A	#N/A
6266	NM_001304277	507053	RXFP2	relaxin family peptide receptor 2 (RXFP2), mRNA.	8	1	9	0	0	0	0	0	0	8	1	9	0	1	1	0	0	0	0	0	0	2	11	#N/A	#N/A	#N/A
6523	NM_174241	281627	ANXA8L1	annexin A8-like 1 (ANXA8L1), mRNA.	2	4	6	2	0	2	0	1	1	4	5	9	0	1	1	0	0	0	0	0	0	2	11	-2.8533	#N/A	#N/A
6579	NM_174352	281849	IGF2R	insulin like growth factor 2 receptor (IGF2R), mRNA.	8	1	9	0	0	0	0	0	0	8	1	9	1	0	1	0	0	0	0	0	0	2	11	#N/A	#N/A	#N/A
6658	NM_174490	282124	VSNL1	visinin like 1 (VSNL1), mRNA.	1	0	1	0	0	0	0	10	10	1	10	11	0	0	0	0	0	0	0	0	0	0	11	#N/A	#N/A	VSNL1
6686	NM_174542	282237	GABRA3	gamma-aminobutyric acid type A receptor subunit alpha3 (GABRA3), mRNA.	2	3	5	0	0	0	3	3	6	5	6	11	0	0	0	0	0	0	0	0	0	0	11	#N/A	#N/A	#N/A
294	NM_001025327	509768	MTG1	mitochondrial ribosome associated GTPase 1 (MTG1), mRNA; nuclear gene for mitochondrial product.	1	1	2	0	0	0	1	1	2	2	2	4	2	0	2	0	0	0	1	0	1	6	10	#N/A	#N/A	#N/A
372	NM_001034275	507026	ICOS	inducible T cell costimulator (ICOS), mRNA.	1	4	5	2	0	2	2	1	3	5	5	10	0	0	0	0	0	0	0	0	0	0	10	#N/A	#N/A	#N/A
413	NM_001034374	510159	MAPRE2	microtubule associated protein RP/EB family member 2 (MAPRE2), mRNA.	9	1	10	0	0	0	0	0	0	9	1	10	0	0	0	0	0	0	0	0	0	0	10	#N/A	#N/A	#N/A
439	NM_001034443	513400	NADSYN1	NAD synthetase 1 (NADSYN1), mRNA.	2	5	7	0	0	0	1	0	1	3	5	8	0	1	1	0	0	0	0	0	0	2	10	#N/A	#N/A	#N/A
636	NM_001035072	509578	CD96	CD96 molecule (CD96), mRNA.	4	3	7	0	0	0	1	2	3	5	5	10	0	0	0	0	0	0	0	0	0	0	10	#N/A	#N/A	#N/A
668	NM_001035277	512302	CDH13	cadherin 13 (CDH13), mRNA.	1	8	9	1	0	1	0	0	0	2	8	10	0	0	0	0	0	0	0	0	0	0	10	#N/A	#N/A	#N/A
881	NM_001038104	514493	DTD1	D-aminoacyl-tRNA deacylase 1 (DTD1), mRNA.	2	8	10	0	0	0	0	0	0	2	8	10	0	0	0	0	0	0	0	0	0	0	10	#N/A	#N/A	#N/A
1090	NM_001045978	507597	NPL	N-acetylneuraminate pyruvate lyase (NPL), mRNA.	3	1	4	0	1	1	1	0	1	4	2	6	0	2	2	0	0	0	0	0	0	4	10	-2.63665	#N/A	#N/A
1145	NM_001046087	511451	CAB39	calcium binding protein 39 (CAB39), mRNA.	7	2	9	1	0	1	0	0	0	8	2	10	0	0	0	0	0	0	0	0	0	0	10	-1.09244	#N/A	#N/A
1200	NM_001046206	515605	APPL2	adaptor protein, phosphotyrosine interacting with PH domain and leucine zipper 2 (APPL2), mRNA.	7	0	7	0	0	0	0	3	3	7	3	10	0	0	0	0	0	0	0	0	0	0	10	#N/A	#N/A	#N/A
1219	NM_001046252	520564	LITAF	lipopolysaccharide induced TNF factor (LITAF), mRNA.	3	2	5	0	0	0	1	0	1	4	2	6	2	0	2	0	0	0	0	0	0	4	10	#N/A	#N/A	#N/A
1401	NM_001075142	404154	IL4R	interleukin 4 receptor (IL4R), mRNA.	7	1	8	0	0	0	0	2	2	7	3	10	0	0	0	0	0	0	0	0	0	0	10	#N/A	#N/A	#N/A
1501	NM_001075359	508402	ARPC1A	actin related protein 2/3 complex subunit 1A (ARPC1A), mRNA.	3	4	7	0	1	1	0	0	0	3	5	8	0	0	0	0	0	0	1	0	1	2	10	#N/A	#N/A	#N/A
1638	NM_001075653	514209	ASNS	asparagine synthetase (glutamine-hydrolyzing) (ASNS), mRNA.	3	6	9	0	0	0	1	0	1	4	6	10	0	0	0	0	0	0	0	0	0	0	10	#N/A	#N/A	#N/A
1651	NM_001075690	514919	WDR41	WD repeat domain 41 (WDR41), mRNA.	5	1	6	0	1	1	0	3	3	5	5	10	0	0	0	0	0	0	0	0	0	0	10	#N/A	#N/A	#N/A
1683	NM_001075770	518288	P4HA1	prolyl 4-hydroxylase subunit alpha 1 (P4HA1), mRNA.	6	3	9	0	0	0	0	1	1	6	4	10	0	0	0	0	0	0	0	0	0	0	10	#N/A	#N/A	#N/A
1842	NM_001076056	535390	PPME1	protein phosphatase methylesterase 1 (PPME1), mRNA.	6	0	6	0	1	1	0	1	1	6	2	8	1	0	1	0	0	0	0	0	0	2	10	#N/A	#N/A	#N/A
2096	NM_001076797	282140	ANGPT1	angiopoietin 1 (ANGPT1), mRNA.	4	1	5	0	0	0	2	3	5	6	4	10	0	0	0	0	0	0	0	0	0	0	10	#N/A	#N/A	#N/A
2106	NM_001076812	507340	ATG13	autophagy related 13 (ATG13), mRNA.	6	2	8	0	0	0	0	2	2	6	4	10	0	0	0	0	0	0	0	0	0	0	10	1.89122	#N/A	#N/A
2127	NM_001076842	512734	STAM	signal transducing adaptor molecule (STAM), mRNA.	8	0	8	0	0	0	0	2	2	8	2	10	0	0	0	0	0	0	0	0	0	0	10	#N/A	#N/A	#N/A
2137	NM_001076856	515461	SARAF	store-operated calcium entry associated regulatory factor (SARAF), mRNA.	5	4	9	0	0	0	0	1	1	5	5	10	0	0	0	0	0	0	0	0	0	0	10	#N/A	#N/A	#N/A
2266	NM_001077088	768029	C17H4orf45	chromosome 17 C4orf45 homolog (C17H4orf45), mRNA.	4	5	9	0	0	0	1	0	1	5	5	10	0	0	0	0	0	0	0	0	0	0	10	#N/A	#N/A	#N/A
2388	NM_001077997	534101	BMPER	BMP binding endothelial regulator (BMPER), mRNA.	3	1	4	0	0	0	2	4	6	5	5	10	0	0	0	0	0	0	0	0	0	0	10	#N/A	#N/A	#N/A
2549	NM_001080261	511941	CEACAM19	CEA cell adhesion molecule 19 (CEACAM19), mRNA.	0	6	6	1	0	1	0	1	1	1	7	8	0	1	1	0	0	0	0	0	0	2	10	#N/A	#N/A	#N/A
2576	NM_001080319	615509	MINDY4	MINDY lysine 48 deubiquitinase 4 (MINDY4), mRNA.	2	2	4	0	0	0	0	0	0	2	2	4	3	0	3	0	0	0	0	0	0	6	10	#N/A	#N/A	#N/A
2584	NM_001080332	618047	DNAJC15	DnaJ heat shock protein family (Hsp40) member C15 (DNAJC15), mRNA.	3	6	9	0	0	0	0	1	1	3	7	10	0	0	0	0	0	0	0	0	0	0	10	#N/A	#N/A	DNAJC15
2607	NM_001080727	505694	FXN	frataxin (FXN), mRNA; nuclear gene for mitochondrial product.	6	1	7	0	0	0	0	1	1	6	2	8	0	0	0	0	0	0	0	1	1	2	10	#N/A	#N/A	#N/A
2639	NM_001081579	504991	ANKRD22	ankyrin repeat domain 22 (ANKRD22), mRNA.	4	2	6	0	0	0	2	0	2	6	2	8	0	0	0	0	0	0	1	0	1	2	10	3.04423	#N/A	#N/A
2642	NM_001081583	508893	TLE4	TLE family member 4, transcriptional corepressor (TLE4), mRNA.	9	0	9	0	0	0	0	1	1	9	1	10	0	0	0	0	0	0	0	0	0	0	10	#N/A	#N/A	#N/A
2691	NM_001081743	616179	EDA	ectodysplasin A (EDA), mRNA.	3	2	5	0	0	0	0	5	5	3	7	10	0	0	0	0	0	0	0	0	0	0	10	#N/A	#N/A	#N/A
2732	NM_001083372	504790	COG7	component of oligomeric golgi complex 7 (COG7), mRNA.	3	1	4	0	1	1	2	3	5	5	5	10	0	0	0	0	0	0	0	0	0	0	10	#N/A	#N/A	#N/A
2746	NM_001083391	508361	ELMO2	engulfment and cell motility 2 (ELMO2), mRNA.	8	2	10	0	0	0	0	0	0	8	2	10	0	0	0	0	0	0	0	0	0	0	10	#N/A	#N/A	#N/A
2773	NM_001083444	521822	FADS2	fatty acid desaturase 2 (FADS2), mRNA.	1	8	9	0	0	0	1	0	1	2	8	10	0	0	0	0	0	0	0	0	0	0	10	#N/A	#N/A	#N/A
2845	NM_001083692	515988	STAT4	signal transducer and activator of transcription 4 (STAT4), mRNA.	1	3	4	0	0	0	3	3	6	4	6	10	0	0	0	0	0	0	0	0	0	0	10	#N/A	#N/A	#N/A
2872	NM_001083745	539745	GTF2IRD2	GTF2I repeat domain containing 2 (GTF2IRD2), mRNA.	3	5	8	0	0	0	0	0	0	3	5	8	0	1	1	0	0	0	0	0	0	2	10	#N/A	#N/A	#N/A
3021	NM_001098161	787681	PPIE	peptidylprolyl isomerase E (PPIE), mRNA.	9	0	9	0	0	0	0	1	1	9	1	10	0	0	0	0	0	0	0	0	0	0	10	#N/A	#N/A	#N/A
3031	NM_001098855	282141	ANGPT2	angiopoietin 2 (ANGPT2), mRNA.	6	3	9	0	0	0	0	1	1	6	4	10	0	0	0	0	0	0	0	0	0	0	10	#N/A	#N/A	#N/A
3043	NM_001098879	505846	UTP18	UTP18 small subunit processome component (UTP18), mRNA.	1	2	3	1	0	1	3	3	6	5	5	10	0	0	0	0	0	0	0	0	0	0	10	#N/A	#N/A	#N/A
3056	NM_001098902	507526	CDH17	cadherin 17 (CDH17), mRNA.	0	1	1	0	0	0	0	9	9	0	10	10	0	0	0	0	0	0	0	0	0	0	10	-4.38567	#N/A	#N/A
3219	NM_001099216	790880	ATXN3	ataxin 3 (ATXN3), mRNA.	8	0	8	0	0	0	0	2	2	8	2	10	0	0	0	0	0	0	0	0	0	0	10	#N/A	#N/A	#N/A
3227	NM_001099378	521181	SLC15A1	solute carrier family 15 member 1 (SLC15A1), mRNA.	4	4	8	0	0	0	0	0	0	4	4	8	0	1	1	0	0	0	0	0	0	2	10	#N/A	#N/A	#N/A
3247	NM_001099719	614135	STX18	syntaxin 18 (STX18), mRNA.	5	5	10	0	0	0	0	0	0	5	5	10	0	0	0	0	0	0	0	0	0	0	10	#N/A	#N/A	#N/A
3272	NM_001100320	508051	WDR4	WD repeat domain 4 (WDR4), mRNA.	7	1	8	0	2	2	0	0	0	7	3	10	0	0	0	0	0	0	0	0	0	0	10	#N/A	#N/A	#N/A
3319	NM_001101068	509796	DPYSL3	dihydropyrimidinase like 3 (DPYSL3), mRNA.	0	9	9	0	0	0	1	0	1	1	9	10	0	0	0	0	0	0	0	0	0	0	10	#N/A	#N/A	#N/A
3323	NM_001101075	510933	AARS1	alanyl-tRNA synthetase 1 (AARS1), mRNA.	8	1	9	0	0	0	0	1	1	8	2	10	0	0	0	0	0	0	0	0	0	0	10	#N/A	#N/A	#N/A
3327	NM_001101082	512660	SEMA3C	semaphorin 3C (SEMA3C), mRNA.	0	7	7	0	0	0	1	0	1	1	7	8	0	1	1	0	0	0	0	0	0	2	10	#N/A	#N/A	#N/A
3334	NM_001101098	519461	SLC22A1	solute carrier family 22 member 1 (SLC22A1), mRNA.	5	4	9	0	0	0	0	1	1	5	5	10	0	0	0	0	0	0	0	0	0	0	10	4.30669	#N/A	#N/A
3384	NM_001101176	538564	COL8A1	collagen type VIII alpha 1 chain (COL8A1), mRNA.	5	3	8	0	0	0	0	2	2	5	5	10	0	0	0	0	0	0	0	0	0	0	10	#N/A	#N/A	#N/A
3394	NM_001101194	539494	SLC25A12	solute carrier family 25 member 12 (SLC25A12), mRNA; nuclear gene for mitochondrial product.	4	1	5	1	0	1	3	1	4	8	2	10	0	0	0	0	0	0	0	0	0	0	10	#N/A	#N/A	#N/A
3411	NM_001101242	615480	SLC35F5	solute carrier family 35 member F5 (SLC35F5), mRNA.	3	1	4	0	1	1	0	3	3	3	5	8	0	0	0	0	0	0	0	1	1	2	10	#N/A	#N/A	#N/A
3436	NM_001101292	784292	DCTD	dCMP deaminase (DCTD), mRNA.	5	5	10	0	0	0	0	0	0	5	5	10	0	0	0	0	0	0	0	0	0	0	10	#N/A	#N/A	#N/A
3444	NM_001101309	790870	LMAN2	lectin, mannose binding 2 (LMAN2), mRNA.	0	8	8	0	0	0	1	1	2	1	9	10	0	0	0	0	0	0	0	0	0	0	10	#N/A	#N/A	#N/A
3662	NM_001102203	537455	NTN4	netrin 4 (NTN4), mRNA.	3	3	6	0	0	0	1	1	2	4	4	8	0	1	1	0	0	0	0	0	0	2	10	-2.94131	#N/A	#N/A
3663	NM_001102204	537459	RIN2	Ras and Rab interactor 2 (RIN2), mRNA.	4	4	8	1	0	1	0	1	1	5	5	10	0	0	0	0	0	0	0	0	0	0	10	#N/A	#N/A	#N/A
3714	NM_001102290	615707	TRAPPC12	trafficking protein particle complex subunit 12 (TRAPPC12), mRNA.	9	0	9	0	0	0	0	1	1	9	1	10	0	0	0	0	0	0	0	0	0	0	10	#N/A	#N/A	#N/A
3732	NM_001102323	781109	MYRFL	myelin regulatory factor like (MYRFL), mRNA.	0	10	10	0	0	0	0	0	0	0	10	10	0	0	0	0	0	0	0	0	0	0	10	#N/A	#N/A	#N/A
3736	NM_001102330	783258	DCP1A	decapping mRNA 1A (DCP1A), mRNA.	9	1	10	0	0	0	0	0	0	9	1	10	0	0	0	0	0	0	0	0	0	0	10	#N/A	#N/A	#N/A
3737	NM_001102332	784362	SCEL	sciellin (SCEL), mRNA.	3	4	7	0	0	0	1	0	1	4	4	8	0	1	1	0	0	0	0	0	0	2	10	-4.06431	#N/A	#N/A
3739	NM_001102335	785045	PGM5	phosphoglucomutase 5 (PGM5), mRNA.	4	6	10	0	0	0	0	0	0	4	6	10	0	0	0	0	0	0	0	0	0	0	10	#N/A	#N/A	#N/A
3765	NM_001102490	508157	DYSF	dysferlin (DYSF), mRNA.	3	4	7	1	0	1	1	1	2	5	5	10	0	0	0	0	0	0	0	0	0	0	10	#N/A	#N/A	DYSF
3773	NM_001102500	516574	MMRN1	multimerin 1 (MMRN1), mRNA.	1	4	5	0	0	0	0	3	3	1	7	8	1	0	1	0	0	0	0	0	0	2	10	#N/A	#N/A	#N/A
3793	NM_001102529	782059	SCYL2	SCY1 like pseudokinase 2 (SCYL2), mRNA.	9	0	9	0	0	0	0	1	1	9	1	10	0	0	0	0	0	0	0	0	0	0	10	#N/A	#N/A	#N/A
3859	NM_001103287	539018	ZFP64	ZFP64 zinc finger protein (ZFP64), mRNA.	2	8	10	0	0	0	0	0	0	2	8	10	0	0	0	0	0	0	0	0	0	0	10	#N/A	#N/A	#N/A
3865	NM_001103297	614713	SLC25A26	solute carrier family 25 member 26 (SLC25A26), mRNA; nuclear gene for mitochondrial product.	5	3	8	0	1	1	1	0	1	6	4	10	0	0	0	0	0	0	0	0	0	0	10	#N/A	#N/A	#N/A
3920	NM_001105003	616246	ARHGAP15	Rho GTPase activating protein 15 (ARHGAP15), mRNA.	6	2	8	1	0	1	0	1	1	7	3	10	0	0	0	0	0	0	0	0	0	0	10	#N/A	#N/A	#N/A
3924	NM_001105009	618367	LOC618367	uncharacterized LOC618367 (LOC618367), mRNA.	2	6	8	0	0	0	0	0	0	2	6	8	0	1	1	0	0	0	0	0	0	2	10	#N/A	#N/A	LOC618367
3962	NM_001105354	510684	PPIP5K1	diphosphoinositol pentakisphosphate kinase 1 (PPIP5K1), mRNA.	1	1	2	0	0	0	0	0	0	1	1	2	0	4	4	0	0	0	0	0	0	8	10	#N/A	#N/A	#N/A
3987	NM_001105409	534176	MNAT1	MNAT1 component of CDK activating kinase (MNAT1), mRNA.	1	0	1	0	0	0	0	7	7	1	7	8	0	0	0	0	0	0	1	0	1	2	10	#N/A	#N/A	#N/A
4028	NM_001105506	100125943	PLSCR1	phospholipid scramblase 1 (PLSCR1), mRNA.	1	7	8	0	0	0	0	0	0	1	7	8	0	1	1	0	0	0	0	0	0	2	10	#N/A	#N/A	PLSCR1
4074	NM_001110002	536654	GNAQ	guanine nucleotide binding protein (G protein), q polypeptide (GNAQ), mRNA.	5	5	10	0	0	0	0	0	0	5	5	10	0	0	0	0	0	0	0	0	0	0	10	#N/A	#N/A	#N/A
4098	NM_001110772	510743	ARHGAP18	Rho GTPase activating protein 18 (ARHGAP18), mRNA.	1	6	7	2	0	2	1	0	1	4	6	10	0	0	0	0	0	0	0	0	0	0	10	#N/A	#N/A	#N/A
4199	NM_001143739	540481	TCF7L2	transcription factor 7 like 2 (TCF7L2), mRNA.	2	7	9	0	0	0	0	1	1	2	8	10	0	0	0	0	0	0	0	0	0	0	10	2.48674	#N/A	#N/A
4222	NM_001144081	537380	MAP3K5	mitogen-activated protein kinase kinase kinase 5 (MAP3K5), mRNA.	3	1	4	0	1	1	1	4	5	4	6	10	0	0	0	0	0	0	0	0	0	0	10	#N/A	#N/A	#N/A
4230	NM_001144099	533330	PRKG2	protein kinase, cGMP-dependent, type II (PRKG2), mRNA.	1	1	2	0	0	0	6	2	8	7	3	10	0	0	0	0	0	0	0	0	0	0	10	3.72539	#N/A	PRKG2
4296	NM_001166486	281020	BCL2	BCL2 apoptosis regulator (BCL2), mRNA.	7	3	10	0	0	0	0	0	0	7	3	10	0	0	0	0	0	0	0	0	0	0	10	#N/A	#N/A	#N/A
4323	NM_001166573	407174	SLC6A17	solute carrier family 6 member 17 (SLC6A17), mRNA.	0	7	7	0	0	0	3	0	3	3	7	10	0	0	0	0	0	0	0	0	0	0	10	#N/A	#N/A	#N/A
4336	NM_001167897	614920	GORAB	golgin, RAB6 interacting (GORAB), mRNA.	3	5	8	0	0	0	1	1	2	4	6	10	0	0	0	0	0	0	0	0	0	0	10	#N/A	#N/A	#N/A
4342	NM_001168406	100140158	ANO5	anoctamin 5 (ANO5), mRNA.	2	2	4	0	0	0	2	0	2	4	2	6	2	0	2	0	0	0	0	0	0	4	10	#N/A	#N/A	#N/A
4468	NM_001191343	522908	ERCC6	ERCC excision repair 6, chromatin remodeling factor (ERCC6), mRNA.	1	9	10	0	0	0	0	0	0	1	9	10	0	0	0	0	0	0	0	0	0	0	10	#N/A	#N/A	#N/A
4523	NM_001191446	507000	SLC13A5	solute carrier family 13 member 5 (SLC13A5), mRNA.	4	6	10	0	0	0	0	0	0	4	6	10	0	0	0	0	0	0	0	0	0	0	10	#N/A	#N/A	#N/A
4619	NM_001192104	282161	CACNB4	calcium voltage-gated channel auxiliary subunit beta 4 (CACNB4), mRNA.	2	7	9	1	0	1	0	0	0	3	7	10	0	0	0	0	0	0	0	0	0	0	10	#N/A	#N/A	#N/A
4687	NM_001192248	510218	ALPK2	alpha kinase 2 (ALPK2), mRNA.	6	3	9	0	0	0	0	1	1	6	4	10	0	0	0	0	0	0	0	0	0	0	10	#N/A	#N/A	#N/A
4762	NM_001192398	540310	ARHGAP35	Rho GTPase activating protein 35 (ARHGAP35), mRNA.	7	3	10	0	0	0	0	0	0	7	3	10	0	0	0	0	0	0	0	0	0	0	10	1.66828	#N/A	#N/A
4846	NM_001192543	521797	DCST1	DC-STAMP domain containing 1 (DCST1), mRNA.	7	3	10	0	0	0	0	0	0	7	3	10	0	0	0	0	0	0	0	0	0	0	10	#N/A	#N/A	#N/A
4878	NM_001192591	524132	LPP	LIM domain containing preferred translocation partner in lipoma (LPP), mRNA.	6	4	10	0	0	0	0	0	0	6	4	10	0	0	0	0	0	0	0	0	0	0	10	#N/A	#N/A	#N/A
4964	NM_001192733	532635	RCOR3	REST corepressor 3 (RCOR3), mRNA.	4	3	7	0	0	0	2	1	3	6	4	10	0	0	0	0	0	0	0	0	0	0	10	#N/A	#N/A	#N/A
4966	NM_001192735	532724	ALDH5A1	aldehyde dehydrogenase 5 family member A1 (ALDH5A1), mRNA; nuclear gene for mitochondrial product.	3	7	10	0	0	0	0	0	0	3	7	10	0	0	0	0	0	0	0	0	0	0	10	1.83835	#N/A	#N/A
5035	NM_001192833	534916	PHC3	polyhomeotic homolog 3 (PHC3), mRNA.	1	9	10	0	0	0	0	0	0	1	9	10	0	0	0	0	0	0	0	0	0	0	10	1.21925	#N/A	#N/A
5042	NM_001192842	541200	HTR5A	5-hydroxytryptamine receptor 5A (HTR5A), mRNA.	10	0	10	0	0	0	0	0	0	10	0	10	0	0	0	0	0	0	0	0	0	0	10	#N/A	#N/A	#N/A
5110	NM_001192932	538236	IPO11	importin 11 (IPO11), mRNA.	9	1	10	0	0	0	0	0	0	9	1	10	0	0	0	0	0	0	0	0	0	0	10	#N/A	#N/A	#N/A
5121	NM_001192946	512883	PTPN4	protein tyrosine phosphatase non-receptor type 4 (PTPN4), mRNA.	4	2	6	0	0	0	1	3	4	5	5	10	0	0	0	0	0	0	0	0	0	0	10	1.50912	#N/A	#N/A
5135	NM_001192966	512892	SRGAP3	SLIT-ROBO Rho GTPase activating protein 3 (SRGAP3), mRNA.	2	8	10	0	0	0	0	0	0	2	8	10	0	0	0	0	0	0	0	0	0	0	10	#N/A	#N/A	#N/A
5150	NM_001192987	539299	SPATS2L	spermatogenesis associated serine rich 2 like (SPATS2L), mRNA.	0	1	1	0	3	3	1	5	6	1	9	10	0	0	0	0	0	0	0	0	0	0	10	#N/A	#N/A	#N/A
5220	NM_001193103	616218	GALNT2	polypeptide N-acetylgalactosaminyltransferase 2 (GALNT2), mRNA.	2	3	5	0	0	0	3	2	5	5	5	10	0	0	0	0	0	0	0	0	0	0	10	-1.66601	#N/A	#N/A
5269	NM_001193177	617904	MTBP	MDM2 binding protein (MTBP), mRNA.	5	4	9	0	0	0	0	1	1	5	5	10	0	0	0	0	0	0	0	0	0	0	10	#N/A	#N/A	#N/A
5320	NM_001195030	615631	C1H3orf70	chromosome 1 C3orf70 homolog (C1H3orf70), mRNA.	5	2	7	0	2	2	0	1	1	5	5	10	0	0	0	0	0	0	0	0	0	0	10	#N/A	#N/A	#N/A
5328	NM_001199026	506218	SNX9	sorting nexin 9 (SNX9), mRNA.	0	7	7	0	0	0	2	1	3	2	8	10	0	0	0	0	0	0	0	0	0	0	10	#N/A	#N/A	#N/A
5340	NM_001205297	505696	PTPRB	protein tyrosine phosphatase, receptor type B (PTPRB), mRNA.	0	9	9	0	0	0	0	1	1	0	10	10	0	0	0	0	0	0	0	0	0	0	10	#N/A	#N/A	#N/A
5365	NM_001205395	531152	LOC531152	sodium/glucose cotransporter 1-like (LOC531152), mRNA.	1	9	10	0	0	0	0	0	0	1	9	10	0	0	0	0	0	0	0	0	0	0	10	#N/A	#N/A	#N/A
5606	NM_001205840	517425	SLC25A45	solute carrier family 25 member 45 (SLC25A45), mRNA.	0	10	10	0	0	0	0	0	0	0	10	10	0	0	0	0	0	0	0	0	0	0	10	#N/A	#N/A	#N/A
5662	NM_001205931	526582	TTPAL	alpha tocopherol transfer protein like (TTPAL), mRNA.	7	1	8	1	0	1	0	1	1	8	2	10	0	0	0	0	0	0	0	0	0	0	10	#N/A	#N/A	#N/A
5679	NM_001205960	529062	ANKRD28	ankyrin repeat domain 28 (ANKRD28), mRNA.	7	1	8	1	0	1	0	1	1	8	2	10	0	0	0	0	0	0	0	0	0	0	10	#N/A	#N/A	#N/A
5732	NM_001206044	534032	AFAP1	actin filament associated protein 1 (AFAP1), mRNA.	5	4	9	0	0	0	0	1	1	5	5	10	0	0	0	0	0	0	0	0	0	0	10	#N/A	#N/A	AFAP1
5733	NM_001206045	540924	CRTAP	cartilage associated protein (CRTAP), mRNA.	9	0	9	0	1	1	0	0	0	9	1	10	0	0	0	0	0	0	0	0	0	0	10	#N/A	#N/A	#N/A
5754	NM_001206072	535127	MYO6	myosin VI (MYO6), mRNA.	2	5	7	0	0	0	2	1	3	4	6	10	0	0	0	0	0	0	0	0	0	0	10	1.66767	#N/A	#N/A
5798	NM_001206136	510165	HPS5	HPS5 biogenesis of lysosomal organelles complex 2 subunit 2 (HPS5), mRNA.	3	3	6	0	0	0	1	1	2	4	4	8	0	0	0	0	0	0	1	0	1	2	10	#N/A	#N/A	#N/A
5907	NM_001206325	525695	LVRN	laeverin (LVRN), mRNA.	3	2	5	0	0	0	2	3	5	5	5	10	0	0	0	0	0	0	0	0	0	0	10	#N/A	#N/A	#N/A
5923	NM_001206397	509111	TP53BP1	tumor protein p53 binding protein 1 (TP53BP1), mRNA.	5	3	8	0	0	0	0	2	2	5	5	10	0	0	0	0	0	0	0	0	0	0	10	#N/A	#N/A	#N/A
5942	NM_001206458	281450	RELN	reelin (RELN), mRNA.	4	5	9	0	0	0	0	1	1	4	6	10	0	0	0	0	0	0	0	0	0	0	10	4.45476	#N/A	RELN
5957	NM_001206502	359716	DNMT3A	DNA methyltransferase 3 alpha (DNMT3A), mRNA.	2	1	3	0	0	0	0	5	5	2	6	8	0	0	0	0	0	0	0	1	1	2	10	#N/A	#N/A	#N/A
6024	NM_001206677	407110	IL13RA1	interleukin 13 receptor subunit alpha 1 (IL13RA1), mRNA.	3	1	4	0	0	0	1	5	6	4	6	10	0	0	0	0	0	0	0	0	0	0	10	#N/A	#N/A	#N/A
6047	NM_001206725	512853	MANEA	mannosidase endo-alpha (MANEA), mRNA.	0	4	4	0	0	0	5	1	6	5	5	10	0	0	0	0	0	0	0	0	0	0	10	#N/A	#N/A	#N/A
6091	NM_001206821	788312	FMNL2	formin like 2 (FMNL2), mRNA.	6	4	10	0	0	0	0	0	0	6	4	10	0	0	0	0	0	0	0	0	0	0	10	#N/A	#N/A	#N/A
6098	NM_001206834	533449	ITGBL1	integrin subunit beta like 1 (ITGBL1), mRNA.	2	7	9	0	0	0	1	0	1	3	7	10	0	0	0	0	0	0	0	0	0	0	10	#N/A	#N/A	#N/A
6115	NM_001206877	532645	MAN1A2	mannosidase alpha class 1A member 2 (MAN1A2), mRNA.	1	0	1	0	0	0	4	5	9	5	5	10	0	0	0	0	0	0	0	0	0	0	10	#N/A	#N/A	#N/A
6258	NM_001302949	789468	PAIP2B	poly(A) binding protein interacting protein 2B (PAIP2B), mRNA.	4	4	8	0	0	0	0	2	2	4	6	10	0	0	0	0	0	0	0	0	0	0	10	2.82936	#N/A	#N/A
6283	NM_001304989	506812	CPT1A	carnitine palmitoyltransferase 1A (CPT1A), mRNA.	4	6	10	0	0	0	0	0	0	4	6	10	0	0	0	0	0	0	0	0	0	0	10	-1.59958	#N/A	#N/A
6287	NM_001308660	516011	MEI1	meiotic double-stranded break formation protein 1 (MEI1), mRNA.	4	5	9	1	0	1	0	0	0	5	5	10	0	0	0	0	0	0	0	0	0	0	10	#N/A	#N/A	#N/A
6333	NM_001369918	517336	MED13L	mediator complex subunit 13L (MED13L), transcript variant 2, mRNA.	10	0	10	0	0	0	0	0	0	10	0	10	0	0	0	0	0	0	0	0	0	0	10	#N/A	#N/A	#N/A
6454	NM_174109	281299	MC2R	melanocortin 2 receptor (MC2R), mRNA.	3	1	4	0	0	0	0	0	0	3	1	4	2	1	3	0	0	0	0	0	0	6	10	#N/A	#N/A	#N/A
6503	NM_174211	281564	UGDH	UDP-glucose 6-dehydrogenase (UGDH), mRNA.	1	7	8	0	0	0	2	0	2	3	7	10	0	0	0	0	0	0	0	0	0	0	10	#N/A	#N/A	#N/A
6661	NM_174497	282133	ADORA1	adenosine A1 receptor (ADORA1), mRNA.	3	6	9	1	0	1	0	0	0	4	6	10	0	0	0	0	0	0	0	0	0	0	10	#N/A	#N/A	#N/A
6797	NM_174774	286825	WDR44	WD repeat domain 44 (WDR44), mRNA.	4	2	6	1	0	1	1	2	3	6	4	10	0	0	0	0	0	0	0	0	0	0	10	#N/A	#N/A	#N/A
6830	NM_174838	317692	ATP8A1	ATPase phospholipid transporting 8A1 (ATP8A1), mRNA.	7	3	10	0	0	0	0	0	0	7	3	10	0	0	0	0	0	0	0	0	0	0	10	#N/A	#N/A	#N/A
6842	NM_175778	281216	GUCY1A1	guanylate cyclase 1 soluble subunit alpha 1 (GUCY1A1), mRNA.	6	4	10	0	0	0	0	0	0	6	4	10	0	0	0	0	0	0	0	0	0	0	10	3.22328	#N/A	#N/A
6885	NM_177487	280887	OTC	ornithine transcarbamylase (OTC), mRNA; nuclear gene for mitochondrial product.	1	5	6	0	0	0	0	0	0	1	5	6	0	2	2	0	0	0	0	0	0	4	10	#N/A	#N/A	#N/A
6945	NM_181038	353160	ACBD5	acyl-CoA binding domain containing 5 (ACBD5), mRNA.	2	7	9	0	0	0	1	0	1	3	7	10	0	0	0	0	0	0	0	0	0	0	10	#N/A	#N/A	#N/A
5891	NM_001206300	618914	MAFK	MAF bZIP transcription factor K	0	0	0	0	0	0	0	0	0	0	0	0	2	2	4	0	0	0	1	0	1	10	10	#N/A	#N/A	#N/A
6973	NM_205796	404132	NAXE	NAD(P)HX epimerase	0	0	0	0	0	0	0	0	0	0	0	0	0	5	5	0	0	0	0	0	0	10	10	#N/A	#N/A	#N/A
16	NM_001001168	408000	SEPTIN7	septin 7 (SEPTIN7), mRNA.	3	1	4	0	0	0	3	2	5	6	3	9	0	0	0	0	0	0	0	0	0	0	9	#N/A	#N/A	#N/A
66	NM_001011678	497024	NFE2L2	nuclear factor, erythroid 2 like 2 (NFE2L2), mRNA.	4	5	9	0	0	0	0	0	0	4	5	9	0	0	0	0	0	0	0	0	0	0	9	#N/A	#N/A	#N/A
79	NM_001012671	508541	STAT3	signal transducer and activator of transcription 3 (STAT3), mRNA.	4	3	7	1	1	2	0	0	0	5	4	9	0	0	0	0	0	0	0	0	0	0	9	1.37503	#N/A	#N/A
129	NM_001014927	514745	DHCR7	7-dehydrocholesterol reductase (DHCR7), mRNA.	3	2	5	0	0	0	2	2	4	5	4	9	0	0	0	0	0	0	0	0	0	0	9	#N/A	#N/A	#N/A
216	NM_001015661	535421	ELMOD3	ELMO domain containing 3 (ELMOD3), mRNA.	2	2	4	0	0	0	2	1	3	4	3	7	0	0	0	0	0	0	0	1	1	2	9	#N/A	#N/A	#N/A
444	NM_001034451	513617	ZNF622	zinc finger protein 622 (ZNF622), mRNA.	0	8	8	0	0	0	1	0	1	1	8	9	0	0	0	0	0	0	0	0	0	0	9	#N/A	#N/A	#N/A
459	NM_001034486	515299	MED4	mediator complex subunit 4 (MED4), mRNA.	1	7	8	0	0	0	0	1	1	1	8	9	0	0	0	0	0	0	0	0	0	0	9	#N/A	#N/A	#N/A
483	NM_001034545	521987	IFI47	interferon gamma inducible protein 47 (IFI47), mRNA.	1	2	3	0	0	0	2	0	2	3	2	5	0	2	2	0	0	0	0	0	0	4	9	#N/A	#N/A	IFI47
699	NM_001035332	519302	MRPS9	mitochondrial ribosomal protein S9 (MRPS9), mRNA; nuclear gene for mitochondrial product.	3	5	8	0	0	0	1	0	1	4	5	9	0	0	0	0	0	0	0	0	0	0	9	#N/A	#N/A	#N/A
711	NM_001035351	524770	ACTN1	actinin alpha 1 (ACTN1), mRNA.	8	1	9	0	0	0	0	0	0	8	1	9	0	0	0	0	0	0	0	0	0	0	9	#N/A	#N/A	#N/A
716	NM_001035361	526135	RBMS1	RNA binding motif single stranded interacting protein 1 (RBMS1), mRNA.	3	4	7	0	0	0	0	0	0	3	4	7	1	0	1	0	0	0	0	0	0	2	9	#N/A	#N/A	#N/A
783	NM_001035498	617924	BAIAP2L2	BAR/IMD domain containing adaptor protein 2 like 2 (BAIAP2L2), mRNA.	5	0	5	0	0	0	0	2	2	5	2	7	0	0	0	0	0	0	0	1	1	2	9	#N/A	#N/A	#N/A
806	NM_001037477	535321	PPP2R1A	protein phosphatase 2 scaffold subunit Aalpha (PPP2R1A), mRNA.	5	1	6	0	1	1	0	2	2	5	4	9	0	0	0	0	0	0	0	0	0	0	9	#N/A	#N/A	#N/A
816	NM_001037591	509524	DRC1	dynein regulatory complex subunit 1 (DRC1), mRNA.	4	0	4	0	0	0	0	5	5	4	5	9	0	0	0	0	0	0	0	0	0	0	9	#N/A	#N/A	#N/A
895	NM_001038129	517478	CDKL4	cyclin dependent kinase like 4 (CDKL4), mRNA.	3	4	7	0	1	1	0	1	1	3	6	9	0	0	0	0	0	0	0	0	0	0	9	#N/A	#N/A	#N/A
908	NM_001038156	532910	LRRC28	leucine rich repeat containing 28 (LRRC28), mRNA.	4	4	8	0	0	0	0	1	1	4	5	9	0	0	0	0	0	0	0	0	0	0	9	1.83724	#N/A	#N/A
1129	NM_001046049	510197	VPS33A	VPS33A core subunit of CORVET and HOPS complexes (VPS33A), mRNA.	9	0	9	0	0	0	0	0	0	9	0	9	0	0	0	0	0	0	0	0	0	0	9	#N/A	#N/A	#N/A
1137	NM_001046065	510921	GTF2E2	general transcription factor IIE subunit 2 (GTF2E2), mRNA.	1	4	5	0	1	1	0	1	1	1	6	7	1	0	1	0	0	0	0	0	0	2	9	#N/A	#N/A	#N/A
1143	NM_001046084	511296	GAK	cyclin G associated kinase (GAK), mRNA.	4	2	6	1	0	1	0	0	0	5	2	7	0	1	1	0	0	0	0	0	0	2	9	#N/A	#N/A	#N/A
1158	NM_001046108	512069	SLX9	SLX9 ribosome biogenesis factor (SLX9), mRNA.	4	3	7	0	0	0	0	0	0	4	3	7	0	1	1	0	0	0	0	0	0	2	9	#N/A	#N/A	#N/A
1214	NM_001046240	518637	PSMC6	proteasome 26S subunit, ATPase 6 (PSMC6), mRNA.	2	0	2	0	0	0	0	1	1	2	1	3	1	0	1	0	0	0	0	2	2	6	9	#N/A	#N/A	#N/A
1229	NM_001046272	524484	TMEM184A	transmembrane protein 184A (TMEM184A), mRNA.	0	1	1	0	0	0	0	0	0	0	1	1	1	3	4	0	0	0	0	0	0	8	9	#N/A	#N/A	#N/A
1263	NM_001046340	532990	MACROH2A1	macroH2A.1 histone (MACROH2A1), mRNA.	4	5	9	0	0	0	0	0	0	4	5	9	0	0	0	0	0	0	0	0	0	0	9	#N/A	#N/A	#N/A
1328	NM_001046492	540846	ETV1	ETS variant transcription factor 1 (ETV1), mRNA.	3	0	3	0	1	1	1	4	5	4	5	9	0	0	0	0	0	0	0	0	0	0	9	-3.24413	#N/A	#N/A
1357	NM_001046543	614774	SMIM14	small integral membrane protein 14 (SMIM14), mRNA.	4	4	8	0	0	0	1	0	1	5	4	9	0	0	0	0	0	0	0	0	0	0	9	1.28768	#N/A	#N/A
1410	NM_001075169	504625	SORBS1	sorbin and SH3 domain containing 1 (SORBS1), mRNA.	4	5	9	0	0	0	0	0	0	4	5	9	0	0	0	0	0	0	0	0	0	0	9	#N/A	#N/A	#N/A
1482	NM_001075320	507549	TIMD4	T cell immunoglobulin and mucin domain containing 4 (TIMD4), mRNA.	4	0	4	0	0	0	0	5	5	4	5	9	0	0	0	0	0	0	0	0	0	0	9	#N/A	#N/A	#N/A
1483	NM_001075324	507667	EMP2	epithelial membrane protein 2 (EMP2), mRNA.	8	0	8	0	0	0	0	1	1	8	1	9	0	0	0	0	0	0	0	0	0	0	9	#N/A	#N/A	#N/A
1523	NM_001075406	509483	CEP135	centrosomal protein 135kDa (CEP135), mRNA.	0	4	4	0	0	0	2	3	5	2	7	9	0	0	0	0	0	0	0	0	0	0	9	#N/A	#N/A	#N/A
1569	NM_001075510	511319	TTLL12	tubulin tyrosine ligase like 12 (TTLL12), mRNA.	5	0	5	0	0	0	0	4	4	5	4	9	0	0	0	0	0	0	0	0	0	0	9	#N/A	#N/A	#N/A
1658	NM_001075705	515278	ELMOD2	ELMO domain containing 2 (ELMOD2), mRNA.	7	1	8	0	1	1	0	0	0	7	2	9	0	0	0	0	0	0	0	0	0	0	9	#N/A	#N/A	#N/A
1746	NM_001075877	525813	ME3	malic enzyme 3 (ME3), mRNA; nuclear gene for mitochondrial product.	7	2	9	0	0	0	0	0	0	7	2	9	0	0	0	0	0	0	0	0	0	0	9	#N/A	#N/A	#N/A
1773	NM_001075939	530813	DOK5	docking protein 5 (DOK5), mRNA.	2	7	9	0	0	0	0	0	0	2	7	9	0	0	0	0	0	0	0	0	0	0	9	#N/A	#N/A	#N/A
1851	NM_001076070	535804	OXCT1	3-oxoacid CoA-transferase 1 (OXCT1), mRNA; nuclear gene for mitochondrial product.	0	5	5	0	1	1	2	1	3	2	7	9	0	0	0	0	0	0	0	0	0	0	9	1.4019	#N/A	#N/A
1896	NM_001076155	539334	IL1RAP	interleukin 1 receptor accessory protein (IL1RAP), mRNA.	4	1	5	0	0	0	0	4	4	4	5	9	0	0	0	0	0	0	0	0	0	0	9	2.15868	#N/A	#N/A
1913	NM_001076198	540025	RERG	RAS like estrogen regulated growth inhibitor (RERG), mRNA.	1	1	2	0	0	0	2	5	7	3	6	9	0	0	0	0	0	0	0	0	0	0	9	#N/A	#N/A	#N/A
1943	NM_001076258	541130	UBE2N	ubiquitin conjugating enzyme E2 N (UBE2N), mRNA.	5	1	6	0	0	0	0	3	3	5	4	9	0	0	0	0	0	0	0	0	0	0	9	#N/A	#N/A	#N/A
1947	NM_001076264	541221	ZBTB8A	zinc finger and BTB domain containing 8A (ZBTB8A), mRNA.	3	0	3	0	0	0	0	6	6	3	6	9	0	0	0	0	0	0	0	0	0	0	9	#N/A	#N/A	#N/A
1973	NM_001076308	614061	RNF115	ring finger protein 115 (RNF115), mRNA.	2	1	3	0	0	0	3	3	6	5	4	9	0	0	0	0	0	0	0	0	0	0	9	#N/A	#N/A	#N/A
2090	NM_001076542	767817	CDC5L	cell division cycle 5 like (CDC5L), mRNA.	0	6	6	0	0	0	3	0	3	3	6	9	0	0	0	0	0	0	0	0	0	0	9	#N/A	#N/A	#N/A
2107	NM_001076814	507817	ME2	malic enzyme 2 (ME2), mRNA; nuclear gene for mitochondrial product.	2	2	4	0	0	0	0	1	1	2	3	5	2	0	2	0	0	0	0	0	0	4	9	#N/A	#N/A	#N/A
2262	NM_001077076	768017	C15H11orf97	chromosome 15 C11orf97 homolog (C15H11orf97), mRNA.	3	2	5	0	0	0	1	3	4	4	5	9	0	0	0	0	0	0	0	0	0	0	9	#N/A	#N/A	#N/A
2298	NM_001077832	286800	CACNG2	calcium voltage-gated channel auxiliary subunit gamma 2 (CACNG2), mRNA.	7	1	8	0	0	0	0	1	1	7	2	9	0	0	0	0	0	0	0	0	0	0	9	#N/A	#N/A	#N/A
2303	NM_001077837	407183	PFKFB3	6-phosphofructo-2-kinase/fructose-2,6-biphosphatase 3 (PFKFB3), mRNA.	9	0	9	0	0	0	0	0	0	9	0	9	0	0	0	0	0	0	0	0	0	0	9	#N/A	#N/A	#N/A
2309	NM_001077850	504895	BCAS1	brain enriched myelin associated protein 1 (BCAS1), mRNA.	1	4	5	0	0	0	0	0	0	1	4	5	0	2	2	0	0	0	0	0	0	4	9	#N/A	#N/A	#N/A
2341	NM_001077919	514131	BCNT2	bucentaur-2 (BCNT2), mRNA.	2	6	8	0	1	1	0	0	0	2	7	9	0	0	0	0	0	0	0	0	0	0	9	1.18356	#N/A	#N/A
2351	NM_001077933	517063	AK4	adenylate kinase 4 (AK4), mRNA; nuclear gene for mitochondrial product.	0	9	9	0	0	0	0	0	0	0	9	9	0	0	0	0	0	0	0	0	0	0	9	-1.58894	#N/A	#N/A
2407	NM_001078034	613499	R3HDM2	R3H domain containing 2 (R3HDM2), mRNA.	2	3	5	0	0	0	2	0	2	4	3	7	0	0	0	0	0	0	0	1	1	2	9	#N/A	#N/A	#N/A
2413	NM_001078046	614834	CDS2	CDP-diacylglycerol synthase 2 (CDS2), mRNA.	8	0	8	0	0	0	0	1	1	8	1	9	0	0	0	0	0	0	0	0	0	0	9	1.12187	#N/A	#N/A
2415	NM_001078056	616052	GSKIP	GSK3B interacting protein (GSKIP), mRNA.	4	4	8	0	0	0	1	0	1	5	4	9	0	0	0	0	0	0	0	0	0	0	9	#N/A	#N/A	#N/A
2436	NM_001078096	768208	AOAH	acyloxyacyl hydrolase (AOAH), mRNA.	0	3	3	0	0	0	1	5	6	1	8	9	0	0	0	0	0	0	0	0	0	0	9	#N/A	#N/A	#N/A
2468	NM_001078164	777789	CYSTM1	cysteine rich transmembrane module containing 1 (CYSTM1), mRNA.	9	0	9	0	0	0	0	0	0	9	0	9	0	0	0	0	0	0	0	0	0	0	9	#N/A	1	#N/A
2509	NM_001079775	521974	TBX15	T-box transcription factor 15 (TBX15), mRNA.	2	2	4	0	0	0	0	5	5	2	7	9	0	0	0	0	0	0	0	0	0	0	9	#N/A	#N/A	#N/A
2662	NM_001081610	539366	LRFN5	leucine rich repeat and fibronectin type III domain containing 5 (LRFN5), mRNA.	2	5	7	0	0	0	0	2	2	2	7	9	0	0	0	0	0	0	0	0	0	0	9	#N/A	#N/A	#N/A
2674	NM_001081659	408021	OASL	2'-5'-oligoadenylate synthetase like (OASL), mRNA.	5	0	5	0	0	0	0	0	0	5	0	5	2	0	2	0	0	0	0	0	0	4	9	#N/A	#N/A	#N/A
2701	NM_001082433	512405	OCLN	occludin (OCLN), mRNA.	2	5	7	1	0	1	1	0	1	4	5	9	0	0	0	0	0	0	0	0	0	0	9	#N/A	#N/A	#N/A
2843	NM_001083689	515903	FOXP1	forkhead box P1 (FOXP1), mRNA.	5	2	7	0	0	0	0	2	2	5	4	9	0	0	0	0	0	0	0	0	0	0	9	#N/A	#N/A	#N/A
2925	NM_001097995	507659	TSG101	tumor susceptibility 101 (TSG101), mRNA.	4	3	7	0	0	0	0	2	2	4	5	9	0	0	0	0	0	0	0	0	0	0	9	#N/A	#N/A	#N/A
2995	NM_001098118	540803	MRAS	muscle RAS oncogene homolog (MRAS), mRNA.	3	6	9	0	0	0	0	0	0	3	6	9	0	0	0	0	0	0	0	0	0	0	9	-2.39308	#N/A	#N/A
3004	NM_001098130	614722	AMPH	amphiphysin (AMPH), mRNA.	1	6	7	0	0	0	1	1	2	2	7	9	0	0	0	0	0	0	0	0	0	0	9	#N/A	#N/A	#N/A
3007	NM_001098137	615857	PRR11	proline rich 11 (PRR11), mRNA.	3	0	3	0	0	0	1	5	6	4	5	9	0	0	0	0	0	0	0	0	0	0	9	-3.65501	#N/A	#N/A
3044	NM_001098880	505886	IQGAP3	IQ motif containing GTPase activating protein 3 (IQGAP3), mRNA.	0	6	6	0	0	0	1	0	1	1	6	7	0	1	1	0	0	0	0	0	0	2	9	-4.01746	#N/A	#N/A
3060	NM_001098915	508999	KLC1	kinesin light chain 1 (KLC1), mRNA.	2	6	8	0	0	0	0	1	1	2	7	9	0	0	0	0	0	0	0	0	0	0	9	-1.42627	#N/A	#N/A
3073	NM_001098940	511248	NUP35	nucleoporin 35 (NUP35), mRNA.	1	4	5	0	0	0	0	0	0	1	4	5	0	2	2	0	0	0	0	0	0	4	9	#N/A	#N/A	#N/A
3124	NM_001099034	526052	TPP2	tripeptidyl peptidase 2 (TPP2), mRNA.	4	3	7	0	1	1	0	1	1	4	5	9	0	0	0	0	0	0	0	0	0	0	9	#N/A	#N/A	#N/A
3225	NM_001099376	519558	MINK1	misshapen like kinase 1 (MINK1), mRNA.	2	7	9	0	0	0	0	0	0	2	7	9	0	0	0	0	0	0	0	0	0	0	9	#N/A	#N/A	#N/A
3240	NM_001099707	525500	SDR16C6	short chain dehydrogenase/reductase family 16C, member 6 (SDR16C6), mRNA.	0	5	5	0	0	0	1	1	2	1	6	7	0	0	0	0	0	0	1	0	1	2	9	#N/A	#N/A	#N/A
3249	NM_001099725	781653	MBNL1	muscleblind like splicing regulator 1 (MBNL1), mRNA.	4	4	8	0	0	0	1	0	1	5	4	9	0	0	0	0	0	0	0	0	0	0	9	#N/A	#N/A	#N/A
3279	NM_001100329	509348	LBR	lamin B receptor (LBR), mRNA.	0	5	5	2	0	2	2	0	2	4	5	9	0	0	0	0	0	0	0	0	0	0	9	#N/A	#N/A	#N/A
3322	NM_001101072	510651	RESF1	retroelement silencing factor 1 (RESF1), mRNA.	3	3	6	0	0	0	0	3	3	3	6	9	0	0	0	0	0	0	0	0	0	0	9	#N/A	#N/A	#N/A
3383	NM_001101175	538401	ARSB	arylsulfatase B (ARSB), mRNA.	1	6	7	1	0	1	0	1	1	2	7	9	0	0	0	0	0	0	0	0	0	0	9	-1.95675	#N/A	#N/A
3410	NM_001101233	614719	TMEM117	transmembrane protein 117 (TMEM117), mRNA.	6	2	8	0	0	0	1	0	1	7	2	9	0	0	0	0	0	0	0	0	0	0	9	#N/A	#N/A	#N/A
3476	NM_001101886	507640	DDX31	DEAD-box helicase 31 (DDX31), mRNA.	7	2	9	0	0	0	0	0	0	7	2	9	0	0	0	0	0	0	0	0	0	0	9	#N/A	#N/A	#N/A
3518	NM_001101977	513579	PICALM	phosphatidylinositol binding clathrin assembly protein (PICALM), mRNA.	4	2	6	0	1	1	0	2	2	4	5	9	0	0	0	0	0	0	0	0	0	0	9	#N/A	#N/A	#N/A
3615	NM_001102127	530050	MYH11	myosin heavy chain 11 (MYH11), mRNA.	8	1	9	0	0	0	0	0	0	8	1	9	0	0	0	0	0	0	0	0	0	0	9	#N/A	#N/A	#N/A
3636	NM_001102160	533936	KLHL2	kelch like family member 2 (KLHL2), mRNA.	5	3	8	0	0	0	1	0	1	6	3	9	0	0	0	0	0	0	0	0	0	0	9	#N/A	#N/A	#N/A
3650	NM_001102180	534850	FAM171A1	family with sequence similarity 171 member A1 (FAM171A1), mRNA.	3	6	9	0	0	0	0	0	0	3	6	9	0	0	0	0	0	0	0	0	0	0	9	#N/A	#N/A	#N/A
3822	NM_001103163	100125281	TMEM26	transmembrane protein 26 (TMEM26), mRNA.	3	3	6	0	1	1	0	2	2	3	6	9	0	0	0	0	0	0	0	0	0	0	9	#N/A	#N/A	#N/A
3828	NM_001103227	494116	ST8SIA6	ST8 alpha-N-acetyl-neuraminide alpha-2,8-sialyltransferase 6 (ST8SIA6), mRNA.	6	2	8	0	0	0	0	1	1	6	3	9	0	0	0	0	0	0	0	0	0	0	9	#N/A	#N/A	#N/A
3888	NM_001103344	100125312	UBAC2	UBA domain containing 2 (UBAC2), mRNA.	6	3	9	0	0	0	0	0	0	6	3	9	0	0	0	0	0	0	0	0	0	0	9	#N/A	#N/A	#N/A
3905	NM_001104973	511424	C6H4orf19	chromosome 6 C4orf19 homolog (C6H4orf19), mRNA.	9	0	9	0	0	0	0	0	0	9	0	9	0	0	0	0	0	0	0	0	0	0	9	#N/A	#N/A	#N/A
3957	NM_001105340	507234	TRAF5	TNF receptor associated factor 5 (TRAF5), mRNA.	2	4	6	0	0	0	0	1	1	2	5	7	1	0	1	0	0	0	0	0	0	2	9	#N/A	#N/A	TRAF5
3981	NM_001105397	526748	CYB5RL	cytochrome b5 reductase-like (CYB5RL), mRNA.	9	0	9	0	0	0	0	0	0	9	0	9	0	0	0	0	0	0	0	0	0	0	9	#N/A	#N/A	#N/A
3992	NM_001105419	538792	ZNF521	zinc finger protein 521 (ZNF521), mRNA.	2	6	8	0	0	0	1	0	1	3	6	9	0	0	0	0	0	0	0	0	0	0	9	#N/A	#N/A	#N/A
4033	NM_001105619	511106	LOC511106	serpin peptidase inhibitor, clade B like (LOC511106), mRNA.	2	5	7	0	0	0	0	0	0	2	5	7	0	1	1	0	0	0	0	0	0	2	9	#N/A	#N/A	LOC511106
4045	NM_001105640	785916	PRRG1	proline rich and Gla domain 1 (PRRG1), mRNA.	4	3	7	0	0	0	2	0	2	6	3	9	0	0	0	0	0	0	0	0	0	0	9	#N/A	#N/A	#N/A
4057	NM_001109796	515377	CARD11	caspase recruitment domain family member 11 (CARD11), mRNA.	9	0	9	0	0	0	0	0	0	9	0	9	0	0	0	0	0	0	0	0	0	0	9	#N/A	#N/A	#N/A
4077	NM_001110065	505657	INTS4	integrator complex subunit 4 (INTS4), mRNA.	1	8	9	0	0	0	0	0	0	1	8	9	0	0	0	0	0	0	0	0	0	0	9	#N/A	#N/A	#N/A
4101	NM_001110785	507359	IL6R	interleukin 6 receptor (IL6R), mRNA.	7	1	8	0	0	0	0	1	1	7	2	9	0	0	0	0	0	0	0	0	0	0	9	#N/A	#N/A	#N/A
4112	NM_001113221	359718	RTN4	reticulon 4 (RTN4), transcript variant 2, mRNA.	3	4	7	0	0	0	0	0	0	3	4	7	0	1	1	0	0	0	0	0	0	2	9	-1.4789	#N/A	#N/A
4141	NM_001113745	504472	DNAJC13	DnaJ heat shock protein family (Hsp40) member C13 (DNAJC13), mRNA.	4	4	8	0	0	0	1	0	1	5	4	9	0	0	0	0	0	0	0	0	0	0	9	#N/A	#N/A	#N/A
4155	NM_001114189	504366	SI	sucrase-isomaltase (SI), mRNA.	0	1	1	0	0	0	5	3	8	5	4	9	0	0	0	0	0	0	0	0	0	0	9	#N/A	#N/A	#N/A
4215	NM_001143871	514597	CLCN1	chloride voltage-gated channel 1 (CLCN1), mRNA.	5	3	8	0	1	1	0	0	0	5	4	9	0	0	0	0	0	0	0	0	0	0	9	#N/A	#N/A	#N/A
4217	NM_001143875	517950	ADGRF4	adhesion G protein-coupled receptor F4 (ADGRF4), mRNA.	2	0	2	0	2	2	0	1	1	2	3	5	1	0	1	0	0	0	0	1	1	4	9	#N/A	#N/A	#N/A
4330	NM_001166615	511224	NFATC1	nuclear factor of activated T cells 1 (NFATC1), mRNA.	2	7	9	0	0	0	0	0	0	2	7	9	0	0	0	0	0	0	0	0	0	0	9	#N/A	#N/A	#N/A
4424	NM_001191250	789054	SESTD1	SEC14 and spectrin domain containing 1 (SESTD1), mRNA.	3	5	8	0	1	1	0	0	0	3	6	9	0	0	0	0	0	0	0	0	0	0	9	1.58779	#N/A	#N/A
4428	NM_001191263	517059	SGCD	sarcoglycan delta (SGCD), mRNA.	8	1	9	0	0	0	0	0	0	8	1	9	0	0	0	0	0	0	0	0	0	0	9	#N/A	#N/A	#N/A
4432	NM_001191270	100140477	KLF12	Kruppel-like factor 12 (KLF12), mRNA.	5	2	7	0	2	2	0	0	0	5	4	9	0	0	0	0	0	0	0	0	0	0	9	#N/A	#N/A	#N/A
4474	NM_001191352	784202	PPP1R1C	protein phosphatase 1 regulatory inhibitor subunit 1C (PPP1R1C), mRNA.	1	5	6	0	1	1	1	1	2	2	7	9	0	0	0	0	0	0	0	0	0	0	9	#N/A	#N/A	#N/A
4545	NM_001191491	281406	PKP4	plakophilin 4 (PKP4), mRNA.	3	6	9	0	0	0	0	0	0	3	6	9	0	0	0	0	0	0	0	0	0	0	9	#N/A	#N/A	#N/A
4553	NM_001191504	407104	PLXNA4	plexin A4 (PLXNA4), mRNA.	8	1	9	0	0	0	0	0	0	8	1	9	0	0	0	0	0	0	0	0	0	0	9	#N/A	#N/A	#N/A
4554	NM_001191506	540105	FMNL3	formin like 3 (FMNL3), mRNA.	4	1	5	0	1	1	0	3	3	4	5	9	0	0	0	0	0	0	0	0	0	0	9	#N/A	#N/A	#N/A
4611	NM_001192087	506260	ARHGAP32	Rho GTPase activating protein 32 (ARHGAP32), mRNA.	1	4	5	0	1	1	2	1	3	3	6	9	0	0	0	0	0	0	0	0	0	0	9	#N/A	#N/A	#N/A
4673	NM_001192209	509065	RGSL1	regulator of G protein signaling like 1 (RGSL1), mRNA.	0	8	8	0	0	0	1	0	1	1	8	9	0	0	0	0	0	0	0	0	0	0	9	#N/A	#N/A	#N/A
4769	NM_001192410	515385	FABP9	fatty acid binding protein 9 (FABP9), mRNA.	0	3	3	0	0	0	0	0	0	0	3	3	0	2	2	0	0	0	1	0	1	6	9	#N/A	#N/A	#N/A
4789	NM_001192449	516644	NCAPG2	non-SMC condensin II complex subunit G2 (NCAPG2), mRNA.	6	2	8	0	0	0	0	1	1	6	3	9	0	0	0	0	0	0	0	0	0	0	9	-2.88367	#N/A	#N/A
4798	NM_001192465	517232	RECK	reversion inducing cysteine rich protein with kazal motifs (RECK), mRNA.	1	1	2	0	0	0	6	1	7	7	2	9	0	0	0	0	0	0	0	0	0	0	9	#N/A	#N/A	#N/A
4800	NM_001192471	517397	AGL	amylo-alpha-1, 6-glucosidase, 4-alpha-glucanotransferase (AGL), mRNA.	0	6	6	0	1	1	2	0	2	2	7	9	0	0	0	0	0	0	0	0	0	0	9	#N/A	#N/A	#N/A
4829	NM_001192514	519739	GPAT3	glycerol-3-phosphate acyltransferase 3 (GPAT3), mRNA.	0	0	0	2	0	2	2	5	7	4	5	9	0	0	0	0	0	0	0	0	0	0	9	#N/A	#N/A	GPAT3
4874	NM_001192586	407210	GRB10	growth factor receptor bound protein 10 (GRB10), mRNA.	2	6	8	0	0	0	0	1	1	2	7	9	0	0	0	0	0	0	0	0	0	0	9	#N/A	#N/A	#N/A
4884	NM_001192600	524648	HOOK3	hook microtubule tethering protein 3 (HOOK3), mRNA.	8	1	9	0	0	0	0	0	0	8	1	9	0	0	0	0	0	0	0	0	0	0	9	#N/A	#N/A	#N/A
4921	NM_001192659	528416	NTSR1	neurotensin receptor 1 (NTSR1), mRNA.	1	4	5	0	0	0	0	0	0	1	4	5	1	0	1	0	0	0	0	1	1	4	9	#N/A	#N/A	#N/A
4951	NM_001192712	531927	FARP1	FERM, ARH/RhoGEF and pleckstrin domain protein 1 (FARP1), mRNA.	3	5	8	0	0	0	1	0	1	4	5	9	0	0	0	0	0	0	0	0	0	0	9	#N/A	#N/A	#N/A
4959	NM_001192726	538797	EPHA7	EPH receptor A7 (EPHA7), mRNA.	0	0	0	1	0	1	4	4	8	5	4	9	0	0	0	0	0	0	0	0	0	0	9	#N/A	#N/A	#N/A
5043	NM_001192843	541204	ATF7	activating transcription factor 7 (ATF7), mRNA.	5	3	8	0	0	0	0	1	1	5	4	9	0	0	0	0	0	0	0	0	0	0	9	#N/A	#N/A	#N/A
5047	NM_001192847	541240	SLC16A10	solute carrier family 16 member 10 (SLC16A10), mRNA.	7	2	9	0	0	0	0	0	0	7	2	9	0	0	0	0	0	0	0	0	0	0	9	#N/A	#N/A	#N/A
5203	NM_001193078	534306	MADD	MAP kinase activating death domain (MADD), mRNA.	0	6	6	0	0	0	3	0	3	3	6	9	0	0	0	0	0	0	0	0	0	0	9	#N/A	#N/A	#N/A
5261	NM_001193163	617525	LIMD1	LIM domain containing 1 (LIMD1), mRNA.	5	4	9	0	0	0	0	0	0	5	4	9	0	0	0	0	0	0	0	0	0	0	9	#N/A	#N/A	#N/A
5273	NM_001193184	618126	RNF175	ring finger protein 175 (RNF175), mRNA.	4	3	7	0	0	0	0	2	2	4	5	9	0	0	0	0	0	0	0	0	0	0	9	#N/A	#N/A	#N/A
5296	NM_001193228	537016	CPEB3	cytoplasmic polyadenylation element binding protein 3 (CPEB3), mRNA.	1	8	9	0	0	0	0	0	0	1	8	9	0	0	0	0	0	0	0	0	0	0	9	2.76117	#N/A	#N/A
5338	NM_001205289	504611	EPS8L3	EPS8-like 3 (EPS8L3), mRNA.	0	2	2	0	0	0	2	1	3	2	3	5	0	2	2	0	0	0	0	0	0	4	9	#N/A	#N/A	#N/A
5356	NM_001205372	514951	RBFOX2	RNA binding fox-1 homolog 2 (RBFOX2), mRNA.	1	6	7	0	0	0	2	0	2	3	6	9	0	0	0	0	0	0	0	0	0	0	9	#N/A	#N/A	#N/A
5386	NM_001205436	783217	MLXIP	MLX interacting protein (MLXIP), transcript variant 2, mRNA.	5	1	6	0	1	1	0	0	0	5	2	7	0	0	0	0	0	0	0	1	1	2	9	1.25586	#N/A	#N/A
5404	NM_001205470	100140797	RMC1	regulator of MON1-CCZ1 (RMC1), mRNA.	7	0	7	0	0	0	0	0	0	7	0	7	0	0	0	1	0	1	0	0	0	2	9	#N/A	#N/A	#N/A
5556	NM_001205757	513478	IL10RA	interleukin 10 receptor subunit alpha (IL10RA), mRNA.	2	6	8	0	0	0	0	1	1	2	7	9	0	0	0	0	0	0	0	0	0	0	9	1.14682	#N/A	#N/A
5571	NM_001205781	514205	SAMD9	sterile alpha motif domain containing 9 (SAMD9), mRNA.	5	0	5	0	0	0	0	0	0	5	0	5	0	2	2	0	0	0	0	0	0	4	9	2.81484	1	#N/A
5644	NM_001205896	522382	CNNM4	cyclin and CBS domain divalent metal cation transport mediator 4 (CNNM4), mRNA.	4	5	9	0	0	0	0	0	0	4	5	9	0	0	0	0	0	0	0	0	0	0	9	#N/A	#N/A	#N/A
5664	NM_001205933	526726	SDR16C5	short chain dehydrogenase/reductase family 16C member 5 (SDR16C5), mRNA.	5	3	8	0	1	1	0	0	0	5	4	9	0	0	0	0	0	0	0	0	0	0	9	#N/A	#N/A	#N/A
5666	NM_001205935	526824	ATM	ATM serine/threonine kinase (ATM), mRNA.	1	8	9	0	0	0	0	0	0	1	8	9	0	0	0	0	0	0	0	0	0	0	9	#N/A	#N/A	#N/A
5670	NM_001205939	527058	RLF	RLF zinc finger (RLF), mRNA.	2	4	6	1	0	1	0	0	0	3	4	7	0	1	1	0	0	0	0	0	0	2	9	1.5979	#N/A	#N/A
5739	NM_001206054	534359	CLVS2	clavesin 2 (CLVS2), mRNA.	2	7	9	0	0	0	0	0	0	2	7	9	0	0	0	0	0	0	0	0	0	0	9	#N/A	#N/A	#N/A
5753	NM_001206070	541192	SATB2	SATB homeobox 2 (SATB2), mRNA.	0	1	1	0	0	0	1	7	8	1	8	9	0	0	0	0	0	0	0	0	0	0	9	#N/A	#N/A	#N/A
5813	NM_001206159	513431	EXOC2	exocyst complex component 2 (EXOC2), mRNA.	2	6	8	0	0	0	1	0	1	3	6	9	0	0	0	0	0	0	0	0	0	0	9	#N/A	#N/A	#N/A
5893	NM_001206303	519943	FAM76B	family with sequence similarity 76 member B (FAM76B), mRNA.	1	6	7	0	0	0	2	0	2	3	6	9	0	0	0	0	0	0	0	0	0	0	9	#N/A	#N/A	#N/A
5954	NM_001206497	359712	COL12A1	collagen type XII alpha 1 chain (COL12A1), mRNA.	4	5	9	0	0	0	0	0	0	4	5	9	0	0	0	0	0	0	0	0	0	0	9	#N/A	#N/A	#N/A
5985	NM_001206563	536610	UNC80	unc-80 homolog, NALCN channel complex subunit (UNC80), mRNA.	0	1	1	1	0	1	3	4	7	4	5	9	0	0	0	0	0	0	0	0	0	0	9	#N/A	#N/A	#N/A
6025	NM_001206679	407177	STAB2	stabilin 2 (STAB2), mRNA.	1	7	8	0	0	0	1	0	1	2	7	9	0	0	0	0	0	0	0	0	0	0	9	#N/A	#N/A	#N/A
6117	NM_001206892	537776	DEUP1	deuterosome assembly protein 1 (DEUP1), mRNA.	0	9	9	0	0	0	0	0	0	0	9	9	0	0	0	0	0	0	0	0	0	0	9	#N/A	#N/A	#N/A
6157	NM_001243300	524776	CHD6	chromodomain helicase DNA binding protein 6 (CHD6), mRNA.	4	5	9	0	0	0	0	0	0	4	5	9	0	0	0	0	0	0	0	0	0	0	9	#N/A	#N/A	#N/A
6173	NM_001244204	508763	TFPI	tissue factor pathway inhibitor (TFPI), mRNA.	0	1	1	1	0	1	0	3	3	1	4	5	1	1	2	0	0	0	0	0	0	4	9	#N/A	#N/A	#N/A
6187	NM_001244612	281848	IGF1R	insulin like growth factor 1 receptor (IGF1R), mRNA.	3	6	9	0	0	0	0	0	0	3	6	9	0	0	0	0	0	0	0	0	0	0	9	#N/A	#N/A	#N/A
6195	NM_001255973	100848905	SLX4IP	SLX4 interacting protein (SLX4IP), mRNA.	0	2	2	0	0	0	3	4	7	3	6	9	0	0	0	0	0	0	0	0	0	0	9	#N/A	#N/A	#N/A
6228	NM_001281903	533581	CMYA5	cardiomyopathy associated 5 (CMYA5), mRNA.	1	8	9	0	0	0	0	0	0	1	8	9	0	0	0	0	0	0	0	0	0	0	9	#N/A	#N/A	#N/A
6232	NM_001281915	100296926	SPINT3	serine peptidase inhibitor, Kunitz type 3 (SPINT3), mRNA.	1	2	3	0	0	0	0	0	0	1	2	3	1	2	3	0	0	0	0	0	0	6	9	#N/A	#N/A	#N/A
6274	NM_001304576	540193	CFAP53	cilia and flagella associated protein 53 (CFAP53), mRNA.	6	2	8	1	0	1	0	0	0	7	2	9	0	0	0	0	0	0	0	0	0	0	9	#N/A	#N/A	#N/A
6335	NM_173877	280685	F2	coagulation factor II, thrombin (F2), mRNA.	1	6	7	0	1	1	1	0	1	2	7	9	0	0	0	0	0	0	0	0	0	0	9	#N/A	#N/A	#N/A
6351	NM_173903	280753	CPE	carboxypeptidase E (CPE), mRNA.	0	9	9	0	0	0	0	0	0	0	9	9	0	0	0	0	0	0	0	0	0	0	9	#N/A	#N/A	#N/A
6376	NM_173948	280890	PAM	peptidylglycine alpha-amidating monooxygenase (PAM), mRNA.	5	2	7	0	0	0	1	1	2	6	3	9	0	0	0	0	0	0	0	0	0	0	9	-1.1803	#N/A	#N/A
6457	NM_174120	281346	NCF2	neutrophil cytosolic factor 2 (NCF2), mRNA.	4	3	7	0	0	0	0	0	0	4	3	7	0	1	1	0	0	0	0	0	0	2	9	-1.83282	#N/A	#N/A
6490	NM_174190	281509	SVIL	supervillin (SVIL), mRNA.	5	4	9	0	0	0	0	0	0	5	4	9	0	0	0	0	0	0	0	0	0	0	9	#N/A	#N/A	#N/A
6611	NM_174406	281956	NXPH2	neurexophilin 2 (NXPH2), mRNA.	0	0	0	1	1	2	3	4	7	4	5	9	0	0	0	0	0	0	0	0	0	0	9	#N/A	#N/A	#N/A
6639	NM_174452	282041	ROCK2	Rho associated coiled-coil containing protein kinase 2 (ROCK2), mRNA.	2	7	9	0	0	0	0	0	0	2	7	9	0	0	0	0	0	0	0	0	0	0	9	#N/A	#N/A	#N/A
6663	NM_174500	282136	GRK3	G protein-coupled receptor kinase 3 (GRK3), mRNA.	6	2	8	0	1	1	0	0	0	6	3	9	0	0	0	0	0	0	0	0	0	0	9	-1.35155	#N/A	#N/A
6818	NM_174816	287025	GPLD1	glycosylphosphatidylinositol specific phospholipase D1 (GPLD1), mRNA.	0	9	9	0	0	0	0	0	0	0	9	9	0	0	0	0	0	0	0	0	0	0	9	#N/A	#N/A	#N/A
6827	NM_174834	317655	MYH10	myosin heavy chain 10 (MYH10), mRNA.	5	2	7	2	0	2	0	0	0	7	2	9	0	0	0	0	0	0	0	0	0	0	9	#N/A	#N/A	#N/A
6848	NM_175789	327667	CACNB2	calcium voltage-gated channel auxiliary subunit beta 2 (CACNB2), mRNA.	0	8	8	0	0	0	1	0	1	1	8	9	0	0	0	0	0	0	0	0	0	0	9	#N/A	#N/A	#N/A
6854	NM_175808	327689	CPSF2	cleavage and polyadenylation specific factor 2 (CPSF2), mRNA.	6	1	7	0	0	0	0	2	2	6	3	9	0	0	0	0	0	0	0	0	0	0	9	#N/A	#N/A	#N/A
6858	NM_175830	327717	NDUFV3	NADH:ubiquinone oxidoreductase subunit V3 (NDUFV3), mRNA; nuclear gene for mitochondrial product.	5	2	7	0	2	2	0	0	0	5	4	9	0	0	0	0	0	0	0	0	0	0	9	#N/A	#N/A	#N/A
6901	NM_177511	281780	GGTA1	alpha-galactosyltransferase 1 (glycoprotein) (GGTA1), mRNA.	6	1	7	0	0	0	0	0	0	6	1	7	0	1	1	0	0	0	0	0	0	2	9	-1.88767	#N/A	#N/A
6951	NM_182987	360195	FUT10	fucosyltransferase 10 (FUT10), mRNA.	2	1	3	0	0	0	2	2	4	4	3	7	0	1	1	0	0	0	0	0	0	2	9	#N/A	#N/A	#N/A
27	NM_001001598	414348	P4HA3	prolyl 4-hydroxylase subunit alpha 3 (P4HA3), mRNA.	3	2	5	0	0	0	3	0	3	6	2	8	0	0	0	0	0	0	0	0	0	0	8	#N/A	#N/A	#N/A
40	NM_001003900	281555	TUBB2B	tubulin, beta 2B class IIb (TUBB2B), mRNA.	1	7	8	0	0	0	0	0	0	1	7	8	0	0	0	0	0	0	0	0	0	0	8	-3.20348	#N/A	#N/A
48	NM_001007809	493643	HSD17B4	hydroxysteroid 17-beta dehydrogenase 4 (HSD17B4), mRNA.	0	0	0	0	0	0	4	4	8	4	4	8	0	0	0	0	0	0	0	0	0	0	8	#N/A	#N/A	#N/A
86	NM_001013004	281767	FDFT1	farnesyl-diphosphate farnesyltransferase 1 (FDFT1), mRNA.	2	4	6	1	0	1	1	0	1	4	4	8	0	0	0	0	0	0	0	0	0	0	8	#N/A	#N/A	#N/A
165	NM_001015554	509047	TTC4	tetratricopeptide repeat domain 4 (TTC4), mRNA.	5	0	5	0	1	1	0	0	0	5	1	6	0	0	0	1	0	1	0	0	0	2	8	#N/A	#N/A	#N/A
185	NM_001015594	514000	ARMC1	armadillo repeat containing 1 (ARMC1), mRNA.	5	0	5	0	0	0	0	1	1	5	1	6	0	0	0	0	0	0	0	1	1	2	8	#N/A	#N/A	#N/A
250	NM_001024501	508229	MYO19	myosin XIX (MYO19), mRNA.	0	4	4	0	0	0	4	0	4	4	4	8	0	0	0	0	0	0	0	0	0	0	8	#N/A	#N/A	#N/A
266	NM_001024533	513589	SLA	Src like adaptor (SLA), mRNA.	3	2	5	0	3	3	0	0	0	3	5	8	0	0	0	0	0	0	0	0	0	0	8	1.71197	#N/A	#N/A
267	NM_001024542	514793	POLA2	DNA polymerase alpha 2, accessory subunit (POLA2), mRNA.	5	2	7	0	1	1	0	0	0	5	3	8	0	0	0	0	0	0	0	0	0	0	8	#N/A	#N/A	#N/A
350	NM_001034216	504583	PIGS	phosphatidylinositol glycan anchor biosynthesis class S (PIGS), mRNA.	5	1	6	0	1	1	0	1	1	5	3	8	0	0	0	0	0	0	0	0	0	0	8	#N/A	#N/A	#N/A
368	NM_001034256	505736	COA1	cytochrome c oxidase assembly factor 1 (COA1), mRNA.	0	6	6	0	0	0	1	1	2	1	7	8	0	0	0	0	0	0	0	0	0	0	8	1.95546	#N/A	#N/A
393	NM_001034325	508617	KIAA1191	KIAA1191 (KIAA1191), mRNA.	0	4	4	0	0	0	2	0	2	2	4	6	1	0	1	0	0	0	0	0	0	2	8	#N/A	#N/A	#N/A
667	NM_001035276	509602	ERCC5	ERCC excision repair 5, endonuclease (ERCC5), mRNA.	2	2	4	0	0	0	0	0	0	2	2	4	0	0	0	0	0	0	1	1	2	4	8	2.21307	#N/A	#N/A
691	NM_001035317	516456	MVP	major vault protein (MVP), mRNA.	4	0	4	0	0	0	1	1	2	5	1	6	0	0	0	0	0	0	1	0	1	2	8	#N/A	#N/A	#N/A
741	NM_001035413	535740	APMAP	adipocyte plasma membrane associated protein (APMAP), mRNA.	8	0	8	0	0	0	0	0	0	8	0	8	0	0	0	0	0	0	0	0	0	0	8	#N/A	#N/A	#N/A
758	NM_001035450	614519	MORN4	MORN repeat containing 4 (MORN4), mRNA.	0	6	6	0	0	0	0	0	0	0	6	6	1	0	1	0	0	0	0	0	0	2	8	#N/A	#N/A	#N/A
760	NM_001035454	614639	MRPL22	mitochondrial ribosomal protein L22 (MRPL22), mRNA; nuclear gene for mitochondrial product.	3	2	5	0	0	0	0	1	1	3	3	6	1	0	1	0	0	0	0	0	0	2	8	#N/A	#N/A	MRPL22
825	NM_001037617	540784	C1H21orf91	chromosome 1 C21orf91 homolog (C1H21orf91), mRNA.	0	6	6	0	0	0	2	0	2	2	6	8	0	0	0	0	0	0	0	0	0	0	8	#N/A	#N/A	#N/A
826	NM_001037618	613457	C2H2orf76	chromosome 2 C2orf76 homolog (C2H2orf76), mRNA.	0	2	2	6	0	6	0	0	0	6	2	8	0	0	0	0	0	0	0	0	0	0	8	#N/A	#N/A	#N/A
883	NM_001038108	514740	MRPS27	mitochondrial ribosomal protein S27 (MRPS27), mRNA; nuclear gene for mitochondrial product.	3	3	6	0	0	0	0	0	0	3	3	6	0	1	1	0	0	0	0	0	0	2	8	#N/A	#N/A	#N/A
918	NM_001038183	539381	CSRP2	cysteine and glycine rich protein 2 (CSRP2), mRNA.	5	0	5	0	1	1	0	2	2	5	3	8	0	0	0	0	0	0	0	0	0	0	8	#N/A	#N/A	#N/A
940	NM_001038224	618880	VRK1	VRK serine/threonine kinase 1 (VRK1), mRNA.	6	2	8	0	0	0	0	0	0	6	2	8	0	0	0	0	0	0	0	0	0	0	8	#N/A	#N/A	#N/A
982	NM_001038684	614139	ELP4	elongator acetyltransferase complex subunit 4 (ELP4), mRNA.	1	5	6	0	1	1	1	0	1	2	6	8	0	0	0	0	0	0	0	0	0	0	8	#N/A	#N/A	#N/A
1021	NM_001040546	525389	MED27	mediator complex subunit 27 (MED27), mRNA.	7	1	8	0	0	0	0	0	0	7	1	8	0	0	0	0	0	0	0	0	0	0	8	#N/A	#N/A	#N/A
1027	NM_001040571	613509	DYDC1	DPY30 domain containing 1 (DYDC1), mRNA.	2	2	4	0	2	2	0	2	2	2	6	8	0	0	0	0	0	0	0	0	0	0	8	#N/A	#N/A	#N/A
1036	NM_001040595	616647	MCFD2	multiple coagulation factor deficiency 2, ER cargo receptor complex subunit (MCFD2), mRNA.	2	4	6	0	0	0	1	1	2	3	5	8	0	0	0	0	0	0	0	0	0	0	8	#N/A	#N/A	#N/A
1160	NM_001046113	512254	MEF2C	myocyte enhancer factor 2C (MEF2C), mRNA.	6	2	8	0	0	0	0	0	0	6	2	8	0	0	0	0	0	0	0	0	0	0	8	-1.78053	#N/A	#N/A
1162	NM_001046122	512466	BCCIP	BRCA2 and CDKN1A interacting protein (BCCIP), mRNA.	2	0	2	0	0	0	0	0	0	2	0	2	2	0	2	0	0	0	0	1	1	6	8	#N/A	#N/A	#N/A
1171	NM_001046142	513231	GTF2B	general transcription factor IIB (GTF2B), mRNA.	6	0	6	0	0	0	0	2	2	6	2	8	0	0	0	0	0	0	0	0	0	0	8	1.50972	#N/A	GTF2B
1202	NM_001046210	515700	IL1R2	interleukin 1 receptor type 2 (IL1R2), mRNA.	5	3	8	0	0	0	0	0	0	5	3	8	0	0	0	0	0	0	0	0	0	0	8	3.2792	#N/A	#N/A
1218	NM_001046251	520302	VRK3	VRK serine/threonine kinase 3 (VRK3), mRNA.	6	0	6	0	0	0	0	0	0	6	0	6	1	0	1	0	0	0	0	0	0	2	8	#N/A	#N/A	#N/A
1224	NM_001046266	523294	GLT8D2	glycosyltransferase 8 domain containing 2 (GLT8D2), mRNA.	2	2	4	0	0	0	0	0	0	2	2	4	0	0	0	0	0	0	0	2	2	4	8	#N/A	#N/A	#N/A
1228	NM_001046271	524184	ECD	ecdysoneless cell cycle regulator (ECD), mRNA.	2	4	6	0	0	0	2	0	2	4	4	8	0	0	0	0	0	0	0	0	0	0	8	#N/A	#N/A	#N/A
1251	NM_001046326	532560	SLC25A15	solute carrier family 25 member 15 (SLC25A15), mRNA; nuclear gene for mitochondrial product.	8	0	8	0	0	0	0	0	0	8	0	8	0	0	0	0	0	0	0	0	0	0	8	#N/A	#N/A	#N/A
1335	NM_001046500	541168	SLC25A31	solute carrier family 25 member 31 (SLC25A31), mRNA.	0	4	4	0	0	0	2	0	2	2	4	6	1	0	1	0	0	0	0	0	0	2	8	#N/A	#N/A	#N/A
1351	NM_001046537	614498	PPIL6	peptidylprolyl isomerase like 6 (PPIL6), mRNA.	0	4	4	1	0	1	3	0	3	4	4	8	0	0	0	0	0	0	0	0	0	0	8	#N/A	#N/A	#N/A
1352	NM_001046538	614507	RAB15	RAB15, member RAS oncogene family (RAB15), mRNA.	1	3	4	0	0	0	4	0	4	5	3	8	0	0	0	0	0	0	0	0	0	0	8	2.58163	#N/A	#N/A
1358	NM_001046550	615106	ENOSF1	enolase superfamily member 1 (ENOSF1), mRNA; nuclear gene for mitochondrial product.	1	5	6	0	0	0	2	0	2	3	5	8	0	0	0	0	0	0	0	0	0	0	8	#N/A	#N/A	ENOSF1
1463	NM_001075280	506802	PLA2G16	phospholipase A2, group XVI (PLA2G16), mRNA.	2	3	5	0	0	0	0	1	1	2	4	6	1	0	1	0	0	0	0	0	0	2	8	#N/A	#N/A	#N/A
1480	NM_001075317	507488	RAB21	RAB21, member RAS oncogene family (RAB21), mRNA.	4	2	6	0	1	1	0	1	1	4	4	8	0	0	0	0	0	0	0	0	0	0	8	#N/A	#N/A	#N/A
1520	NM_001075403	509418	CSF1R	colony stimulating factor 1 receptor (CSF1R), mRNA.	6	2	8	0	0	0	0	0	0	6	2	8	0	0	0	0	0	0	0	0	0	0	8	-1.88564	#N/A	#N/A
1556	NM_001075486	511042	NMNAT2	nicotinamide nucleotide adenylyltransferase 2 (NMNAT2), mRNA.	0	8	8	0	0	0	0	0	0	0	8	8	0	0	0	0	0	0	0	0	0	0	8	#N/A	#N/A	#N/A
1595	NM_001075577	512667	ADAL	adenosine deaminase like (ADAL), mRNA.	4	4	8	0	0	0	0	0	0	4	4	8	0	0	0	0	0	0	0	0	0	0	8	#N/A	#N/A	#N/A
1606	NM_001075601	513155	MMD	monocyte to macrophage differentiation associated (MMD), mRNA.	1	3	4	0	0	0	1	1	2	2	4	6	0	0	0	0	0	0	0	1	1	2	8	#N/A	#N/A	#N/A
1617	NM_001075621	513451	SRSF11	serine and arginine rich splicing factor 11 (SRSF11), mRNA.	0	7	7	0	0	0	1	0	1	1	7	8	0	0	0	0	0	0	0	0	0	0	8	#N/A	#N/A	#N/A
1627	NM_001075640	513868	PRPF19	pre-mRNA processing factor 19 (PRPF19), mRNA.	1	3	4	0	0	0	0	0	0	1	3	4	2	0	2	0	0	0	0	0	0	4	8	#N/A	#N/A	#N/A
1675	NM_001075754	517505	C25H7orf26	chromosome 25 C7orf26 homolog (C25H7orf26), mRNA.	0	8	8	0	0	0	0	0	0	0	8	8	0	0	0	0	0	0	0	0	0	0	8	#N/A	#N/A	#N/A
1735	NM_001075862	524908	TTC27	tetratricopeptide repeat domain 27 (TTC27), mRNA.	4	4	8	0	0	0	0	0	0	4	4	8	0	0	0	0	0	0	0	0	0	0	8	#N/A	#N/A	#N/A
1753	NM_001075895	527152	LMO1	LIM domain only 1 (LMO1), mRNA.	0	6	6	1	0	1	1	0	1	2	6	8	0	0	0	0	0	0	0	0	0	0	8	#N/A	#N/A	#N/A
1763	NM_001075920	529183	MAPK4	mitogen-activated protein kinase 4 (MAPK4), mRNA.	7	1	8	0	0	0	0	0	0	7	1	8	0	0	0	0	0	0	0	0	0	0	8	2.27732	#N/A	#N/A
1818	NM_001076020	534328	CADPS	calcium dependent secretion activator (CADPS), mRNA.	0	8	8	0	0	0	0	0	0	0	8	8	0	0	0	0	0	0	0	0	0	0	8	#N/A	#N/A	#N/A
1836	NM_001076045	535021	LACTB2	lactamase beta 2 (LACTB2), mRNA.	4	2	6	0	0	0	0	0	0	4	2	6	0	0	0	1	0	1	0	0	0	2	8	#N/A	#N/A	#N/A
1854	NM_001076075	536409	PAPSS2	3'-phosphoadenosine 5'-phosphosulfate synthase 2 (PAPSS2), mRNA.	0	8	8	0	0	0	0	0	0	0	8	8	0	0	0	0	0	0	0	0	0	0	8	#N/A	#N/A	#N/A
1884	NM_001076126	538743	USP8	ubiquitin specific peptidase 8 (USP8), mRNA.	0	3	3	0	1	1	2	0	2	2	4	6	0	0	0	0	0	0	0	1	1	2	8	#N/A	#N/A	#N/A
1904	NM_001076171	539530	TTLL1	tubulin tyrosine ligase like 1 (TTLL1), mRNA.	3	1	4	0	0	0	0	2	2	3	3	6	0	0	0	0	0	0	0	1	1	2	8	#N/A	#N/A	#N/A
1914	NM_001076199	540039	NPTN	neuroplastin (NPTN), mRNA.	3	5	8	0	0	0	0	0	0	3	5	8	0	0	0	0	0	0	0	0	0	0	8	#N/A	#N/A	#N/A
1950	NM_001076269	613317	CALCR	calcitonin receptor (CALCR), mRNA.	0	6	6	2	0	2	0	0	0	2	6	8	0	0	0	0	0	0	0	0	0	0	8	#N/A	#N/A	#N/A
1968	NM_001076303	613991	COLEC11	collectin subfamily member 11 (COLEC11), mRNA.	2	5	7	0	0	0	1	0	1	3	5	8	0	0	0	0	0	0	0	0	0	0	8	#N/A	#N/A	#N/A
2057	NM_001076471	617655	ILRUN	inflammation and lipid regulator with UBA-like and NBR1-like domains (ILRUN), mRNA.	7	1	8	0	0	0	0	0	0	7	1	8	0	0	0	0	0	0	0	0	0	0	8	#N/A	#N/A	#N/A
2180	NM_001076925	540689	SPAG9	sperm associated antigen 9 (SPAG9), mRNA.	0	0	0	0	1	1	2	5	7	2	6	8	0	0	0	0	0	0	0	0	0	0	8	#N/A	#N/A	#N/A
2252	NM_001077052	767991	RNF24	ring finger protein 24 (RNF24), mRNA.	2	2	4	0	1	1	2	1	3	4	4	8	0	0	0	0	0	0	0	0	0	0	8	1.66594	#N/A	#N/A
2254	NM_001077058	767998	LRRC18	leucine rich repeat containing 18 (LRRC18), mRNA.	0	4	4	0	0	0	0	0	0	0	4	4	1	1	2	0	0	0	0	0	0	4	8	#N/A	#N/A	#N/A
2267	NM_001077089	768030	MGC137098	uncharacterized protein MGC137098 (MGC137098), mRNA.	0	6	6	0	0	0	0	0	0	0	6	6	0	1	1	0	0	0	0	0	0	2	8	#N/A	#N/A	#N/A
2272	NM_001077100	768041	MGC137454	uncharacterized protein MGC137454 (MGC137454), mRNA.	5	3	8	0	0	0	0	0	0	5	3	8	0	0	0	0	0	0	0	0	0	0	8	#N/A	#N/A	#N/A
2294	NM_001077828	281239	IGF1	insulin like growth factor 1 (IGF1), mRNA.	2	4	6	0	0	0	0	2	2	2	6	8	0	0	0	0	0	0	0	0	0	0	8	#N/A	#N/A	#N/A
2321	NM_001077872	507761	GARNL3	GTPase activating Rap/RanGAP domain like 3 (GARNL3), mRNA.	0	4	4	0	0	0	0	0	0	0	4	4	0	2	2	0	0	0	0	0	0	4	8	#N/A	#N/A	#N/A
2368	NM_001077972	527263	FYN	FYN proto-oncogene, Src family tyrosine kinase (FYN), mRNA.	3	5	8	0	0	0	0	0	0	3	5	8	0	0	0	0	0	0	0	0	0	0	8	#N/A	#N/A	#N/A
2369	NM_001077973	527349	RGS3	regulator of G protein signaling 3 (RGS3), mRNA.	5	3	8	0	0	0	0	0	0	5	3	8	0	0	0	0	0	0	0	0	0	0	8	#N/A	#N/A	#N/A
2377	NM_001077983	529698	INVS	inversin (INVS), mRNA.	1	0	1	0	0	0	3	4	7	4	4	8	0	0	0	0	0	0	0	0	0	0	8	#N/A	#N/A	#N/A
2394	NM_001078005	535130	SCFD2	sec1 family domain containing 2 (SCFD2), mRNA.	1	7	8	0	0	0	0	0	0	1	7	8	0	0	0	0	0	0	0	0	0	0	8	#N/A	#N/A	#N/A
2417	NM_001078059	616081	C2CD6	C2 calcium dependent domain containing 6 (C2CD6), mRNA.	1	0	1	0	1	1	1	5	6	2	6	8	0	0	0	0	0	0	0	0	0	0	8	#N/A	#N/A	#N/A
2428	NM_001078078	617469	PMEPA1	prostate transmembrane protein, androgen induced 1 (PMEPA1), mRNA.	1	4	5	0	0	0	2	1	3	3	5	8	0	0	0	0	0	0	0	0	0	0	8	#N/A	#N/A	#N/A
2581	NM_001080325	616660	TSPAN11	tetraspanin 11 (TSPAN11), mRNA.	5	2	7	0	1	1	0	0	0	5	3	8	0	0	0	0	0	0	0	0	0	0	8	-2.42908	#N/A	TSPAN11
2596	NM_001080360	784587	KCTD1	potassium channel tetramerization domain containing 1 (KCTD1), mRNA.	4	3	7	0	0	0	0	1	1	4	4	8	0	0	0	0	0	0	0	0	0	0	8	#N/A	#N/A	#N/A
2611	NM_001080903	508652	RFC2	replication factor C subunit 2 (RFC2), mRNA.	8	0	8	0	0	0	0	0	0	8	0	8	0	0	0	0	0	0	0	0	0	0	8	#N/A	#N/A	#N/A
2629	NM_001081527	527436	MSI1	musashi RNA binding protein 1 (MSI1), mRNA.	6	1	7	0	0	0	0	1	1	6	2	8	0	0	0	0	0	0	0	0	0	0	8	#N/A	#N/A	#N/A
2635	NM_001081542	541125	ELK3	ETS transcription factor ELK3 (ELK3), mRNA.	5	0	5	0	0	0	0	3	3	5	3	8	0	0	0	0	0	0	0	0	0	0	8	#N/A	#N/A	#N/A
2645	NM_001081587	513326	RNF20	ring finger protein 20 (RNF20), mRNA.	2	5	7	0	0	0	1	0	1	3	5	8	0	0	0	0	0	0	0	0	0	0	8	#N/A	#N/A	#N/A
2658	NM_001081604	533994	SEC23A	SEC23 homolog A, COPII coat complex component (SEC23A), mRNA.	6	0	6	0	0	0	0	2	2	6	2	8	0	0	0	0	0	0	0	0	0	0	8	#N/A	#N/A	#N/A
2686	NM_001081730	536153	GPC6	glypican 6 (GPC6), mRNA.	4	4	8	0	0	0	0	0	0	4	4	8	0	0	0	0	0	0	0	0	0	0	8	#N/A	#N/A	#N/A
2709	NM_001082451	539121	KMT2E	lysine methyltransferase 2E (inactive) (KMT2E), mRNA.	4	3	7	0	0	0	0	1	1	4	4	8	0	0	0	0	0	0	0	0	0	0	8	#N/A	#N/A	#N/A
2711	NM_001082453	540513	RHOBTB1	Rho related BTB domain containing 1 (RHOBTB1), mRNA.	4	3	7	0	0	0	0	1	1	4	4	8	0	0	0	0	0	0	0	0	0	0	8	#N/A	#N/A	#N/A
2743	NM_001083386	507575	CEBPZ	CCAAT enhancer binding protein zeta (CEBPZ), mRNA.	0	5	5	0	0	0	1	0	1	1	5	6	0	0	0	0	0	0	1	0	1	2	8	#N/A	#N/A	#N/A
2792	NM_001083474	534063	EIF2B3	eukaryotic translation initiation factor 2B subunit gamma (EIF2B3), mRNA.	0	3	3	0	0	0	3	0	3	3	3	6	0	0	0	0	0	0	1	0	1	2	8	#N/A	#N/A	#N/A
2870	NM_001083739	539016	TFEC	transcription factor EC (TFEC), mRNA.	3	5	8	0	0	0	0	0	0	3	5	8	0	0	0	0	0	0	0	0	0	0	8	-1.4772	#N/A	#N/A
2897	NM_001083784	618298	TMEM182	transmembrane protein 182 (TMEM182), mRNA.	7	0	7	0	0	0	0	1	1	7	1	8	0	0	0	0	0	0	0	0	0	0	8	#N/A	#N/A	#N/A
2993	NM_001098116	540554	THEMIS	thymocyte selection associated (THEMIS), mRNA.	1	2	3	0	2	2	0	3	3	1	7	8	0	0	0	0	0	0	0	0	0	0	8	#N/A	#N/A	#N/A
3009	NM_001098139	617624	SLC44A2	solute carrier family 44 member 2 (SLC44A2), mRNA.	4	0	4	0	1	1	0	1	1	4	2	6	1	0	1	0	0	0	0	0	0	2	8	#N/A	#N/A	#N/A
3015	NM_001098149	781376	TUBGCP2	tubulin gamma complex associated protein 2 (TUBGCP2), mRNA.	1	1	2	0	0	0	0	6	6	1	7	8	0	0	0	0	0	0	0	0	0	0	8	#N/A	#N/A	#N/A
3096	NM_001098985	515469	FRMD8	FERM domain containing 8 (FRMD8), mRNA.	2	3	5	0	0	0	1	0	1	3	3	6	1	0	1	0	0	0	0	0	0	2	8	#N/A	#N/A	#N/A
3149	NM_001099067	534815	PIK3C3	phosphatidylinositol 3-kinase catalytic subunit type 3 (PIK3C3), mRNA.	3	2	5	2	0	2	1	0	1	6	2	8	0	0	0	0	0	0	0	0	0	0	8	#N/A	#N/A	#N/A
3161	NM_001099087	538558	BRI3BP	BRI3 binding protein (BRI3BP), mRNA.	7	0	7	0	1	1	0	0	0	7	1	8	0	0	0	0	0	0	0	0	0	0	8	#N/A	#N/A	BRI3BP
3206	NM_001099189	783240	LRRC72	leucine rich repeat containing 72 (LRRC72), mRNA.	3	0	3	0	0	0	3	2	5	6	2	8	0	0	0	0	0	0	0	0	0	0	8	#N/A	#N/A	#N/A
3224	NM_001099374	516008	CD200R1L	CD200 receptor 1-like (CD200R1L), mRNA.	2	1	3	0	0	0	2	1	3	4	2	6	0	0	0	0	0	0	1	0	1	2	8	-2.12853	#N/A	#N/A
3229	NM_001099380	529593	GABRB3	gamma-aminobutyric acid type A receptor subunit beta3 (GABRB3), mRNA.	4	4	8	0	0	0	0	0	0	4	4	8	0	0	0	0	0	0	0	0	0	0	8	#N/A	#N/A	#N/A
3305	NM_001100378	518062	SLC17A9	solute carrier family 17 member 9 (SLC17A9), mRNA.	1	3	4	0	0	0	0	0	0	1	3	4	0	2	2	0	0	0	0	0	0	4	8	-1.61981	#N/A	#N/A
3331	NM_001101092	514787	STK38L	serine/threonine kinase 38 like (STK38L), mRNA.	2	3	5	0	0	0	0	3	3	2	6	8	0	0	0	0	0	0	0	0	0	0	8	1.66536	#N/A	#N/A
3349	NM_001101127	526331	GALNT16	polypeptide N-acetylgalactosaminyltransferase 16 (GALNT16), mRNA.	2	6	8	0	0	0	0	0	0	2	6	8	0	0	0	0	0	0	0	0	0	0	8	#N/A	#N/A	#N/A
3357	NM_001101139	531706	USP33	ubiquitin specific peptidase 33 (USP33), mRNA.	1	7	8	0	0	0	0	0	0	1	7	8	0	0	0	0	0	0	0	0	0	0	8	#N/A	#N/A	#N/A
3358	NM_001101141	532719	GDPD5	glycerophosphodiester phosphodiesterase domain containing 5 (GDPD5), mRNA.	0	7	7	0	0	0	1	0	1	1	7	8	0	0	0	0	0	0	0	0	0	0	8	#N/A	#N/A	#N/A
3522	NM_001101984	513967	ALDH3A2	aldehyde dehydrogenase 3 family member A2 (ALDH3A2), mRNA.	1	5	6	0	0	0	2	0	2	3	5	8	0	0	0	0	0	0	0	0	0	0	8	#N/A	#N/A	#N/A
3540	NM_001102014	514943	RHBDL2	rhomboid like 2 (RHBDL2), mRNA.	2	5	7	0	0	0	0	1	1	2	6	8	0	0	0	0	0	0	0	0	0	0	8	#N/A	#N/A	#N/A
3658	NM_001102195	537173	ERC2	ELKS/RAB6-interacting/CAST family member 2 (ERC2), mRNA.	5	3	8	0	0	0	0	0	0	5	3	8	0	0	0	0	0	0	0	0	0	0	8	#N/A	#N/A	#N/A
3707	NM_001102279	614455	RETSAT	retinol saturase (RETSAT), mRNA.	2	0	2	0	0	0	0	4	4	2	4	6	0	0	0	0	0	0	0	1	1	2	8	2.23803	#N/A	#N/A
3715	NM_001102293	615850	PTPN5	protein tyrosine phosphatase non-receptor type 5 (PTPN5), mRNA.	1	6	7	0	0	0	0	1	1	1	7	8	0	0	0	0	0	0	0	0	0	0	8	#N/A	#N/A	#N/A
3719	NM_001102300	616368	IGFBP7	insulin like growth factor binding protein 7 (IGFBP7), mRNA.	1	2	3	0	0	0	3	2	5	4	4	8	0	0	0	0	0	0	0	0	0	0	8	#N/A	#N/A	#N/A
3724	NM_001102307	616969	ARHGEF28	Rho guanine nucleotide exchange factor 28 (ARHGEF28), mRNA.	1	6	7	0	0	0	0	1	1	1	7	8	0	0	0	0	0	0	0	0	0	0	8	#N/A	#N/A	#N/A
3779	NM_001102506	523226	PCDHA13	protocadherin alpha 13 (PCDHA13), mRNA.	4	2	6	0	1	1	1	0	1	5	3	8	0	0	0	0	0	0	0	0	0	0	8	-4.65703	#N/A	#N/A
3795	NM_001102532	784749	ANKRD27	ankyrin repeat domain 27 (ANKRD27), mRNA.	1	3	4	1	0	1	1	2	3	3	5	8	0	0	0	0	0	0	0	0	0	0	8	#N/A	#N/A	#N/A
3846	NM_001103263	527428	RABGAP1L	RAB GTPase activating protein 1-like (RABGAP1L), mRNA.	1	3	4	0	1	1	1	2	3	2	6	8	0	0	0	0	0	0	0	0	0	0	8	#N/A	#N/A	RABGAP1L
3853	NM_001103277	533945	CNOT2	CCR4-NOT transcription complex subunit 2 (CNOT2), mRNA.	4	2	6	0	1	1	0	1	1	4	4	8	0	0	0	0	0	0	0	0	0	0	8	#N/A	#N/A	#N/A
3898	NM_001104966	505523	WFDC3	WAP four-disulfide core domain 3 (WFDC3), mRNA.	2	6	8	0	0	0	0	0	0	2	6	8	0	0	0	0	0	0	0	0	0	0	8	#N/A	#N/A	#N/A
4039	NM_001105630	540111	NUP160	nucleoporin 160 (NUP160), mRNA.	3	4	7	0	0	0	0	1	1	3	5	8	0	0	0	0	0	0	0	0	0	0	8	#N/A	#N/A	#N/A
4149	NM_001113767	533620	ANKRD26	ankyrin repeat domain 26 (ANKRD26), mRNA.	1	3	4	1	0	1	1	0	1	3	3	6	0	0	0	0	0	0	1	0	1	2	8	#N/A	#N/A	#N/A
4156	NM_001114190	506406	GSR	glutathione-disulfide reductase (GSR), mRNA; nuclear gene for mitochondrial product.	0	7	7	0	0	0	1	0	1	1	7	8	0	0	0	0	0	0	0	0	0	0	8	#N/A	#N/A	#N/A
4252	NM_001159566	535376	TGFBR2	transforming growth factor beta receptor 2 (TGFBR2), mRNA.	7	1	8	0	0	0	0	0	0	7	1	8	0	0	0	0	0	0	0	0	0	0	8	#N/A	#N/A	#N/A
4273	NM_001163934	506708	RADIL	Ras association and DIL domains (RADIL), mRNA.	1	6	7	0	0	0	1	0	1	2	6	8	0	0	0	0	0	0	0	0	0	0	8	#N/A	#N/A	#N/A
4324	NM_001166574	407103	TRPC5	transient receptor potential cation channel subfamily C member 5 (TRPC5), mRNA.	1	2	3	0	0	0	0	5	5	1	7	8	0	0	0	0	0	0	0	0	0	0	8	#N/A	#N/A	#N/A
4382	NM_001191159	782360	VWC2L	von Willebrand factor C domain containing 2 like (VWC2L), mRNA.	0	1	1	0	0	0	7	0	7	7	1	8	0	0	0	0	0	0	0	0	0	0	8	#N/A	#N/A	#N/A
4415	NM_001191218	785664	STON2	stonin 2 (STON2), mRNA.	0	1	1	0	0	0	3	4	7	3	5	8	0	0	0	0	0	0	0	0	0	0	8	2.40293	#N/A	#N/A
4429	NM_001191266	100141289	USP13	ubiquitin specific peptidase 13 (USP13), mRNA.	1	6	7	0	0	0	1	0	1	2	6	8	0	0	0	0	0	0	0	0	0	0	8	#N/A	#N/A	#N/A
4472	NM_001191349	537614	NR3C2	nuclear receptor subfamily 3 group C member 2 (NR3C2), mRNA.	1	7	8	0	0	0	0	0	0	1	7	8	0	0	0	0	0	0	0	0	0	0	8	3.40693	#N/A	#N/A
4497	NM_001191389	509587	ATG16L1	autophagy related 16 like 1 (ATG16L1), mRNA.	0	8	8	0	0	0	0	0	0	0	8	8	0	0	0	0	0	0	0	0	0	0	8	#N/A	#N/A	#N/A
4507	NM_001191418	534321	SOX6	SRY-box transcription factor 6 (SOX6), mRNA.	1	5	6	0	0	0	0	0	0	1	5	6	1	0	1	0	0	0	0	0	0	2	8	#N/A	#N/A	#N/A
4541	NM_001191481	613826	GPR137B	G protein-coupled receptor 137B (GPR137B), mRNA.	3	1	4	0	1	1	1	2	3	4	4	8	0	0	0	0	0	0	0	0	0	0	8	-1.46461	#N/A	#N/A
4543	NM_001191484	614824	HKDC1	hexokinase domain containing 1 (HKDC1), mRNA.	1	3	4	1	0	1	1	0	1	3	3	6	0	1	1	0	0	0	0	0	0	2	8	#N/A	#N/A	#N/A
4558	NM_001191516	534164	SLIT2	slit guidance ligand 2 (SLIT2), mRNA.	3	3	6	0	1	1	0	1	1	3	5	8	0	0	0	0	0	0	0	0	0	0	8	#N/A	#N/A	#N/A
4698	NM_001192267	510714	FRMD4A	FERM domain containing 4A (FRMD4A), mRNA.	1	5	6	0	0	0	1	1	2	2	6	8	0	0	0	0	0	0	0	0	0	0	8	-3.49672	#N/A	#N/A
4731	NM_001192329	539910	TFAP2D	transcription factor AP-2 delta (TFAP2D), mRNA.	6	2	8	0	0	0	0	0	0	6	2	8	0	0	0	0	0	0	0	0	0	0	8	#N/A	#N/A	#N/A
4793	NM_001192455	516891	FA2H	fatty acid 2-hydroxylase (FA2H), mRNA.	7	1	8	0	0	0	0	0	0	7	1	8	0	0	0	0	0	0	0	0	0	0	8	#N/A	#N/A	#N/A
4836	NM_001192524	503578	HNF1A	HNF1 homeobox A (HNF1A), mRNA.	1	5	6	0	0	0	1	1	2	2	6	8	0	0	0	0	0	0	0	0	0	0	8	#N/A	#N/A	#N/A
4864	NM_001192568	522810	TEX14	testis expressed 14, intercellular bridge forming factor (TEX14), mRNA.	1	4	5	0	0	0	3	0	3	4	4	8	0	0	0	0	0	0	0	0	0	0	8	#N/A	#N/A	#N/A
4867	NM_001192574	523151	TCF20	transcription factor 20 (TCF20), mRNA.	8	0	8	0	0	0	0	0	0	8	0	8	0	0	0	0	0	0	0	0	0	0	8	#N/A	#N/A	TCF20
4881	NM_001192596	524460	B4GALT6	beta-1,4-galactosyltransferase 6 (B4GALT6), mRNA.	0	5	5	0	0	0	3	0	3	3	5	8	0	0	0	0	0	0	0	0	0	0	8	-2.8835	#N/A	#N/A
4932	NM_001192676	529537	C2CD2	C2 calcium dependent domain containing 2 (C2CD2), mRNA.	0	8	8	0	0	0	0	0	0	0	8	8	0	0	0	0	0	0	0	0	0	0	8	#N/A	#N/A	#N/A
4937	NM_001192684	529894	ZNF451	zinc finger protein 451 (ZNF451), mRNA.	4	3	7	0	0	0	0	1	1	4	4	8	0	0	0	0	0	0	0	0	0	0	8	#N/A	#N/A	#N/A
5003	NM_001192789	540839	POLR3B	RNA polymerase III subunit B (POLR3B), mRNA.	4	2	6	0	0	0	1	1	2	5	3	8	0	0	0	0	0	0	0	0	0	0	8	#N/A	#N/A	#N/A
5046	NM_001192846	497621	SLCO4C1	solute carrier organic anion transporter family member 4C1 (SLCO4C1), mRNA.	3	1	4	0	0	0	0	4	4	3	5	8	0	0	0	0	0	0	0	0	0	0	8	#N/A	#N/A	#N/A
5101	NM_001192919	537747	KLF7	Kruppel like factor 7 (KLF7), mRNA.	1	0	1	0	0	0	4	3	7	5	3	8	0	0	0	0	0	0	0	0	0	0	8	#N/A	#N/A	#N/A
5158	NM_001192996	504724	PIGT	phosphatidylinositol glycan anchor biosynthesis class T (PIGT), mRNA.	4	3	7	0	0	0	0	1	1	4	4	8	0	0	0	0	0	0	0	0	0	0	8	#N/A	#N/A	#N/A
5160	NM_001192999	613923	DYM	dymeclin (DYM), mRNA.	2	6	8	0	0	0	0	0	0	2	6	8	0	0	0	0	0	0	0	0	0	0	8	#N/A	#N/A	#N/A
5162	NM_001193003	522719	CLCN3	chloride voltage-gated channel 3 (CLCN3), mRNA.	5	1	6	0	1	1	0	1	1	5	3	8	0	0	0	0	0	0	0	0	0	0	8	#N/A	#N/A	#N/A
5165	NM_001193009	508142	TOMM34	translocase of outer mitochondrial membrane 34 (TOMM34), mRNA; nuclear gene for mitochondrial product.	6	1	7	0	0	0	0	1	1	6	2	8	0	0	0	0	0	0	0	0	0	0	8	#N/A	#N/A	#N/A
5180	NM_001193034	614497	AKAP2	A-kinase anchoring protein 2 (AKAP2), mRNA.	2	4	6	0	0	0	0	0	0	2	4	6	0	1	1	0	0	0	0	0	0	2	8	#N/A	#N/A	#N/A
5207	NM_001193087	511052	INTS3	integrator complex subunit 3 (INTS3), mRNA.	0	5	5	0	0	0	1	0	1	1	5	6	0	1	1	0	0	0	0	0	0	2	8	#N/A	#N/A	#N/A
5287	NM_001193217	614147	TM9SF3	transmembrane 9 superfamily member 3 (TM9SF3), mRNA.	4	0	4	0	0	0	0	0	0	4	0	4	2	0	2	0	0	0	0	0	0	4	8	#N/A	#N/A	#N/A
5290	NM_001193220	507119	PFKP	phosphofructokinase, platelet (PFKP), mRNA.	4	4	8	0	0	0	0	0	0	4	4	8	0	0	0	0	0	0	0	0	0	0	8	-1.70932	#N/A	#N/A
5324	NM_001195067	777592	FAM229B	family with sequence similarity 229 member B (FAM229B), mRNA.	0	2	2	0	0	0	0	0	0	0	2	2	0	2	2	0	0	0	1	0	1	6	8	#N/A	#N/A	FAM229B
5376	NM_001205422	524446	PDE11A	phosphodiesterase 11A (PDE11A), mRNA.	2	3	5	0	0	0	0	3	3	2	6	8	0	0	0	0	0	0	0	0	0	0	8	#N/A	#N/A	#N/A
5411	NM_001205480	100138748	THOC1	THO complex 1 (THOC1), mRNA.	1	5	6	0	0	0	2	0	2	3	5	8	0	0	0	0	0	0	0	0	0	0	8	#N/A	#N/A	#N/A
5438	NM_001205517	533303	ALKBH5	alkB homolog 5, RNA demethylase (ALKBH5), mRNA.	0	0	0	0	0	0	1	7	8	1	7	8	0	0	0	0	0	0	0	0	0	0	8	#N/A	#N/A	#N/A
5491	NM_001205629	508175	PLXNB2	plexin B2 (PLXNB2), mRNA.	2	0	2	0	0	0	0	0	0	2	0	2	2	0	2	0	1	1	0	0	0	6	8	#N/A	#N/A	#N/A
5503	NM_001205645	508819	PIP5K1C	phosphatidylinositol-4-phosphate 5-kinase type 1 gamma (PIP5K1C), mRNA.	7	1	8	0	0	0	0	0	0	7	1	8	0	0	0	0	0	0	0	0	0	0	8	#N/A	#N/A	#N/A
5512	NM_001205659	509609	CD101	CD101 molecule (CD101), mRNA.	2	1	3	0	0	0	1	4	5	3	5	8	0	0	0	0	0	0	0	0	0	0	8	#N/A	#N/A	#N/A
5649	NM_001205910	524417	SLC41A2	solute carrier family 41 member 2 (SLC41A2), mRNA.	2	6	8	0	0	0	0	0	0	2	6	8	0	0	0	0	0	0	0	0	0	0	8	#N/A	#N/A	#N/A
5689	NM_001205974	530164	SLC17A5	solute carrier family 17 member 5 (SLC17A5), mRNA.	3	2	5	0	0	0	2	1	3	5	3	8	0	0	0	0	0	0	0	0	0	0	8	#N/A	#N/A	#N/A
5716	NM_001206015	540595	BMP7	bone morphogenetic protein 7 (BMP7), mRNA.	1	2	3	0	0	0	1	4	5	2	6	8	0	0	0	0	0	0	0	0	0	0	8	#N/A	#N/A	#N/A
5770	NM_001206095	536269	MTHFD2L	methylenetetrahydrofolate dehydrogenase (NADP+ dependent) 2 like (MTHFD2L), mRNA.	0	0	0	0	1	1	3	4	7	3	5	8	0	0	0	0	0	0	0	0	0	0	8	#N/A	#N/A	#N/A
5796	NM_001206134	512470	DHX29	DExH-box helicase 29 (DHX29), mRNA.	7	1	8	0	0	0	0	0	0	7	1	8	0	0	0	0	0	0	0	0	0	0	8	#N/A	#N/A	#N/A
5832	NM_001206183	518830	RO60	Ro60, Y RNA binding protein (RO60), mRNA.	8	0	8	0	0	0	0	0	0	8	0	8	0	0	0	0	0	0	0	0	0	0	8	#N/A	#N/A	#N/A
5861	NM_001206229	528545	ANKS3	ankyrin repeat and sterile alpha motif domain containing 3 (ANKS3), mRNA.	0	8	8	0	0	0	0	0	0	0	8	8	0	0	0	0	0	0	0	0	0	0	8	#N/A	#N/A	#N/A
5896	NM_001206308	509784	PHLDB2	pleckstrin homology like domain family B member 2 (PHLDB2), mRNA.	0	1	1	0	0	0	2	1	3	2	2	4	0	2	2	0	0	0	0	0	0	4	8	-3.06728	#N/A	#N/A
5935	NM_001206436	511200	GMPS	guanine monophosphate synthase (GMPS), mRNA.	1	0	1	0	0	0	3	4	7	4	4	8	0	0	0	0	0	0	0	0	0	0	8	#N/A	#N/A	#N/A
5949	NM_001206487	534799	TOP1	DNA topoisomerase I (TOP1), mRNA.	7	1	8	0	0	0	0	0	0	7	1	8	0	0	0	0	0	0	0	0	0	0	8	#N/A	#N/A	#N/A
5963	NM_001206512	513301	PIK3C2G	phosphatidylinositol-4-phosphate 3-kinase catalytic subunit type 2 gamma (PIK3C2G), mRNA.	0	1	1	0	0	0	2	5	7	2	6	8	0	0	0	0	0	0	0	0	0	0	8	#N/A	#N/A	#N/A
6004	NM_001206597	517290	LIPM	lipase family member M (LIPM), mRNA.	4	3	7	0	0	0	0	1	1	4	4	8	0	0	0	0	0	0	0	0	0	0	8	#N/A	#N/A	#N/A
6114	NM_001206876	538091	SENP1	SUMO specific peptidase 1 (SENP1), mRNA.	6	2	8	0	0	0	0	0	0	6	2	8	0	0	0	0	0	0	0	0	0	0	8	#N/A	#N/A	#N/A
6240	NM_001282586	540026	ARHGEF17	Rho guanine nucleotide exchange factor 17 (ARHGEF17), mRNA.	1	6	7	0	0	0	1	0	1	2	6	8	0	0	0	0	0	0	0	0	0	0	8	#N/A	#N/A	#N/A
6298	NM_001319882	534129	CREB5	cAMP responsive element binding protein 5 (CREB5), mRNA.	4	3	7	0	0	0	0	1	1	4	4	8	0	0	0	0	0	0	0	0	0	0	8	#N/A	#N/A	#N/A
6306	NM_001328657	533266	FFAR4	free fatty acid receptor 4 (FFAR4), mRNA.	1	2	3	1	0	1	2	0	2	4	2	6	0	1	1	0	0	0	0	0	0	2	8	#N/A	#N/A	#N/A
6327	NM_001359989	540859	ELOC	elongin C (ELOC), transcript variant 1, mRNA.	0	2	2	0	0	0	0	0	0	0	2	2	0	3	3	0	0	0	0	0	0	6	8	#N/A	#N/A	#N/A
6425	NM_174056	281161	FGF2	fibroblast growth factor 2 (FGF2), mRNA.	0	6	6	0	0	0	0	0	0	0	6	6	1	0	1	0	0	0	0	0	0	2	8	#N/A	#N/A	#N/A
6520	NM_174238	281614	ALCAM	activated leukocyte cell adhesion molecule (ALCAM), mRNA.	4	4	8	0	0	0	0	0	0	4	4	8	0	0	0	0	0	0	0	0	0	0	8	#N/A	#N/A	#N/A
6567	NM_174325	281792	GNAO1	G protein subunit alpha o1 (GNAO1), mRNA.	6	0	6	0	0	0	0	2	2	6	2	8	0	0	0	0	0	0	0	0	0	0	8	#N/A	#N/A	#N/A
6624	NM_174423	281983	PLAUR	plasminogen activator, urokinase receptor (PLAUR), mRNA.	1	3	4	0	0	0	0	0	0	1	3	4	2	0	2	0	0	0	0	0	0	4	8	1.8612	#N/A	#N/A
6672	NM_174513	282176	ADAP1	ArfGAP with dual PH domains 1 (ADAP1), mRNA.	0	6	6	0	0	0	1	1	2	1	7	8	0	0	0	0	0	0	0	0	0	0	8	#N/A	#N/A	#N/A
6747	NM_174662	282488	FAS	Fas cell surface death receptor (FAS), mRNA.	0	4	4	1	1	2	2	0	2	3	5	8	0	0	0	0	0	0	0	0	0	0	8	2.7186	#N/A	#N/A
6773	NM_174714	282687	CELA2A	chymotrypsin-like elastase family, member 2A (CELA2A), mRNA.	0	6	6	0	0	0	0	0	0	0	6	6	0	1	1	0	0	0	0	0	0	2	8	#N/A	#N/A	#N/A
6776	NM_174725	282711	EPAS1	endothelial PAS domain protein 1 (EPAS1), mRNA.	4	4	8	0	0	0	0	0	0	4	4	8	0	0	0	0	0	0	0	0	0	0	8	1.84257	#N/A	#N/A
6795	NM_174766	286798	TNS1	tensin 1 (TNS1), mRNA.	2	5	7	0	0	0	0	1	1	2	6	8	0	0	0	0	0	0	0	0	0	0	8	#N/A	#N/A	#N/A
6809	NM_174796	286865	PIK3R3	phosphoinositide-3-kinase regulatory subunit 3 (PIK3R3), mRNA.	1	1	2	0	0	0	4	2	6	5	3	8	0	0	0	0	0	0	0	0	0	0	8	#N/A	#N/A	#N/A
6828	NM_174835	317656	PCTP	phosphatidylcholine transfer protein (PCTP), mRNA.	1	1	2	0	0	0	0	6	6	1	7	8	0	0	0	0	0	0	0	0	0	0	8	#N/A	#N/A	#N/A
6874	NM_176651	338056	CD163L1	CD163 molecule-like 1 (CD163L1), mRNA.	0	7	7	0	0	0	1	0	1	1	7	8	0	0	0	0	0	0	0	0	0	0	8	#N/A	#N/A	#N/A
6897	NM_177507	281528	TGM2	transglutaminase 2 (TGM2), mRNA.	6	1	7	0	0	0	0	1	1	6	2	8	0	0	0	0	0	0	0	0	0	0	8	#N/A	#N/A	TGM2
6944	NM_181037	287024	NOS3	nitric oxide synthase 3 (endothelial cell) (NOS3), mRNA.	0	5	5	0	0	0	1	0	1	1	5	6	0	1	1	0	0	0	0	0	0	2	8	#N/A	#N/A	#N/A
6954	NM_183083	360191	NOB1	NIN1 (RPN12) binding protein 1 homolog (NOB1), mRNA.	2	4	6	1	0	1	1	0	1	4	4	8	0	0	0	0	0	0	0	0	0	0	8	#N/A	#N/A	#N/A
6958	NM_201527	281496	SOD2	superoxide dismutase 2 (SOD2), mRNA; nuclear gene for mitochondrial product.	5	0	5	0	0	0	0	3	3	5	3	8	0	0	0	0	0	0	0	0	0	0	8	2.78051	#N/A	SOD2
6970	NM_205790	404123	FAHD2A	fumarylacetoacetate hydrolase domain containing 2A (FAHD2A), mRNA.	1	5	6	0	0	0	0	0	0	1	5	6	0	0	0	0	0	0	0	1	1	2	8	#N/A	#N/A	#N/A
6986	NM_206971	404548	SEC16B	SEC16 homolog B, endoplasmic reticulum export factor (SEC16B), mRNA.	4	2	6	0	1	1	1	0	1	5	3	8	0	0	0	0	0	0	0	0	0	0	8	3.13094	#N/A	#N/A
832	NM_001037628	617434	SELPLG	selectin P ligand	0	0	0	0	0	0	0	0	0	0	0	0	4	0	4	0	0	0	0	0	0	8	8	#N/A	#N/A	#N/A
5349	NM_001205324	514894	DOK3	docking protein 3	0	0	0	0	0	0	0	0	0	0	0	0	4	0	4	0	0	0	0	0	0	8	8	#N/A	#N/A	#N/A
5834	NM_001206186	539754	UBE2J1	ubiquitin conjugating enzyme E2 J1	0	0	0	0	0	0	0	0	0	0	0	0	0	0	0	1	0	1	0	3	3	8	8	#N/A	#N/A	#N/A
5979	NM_001206548	534630	LOC534630	RNA binding motif protein, X-linked 2-like	0	0	0	0	0	0	0	0	0	0	0	0	0	0	0	0	0	0	0	4	4	8	8	#N/A	#N/A	#N/A
6996	NR_030851	100313330	MIR2336	microRNA mir-2336	0	0	0	0	0	0	0	0	0	0	0	0	4	0	4	0	0	0	0	0	0	8	8	#N/A	#N/A	#N/A
61	NM_001008668	493992	ST6GAL2	ST6 beta-galactoside alpha-2,6-sialyltransferase 2 (ST6GAL2), mRNA.	0	6	6	0	0	0	1	0	1	1	6	7	0	0	0	0	0	0	0	0	0	0	7	#N/A	#N/A	#N/A
77	NM_001012668	280817	HK1	hexokinase 1 (HK1), mRNA.	4	3	7	0	0	0	0	0	0	4	3	7	0	0	0	0	0	0	0	0	0	0	7	-1.78858	#N/A	#N/A
78	NM_001012670	281832	HSP90AA1	heat shock protein 90 alpha family class A member 1 (HSP90AA1), mRNA.	2	1	3	0	0	0	0	0	0	2	1	3	0	2	2	0	0	0	0	0	0	4	7	#N/A	#N/A	HSP90AA1
189	NM_001015602	514886	STK4	serine/threonine kinase 4 (STK4), mRNA.	4	3	7	0	0	0	0	0	0	4	3	7	0	0	0	0	0	0	0	0	0	0	7	#N/A	#N/A	#N/A
224	NM_001015675	540466	RIOX2	ribosomal oxygenase 2 (RIOX2), mRNA.	6	1	7	0	0	0	0	0	0	6	1	7	0	0	0	0	0	0	0	0	0	0	7	#N/A	#N/A	#N/A
265	NM_001024532	513525	PSMD13	proteasome 26S subunit, non-ATPase 13 (PSMD13), mRNA.	0	5	5	0	0	0	2	0	2	2	5	7	0	0	0	0	0	0	0	0	0	0	7	#N/A	#N/A	#N/A
309	NM_001031759	521015	HEPACAM	hepatic and glial cell adhesion molecule (HEPACAM), mRNA.	3	3	6	0	0	0	1	0	1	4	3	7	0	0	0	0	0	0	0	0	0	0	7	#N/A	#N/A	#N/A
330	NM_001033990	508918	SCP2	sterol carrier protein 2 (SCP2), mRNA.	3	3	6	0	0	0	1	0	1	4	3	7	0	0	0	0	0	0	0	0	0	0	7	1.36845	#N/A	#N/A
337	NM_001034041	282857	SNCA	synuclein alpha (SNCA), mRNA.	6	1	7	0	0	0	0	0	0	6	1	7	0	0	0	0	0	0	0	0	0	0	7	#N/A	#N/A	#N/A
338	NM_001034042	286803	UBE2V2	ubiquitin conjugating enzyme E2 V2 (UBE2V2), mRNA.	1	3	4	0	2	2	0	1	1	1	6	7	0	0	0	0	0	0	0	0	0	0	7	#N/A	#N/A	#N/A
364	NM_001034244	505401	TADA2A	transcriptional adaptor 2A (TADA2A), mRNA.	2	2	4	0	0	0	2	1	3	4	3	7	0	0	0	0	0	0	0	0	0	0	7	#N/A	#N/A	#N/A
384	NM_001034302	507537	SPARCL1	SPARC like 1 (SPARCL1), mRNA.	4	3	7	0	0	0	0	0	0	4	3	7	0	0	0	0	0	0	0	0	0	0	7	#N/A	#N/A	#N/A
396	NM_001034337	508903	TMEM106B	transmembrane protein 106B (TMEM106B), mRNA.	4	0	4	0	0	0	0	3	3	4	3	7	0	0	0	0	0	0	0	0	0	0	7	#N/A	#N/A	#N/A
398	NM_001034344	509150	ETHE1	ETHE1 persulfide dioxygenase (ETHE1), mRNA; nuclear gene for mitochondrial product.	4	0	4	0	0	0	0	1	1	4	1	5	1	0	1	0	0	0	0	0	0	2	7	#N/A	#N/A	ETHE1
492	NM_001034564	528174	ADGRD1	adhesion G protein-coupled receptor D1 (ADGRD1), mRNA.	0	7	7	0	0	0	0	0	0	0	7	7	0	0	0	0	0	0	0	0	0	0	7	#N/A	#N/A	#N/A
527	NM_001034630	535298	GRB2	growth factor receptor bound protein 2 (GRB2), mRNA.	2	2	4	0	1	1	0	0	0	2	3	5	0	1	1	0	0	0	0	0	0	2	7	#N/A	#N/A	#N/A
544	NM_001034661	539124	TRAF6	TNF receptor associated factor 6 (TRAF6), mRNA.	3	1	4	1	0	1	0	0	0	4	1	5	0	1	1	0	0	0	0	0	0	2	7	#N/A	#N/A	TRAF6
551	NM_001034680	539672	ASNSD1	asparagine synthetase domain containing 1 (ASNSD1), mRNA.	0	7	7	0	0	0	0	0	0	0	7	7	0	0	0	0	0	0	0	0	0	0	7	#N/A	#N/A	#N/A
567	NM_001034723	541085	LONP2	lon peptidase 2, peroxisomal (LONP2), mRNA.	2	3	5	0	0	0	0	0	0	2	3	5	0	1	1	0	0	0	0	0	0	2	7	#N/A	#N/A	#N/A
591	NM_001034788	615785	SDC2	syndecan 2 (SDC2), mRNA.	0	0	0	0	0	0	0	7	7	0	7	7	0	0	0	0	0	0	0	0	0	0	7	2.58264	#N/A	#N/A
613	NM_001035027	505640	PLTP	phospholipid transfer protein (PLTP), mRNA.	6	0	6	0	0	0	0	1	1	6	1	7	0	0	0	0	0	0	0	0	0	0	7	#N/A	#N/A	#N/A
651	NM_001035093	510575	ITM2B	integral membrane protein 2B (ITM2B), mRNA.	7	0	7	0	0	0	0	0	0	7	0	7	0	0	0	0	0	0	0	0	0	0	7	#N/A	1	#N/A
670	NM_001035282	513389	DGKD	diacylglycerol kinase delta (DGKD), mRNA.	3	2	5	0	0	0	1	1	2	4	3	7	0	0	0	0	0	0	0	0	0	0	7	#N/A	#N/A	#N/A
680	NM_001035298	514705	PTCD2	pentatricopeptide repeat domain 2 (PTCD2), mRNA; nuclear gene for mitochondrial product.	5	1	6	0	0	0	0	1	1	5	2	7	0	0	0	0	0	0	0	0	0	0	7	#N/A	#N/A	#N/A
694	NM_001035326	518169	CTSA	cathepsin A (CTSA), mRNA.	1	1	2	0	0	0	0	3	3	1	4	5	1	0	1	0	0	0	0	0	0	2	7	-1.56911	#N/A	#N/A
748	NM_001035429	540183	TPST2	tyrosylprotein sulfotransferase 2 (TPST2), mRNA.	0	5	5	0	0	0	0	0	0	0	5	5	1	0	1	0	0	0	0	0	0	2	7	#N/A	#N/A	#N/A
768	NM_001035470	615886	MRGPRF	MAS related GPR family member F (MRGPRF), mRNA.	3	4	7	0	0	0	0	0	0	3	4	7	0	0	0	0	0	0	0	0	0	0	7	#N/A	#N/A	#N/A
804	NM_001037475	534232	POLR2F	polymerase (RNA) II (DNA directed) polypeptide F (POLR2F), mRNA.	1	0	1	0	0	0	0	0	0	1	0	1	2	0	2	0	0	0	0	1	1	6	7	#N/A	#N/A	#N/A
834	NM_001037816	507631	TYMS	thymidylate synthetase (TYMS), mRNA.	0	6	6	0	0	0	1	0	1	1	6	7	0	0	0	0	0	0	0	0	0	0	7	#N/A	#N/A	#N/A
854	NM_001038052	507648	PHF10	PHD finger protein 10 (PHF10), mRNA.	7	0	7	0	0	0	0	0	0	7	0	7	0	0	0	0	0	0	0	0	0	0	7	#N/A	#N/A	#N/A
1038	NM_001040603	618267	AP4S1	adaptor related protein complex 4 subunit sigma 1 (AP4S1), mRNA.	5	0	5	0	0	0	0	0	0	5	0	5	0	0	0	0	0	0	0	1	1	2	7	#N/A	#N/A	#N/A
1078	NM_001045949	506740	ESPL1	extra spindle pole bodies like 1, separase (ESPL1), mRNA.	5	0	5	0	1	1	0	1	1	5	2	7	0	0	0	0	0	0	0	0	0	0	7	#N/A	#N/A	#N/A
1092	NM_001045980	507815	STT3A	STT3 oligosaccharyltransferase complex catalytic subunit A (STT3A), mRNA.	2	3	5	0	0	0	0	2	2	2	5	7	0	0	0	0	0	0	0	0	0	0	7	-1.23567	#N/A	#N/A
1105	NM_001046004	508492	GSDMC	gasdermin C (GSDMC), mRNA.	4	0	4	0	0	0	0	1	1	4	1	5	1	0	1	0	0	0	0	0	0	2	7	#N/A	#N/A	#N/A
1124	NM_001046040	509819	PTDSS1	phosphatidylserine synthase 1 (PTDSS1), mRNA.	5	1	6	0	0	0	0	1	1	5	2	7	0	0	0	0	0	0	0	0	0	0	7	-1.50268	#N/A	#N/A
1172	NM_001046144	513331	PHF11	PHD finger protein 11 (PHF11), mRNA.	4	1	5	0	0	0	0	2	2	4	3	7	0	0	0	0	0	0	0	0	0	0	7	#N/A	#N/A	#N/A
1179	NM_001046154	513608	ARG1	arginase 1 (ARG1), mRNA.	3	1	4	0	1	1	0	2	2	3	4	7	0	0	0	0	0	0	0	0	0	0	7	#N/A	#N/A	#N/A
1209	NM_001046230	517438	DDX19B	DEAD (Asp-Glu-Ala-As) box polypeptide 19B (DDX19B), mRNA.	5	1	6	0	0	0	0	1	1	5	2	7	0	0	0	0	0	0	0	0	0	0	7	#N/A	#N/A	#N/A
1274	NM_001046356	533631	CHRDL2	chordin like 2 (CHRDL2), mRNA.	5	0	5	0	1	1	0	1	1	5	2	7	0	0	0	0	0	0	0	0	0	0	7	#N/A	#N/A	#N/A
1281	NM_001046372	534182	FKBP9	FKBP prolyl isomerase 9 (FKBP9), mRNA.	6	1	7	0	0	0	0	0	0	6	1	7	0	0	0	0	0	0	0	0	0	0	7	#N/A	#N/A	#N/A
1285	NM_001046384	534683	COMMD1	copper metabolism domain containing 1 (COMMD1), mRNA.	1	0	1	0	0	0	5	1	6	6	1	7	0	0	0	0	0	0	0	0	0	0	7	#N/A	#N/A	#N/A
1299	NM_001046416	536359	AP3S1	adaptor related protein complex 3 subunit sigma 1 (AP3S1), mRNA.	1	5	6	0	0	0	1	0	1	2	5	7	0	0	0	0	0	0	0	0	0	0	7	#N/A	#N/A	AP3S1
1301	NM_001046419	536925	COQ8A	coenzyme Q8A (COQ8A), mRNA; nuclear gene for mitochondrial product.	1	6	7	0	0	0	0	0	0	1	6	7	0	0	0	0	0	0	0	0	0	0	7	1.88597	#N/A	#N/A
1341	NM_001046517	613753	LY96	lymphocyte antigen 96 (LY96), mRNA.	1	2	3	1	0	1	1	0	1	3	2	5	0	0	0	0	0	0	0	1	1	2	7	1.5804	#N/A	#N/A
1406	NM_001075157	504360	ACOT8	acyl-CoA thioesterase 8 (ACOT8), mRNA.	0	6	6	0	0	0	1	0	1	1	6	7	0	0	0	0	0	0	0	0	0	0	7	#N/A	#N/A	#N/A
1431	NM_001075208	505575	TMC6	transmembrane channel like 6 (TMC6), mRNA.	3	3	6	1	0	1	0	0	0	4	3	7	0	0	0	0	0	0	0	0	0	0	7	#N/A	#N/A	#N/A
1443	NM_001075239	506062	PMP2	peripheral myelin protein 2 (PMP2), mRNA.	0	5	5	0	0	0	0	0	0	0	5	5	0	1	1	0	0	0	0	0	0	2	7	#N/A	#N/A	#N/A
1455	NM_001075260	506412	SAA2	serum amyloid A2 (SAA2), mRNA.	0	2	2	1	0	1	0	0	0	1	2	3	0	1	1	0	0	0	1	0	1	4	7	#N/A	#N/A	#N/A
1489	NM_001075338	507899	MICU1	mitochondrial calcium uptake 1 (MICU1), mRNA; nuclear gene for mitochondrial product.	0	5	5	0	0	0	2	0	2	2	5	7	0	0	0	0	0	0	0	0	0	0	7	#N/A	#N/A	#N/A
1506	NM_001075372	508767	CPO	carboxypeptidase O (CPO), mRNA.	0	0	0	0	1	1	0	0	0	0	1	1	0	0	0	2	0	2	1	0	1	6	7	#N/A	#N/A	#N/A
1525	NM_001075408	509500	RXRG	retinoid X receptor gamma (RXRG), mRNA.	0	6	6	0	0	0	1	0	1	1	6	7	0	0	0	0	0	0	0	0	0	0	7	#N/A	#N/A	#N/A
1545	NM_001075454	510549	RASSF4	Ras association domain family member 4 (RASSF4), mRNA.	2	4	6	0	0	0	0	1	1	2	5	7	0	0	0	0	0	0	0	0	0	0	7	1.96348	#N/A	#N/A
1558	NM_001075489	511084	ZW10	zw10 kinetochore protein (ZW10), mRNA.	5	0	5	0	0	0	0	2	2	5	2	7	0	0	0	0	0	0	0	0	0	0	7	#N/A	#N/A	#N/A
1566	NM_001075505	511255	OSBPL9	oxysterol binding protein like 9 (OSBPL9), mRNA.	3	2	5	0	0	0	0	0	0	3	2	5	1	0	1	0	0	0	0	0	0	2	7	#N/A	#N/A	#N/A
1603	NM_001075595	513054	NSD3	nuclear receptor binding SET domain protein 3 (NSD3), mRNA.	2	0	2	0	1	1	0	2	2	2	3	5	0	0	0	0	0	0	0	1	1	2	7	#N/A	#N/A	#N/A
1621	NM_001075627	513544	SAP30BP	SAP30 binding protein (SAP30BP), mRNA.	2	4	6	0	0	0	0	1	1	2	5	7	0	0	0	0	0	0	0	0	0	0	7	#N/A	#N/A	#N/A
1642	NM_001075663	514352	TBX19	T-box transcription factor 19 (TBX19), mRNA.	0	2	2	0	0	0	3	0	3	3	2	5	0	1	1	0	0	0	0	0	0	2	7	#N/A	#N/A	#N/A
1671	NM_001075749	517111	RDX	radixin (RDX), mRNA.	2	4	6	0	0	0	1	0	1	3	4	7	0	0	0	0	0	0	0	0	0	0	7	#N/A	#N/A	RDX
1721	NM_001075836	522917	RIOK3	RIO kinase 3 (RIOK3), mRNA.	2	3	5	0	0	0	1	1	2	3	4	7	0	0	0	0	0	0	0	0	0	0	7	1.01957	#N/A	#N/A
1780	NM_001075950	531420	GP2	glycoprotein 2 (GP2), mRNA.	3	0	3	0	0	0	0	0	0	3	0	3	1	0	1	0	1	1	0	0	0	4	7	#N/A	#N/A	GP2
1784	NM_001075960	532269	CMTM7	CKLF like MARVEL transmembrane domain containing 7 (CMTM7), mRNA.	7	0	7	0	0	0	0	0	0	7	0	7	0	0	0	0	0	0	0	0	0	0	7	#N/A	#N/A	#N/A
1794	NM_001075978	533003	D2HGDH	D-2-hydroxyglutarate dehydrogenase (D2HGDH), mRNA; nuclear gene for mitochondrial product.	0	6	6	1	0	1	0	0	0	1	6	7	0	0	0	0	0	0	0	0	0	0	7	#N/A	#N/A	#N/A
1803	NM_001075996	533672	WIF1	WNT inhibitory factor 1 (WIF1), mRNA.	3	0	3	0	0	0	0	2	2	3	2	5	1	0	1	0	0	0	0	0	0	2	7	#N/A	#N/A	#N/A
1807	NM_001076000	533746	DPYSL2	dihydropyrimidinase like 2 (DPYSL2), mRNA.	0	4	4	1	0	1	0	0	0	1	4	5	1	0	1	0	0	0	0	0	0	2	7	-2.09436	#N/A	#N/A
1938	NM_001076246	540853	SNAP25	synaptosome associated protein 25 (SNAP25), mRNA.	1	1	2	0	0	0	3	2	5	4	3	7	0	0	0	0	0	0	0	0	0	0	7	#N/A	#N/A	#N/A
1951	NM_001076271	613357	ERP29	endoplasmic reticulum protein 29 (ERP29), mRNA.	6	0	6	0	0	0	0	1	1	6	1	7	0	0	0	0	0	0	0	0	0	0	7	1.55357	#N/A	#N/A
1965	NM_001076294	613890	KCNJ16	potassium inwardly rectifying channel subfamily J member 16 (KCNJ16), mRNA.	0	0	0	0	1	1	0	0	0	0	1	1	0	3	3	0	0	0	0	0	0	6	7	#N/A	1	#N/A
1978	NM_001076317	614242	RAB8B	RAB8B, member RAS oncogene family (RAB8B), mRNA.	2	4	6	0	0	0	0	1	1	2	5	7	0	0	0	0	0	0	0	0	0	0	7	#N/A	#N/A	#N/A
2004	NM_001076361	615133	ACTR8	actin related protein 8 (ACTR8), mRNA.	1	1	2	0	0	0	1	0	1	2	1	3	2	0	2	0	0	0	0	0	0	4	7	#N/A	#N/A	#N/A
2020	NM_001076392	615724	FRA10AC1	FRA10A associated CGG repeat 1 (FRA10AC1), mRNA.	3	3	6	0	0	0	1	0	1	4	3	7	0	0	0	0	0	0	0	0	0	0	7	#N/A	#N/A	#N/A
2030	NM_001076420	616367	EMCN	endomucin (EMCN), mRNA.	5	2	7	0	0	0	0	0	0	5	2	7	0	0	0	0	0	0	0	0	0	0	7	#N/A	#N/A	#N/A
2059	NM_001076474	617710	BCAS4	breast carcinoma amplified sequence 4 (BCAS4), mRNA.	6	1	7	0	0	0	0	0	0	6	1	7	0	0	0	0	0	0	0	0	0	0	7	#N/A	#N/A	#N/A
2062	NM_001076478	617807	PSMF1	proteasome inhibitor subunit 1 (PSMF1), mRNA.	2	1	3	0	1	1	1	2	3	3	4	7	0	0	0	0	0	0	0	0	0	0	7	#N/A	#N/A	#N/A
2152	NM_001076880	528425	NUDCD1	NudC domain containing 1 (NUDCD1), mRNA.	2	1	3	0	0	0	4	0	4	6	1	7	0	0	0	0	0	0	0	0	0	0	7	#N/A	#N/A	#N/A
2219	NM_001076991	767914	C2H2orf88	chromosome 2 C2orf88 homolog (C2H2orf88), mRNA.	7	0	7	0	0	0	0	0	0	7	0	7	0	0	0	0	0	0	0	0	0	0	7	#N/A	#N/A	#N/A
2258	NM_001077066	768006	GPR161	G protein-coupled receptor 161 (GPR161), mRNA.	1	4	5	0	0	0	2	0	2	3	4	7	0	0	0	0	0	0	0	0	0	0	7	#N/A	#N/A	#N/A
2328	NM_001077890	509367	CLEC14A	C-type lectin domain containing 14A (CLEC14A), mRNA.	5	0	5	0	0	0	0	0	0	5	0	5	1	0	1	0	0	0	0	0	0	2	7	#N/A	1	CLEC14A
2357	NM_001077949	522301	MROH7	maestro heat-like repeat family member 7 (MROH7), mRNA.	0	5	5	0	0	0	0	0	0	0	5	5	0	1	1	0	0	0	0	0	0	2	7	#N/A	#N/A	#N/A
2396	NM_001078008	535940	TNNI3K	TNNI3 interacting kinase (TNNI3K), mRNA.	5	2	7	0	0	0	0	0	0	5	2	7	0	0	0	0	0	0	0	0	0	0	7	#N/A	#N/A	#N/A
2440	NM_001078105	768230	CYYR1	cysteine and tyrosine rich 1 (CYYR1), mRNA.	2	2	4	0	0	0	0	3	3	2	5	7	0	0	0	0	0	0	0	0	0	0	7	#N/A	#N/A	#N/A
2482	NM_001079598	519774	DNAAF9	dynein axonemal assembly factor 9 (DNAAF9), mRNA.	4	2	6	0	0	0	0	1	1	4	3	7	0	0	0	0	0	0	0	0	0	0	7	#N/A	#N/A	#N/A
2486	NM_001079604	529904	GRIA4	glutamate ionotropic receptor AMPA type subunit 4 (GRIA4), mRNA.	3	2	5	0	0	0	0	2	2	3	4	7	0	0	0	0	0	0	0	0	0	0	7	#N/A	#N/A	#N/A
2495	NM_001079626	616795	FAIM	Fas apoptotic inhibitory molecule (FAIM), mRNA.	0	3	3	0	0	0	4	0	4	4	3	7	0	0	0	0	0	0	0	0	0	0	7	#N/A	#N/A	#N/A
2501	NM_001079640	780784	TMOD1	tropomodulin 1 (TMOD1), mRNA.	0	0	0	0	0	0	0	7	7	0	7	7	0	0	0	0	0	0	0	0	0	0	7	#N/A	#N/A	#N/A
2525	NM_001080223	504503	SLC29A3	solute carrier family 29 member 3 (SLC29A3), mRNA.	3	3	6	0	0	0	0	1	1	3	4	7	0	0	0	0	0	0	0	0	0	0	7	-1.55351	#N/A	#N/A
2625	NM_001081522	514220	TMEM184B	transmembrane protein 184B (TMEM184B), mRNA.	5	0	5	0	0	0	0	2	2	5	2	7	0	0	0	0	0	0	0	0	0	0	7	#N/A	#N/A	#N/A
2640	NM_001081581	280969	ABAT	4-aminobutyrate aminotransferase (ABAT), mRNA; nuclear gene for mitochondrial product.	5	2	7	0	0	0	0	0	0	5	2	7	0	0	0	0	0	0	0	0	0	0	7	#N/A	#N/A	#N/A
2703	NM_001082438	518158	ADPGK	ADP dependent glucokinase (ADPGK), mRNA.	3	4	7	0	0	0	0	0	0	3	4	7	0	0	0	0	0	0	0	0	0	0	7	#N/A	#N/A	#N/A
2718	NM_001082461	616916	REEP1	receptor accessory protein 1 (REEP1), mRNA.	1	0	1	0	0	0	3	3	6	4	3	7	0	0	0	0	0	0	0	0	0	0	7	#N/A	#N/A	REEP1
2735	NM_001083375	505212	HSD17B7	hydroxysteroid 17-beta dehydrogenase 7 (HSD17B7), mRNA.	0	7	7	0	0	0	0	0	0	0	7	7	0	0	0	0	0	0	0	0	0	0	7	3.00067	#N/A	#N/A
2744	NM_001083388	508076	COL18A1	collagen type XVIII alpha 1 chain (COL18A1), mRNA.	1	6	7	0	0	0	0	0	0	1	6	7	0	0	0	0	0	0	0	0	0	0	7	#N/A	#N/A	#N/A
2826	NM_001083649	506971	RASGEF1B	RasGEF domain family member 1B (RASGEF1B), mRNA.	3	1	4	1	0	1	2	0	2	6	1	7	0	0	0	0	0	0	0	0	0	0	7	1.19268	#N/A	#N/A
2842	NM_001083685	514991	ABCE1	ATP binding cassette subfamily E member 1 (ABCE1), mRNA.	6	0	6	0	0	0	0	1	1	6	1	7	0	0	0	0	0	0	0	0	0	0	7	#N/A	#N/A	#N/A
2860	NM_001083718	533228	RILPL2	Rab interacting lysosomal protein like 2 (RILPL2), mRNA.	5	0	5	1	1	2	0	0	0	6	1	7	0	0	0	0	0	0	0	0	0	0	7	#N/A	#N/A	#N/A
2885	NM_001083762	613974	ZFAND2A	zinc finger AN1-type containing 2A (ZFAND2A), mRNA.	2	1	3	0	1	1	0	3	3	2	5	7	0	0	0	0	0	0	0	0	0	0	7	#N/A	#N/A	#N/A
2902	NM_001083791	785404	SH3BGRL2	SH3 domain binding glutamate rich protein like 2 (SH3BGRL2), mRNA.	7	0	7	0	0	0	0	0	0	7	0	7	0	0	0	0	0	0	0	0	0	0	7	3.43871	#N/A	SH3BGRL2
2930	NM_001098003	509611	TMCO3	transmembrane and coiled-coil domains 3 (TMCO3), mRNA.	2	3	5	0	1	1	0	1	1	2	5	7	0	0	0	0	0	0	0	0	0	0	7	#N/A	#N/A	#N/A
2973	NM_001098085	535744	CPNE8	copine 8 (CPNE8), mRNA.	1	3	4	0	0	0	2	1	3	3	4	7	0	0	0	0	0	0	0	0	0	0	7	#N/A	#N/A	#N/A
2975	NM_001098087	535998	EPS15	epidermal growth factor receptor pathway substrate 15 (EPS15), mRNA.	1	4	5	0	0	0	0	2	2	1	6	7	0	0	0	0	0	0	0	0	0	0	7	#N/A	#N/A	#N/A
2979	NM_001098093	537907	DENND2B	DENN domain containing 2B (DENND2B), mRNA.	6	1	7	0	0	0	0	0	0	6	1	7	0	0	0	0	0	0	0	0	0	0	7	#N/A	#N/A	#N/A
2983	NM_001098100	539292	PARD6G	par-6 family cell polarity regulator gamma (PARD6G), mRNA.	1	4	5	1	0	1	1	0	1	3	4	7	0	0	0	0	0	0	0	0	0	0	7	#N/A	#N/A	#N/A
2998	NM_001098122	540947	SS18	SS18 subunit of BAF chromatin remodeling complex (SS18), mRNA.	6	1	7	0	0	0	0	0	0	6	1	7	0	0	0	0	0	0	0	0	0	0	7	#N/A	#N/A	#N/A
3037	NM_001098868	504851	BOK	BCL2 family apoptosis regulator BOK (BOK), mRNA.	0	3	3	0	0	0	0	0	0	0	3	3	1	1	2	0	0	0	0	0	0	4	7	#N/A	#N/A	#N/A
3045	NM_001098881	505940	ARHGEF2	Rho/Rac guanine nucleotide exchange factor (GEF) 2 (ARHGEF2), mRNA.	5	0	5	0	0	0	0	2	2	5	2	7	0	0	0	0	0	0	0	0	0	0	7	#N/A	#N/A	#N/A
3057	NM_001098904	507932	COPS3	COP9 signalosome subunit 3 (COPS3), mRNA.	4	1	5	1	0	1	1	0	1	6	1	7	0	0	0	0	0	0	0	0	0	0	7	#N/A	#N/A	#N/A
3080	NM_001098948	512584	SNRPA1	small nuclear ribonucleoprotein polypeptide A' (SNRPA1), mRNA.	0	5	5	0	0	0	2	0	2	2	5	7	0	0	0	0	0	0	0	0	0	0	7	#N/A	#N/A	#N/A
3090	NM_001098976	515029	UPP1	uridine phosphorylase 1 (UPP1), mRNA.	6	0	6	0	0	0	0	1	1	6	1	7	0	0	0	0	0	0	0	0	0	0	7	#N/A	#N/A	UPP1
3153	NM_001099073	536009	TTC29	tetratricopeptide repeat domain 29 (TTC29), mRNA.	4	3	7	0	0	0	0	0	0	4	3	7	0	0	0	0	0	0	0	0	0	0	7	#N/A	#N/A	#N/A
3159	NM_001099082	538184	POLR2B	RNA polymerase II subunit B (POLR2B), mRNA.	1	1	2	0	0	0	2	3	5	3	4	7	0	0	0	0	0	0	0	0	0	0	7	#N/A	#N/A	#N/A
3237	NM_001099701	510683	PINK1	PTEN induced kinase 1 (PINK1), mRNA; nuclear gene for mitochondrial product.	0	5	5	1	0	1	1	0	1	2	5	7	0	0	0	0	0	0	0	0	0	0	7	#N/A	#N/A	#N/A
3276	NM_001100326	508658	PTPN1	protein tyrosine phosphatase non-receptor type 1 (PTPN1), mRNA.	5	2	7	0	0	0	0	0	0	5	2	7	0	0	0	0	0	0	0	0	0	0	7	#N/A	#N/A	#N/A
3288	NM_001100345	511799	P3H2	prolyl 3-hydroxylase 2 (P3H2), mRNA.	2	3	5	0	0	0	1	1	2	3	4	7	0	0	0	0	0	0	0	0	0	0	7	#N/A	#N/A	#N/A
3296	NM_001100363	514456	GPD1L	glycerol-3-phosphate dehydrogenase 1 like (GPD1L), mRNA.	0	7	7	0	0	0	0	0	0	0	7	7	0	0	0	0	0	0	0	0	0	0	7	#N/A	#N/A	#N/A
3391	NM_001101187	539174	MTMR9	myotubularin related protein 9 (MTMR9), mRNA.	4	2	6	0	1	1	0	0	0	4	3	7	0	0	0	0	0	0	0	0	0	0	7	1.36906	#N/A	#N/A
3453	NM_001101844	504835	MRPL1	mitochondrial ribosomal protein L1 (MRPL1), mRNA; nuclear gene for mitochondrial product.	1	0	1	2	1	3	1	2	3	4	3	7	0	0	0	0	0	0	0	0	0	0	7	#N/A	#N/A	#N/A
3489	NM_001101914	509556	NINJ2	ninjurin 2 (NINJ2), mRNA.	4	3	7	0	0	0	0	0	0	4	3	7	0	0	0	0	0	0	0	0	0	0	7	#N/A	#N/A	#N/A
3507	NM_001101961	512704	REEP3	receptor accessory protein 3 (REEP3), mRNA.	3	4	7	0	0	0	0	0	0	3	4	7	0	0	0	0	0	0	0	0	0	0	7	#N/A	#N/A	#N/A
3510	NM_001101965	512887	FAM149A	family with sequence similarity 149 member A (FAM149A), mRNA.	0	4	4	0	0	0	3	0	3	3	4	7	0	0	0	0	0	0	0	0	0	0	7	#N/A	#N/A	#N/A
3548	NM_001102029	515680	NFX1	nuclear transcription factor, X-box binding 1 (NFX1), mRNA.	5	0	5	0	0	0	0	0	0	5	0	5	1	0	1	0	0	0	0	0	0	2	7	#N/A	#N/A	#N/A
3553	NM_001102040	516952	SATB1	SATB homeobox 1 (SATB1), mRNA.	4	3	7	0	0	0	0	0	0	4	3	7	0	0	0	0	0	0	0	0	0	0	7	#N/A	#N/A	#N/A
3558	NM_001102045	517846	FCRL1	Fc receptor like 1 (FCRL1), mRNA.	5	2	7	0	0	0	0	0	0	5	2	7	0	0	0	0	0	0	0	0	0	0	7	#N/A	#N/A	#N/A
3585	NM_001102084	524622	NELL2	neural EGFL like 2 (NELL2), mRNA.	0	6	6	1	0	1	0	0	0	1	6	7	0	0	0	0	0	0	0	0	0	0	7	2.5404	#N/A	#N/A
3594	NM_001102095	525800	CCDC85A	coiled-coil domain containing 85A (CCDC85A), mRNA.	2	4	6	0	0	0	1	0	1	3	4	7	0	0	0	0	0	0	0	0	0	0	7	#N/A	#N/A	#N/A
3621	NM_001102137	531552	ACSS3	acyl-CoA synthetase short chain family member 3 (ACSS3), mRNA; nuclear gene for mitochondrial product.	3	4	7	0	0	0	0	0	0	3	4	7	0	0	0	0	0	0	0	0	0	0	7	#N/A	#N/A	ACSS3
3633	NM_001102154	533243	ZNF143	zinc finger protein 143 (ZNF143), mRNA.	5	0	5	0	1	1	0	1	1	5	2	7	0	0	0	0	0	0	0	0	0	0	7	#N/A	#N/A	#N/A
3649	NM_001102178	534781	PBK	PDZ binding kinase (PBK), mRNA.	5	0	5	0	0	0	0	2	2	5	2	7	0	0	0	0	0	0	0	0	0	0	7	#N/A	#N/A	#N/A
3661	NM_001102201	537391	DDAH1	dimethylarginine dimethylaminohydrolase 1 (DDAH1), mRNA.	0	6	6	1	0	1	0	0	0	1	6	7	0	0	0	0	0	0	0	0	0	0	7	4.24508	#N/A	DDAH1
3689	NM_001102249	540878	GPATCH2	G-patch domain containing 2 (GPATCH2), mRNA.	0	5	5	0	0	0	2	0	2	2	5	7	0	0	0	0	0	0	0	0	0	0	7	#N/A	#N/A	#N/A
3717	NM_001102296	616008	IL13RA2	interleukin 13 receptor subunit alpha 2 (IL13RA2), mRNA.	0	1	1	0	0	0	0	6	6	0	7	7	0	0	0	0	0	0	0	0	0	0	7	#N/A	#N/A	#N/A
3785	NM_001102514	533760	GRIK1	glutamate ionotropic receptor kainate type subunit 1 (GRIK1), mRNA.	5	2	7	0	0	0	0	0	0	5	2	7	0	0	0	0	0	0	0	0	0	0	7	#N/A	#N/A	#N/A
3819	NM_001103108	100125222	RAVER1	ribonucleoprotein, PTB binding 1 (RAVER1), mRNA.	4	0	4	0	1	1	0	2	2	4	3	7	0	0	0	0	0	0	0	0	0	0	7	#N/A	#N/A	#N/A
3864	NM_001103296	540693	AP1S3	adaptor related protein complex 1 subunit sigma 3 (AP1S3), mRNA.	4	1	5	0	0	0	2	0	2	6	1	7	0	0	0	0	0	0	0	0	0	0	7	#N/A	#N/A	#N/A
3886	NM_001103342	100125309	TSC22D3	TSC22 domain family member 3 (TSC22D3), mRNA.	0	2	2	2	0	2	3	0	3	5	2	7	0	0	0	0	0	0	0	0	0	0	7	1.16545	#N/A	#N/A
3926	NM_001105021	788792	FARSB	phenylalanyl-tRNA synthetase subunit beta (FARSB), mRNA.	1	0	1	0	0	0	0	4	4	1	4	5	1	0	1	0	0	0	0	0	0	2	7	#N/A	#N/A	#N/A
3976	NM_001105389	523017	NDUFAF6	NADH:ubiquinone oxidoreductase complex assembly factor 6 (NDUFAF6), mRNA.	2	0	2	0	0	0	0	3	3	2	3	5	1	0	1	0	0	0	0	0	0	2	7	#N/A	#N/A	#N/A
4008	NM_001105461	784225	FLACC1	flagellum associated containing coiled-coil domains 1 (FLACC1), mRNA.	1	0	1	0	0	0	1	3	4	2	3	5	0	0	0	0	0	0	0	1	1	2	7	#N/A	#N/A	#N/A
4067	NM_001109967	100126183	PPDPFL	pancreatic progenitor cell differentiation and proliferation factor like (PPDPFL), mRNA.	0	3	3	0	0	0	2	0	2	2	3	5	0	0	0	0	1	1	0	0	0	2	7	#N/A	#N/A	#N/A
4071	NM_001109999	532119	BDKRB1	bradykinin receptor B1 (BDKRB1), mRNA.	3	3	6	0	0	0	1	0	1	4	3	7	0	0	0	0	0	0	0	0	0	0	7	#N/A	#N/A	#N/A
4113	NM_001113222	508607	UIMC1	ubiquitin interaction motif containing 1 (UIMC1), transcript variant 2, mRNA.	2	1	3	0	0	0	0	2	2	2	3	5	0	0	0	0	0	0	1	0	1	2	7	#N/A	#N/A	#N/A
4116	NM_001113233	514559	TTL	tubulin tyrosine ligase (TTL), mRNA.	1	6	7	0	0	0	0	0	0	1	6	7	0	0	0	0	0	0	0	0	0	0	7	#N/A	#N/A	#N/A
4194	NM_001135792	539465	SLC7A1	solute carrier family 7 member 1 (SLC7A1), mRNA.	0	2	2	1	0	1	0	0	0	1	2	3	0	1	1	0	0	0	1	0	1	4	7	#N/A	#N/A	#N/A
4204	NM_001143846	281971	PDE2A	phosphodiesterase 2A (PDE2A), transcript variant 1, mRNA.	2	2	4	1	0	1	0	2	2	3	4	7	0	0	0	0	0	0	0	0	0	0	7	#N/A	#N/A	#N/A
4249	NM_001146692	617677	EFCC1	EF-hand and coiled-coil domain containing 1 (EFCC1), mRNA.	0	0	0	0	0	0	1	0	1	1	0	1	0	0	0	0	0	0	3	0	3	6	7	#N/A	#N/A	#N/A
4288	NM_001164670	508171	FAN1	FANCD2 and FANCI associated nuclease 1 (FAN1), mRNA.	0	6	6	0	0	0	1	0	1	1	6	7	0	0	0	0	0	0	0	0	0	0	7	#N/A	#N/A	#N/A
4307	NM_001166523	286855	MTFMT	mitochondrial methionyl-tRNA formyltransferase (MTFMT), mRNA; nuclear gene for mitochondrial product.	2	3	5	0	0	0	0	0	0	2	3	5	0	1	1	0	0	0	0	0	0	2	7	#N/A	#N/A	#N/A
4311	NM_001166528	281561	UCP1	uncoupling protein 1 (UCP1), mRNA; nuclear gene for mitochondrial product.	5	0	5	0	0	0	0	2	2	5	2	7	0	0	0	0	0	0	0	0	0	0	7	#N/A	#N/A	#N/A
4401	NM_001191193	535508	HMGCLL1	3-hydroxymethyl-3-methylglutaryl-CoA lyase like 1 (HMGCLL1), mRNA.	1	5	6	0	0	0	0	1	1	1	6	7	0	0	0	0	0	0	0	0	0	0	7	#N/A	#N/A	#N/A
4427	NM_001191262	539131	ADGRF2	adhesion G protein-coupled receptor F2 (ADGRF2), mRNA.	7	0	7	0	0	0	0	0	0	7	0	7	0	0	0	0	0	0	0	0	0	0	7	#N/A	#N/A	#N/A
4453	NM_001191315	100139986	ANO3	anoctamin 3 (ANO3), mRNA.	1	5	6	0	0	0	0	1	1	1	6	7	0	0	0	0	0	0	0	0	0	0	7	#N/A	#N/A	#N/A
4456	NM_001191326	100139484	RAPGEF2	Rap guanine nucleotide exchange factor 2 (RAPGEF2), mRNA.	3	4	7	0	0	0	0	0	0	3	4	7	0	0	0	0	0	0	0	0	0	0	7	1.23728	#N/A	#N/A
4486	NM_001191370	783645	VCL	vinculin (VCL), mRNA.	7	0	7	0	0	0	0	0	0	7	0	7	0	0	0	0	0	0	0	0	0	0	7	#N/A	#N/A	#N/A
4508	NM_001191419	517332	GRAMD1B	GRAM domain containing 1B (GRAMD1B), mRNA.	5	2	7	0	0	0	0	0	0	5	2	7	0	0	0	0	0	0	0	0	0	0	7	#N/A	#N/A	#N/A
4527	NM_001191454	522442	FANCI	FA complementation group I (FANCI), mRNA.	6	0	6	0	0	0	0	1	1	6	1	7	0	0	0	0	0	0	0	0	0	0	7	-2.80321	#N/A	#N/A
4565	NM_001191528	539825	MAST1	microtubule associated serine/threonine kinase 1 (MAST1), mRNA.	1	5	6	0	0	0	1	0	1	2	5	7	0	0	0	0	0	0	0	0	0	0	7	#N/A	#N/A	#N/A
4568	NM_001191533	508045	PPP2R2A	protein phosphatase 2 regulatory subunit Balpha (PPP2R2A), mRNA.	1	5	6	1	0	1	0	0	0	2	5	7	0	0	0	0	0	0	0	0	0	0	7	#N/A	#N/A	#N/A
4582	NM_001192027	538489	ZNF484	zinc finger protein 484 (ZNF484), mRNA.	2	5	7	0	0	0	0	0	0	2	5	7	0	0	0	0	0	0	0	0	0	0	7	#N/A	#N/A	#N/A
4608	NM_001192082	506030	IL17F	interleukin 17F (IL17F), mRNA.	3	2	5	0	0	0	0	0	0	3	2	5	0	1	1	0	0	0	0	0	0	2	7	#N/A	#N/A	IL17F
4691	NM_001192253	510334	NEURL1	neuralized E3 ubiquitin protein ligase 1 (NEURL1), mRNA.	2	1	3	0	0	0	1	3	4	3	4	7	0	0	0	0	0	0	0	0	0	0	7	#N/A	#N/A	#N/A
4729	NM_001192327	512637	ADGRF1	adhesion G protein-coupled receptor F1 (ADGRF1), mRNA.	4	1	5	0	1	1	0	1	1	4	3	7	0	0	0	0	0	0	0	0	0	0	7	3.01104	#N/A	#N/A
4756	NM_001192379	514624	STARD10	StAR related lipid transfer domain containing 10 (STARD10), mRNA.	4	1	5	0	1	1	1	0	1	5	2	7	0	0	0	0	0	0	0	0	0	0	7	#N/A	#N/A	#N/A
4799	NM_001192466	517316	KLHL14	kelch like family member 14 (KLHL14), mRNA.	3	1	4	0	1	1	0	2	2	3	4	7	0	0	0	0	0	0	0	0	0	0	7	#N/A	#N/A	#N/A
4804	NM_001192477	517699	CATSPER2	cation channel sperm associated 2 (CATSPER2), mRNA.	1	5	6	0	0	0	1	0	1	2	5	7	0	0	0	0	0	0	0	0	0	0	7	#N/A	#N/A	#N/A
4827	NM_001192512	519706	NPHS1	NPHS1 adhesion molecule, nephrin (NPHS1), mRNA.	4	0	4	0	0	0	0	1	1	4	1	5	1	0	1	0	0	0	0	0	0	2	7	#N/A	#N/A	#N/A
4883	NM_001192598	524536	SYDE2	synapse defective Rho GTPase homolog 2 (SYDE2), mRNA.	1	4	5	0	0	0	2	0	2	3	4	7	0	0	0	0	0	0	0	0	0	0	7	3.03183	#N/A	#N/A
4946	NM_001192701	530961	BARD1	BRCA1 associated RING domain 1 (BARD1), mRNA.	0	0	0	0	0	0	3	2	5	3	2	5	0	0	0	0	0	0	1	0	1	2	7	#N/A	#N/A	#N/A
5068	NM_001192875	536286	ITGB8	integrin subunit beta 8 (ITGB8), mRNA.	1	5	6	1	0	1	0	0	0	2	5	7	0	0	0	0	0	0	0	0	0	0	7	#N/A	#N/A	#N/A
5078	NM_001192888	536815	ROBO1	roundabout guidance receptor 1 (ROBO1), mRNA.	3	4	7	0	0	0	0	0	0	3	4	7	0	0	0	0	0	0	0	0	0	0	7	#N/A	#N/A	#N/A
5103	NM_001192921	537804	GRIN2B	glutamate ionotropic receptor NMDA type subunit 2B (GRIN2B), mRNA.	3	4	7	0	0	0	0	0	0	3	4	7	0	0	0	0	0	0	0	0	0	0	7	#N/A	#N/A	#N/A
5123	NM_001192948	505341	HCFC2	host cell factor C2 (HCFC2), mRNA.	4	0	4	0	0	0	0	3	3	4	3	7	0	0	0	0	0	0	0	0	0	0	7	#N/A	#N/A	#N/A
5252	NM_001193150	617287	TRAM2	translocation associated membrane protein 2 (TRAM2), mRNA.	7	0	7	0	0	0	0	0	0	7	0	7	0	0	0	0	0	0	0	0	0	0	7	#N/A	#N/A	#N/A
5263	NM_001193168	512144	VPS53	VPS53 subunit of GARP complex (VPS53), mRNA.	2	4	6	0	0	0	0	1	1	2	5	7	0	0	0	0	0	0	0	0	0	0	7	#N/A	#N/A	#N/A
5304	NM_001193239	530692	UNC13B	unc-13 homolog B (UNC13B), mRNA.	4	1	5	0	0	0	0	2	2	4	3	7	0	0	0	0	0	0	0	0	0	0	7	2.64225	#N/A	#N/A
5323	NM_001195051	617407	COPS9	COP9 signalosome subunit 9 (COPS9), mRNA.	2	1	3	0	0	0	0	0	0	2	1	3	1	1	2	0	0	0	0	0	0	4	7	#N/A	#N/A	#N/A
5353	NM_001205356	100848466	PGR	progesterone receptor (PGR), mRNA.	0	0	0	0	0	0	6	1	7	6	1	7	0	0	0	0	0	0	0	0	0	0	7	#N/A	#N/A	#N/A
5364	NM_001205394	536075	TXNDC16	thioredoxin domain containing 16 (TXNDC16), mRNA.	2	5	7	0	0	0	0	0	0	2	5	7	0	0	0	0	0	0	0	0	0	0	7	#N/A	#N/A	#N/A
5396	NM_001205452	785203	METTL24	methyltransferase like 24 (METTL24), mRNA.	0	5	5	0	0	0	0	2	2	0	7	7	0	0	0	0	0	0	0	0	0	0	7	#N/A	#N/A	#N/A
5419	NM_001205490	514014	ATP23	ATP23 metallopeptidase and ATP synthase assembly factor homolog (ATP23), mRNA; nuclear gene for mitochondrial product.	2	3	5	0	0	0	1	1	2	3	4	7	0	0	0	0	0	0	0	0	0	0	7	#N/A	#N/A	#N/A
5423	NM_001205494	616962	C16H1orf105	chromosome 16 C1orf105 homolog (C16H1orf105), mRNA.	5	0	5	0	1	1	0	1	1	5	2	7	0	0	0	0	0	0	0	0	0	0	7	#N/A	#N/A	#N/A
5431	NM_001205504	100140945	CASP9	caspase 9 (CASP9), mRNA.	3	3	6	0	0	0	0	1	1	3	4	7	0	0	0	0	0	0	0	0	0	0	7	#N/A	#N/A	#N/A
5444	NM_001205531	505285	PTPRE	protein tyrosine phosphatase receptor type E (PTPRE), mRNA.	7	0	7	0	0	0	0	0	0	7	0	7	0	0	0	0	0	0	0	0	0	0	7	#N/A	#N/A	#N/A
5460	NM_001205565	505228	THRAP3	thyroid hormone receptor associated protein 3 (THRAP3), mRNA.	5	2	7	0	0	0	0	0	0	5	2	7	0	0	0	0	0	0	0	0	0	0	7	#N/A	#N/A	#N/A
5474	NM_001205594	282856	PCK2	phosphoenolpyruvate carboxykinase 2, mitochondrial (PCK2), mRNA; nuclear gene for mitochondrial product.	3	2	5	0	0	0	0	0	0	3	2	5	1	0	1	0	0	0	0	0	0	2	7	#N/A	#N/A	#N/A
5492	NM_001205630	508193	SLC39A8	solute carrier family 39 member 8 (SLC39A8), mRNA.	3	3	6	1	0	1	0	0	0	4	3	7	0	0	0	0	0	0	0	0	0	0	7	2.66638	#N/A	#N/A
5531	NM_001205708	511853	TTLL4	tubulin tyrosine ligase like 4 (TTLL4), mRNA.	2	1	3	0	0	0	1	1	2	3	2	5	1	0	1	0	0	0	0	0	0	2	7	#N/A	#N/A	#N/A
5535	NM_001205716	539807	ZNFX1	zinc finger NFX1-type containing 1 (ZNFX1), mRNA.	2	3	5	1	0	1	0	1	1	3	4	7	0	0	0	0	0	0	0	0	0	0	7	1.92765	#N/A	#N/A
5594	NM_001205823	515944	MFSD8	major facilitator superfamily domain containing 8 (MFSD8), mRNA.	2	4	6	0	0	0	1	0	1	3	4	7	0	0	0	0	0	0	0	0	0	0	7	#N/A	#N/A	#N/A
5663	NM_001205932	526631	ARHGEF37	Rho guanine nucleotide exchange factor (GEF) 37 (ARHGEF37), mRNA.	5	1	6	0	0	0	1	0	1	6	1	7	0	0	0	0	0	0	0	0	0	0	7	#N/A	#N/A	#N/A
5692	NM_001205977	530344	PPEF2	protein phosphatase with EF-hand domain 2 (PPEF2), mRNA.	0	2	2	0	0	0	1	4	5	1	6	7	0	0	0	0	0	0	0	0	0	0	7	#N/A	#N/A	#N/A
5695	NM_001205981	530744	CCNK	cyclin K (CCNK), mRNA.	0	5	5	0	0	0	0	0	0	0	5	5	1	0	1	0	0	0	0	0	0	2	7	#N/A	#N/A	#N/A
5745	NM_001206062	534774	BACE2	beta-secretase 2 (BACE2), mRNA.	2	2	4	0	0	0	0	3	3	2	5	7	0	0	0	0	0	0	0	0	0	0	7	#N/A	#N/A	#N/A
5757	NM_001206076	535264	XPOT	exportin for tRNA (XPOT), mRNA.	5	0	5	0	0	0	0	0	0	5	0	5	1	0	1	0	0	0	0	0	0	2	7	#N/A	#N/A	#N/A
5766	NM_001206090	535834	SRD5A3	steroid 5 alpha-reductase 3 (SRD5A3), mRNA.	1	0	1	0	0	0	2	2	4	3	2	5	0	0	0	0	0	0	1	0	1	2	7	#N/A	#N/A	#N/A
5767	NM_001206091	536093	DHX8	DEAH-box helicase 8 (DHX8), mRNA.	4	2	6	1	0	1	0	0	0	5	2	7	0	0	0	0	0	0	0	0	0	0	7	#N/A	#N/A	#N/A
5771	NM_001206096	536417	SEMA3D	semaphorin 3D (SEMA3D), mRNA.	1	1	2	0	0	0	2	3	5	3	4	7	0	0	0	0	0	0	0	0	0	0	7	#N/A	#N/A	#N/A
5795	NM_001206133	534612	ARID4B	AT-rich interaction domain 4B (ARID4B), mRNA.	0	1	1	0	0	0	3	3	6	3	4	7	0	0	0	0	0	0	0	0	0	0	7	#N/A	#N/A	#N/A
5818	NM_001206166	514642	TRPM7	transient receptor potential cation channel subfamily M member 7 (TRPM7), mRNA.	1	1	2	0	0	0	1	2	3	2	3	5	0	0	0	0	0	0	1	0	1	2	7	#N/A	#N/A	#N/A
5826	NM_001206176	507643	CLCA1	chloride channel accessory 1 (CLCA1), mRNA.	0	3	3	2	0	2	0	0	0	2	3	5	0	1	1	0	0	0	0	0	0	2	7	#N/A	#N/A	#N/A
5886	NM_001206288	618056	SH3BP5	SH3 domain binding protein 5 (SH3BP5), mRNA.	7	0	7	0	0	0	0	0	0	7	0	7	0	0	0	0	0	0	0	0	0	0	7	2.45155	#N/A	#N/A
5914	NM_001206350	100137734	PILRA	paired immunoglobin like type 2 receptor alpha (PILRA), mRNA.	1	5	6	0	0	0	1	0	1	2	5	7	0	0	0	0	0	0	0	0	0	0	7	-1.98169	#N/A	#N/A
5950	NM_001206489	513059	ATAD5	ATPase family AAA domain containing 5 (ATAD5), mRNA.	2	4	6	0	0	0	1	0	1	3	4	7	0	0	0	0	0	0	0	0	0	0	7	#N/A	#N/A	#N/A
5953	NM_001206495	614936	ILF3	interleukin enhancer binding factor 3 (ILF3), mRNA.	6	0	6	0	0	0	0	1	1	6	1	7	0	0	0	0	0	0	0	0	0	0	7	#N/A	#N/A	#N/A
5974	NM_001206534	537201	JAK1	Janus kinase 1 (JAK1), mRNA.	4	2	6	0	0	0	0	1	1	4	3	7	0	0	0	0	0	0	0	0	0	0	7	1.92191	#N/A	#N/A
5984	NM_001206562	534500	NRCAM	neuronal cell adhesion molecule (NRCAM), mRNA.	4	2	6	1	0	1	0	0	0	5	2	7	0	0	0	0	0	0	0	0	0	0	7	#N/A	#N/A	NRCAM
6010	NM_001206608	530549	EFHB	EF-hand domain family member B (EFHB), mRNA.	2	5	7	0	0	0	0	0	0	2	5	7	0	0	0	0	0	0	0	0	0	0	7	#N/A	#N/A	#N/A
6018	NM_001206639	532721	USP42	ubiquitin specific peptidase 42 (USP42), mRNA.	1	4	5	0	0	0	2	0	2	3	4	7	0	0	0	0	0	0	0	0	0	0	7	#N/A	#N/A	#N/A
6020	NM_001206657	407770	PLXNA2	plexin A2 (PLXNA2), mRNA.	1	6	7	0	0	0	0	0	0	1	6	7	0	0	0	0	0	0	0	0	0	0	7	#N/A	#N/A	#N/A
6023	NM_001206674	618684	MBP	myelin basic protein (MBP), mRNA.	7	0	7	0	0	0	0	0	0	7	0	7	0	0	0	0	0	0	0	0	0	0	7	#N/A	#N/A	#N/A
6044	NM_001206719	613679	AGPS	alkylglycerone phosphate synthase (AGPS), mRNA.	1	2	3	0	2	2	2	0	2	3	4	7	0	0	0	0	0	0	0	0	0	0	7	#N/A	#N/A	#N/A
6061	NM_001206755	614438	FAM171B	family with sequence similarity 171 member B (FAM171B), mRNA.	1	3	4	0	0	0	3	0	3	4	3	7	0	0	0	0	0	0	0	0	0	0	7	#N/A	#N/A	#N/A
6066	NM_001206770	100295732	MAP2K5	mitogen-activated protein kinase kinase 5 (MAP2K5), mRNA.	2	4	6	0	0	0	0	1	1	2	5	7	0	0	0	0	0	0	0	0	0	0	7	#N/A	#N/A	#N/A
6085	NM_001206814	521541	IQSEC1	IQ motif and Sec7 domain ArfGEF 1 (IQSEC1), mRNA.	3	2	5	0	0	0	2	0	2	5	2	7	0	0	0	0	0	0	0	0	0	0	7	1.73333	#N/A	#N/A
6149	NM_001242565	280851	CD46	CD46 molecule (CD46), transcript variant 5, mRNA.	0	7	7	0	0	0	0	0	0	0	7	7	0	0	0	0	0	0	0	0	0	0	7	#N/A	#N/A	#N/A
6255	NM_001302935	101902938	HEATR4	HEAT repeat containing 4 (HEATR4), mRNA.	3	4	7	0	0	0	0	0	0	3	4	7	0	0	0	0	0	0	0	0	0	0	7	#N/A	#N/A	#N/A
6282	NM_001304988	506664	JADE3	jade family PHD finger 3 (JADE3), mRNA.	2	0	2	0	0	0	0	5	5	2	5	7	0	0	0	0	0	0	0	0	0	0	7	#N/A	#N/A	#N/A
6299	NM_001319883	100139049	KLRC1	killer cell lectin-like receptor subfamily C, member 1 (KLRC1), mRNA.	5	0	5	0	0	0	0	0	0	5	0	5	1	0	1	0	0	0	0	0	0	2	7	#N/A	#N/A	KLRC1
6311	NM_001354349	540661	BRWD1	bromodomain and WD repeat domain containing 1 (BRWD1), transcript variant 2, mRNA.	0	3	3	0	0	0	0	0	0	0	3	3	0	2	2	0	0	0	0	0	0	4	7	#N/A	#N/A	#N/A
6314	NM_001354464	506501	TERF2	telomeric repeat binding factor 2 (TERF2), transcript variant 2, mRNA.	0	6	6	1	0	1	0	0	0	1	6	7	0	0	0	0	0	0	0	0	0	0	7	#N/A	#N/A	TERF2
6354	NM_173908	280763	DDO	D-aspartate oxidase (DDO), mRNA.	1	6	7	0	0	0	0	0	0	1	6	7	0	0	0	0	0	0	0	0	0	0	7	#N/A	#N/A	#N/A
6420	NM_174045	281131	DSG1	desmoglein 1 (DSG1), mRNA.	4	2	6	1	0	1	0	0	0	5	2	7	0	0	0	0	0	0	0	0	0	0	7	#N/A	#N/A	#N/A
6431	NM_174063	281184	ASZ1	ankyrin repeat, SAM and basic leucine zipper domain containing 1 (ASZ1), mRNA.	0	7	7	0	0	0	0	0	0	0	7	7	0	0	0	0	0	0	0	0	0	0	7	#N/A	#N/A	#N/A
6463	NM_174137	281375	SERPINE1	serpin family E member 1 (SERPINE1), mRNA.	0	1	1	0	0	0	0	0	0	0	1	1	0	3	3	0	0	0	0	0	0	6	7	2.96384	#N/A	#N/A
6499	NM_174206	281553	TSHR	thyroid stimulating hormone receptor (TSHR), mRNA.	2	2	4	0	0	0	2	1	3	4	3	7	0	0	0	0	0	0	0	0	0	0	7	#N/A	#N/A	#N/A
6508	NM_174218	281576	WARS1	tryptophanyl-tRNA synthetase 1 (WARS1), mRNA.	4	3	7	0	0	0	0	0	0	4	3	7	0	0	0	0	0	0	0	0	0	0	7	#N/A	#N/A	#N/A
6667	NM_174507	282150	BCKDHB	branched chain keto acid dehydrogenase E1 subunit beta (BCKDHB), mRNA; nuclear gene for mitochondrial product.	0	5	5	1	0	1	1	0	1	2	5	7	0	0	0	0	0	0	0	0	0	0	7	#N/A	#N/A	#N/A
6683	NM_174536	282223	ENTPD1	ectonucleoside triphosphate diphosphohydrolase 1 (ENTPD1), mRNA.	4	1	5	0	0	0	0	0	0	4	1	5	1	0	1	0	0	0	0	0	0	2	7	#N/A	#N/A	#N/A
6731	NM_174631	282401	ADAMTS2	ADAM metallopeptidase with thrombospondin type 1 motif 2 (ADAMTS2), mRNA.	2	4	6	0	0	0	0	1	1	2	5	7	0	0	0	0	0	0	0	0	0	0	7	-1.92727	#N/A	#N/A
6767	NM_174703	282654	TNXB	tenascin XB (TNXB), mRNA.	0	7	7	0	0	0	0	0	0	0	7	7	0	0	0	0	0	0	0	0	0	0	7	#N/A	#N/A	#N/A
6784	NM_174747	282874	EVC	EvC ciliary complex subunit 1 (EVC), mRNA.	3	4	7	0	0	0	0	0	0	3	4	7	0	0	0	0	0	0	0	0	0	0	7	#N/A	#N/A	#N/A
6806	NM_174789	286854	SERPINB6	serpin peptidase inhibitor, clade B (ovalbumin), member 6 (SERPINB6), mRNA.	5	1	6	0	0	0	0	1	1	5	2	7	0	0	0	0	0	0	0	0	0	0	7	#N/A	#N/A	#N/A
6824	NM_174824	282091	PPP1R16B	protein phosphatase 1 regulatory subunit 16B (PPP1R16B), mRNA.	4	3	7	0	0	0	0	0	0	4	3	7	0	0	0	0	0	0	0	0	0	0	7	#N/A	#N/A	#N/A
6925	NM_181005	281070	CHGA	chromogranin A (CHGA), mRNA.	0	7	7	0	0	0	0	0	0	0	7	7	0	0	0	0	0	0	0	0	0	0	7	#N/A	#N/A	#N/A
6928	NM_181015	281427	PRNP	prion protein (PRNP), transcript variant 2, mRNA.	4	0	4	0	0	0	0	3	3	4	3	7	0	0	0	0	0	0	0	0	0	0	7	#N/A	#N/A	PRNP
30	NM_001001601	414735	CDH5	cadherin 5 (CDH5), mRNA.	4	2	6	0	0	0	0	0	0	4	2	6	0	0	0	0	0	0	0	0	0	0	6	#N/A	#N/A	#N/A
39	NM_001002892	444879	ST3GAL2	ST3 beta-galactoside alpha-2,3-sialyltransferase 2 (ST3GAL2), mRNA.	2	0	2	0	0	0	0	2	2	2	2	4	1	0	1	0	0	0	0	0	0	2	6	#N/A	#N/A	#N/A
50	NM_001007811	493708	CDK11B	cyclin dependent kinase 11B (CDK11B), mRNA.	0	2	2	0	0	0	4	0	4	4	2	6	0	0	0	0	0	0	0	0	0	0	6	#N/A	#N/A	#N/A
135	NM_001014939	530447	TBCB	tubulin folding cofactor B (TBCB), mRNA.	0	4	4	0	0	0	2	0	2	2	4	6	0	0	0	0	0	0	0	0	0	0	6	#N/A	#N/A	#N/A
177	NM_001015578	511908	EHD1	EH domain containing 1 (EHD1), mRNA.	2	3	5	0	1	1	0	0	0	2	4	6	0	0	0	0	0	0	0	0	0	0	6	#N/A	#N/A	#N/A
207	NM_001015643	532704	TBC1D7	TBC1 domain family member 7 (TBC1D7), mRNA.	1	3	4	0	0	0	2	0	2	3	3	6	0	0	0	0	0	0	0	0	0	0	6	#N/A	#N/A	#N/A
238	NM_001024475	505332	PISD	phosphatidylserine decarboxylase (PISD), mRNA; nuclear gene for mitochondrial product.	4	0	4	0	0	0	0	0	0	4	0	4	0	1	1	0	0	0	0	0	0	2	6	#N/A	#N/A	#N/A
264	NM_001024531	513479	RNF114	ring finger protein 114 (RNF114), mRNA.	2	3	5	0	0	0	1	0	1	3	3	6	0	0	0	0	0	0	0	0	0	0	6	#N/A	#N/A	#N/A
287	NM_001024693	535379	ABCA1	ATP binding cassette subfamily A member 1 (ABCA1), mRNA.	3	3	6	0	0	0	0	0	0	3	3	6	0	0	0	0	0	0	0	0	0	0	6	#N/A	#N/A	#N/A
300	NM_001030299	507991	MTRR	5-methyltetrahydrofolate-homocysteine methyltransferase reductase (MTRR), mRNA.	0	5	5	0	1	1	0	0	0	0	6	6	0	0	0	0	0	0	0	0	0	0	6	#N/A	#N/A	#N/A
375	NM_001034280	507130	LTA4H	leukotriene A4 hydrolase (LTA4H), mRNA.	4	2	6	0	0	0	0	0	0	4	2	6	0	0	0	0	0	0	0	0	0	0	6	#N/A	#N/A	#N/A
378	NM_001034287	507280	TM4SF18	transmembrane 4 L six family member 18 (TM4SF18), transcript variant 2, mRNA.	2	0	2	0	0	0	0	0	0	2	0	2	0	2	2	0	0	0	0	0	0	4	6	#N/A	#N/A	#N/A
402	NM_001034353	509546	ERGIC3	ERGIC and golgi 3 (ERGIC3), mRNA.	5	1	6	0	0	0	0	0	0	5	1	6	0	0	0	0	0	0	0	0	0	0	6	#N/A	#N/A	#N/A
429	NM_001034418	512205	RCSD1	RCSD domain containing 1 (RCSD1), mRNA.	2	4	6	0	0	0	0	0	0	2	4	6	0	0	0	0	0	0	0	0	0	0	6	#N/A	#N/A	#N/A
475	NM_001034531	518897	CHEK2	checkpoint kinase 2 (CHEK2), mRNA.	5	0	5	0	0	0	0	1	1	5	1	6	0	0	0	0	0	0	0	0	0	0	6	#N/A	#N/A	#N/A
490	NM_001034561	527885	ZDHHC9	zinc finger DHHC-type palmitoyltransferase 9 (ZDHHC9), mRNA.	5	0	5	0	0	0	0	1	1	5	1	6	0	0	0	0	0	0	0	0	0	0	6	#N/A	#N/A	#N/A
504	NM_001034586	533251	RANBP1	RAN binding protein 1 (RANBP1), mRNA.	0	2	2	0	0	0	0	0	0	0	2	2	0	2	2	0	0	0	0	0	0	4	6	#N/A	#N/A	#N/A
515	NM_001034611	534439	PDZK1	PDZ domain containing 1 (PDZK1), mRNA.	1	2	3	0	0	0	3	0	3	4	2	6	0	0	0	0	0	0	0	0	0	0	6	#N/A	#N/A	#N/A
522	NM_001034619	534898	ANKRD46	ankyrin repeat domain 46 (ANKRD46), mRNA.	1	1	2	0	0	0	0	0	0	1	1	2	0	2	2	0	0	0	0	0	0	4	6	#N/A	#N/A	#N/A
534	NM_001034640	537946	CDH6	cadherin 6 (CDH6), mRNA.	0	1	1	0	0	0	1	4	5	1	5	6	0	0	0	0	0	0	0	0	0	0	6	#N/A	#N/A	#N/A
597	NM_001034805	617901	MRPL13	mitochondrial ribosomal protein L13 (MRPL13), mRNA; nuclear gene for mitochondrial product.	4	1	5	0	0	0	0	1	1	4	2	6	0	0	0	0	0	0	0	0	0	0	6	#N/A	#N/A	#N/A
654	NM_001035098	511280	NMI	N-myc and STAT interactor (NMI), mRNA.	2	3	5	0	0	0	1	0	1	3	3	6	0	0	0	0	0	0	0	0	0	0	6	1.54988	#N/A	#N/A
656	NM_001035101	511528	GLRX3	glutaredoxin 3 (GLRX3), mRNA.	0	2	2	1	0	1	3	0	3	4	2	6	0	0	0	0	0	0	0	0	0	0	6	#N/A	#N/A	#N/A
664	NM_001035268	505177	ZNF207	zinc finger protein 207 (ZNF207), mRNA.	0	2	2	0	0	0	0	0	0	0	2	2	0	2	2	0	0	0	0	0	0	4	6	1.3673	#N/A	#N/A
679	NM_001035297	514615	COLQ	collagen like tail subunit of asymmetric acetylcholinesterase (COLQ), mRNA.	2	2	4	0	0	0	0	2	2	2	4	6	0	0	0	0	0	0	0	0	0	0	6	#N/A	#N/A	#N/A
724	NM_001035378	529246	TTLL9	tubulin tyrosine ligase like 9 (TTLL9), mRNA.	2	1	3	0	0	0	2	1	3	4	2	6	0	0	0	0	0	0	0	0	0	0	6	#N/A	#N/A	#N/A
726	NM_001035383	530879	PLEKHA2	pleckstrin homology domain containing A2 (PLEKHA2), mRNA.	1	0	1	0	0	0	5	0	5	6	0	6	0	0	0	0	0	0	0	0	0	0	6	#N/A	#N/A	#N/A
745	NM_001035418	537718	ARHGEF9	Cdc42 guanine nucleotide exchange factor 9 (ARHGEF9), mRNA.	0	2	2	0	0	0	3	1	4	3	3	6	0	0	0	0	0	0	0	0	0	0	6	#N/A	#N/A	#N/A
746	NM_001035425	539635	RIPOR2	RHO family interacting cell polarization regulator 2 (RIPOR2), mRNA.	1	5	6	0	0	0	0	0	0	1	5	6	0	0	0	0	0	0	0	0	0	0	6	#N/A	#N/A	#N/A
880	NM_001038101	513908	IFT52	intraflagellar transport 52 (IFT52), mRNA.	3	2	5	1	0	1	0	0	0	4	2	6	0	0	0	0	0	0	0	0	0	0	6	#N/A	#N/A	#N/A
899	NM_001038136	523361	C27H4orf47	chromosome 27 C4orf47 homolog (C27H4orf47), mRNA.	0	2	2	0	0	0	0	0	0	0	2	2	0	2	2	0	0	0	0	0	0	4	6	#N/A	#N/A	#N/A
904	NM_001038143	525659	GCLM	glutamate-cysteine ligase modifier subunit (GCLM), mRNA.	2	0	2	0	0	0	0	0	0	2	0	2	0	2	2	0	0	0	0	0	0	4	6	#N/A	#N/A	#N/A
906	NM_001038146	527889	CSNK1G1	casein kinase 1 gamma 1 (CSNK1G1), mRNA.	4	2	6	0	0	0	0	0	0	4	2	6	0	0	0	0	0	0	0	0	0	0	6	#N/A	#N/A	#N/A
912	NM_001038164	534927	PRCP	prolylcarboxypeptidase (PRCP), mRNA.	0	6	6	0	0	0	0	0	0	0	6	6	0	0	0	0	0	0	0	0	0	0	6	#N/A	#N/A	#N/A
920	NM_001038190	540543	ARGLU1	arginine and glutamate rich 1 (ARGLU1), mRNA.	1	1	2	0	0	0	0	0	0	1	1	2	1	1	2	0	0	0	0	0	0	4	6	#N/A	#N/A	#N/A
947	NM_001038518	515712	BOLA	MHC class I heavy chain (BOLA), transcript variant 1, mRNA.	2	2	4	0	0	0	0	0	0	2	2	4	0	1	1	0	0	0	0	0	0	2	6	#N/A	#N/A	BOLA
976	NM_001038669	507503	THAP4	THAP domain containing 4 (THAP4), mRNA.	2	3	5	0	0	0	0	1	1	2	4	6	0	0	0	0	0	0	0	0	0	0	6	#N/A	#N/A	#N/A
994	NM_001040483	286840	SDHB	succinate dehydrogenase complex iron sulfur subunit B (SDHB), mRNA; nuclear gene for mitochondrial product.	2	4	6	0	0	0	0	0	0	2	4	6	0	0	0	0	0	0	0	0	0	0	6	#N/A	#N/A	#N/A
1011	NM_001040521	513228	IFT43	intraflagellar transport 43 (IFT43), mRNA.	3	3	6	0	0	0	0	0	0	3	3	6	0	0	0	0	0	0	0	0	0	0	6	#N/A	#N/A	#N/A
1017	NM_001040535	516692	BPIFA3	BPI fold containing family A member 3 (BPIFA3), mRNA.	0	4	4	0	0	0	2	0	2	2	4	6	0	0	0	0	0	0	0	0	0	0	6	#N/A	#N/A	#N/A
1047	NM_001045874	407100	TJP3	tight junction protein 3 (TJP3), mRNA.	4	1	5	0	0	0	0	1	1	4	2	6	0	0	0	0	0	0	0	0	0	0	6	2.18987	#N/A	TJP3
1082	NM_001045962	507213	PSMA6	proteasome 20S subunit alpha 6 (PSMA6), mRNA.	2	3	5	0	0	0	1	0	1	3	3	6	0	0	0	0	0	0	0	0	0	0	6	#N/A	#N/A	PSMA6
1113	NM_001046015	508853	IMMT	inner membrane mitochondrial protein (IMMT), mRNA.	2	0	2	0	0	0	0	4	4	2	4	6	0	0	0	0	0	0	0	0	0	0	6	#N/A	#N/A	#N/A
1126	NM_001046045	509966	OLA1	Obg like ATPase 1 (OLA1), mRNA.	2	1	3	0	0	0	2	1	3	4	2	6	0	0	0	0	0	0	0	0	0	0	6	#N/A	#N/A	#N/A
1130	NM_001046052	510330	DYNC1LI1	dynein cytoplasmic 1 light intermediate chain 1 (DYNC1LI1), mRNA.	1	5	6	0	0	0	0	0	0	1	5	6	0	0	0	0	0	0	0	0	0	0	6	#N/A	#N/A	#N/A
1133	NM_001046057	510551	ADH6	alcohol dehydrogenase 6 (class V) (ADH6), mRNA.	0	1	1	0	0	0	1	0	1	1	1	2	0	2	2	0	0	0	0	0	0	4	6	#N/A	#N/A	#N/A
1164	NM_001046127	512655	GPATCH11	G-patch domain containing 11 (GPATCH11), mRNA.	0	5	5	0	0	0	1	0	1	1	5	6	0	0	0	0	0	0	0	0	0	0	6	#N/A	#N/A	#N/A
1170	NM_001046141	513217	C8B	complement C8 beta chain (C8B), mRNA.	6	0	6	0	0	0	0	0	0	6	0	6	0	0	0	0	0	0	0	0	0	0	6	#N/A	#N/A	#N/A
1227	NM_001046270	523998	NEK2	NIMA related kinase 2 (NEK2), mRNA.	4	1	5	0	0	0	0	1	1	4	2	6	0	0	0	0	0	0	0	0	0	0	6	#N/A	#N/A	#N/A
1236	NM_001046290	528041	SHCBP1L	SHC binding and spindle associated 1 like (SHCBP1L), mRNA.	2	0	2	0	0	0	0	0	0	2	0	2	1	0	1	0	0	0	0	1	1	4	6	#N/A	#N/A	#N/A
1265	NM_001046343	533058	GATB	glutamyl-tRNA amidotransferase subunit B (GATB), mRNA; nuclear gene for mitochondrial product.	1	5	6	0	0	0	0	0	0	1	5	6	0	0	0	0	0	0	0	0	0	0	6	#N/A	#N/A	#N/A
1270	NM_001046352	533547	KLKB1	kallikrein B1 (KLKB1), mRNA.	1	1	2	0	0	0	0	0	0	1	1	2	0	2	2	0	0	0	0	0	0	4	6	#N/A	#N/A	#N/A
1293	NM_001046401	535290	MRPS28	mitochondrial ribosomal protein S28 (MRPS28), mRNA; nuclear gene for mitochondrial product.	1	5	6	0	0	0	0	0	0	1	5	6	0	0	0	0	0	0	0	0	0	0	6	#N/A	#N/A	#N/A
1302	NM_001046423	537539	ALDH9A1	aldehyde dehydrogenase 9 family member A1 (ALDH9A1), mRNA.	4	0	4	0	1	1	0	1	1	4	2	6	0	0	0	0	0	0	0	0	0	0	6	#N/A	#N/A	#N/A
1318	NM_001046468	540107	PACSIN2	protein kinase C and casein kinase substrate in neurons 2 (PACSIN2), mRNA.	3	2	5	0	0	0	0	1	1	3	3	6	0	0	0	0	0	0	0	0	0	0	6	#N/A	#N/A	#N/A
1337	NM_001046506	613433	SYNPR	synaptoporin (SYNPR), mRNA.	1	4	5	0	0	0	0	1	1	1	5	6	0	0	0	0	0	0	0	0	0	0	6	#N/A	#N/A	#N/A
1338	NM_001046509	613568	MACROD1	mono-ADP ribosylhydrolase 1 (MACROD1), mRNA.	4	2	6	0	0	0	0	0	0	4	2	6	0	0	0	0	0	0	0	0	0	0	6	#N/A	#N/A	#N/A
1420	NM_001075189	505106	USP14	ubiquitin specific peptidase 14 (USP14), mRNA.	1	3	4	0	0	0	1	1	2	2	4	6	0	0	0	0	0	0	0	0	0	0	6	#N/A	#N/A	#N/A
1472	NM_001075296	507008	LRSAM1	leucine rich repeat and sterile alpha motif containing 1 (LRSAM1), mRNA.	5	0	5	0	0	0	0	1	1	5	1	6	0	0	0	0	0	0	0	0	0	0	6	#N/A	#N/A	#N/A
1476	NM_001075309	507389	GPM6A	glycoprotein M6A (GPM6A), mRNA.	5	1	6	0	0	0	0	0	0	5	1	6	0	0	0	0	0	0	0	0	0	0	6	#N/A	#N/A	#N/A
1478	NM_001075315	507460	TBRG1	transforming growth factor beta regulator 1 (TBRG1), mRNA.	3	0	3	0	0	0	0	1	1	3	1	4	0	0	0	0	1	1	0	0	0	2	6	#N/A	#N/A	#N/A
1498	NM_001075352	508345	APIP	APAF1 interacting protein (APIP), mRNA.	1	5	6	0	0	0	0	0	0	1	5	6	0	0	0	0	0	0	0	0	0	0	6	#N/A	#N/A	#N/A
1518	NM_001075401	509282	HDDC2	HD domain containing 2 (HDDC2), mRNA.	6	0	6	0	0	0	0	0	0	6	0	6	0	0	0	0	0	0	0	0	0	0	6	#N/A	#N/A	#N/A
1532	NM_001075426	509971	ANGPTL1	angiopoietin like 1 (ANGPTL1), mRNA.	3	0	3	1	0	1	1	1	2	5	1	6	0	0	0	0	0	0	0	0	0	0	6	#N/A	#N/A	#N/A
1543	NM_001075448	510420	MYBL2	MYB proto-oncogene like 2 (MYBL2), mRNA.	4	0	4	0	0	0	0	2	2	4	2	6	0	0	0	0	0	0	0	0	0	0	6	#N/A	#N/A	#N/A
1611	NM_001075611	513303	TOM1L1	target of myb1 like 1 membrane trafficking protein (TOM1L1), mRNA.	1	1	2	0	0	0	3	1	4	4	2	6	0	0	0	0	0	0	0	0	0	0	6	2.94593	#N/A	#N/A
1612	NM_001075612	513316	KCNIP3	potassium voltage-gated channel interacting protein 3 (KCNIP3), mRNA.	2	4	6	0	0	0	0	0	0	2	4	6	0	0	0	0	0	0	0	0	0	0	6	#N/A	#N/A	#N/A
1628	NM_001075641	513986	MTMR7	myotubularin related protein 7 (MTMR7), mRNA.	5	1	6	0	0	0	0	0	0	5	1	6	0	0	0	0	0	0	0	0	0	0	6	#N/A	#N/A	#N/A
1652	NM_001075692	515016	MTUS1	microtubule associated scaffold protein 1 (MTUS1), mRNA.	1	5	6	0	0	0	0	0	0	1	5	6	0	0	0	0	0	0	0	0	0	0	6	#N/A	#N/A	#N/A
1674	NM_001075753	517489	INTS12	integrator complex subunit 12 (INTS12), mRNA.	4	2	6	0	0	0	0	0	0	4	2	6	0	0	0	0	0	0	0	0	0	0	6	#N/A	#N/A	#N/A
1690	NM_001075785	519328	SIRT4	sirtuin 4 (SIRT4), mRNA; nuclear gene for mitochondrial product.	1	2	3	0	0	0	1	0	1	2	2	4	0	1	1	0	0	0	0	0	0	2	6	#N/A	#N/A	#N/A
1698	NM_001075800	520143	EAPP	E2F associated phosphoprotein (EAPP), mRNA.	1	1	2	0	0	0	0	0	0	1	1	2	0	2	2	0	0	0	0	0	0	4	6	#N/A	#N/A	#N/A
1713	NM_001075826	522103	STK39	serine/threonine kinase 39 (STK39), mRNA.	1	0	1	0	0	0	2	3	5	3	3	6	0	0	0	0	0	0	0	0	0	0	6	#N/A	#N/A	#N/A
1730	NM_001075851	523902	VRK2	VRK serine/threonine kinase 2 (VRK2), mRNA.	5	1	6	0	0	0	0	0	0	5	1	6	0	0	0	0	0	0	0	0	0	0	6	#N/A	#N/A	#N/A
1740	NM_001075869	525332	SBSPON	somatomedin B and thrombospondin type 1 domain containing (SBSPON), mRNA.	1	5	6	0	0	0	0	0	0	1	5	6	0	0	0	0	0	0	0	0	0	0	6	#N/A	#N/A	SBSPON
1743	NM_001075874	525521	RPUSD1	RNA pseudouridine synthase domain containing 1 (RPUSD1), mRNA.	2	2	4	0	0	0	0	0	0	2	2	4	1	0	1	0	0	0	0	0	0	2	6	#N/A	#N/A	#N/A
1789	NM_001075970	532644	KRT71	keratin 71 (KRT71), mRNA.	3	0	3	0	0	0	0	1	1	3	1	4	0	0	0	0	0	0	0	1	1	2	6	#N/A	#N/A	#N/A
1819	NM_001076021	534377	SERGEF	secretion regulating guanine nucleotide exchange factor (SERGEF), mRNA.	3	2	5	0	0	0	1	0	1	4	2	6	0	0	0	0	0	0	0	0	0	0	6	#N/A	#N/A	#N/A
1870	NM_001076104	538474	NFIB	nuclear factor I B (NFIB), mRNA.	1	1	2	0	0	0	3	1	4	4	2	6	0	0	0	0	0	0	0	0	0	0	6	3.6333	#N/A	NFIB
1879	NM_001076119	538668	TSPAN5	tetraspanin 5 (TSPAN5), mRNA.	1	4	5	0	0	0	1	0	1	2	4	6	0	0	0	0	0	0	0	0	0	0	6	#N/A	#N/A	#N/A
1925	NM_001076223	540488	SMAD1	SMAD family member 1 (SMAD1), mRNA.	5	1	6	0	0	0	0	0	0	5	1	6	0	0	0	0	0	0	0	0	0	0	6	2.55192	#N/A	SMAD1
1927	NM_001076229	540583	RAB30	RAB30, member RAS oncogene family (RAB30), mRNA.	0	5	5	0	1	1	0	0	0	0	6	6	0	0	0	0	0	0	0	0	0	0	6	#N/A	#N/A	#N/A
1929	NM_001076231	540666	HDAC8	histone deacetylase 8 (HDAC8), mRNA.	1	0	1	0	0	0	1	4	5	2	4	6	0	0	0	0	0	0	0	0	0	0	6	#N/A	#N/A	#N/A
1975	NM_001076311	614112	SNX24	sorting nexin 24 (SNX24), mRNA.	2	3	5	0	0	0	0	1	1	2	4	6	0	0	0	0	0	0	0	0	0	0	6	-1.86145	#N/A	#N/A
1976	NM_001076312	614118	TSEN15	tRNA splicing endonuclease subunit 15 (TSEN15), mRNA.	3	2	5	0	0	0	0	1	1	3	3	6	0	0	0	0	0	0	0	0	0	0	6	#N/A	#N/A	#N/A
1983	NM_001076328	614471	UBE2G2	ubiquitin conjugating enzyme E2 G2 (UBE2G2), mRNA.	0	2	2	2	0	2	2	0	2	4	2	6	0	0	0	0	0	0	0	0	0	0	6	#N/A	#N/A	#N/A
1998	NM_001076350	614841	FAM174B	family with sequence similarity 174 member B (FAM174B), mRNA.	0	2	2	0	0	0	0	0	0	0	2	2	2	0	2	0	0	0	0	0	0	4	6	#N/A	#N/A	#N/A
2002	NM_001076356	614972	NIPSNAP1	nipsnap homolog 1 (NIPSNAP1), mRNA.	5	0	5	0	0	0	0	1	1	5	1	6	0	0	0	0	0	0	0	0	0	0	6	#N/A	#N/A	NIPSNAP1
2007	NM_001076366	615342	BNIP3	BCL2 interacting protein 3 (BNIP3), mRNA.	1	1	2	0	0	0	0	0	0	1	1	2	1	1	2	0	0	0	0	0	0	4	6	-1.28401	#N/A	#N/A
2039	NM_001076440	616974	SPA17	sperm autoantigenic protein 17 (SPA17), mRNA.	2	0	2	0	0	0	0	0	0	2	0	2	0	1	1	0	0	0	0	1	1	4	6	#N/A	#N/A	SPA17
2085	NM_001076536	767614	MYBPC3	myosin binding protein C3 (MYBPC3), mRNA.	0	6	6	0	0	0	0	0	0	0	6	6	0	0	0	0	0	0	0	0	0	0	6	#N/A	#N/A	#N/A
2145	NM_001076871	524334	L3MBTL3	L3MBTL histone methyl-lysine binding protein 3 (L3MBTL3), mRNA.	0	3	3	1	2	3	0	0	0	1	5	6	0	0	0	0	0	0	0	0	0	0	6	#N/A	#N/A	#N/A
2146	NM_001076872	524528	NUP133	nucleoporin 133 (NUP133), mRNA.	3	0	3	0	0	0	0	3	3	3	3	6	0	0	0	0	0	0	0	0	0	0	6	#N/A	#N/A	#N/A
2148	NM_001076874	525116	RUNDC3B	RUN domain containing 3B (RUNDC3B), mRNA.	0	1	1	0	0	0	4	1	5	4	2	6	0	0	0	0	0	0	0	0	0	0	6	4.17334	#N/A	RUNDC3B
2196	NM_001076945	617419	SCD5	stearoyl-CoA desaturase 5 (SCD5), mRNA.	0	1	1	1	1	2	0	3	3	1	5	6	0	0	0	0	0	0	0	0	0	0	6	#N/A	#N/A	SCD5
2197	NM_001076949	618235	SEPTIN3	septin 3 (SEPTIN3), mRNA.	5	1	6	0	0	0	0	0	0	5	1	6	0	0	0	0	0	0	0	0	0	0	6	#N/A	#N/A	#N/A
2228	NM_001077009	767936	P2RY14	purinergic receptor P2Y14 (P2RY14), mRNA.	0	5	5	0	0	0	1	0	1	1	5	6	0	0	0	0	0	0	0	0	0	0	6	2.31005	#N/A	#N/A
2304	NM_001077840	408016	CASP3	caspase 3 (CASP3), mRNA.	3	0	3	0	0	0	1	0	1	4	0	4	0	1	1	0	0	0	0	0	0	2	6	#N/A	#N/A	#N/A
2323	NM_001077880	508700	PIGK	phosphatidylinositol glycan anchor biosynthesis class K (PIGK), mRNA.	2	4	6	0	0	0	0	0	0	2	4	6	0	0	0	0	0	0	0	0	0	0	6	#N/A	#N/A	#N/A
2338	NM_001077915	513086	CCDC102A	coiled-coil domain containing 102A (CCDC102A), mRNA.	4	0	4	0	1	1	0	1	1	4	2	6	0	0	0	0	0	0	0	0	0	0	6	#N/A	#N/A	#N/A
2362	NM_001077964	525335	GLS	glutaminase (GLS), mRNA; nuclear gene for mitochondrial product.	0	0	0	1	0	1	5	0	5	6	0	6	0	0	0	0	0	0	0	0	0	0	6	#N/A	#N/A	#N/A
2384	NM_001077992	533046	SLC7A14	solute carrier family 7 member 14 (SLC7A14), mRNA.	3	3	6	0	0	0	0	0	0	3	3	6	0	0	0	0	0	0	0	0	0	0	6	#N/A	#N/A	#N/A
2390	NM_001078000	534400	CEP120	centrosomal protein 120 (CEP120), mRNA.	2	2	4	0	0	0	0	2	2	2	4	6	0	0	0	0	0	0	0	0	0	0	6	#N/A	#N/A	#N/A
2402	NM_001078022	539491	GJA5	gap junction protein alpha 5 (GJA5), mRNA.	0	4	4	0	0	0	0	0	0	0	4	4	0	1	1	0	0	0	0	0	0	2	6	#N/A	#N/A	#N/A
2442	NM_001078109	768234	CSNK1E	casein kinase 1, epsilon (CSNK1E), mRNA.	5	1	6	0	0	0	0	0	0	5	1	6	0	0	0	0	0	0	0	0	0	0	6	#N/A	#N/A	#N/A
2490	NM_001079615	540486	TIPRL	TOR signaling pathway regulator (TIPRL), mRNA.	2	2	4	0	0	0	2	0	2	4	2	6	0	0	0	0	0	0	0	0	0	0	6	#N/A	#N/A	TIPRL
2507	NM_001079771	508379	SMOC1	SPARC related modular calcium binding 1 (SMOC1), mRNA.	2	4	6	0	0	0	0	0	0	2	4	6	0	0	0	0	0	0	0	0	0	0	6	#N/A	#N/A	#N/A
2526	NM_001080226	505159	FDX2	ferredoxin 2 (FDX2), mRNA; nuclear gene for mitochondrial product.	2	0	2	0	0	0	0	0	0	2	0	2	0	0	0	0	0	0	0	2	2	4	6	#N/A	#N/A	#N/A
2534	NM_001080237	507393	PEX14	peroxisomal biogenesis factor 14 (PEX14), mRNA.	4	0	4	0	0	0	0	2	2	4	2	6	0	0	0	0	0	0	0	0	0	0	6	#N/A	#N/A	#N/A
2554	NM_001080272	514720	OSMR	oncostatin M receptor (OSMR), mRNA.	1	5	6	0	0	0	0	0	0	1	5	6	0	0	0	0	0	0	0	0	0	0	6	1.87473	#N/A	#N/A
2563	NM_001080288	526291	SLC13A3	solute carrier family 13 member 3 (SLC13A3), mRNA.	1	4	5	0	0	0	1	0	1	2	4	6	0	0	0	0	0	0	0	0	0	0	6	#N/A	#N/A	#N/A
2565	NM_001080293	532663	ENPP2	ectonucleotide pyrophosphatase/phosphodiesterase 2 (ENPP2), mRNA.	2	3	5	0	0	0	1	0	1	3	3	6	0	0	0	0	0	0	0	0	0	0	6	#N/A	#N/A	#N/A
2568	NM_001080297	533720	SWAP70	switching B cell complex subunit SWAP70 (SWAP70), mRNA.	1	5	6	0	0	0	0	0	0	1	5	6	0	0	0	0	0	0	0	0	0	0	6	#N/A	#N/A	#N/A
2619	NM_001080919	783020	SULT1C4	sulfotransferase family, cytosolic, 1C, member 4 (SULT1C4), mRNA.	3	1	4	0	0	0	0	0	0	3	1	4	1	0	1	0	0	0	0	0	0	2	6	#N/A	#N/A	#N/A
2648	NM_001081590	515798	CORO1C	coronin 1C (CORO1C), mRNA.	3	2	5	0	0	0	1	0	1	4	2	6	0	0	0	0	0	0	0	0	0	0	6	#N/A	#N/A	#N/A
2650	NM_001081593	525698	HPF1	histone PARylation factor 1 (HPF1), mRNA.	0	6	6	0	0	0	0	0	0	0	6	6	0	0	0	0	0	0	0	0	0	0	6	#N/A	#N/A	#N/A
2708	NM_001082447	535746	SEPTIN11	septin 11 (SEPTIN11), mRNA.	2	0	2	1	0	1	1	2	3	4	2	6	0	0	0	0	0	0	0	0	0	0	6	#N/A	#N/A	#N/A
2749	NM_001083395	508663	ZNF277	zinc finger protein 277 (ZNF277), mRNA.	1	2	3	1	1	2	1	0	1	3	3	6	0	0	0	0	0	0	0	0	0	0	6	#N/A	#N/A	#N/A
2781	NM_001083458	531241	ADAM23	ADAM metallopeptidase domain 23 (ADAM23), mRNA.	0	0	0	0	1	1	0	5	5	0	6	6	0	0	0	0	0	0	0	0	0	0	6	#N/A	#N/A	#N/A
2784	NM_001083466	533197	HNRNPUL1	heterogeneous nuclear ribonucleoprotein U like 1 (HNRNPUL1), mRNA.	0	5	5	0	0	0	1	0	1	1	5	6	0	0	0	0	0	0	0	0	0	0	6	#N/A	#N/A	#N/A
2787	NM_001083469	533681	TMEM156	transmembrane protein 156 (TMEM156), mRNA.	0	5	5	0	0	0	1	0	1	1	5	6	0	0	0	0	0	0	0	0	0	0	6	#N/A	#N/A	#N/A
2799	NM_001083487	538021	DAGLB	diacylglycerol lipase beta (DAGLB), mRNA.	2	3	5	0	0	0	0	1	1	2	4	6	0	0	0	0	0	0	0	0	0	0	6	2.56673	#N/A	#N/A
2806	NM_001083502	613328	ZNF385B	zinc finger protein 385B (ZNF385B), mRNA.	0	4	4	0	0	0	0	0	0	0	4	4	1	0	1	0	0	0	0	0	0	2	6	#N/A	#N/A	#N/A
2832	NM_001083662	510635	MFSD14B	major facilitator superfamily domain containing 14B (MFSD14B), mRNA.	4	1	5	0	0	0	0	1	1	4	2	6	0	0	0	0	0	0	0	0	0	0	6	-1.35797	#N/A	#N/A
2833	NM_001083663	510924	HERC3	HECT and RLD domain containing E3 ubiquitin protein ligase 3 (HERC3), mRNA.	3	3	6	0	0	0	0	0	0	3	3	6	0	0	0	0	0	0	0	0	0	0	6	#N/A	#N/A	#N/A
2835	NM_001083670	511775	NSUN6	NOP2/Sun RNA methyltransferase 6 (NSUN6), mRNA.	3	3	6	0	0	0	0	0	0	3	3	6	0	0	0	0	0	0	0	0	0	0	6	#N/A	#N/A	#N/A
2848	NM_001083695	516522	FRRS1	ferric chelate reductase 1 (FRRS1), mRNA.	4	2	6	0	0	0	0	0	0	4	2	6	0	0	0	0	0	0	0	0	0	0	6	#N/A	#N/A	#N/A
2864	NM_001083729	537784	PKP2	plakophilin 2 (PKP2), mRNA.	0	5	5	0	0	0	1	0	1	1	5	6	0	0	0	0	0	0	0	0	0	0	6	2.39587	#N/A	#N/A
2868	NM_001083736	538846	JAM2	junctional adhesion molecule 2 (JAM2), mRNA.	0	6	6	0	0	0	0	0	0	0	6	6	0	0	0	0	0	0	0	0	0	0	6	#N/A	#N/A	#N/A
2874	NM_001083749	540247	CMTM4	CKLF like MARVEL transmembrane domain containing 4 (CMTM4), mRNA.	4	2	6	0	0	0	0	0	0	4	2	6	0	0	0	0	0	0	0	0	0	0	6	#N/A	#N/A	#N/A
2881	NM_001083757	613448	AK5	adenylate kinase 5 (AK5), mRNA.	4	2	6	0	0	0	0	0	0	4	2	6	0	0	0	0	0	0	0	0	0	0	6	#N/A	#N/A	#N/A
2889	NM_001083770	614962	STUM	stum, mechanosensory transduction mediator homolog (STUM), mRNA.	3	2	5	1	0	1	0	0	0	4	2	6	0	0	0	0	0	0	0	0	0	0	6	#N/A	#N/A	#N/A
2890	NM_001083772	615514	LOC615514	glutathione S-transferase mu 1-like (LOC615514), mRNA.	0	4	4	0	0	0	2	0	2	2	4	6	0	0	0	0	0	0	0	0	0	0	6	#N/A	#N/A	#N/A
2967	NM_001098074	533297	YBX3	Y-box binding protein 3 (YBX3), mRNA.	0	4	4	0	0	0	0	0	0	0	4	4	1	0	1	0	0	0	0	0	0	2	6	2.14935	#N/A	#N/A
3030	NM_001098468	616839	CCDC93	coiled-coil domain containing 93 (CCDC93), mRNA.	0	0	0	0	0	0	1	3	4	1	3	4	0	0	0	0	0	0	0	1	1	2	6	#N/A	#N/A	#N/A
3114	NM_001099021	523291	SCTR	secretin receptor (SCTR), mRNA.	3	0	3	0	2	2	0	1	1	3	3	6	0	0	0	0	0	0	0	0	0	0	6	#N/A	#N/A	#N/A
3178	NM_001099122	613423	UBE2W	ubiquitin conjugating enzyme E2 W (UBE2W), mRNA.	3	2	5	0	0	0	0	1	1	3	3	6	0	0	0	0	0	0	0	0	0	0	6	1.11447	#N/A	#N/A
3194	NM_001099154	616315	TOM1L2	target of myb1 like 2 membrane trafficking protein (TOM1L2), mRNA.	4	0	4	0	1	1	0	1	1	4	2	6	0	0	0	0	0	0	0	0	0	0	6	#N/A	#N/A	#N/A
3216	NM_001099213	790244	TMEM170A	transmembrane protein 170A (TMEM170A), mRNA.	2	3	5	0	1	1	0	0	0	2	4	6	0	0	0	0	0	0	0	0	0	0	6	#N/A	#N/A	TMEM170A
3310	NM_001100387	521721	LRRC20	leucine rich repeat containing 20 (LRRC20), mRNA.	3	2	5	0	1	1	0	0	0	3	3	6	0	0	0	0	0	0	0	0	0	0	6	#N/A	#N/A	#N/A
3360	NM_001101144	532978	DHX32	DEAH-box helicase 32 (putative) (DHX32), mRNA.	3	3	6	0	0	0	0	0	0	3	3	6	0	0	0	0	0	0	0	0	0	0	6	#N/A	#N/A	#N/A
3396	NM_001101201	540085	GAB1	GRB2 associated binding protein 1 (GAB1), mRNA.	2	3	5	0	0	0	0	1	1	2	4	6	0	0	0	0	0	0	0	0	0	0	6	#N/A	#N/A	#N/A
3419	NM_001101256	616371	LURAP1L	leucine rich adaptor protein 1 like (LURAP1L), mRNA.	4	1	5	0	0	0	0	1	1	4	2	6	0	0	0	0	0	0	0	0	0	0	6	#N/A	#N/A	#N/A
3445	NM_001101310	790875	GSK3B	glycogen synthase kinase 3 beta (GSK3B), mRNA.	0	0	0	0	0	0	1	5	6	1	5	6	0	0	0	0	0	0	0	0	0	0	6	#N/A	#N/A	#N/A
3482	NM_001101894	508172	FBXO11	F-box protein 11 (FBXO11), mRNA.	1	5	6	0	0	0	0	0	0	1	5	6	0	0	0	0	0	0	0	0	0	0	6	1.12274	#N/A	FBXO11
3517	NM_001101976	513554	SOAT2	sterol O-acyltransferase 2 (SOAT2), mRNA.	5	1	6	0	0	0	0	0	0	5	1	6	0	0	0	0	0	0	0	0	0	0	6	#N/A	#N/A	#N/A
3532	NM_001102000	514525	CBS	cystathionine beta-synthase (CBS), mRNA.	3	0	3	0	1	1	1	1	2	4	2	6	0	0	0	0	0	0	0	0	0	0	6	#N/A	#N/A	#N/A
3559	NM_001102046	517861	POU6F2	POU class 6 homeobox 2 (POU6F2), mRNA.	2	4	6	0	0	0	0	0	0	2	4	6	0	0	0	0	0	0	0	0	0	0	6	#N/A	#N/A	#N/A
3560	NM_001102048	518623	LOC518623	glycine-N-acyltransferase-like (LOC518623), mRNA.	1	4	5	0	0	0	1	0	1	2	4	6	0	0	0	0	0	0	0	0	0	0	6	#N/A	#N/A	#N/A
3565	NM_001102054	519219	SERPINI2	serpin family I member 2 (SERPINI2), mRNA.	0	3	3	0	0	0	2	1	3	2	4	6	0	0	0	0	0	0	0	0	0	0	6	#N/A	#N/A	#N/A
3566	NM_001102055	519444	CADPS2	calcium dependent secretion activator 2 (CADPS2), mRNA.	2	4	6	0	0	0	0	0	0	2	4	6	0	0	0	0	0	0	0	0	0	0	6	3.15324	#N/A	#N/A
3652	NM_001102182	535197	MARK2	microtubule affinity regulating kinase 2 (MARK2), mRNA.	1	5	6	0	0	0	0	0	0	1	5	6	0	0	0	0	0	0	0	0	0	0	6	#N/A	#N/A	#N/A
3660	NM_001102199	537282	MYO1B	myosin IB (MYO1B), mRNA.	0	3	3	0	0	0	2	1	3	2	4	6	0	0	0	0	0	0	0	0	0	0	6	-3.56434	#N/A	#N/A
3684	NM_001102241	540393	ARHGAP12	Rho GTPase activating protein 12 (ARHGAP12), mRNA.	6	0	6	0	0	0	0	0	0	6	0	6	0	0	0	0	0	0	0	0	0	0	6	#N/A	#N/A	#N/A
3768	NM_001102493	511433	DLC1	DLC1 Rho GTPase activating protein (DLC1), mRNA.	3	3	6	0	0	0	0	0	0	3	3	6	0	0	0	0	0	0	0	0	0	0	6	-2.38682	#N/A	#N/A
3786	NM_001102516	534787	ITIH5	inter-alpha-trypsin inhibitor heavy chain 5 (ITIH5), mRNA.	3	3	6	0	0	0	0	0	0	3	3	6	0	0	0	0	0	0	0	0	0	0	6	#N/A	#N/A	#N/A
3800	NM_001102542	100124498	XPO7	exportin 7 (XPO7), mRNA.	1	3	4	0	0	0	1	1	2	2	4	6	0	0	0	0	0	0	0	0	0	0	6	#N/A	#N/A	#N/A
3807	NM_001102554	100124520	GNAL	G protein subunit alpha L (GNAL), mRNA.	0	6	6	0	0	0	0	0	0	0	6	6	0	0	0	0	0	0	0	0	0	0	6	#N/A	#N/A	#N/A
3831	NM_001103237	510498	SBF2	SET binding factor 2 (SBF2), mRNA.	4	2	6	0	0	0	0	0	0	4	2	6	0	0	0	0	0	0	0	0	0	0	6	#N/A	#N/A	#N/A
3832	NM_001103242	512243	ZSWIM1	zinc finger SWIM-type containing 1 (ZSWIM1), mRNA.	0	2	2	0	0	0	0	0	0	0	2	2	0	1	1	0	0	0	1	0	1	4	6	#N/A	#N/A	#N/A
3834	NM_001103244	513600	RAD17	RAD17 checkpoint clamp loader component (RAD17), mRNA.	1	4	5	0	0	0	1	0	1	2	4	6	0	0	0	0	0	0	0	0	0	0	6	#N/A	#N/A	#N/A
3885	NM_001103341	100125308	KCTD5	potassium channel tetramerization domain containing 5 (KCTD5), mRNA.	1	5	6	0	0	0	0	0	0	1	5	6	0	0	0	0	0	0	0	0	0	0	6	#N/A	#N/A	#N/A
3889	NM_001103345	100125313	BTNL9	butyrophilin like 9 (BTNL9), mRNA.	0	2	2	0	0	0	2	2	4	2	4	6	0	0	0	0	0	0	0	0	0	0	6	#N/A	#N/A	#N/A
3937	NM_001105043	100125760	DPP7	dipeptidyl peptidase 7 (DPP7), mRNA.	0	2	2	0	0	0	0	0	0	0	2	2	2	0	2	0	0	0	0	0	0	4	6	-2.47929	#N/A	#N/A
3965	NM_001105364	513412	JAM3	junctional adhesion molecule 3 (JAM3), mRNA.	0	4	4	0	0	0	0	0	0	0	4	4	1	0	1	0	0	0	0	0	0	2	6	#N/A	#N/A	#N/A
3979	NM_001105392	523858	KCTD19	potassium channel tetramerization domain containing 19 (KCTD19), mRNA.	3	3	6	0	0	0	0	0	0	3	3	6	0	0	0	0	0	0	0	0	0	0	6	#N/A	#N/A	#N/A
3980	NM_001105396	526059	ABCD3	ATP binding cassette subfamily D member 3 (ABCD3), mRNA.	4	1	5	1	0	1	0	0	0	5	1	6	0	0	0	0	0	0	0	0	0	0	6	-1.87822	#N/A	#N/A
4037	NM_001105626	533184	TTYH2	tweety family member 2 (TTYH2), mRNA.	0	6	6	0	0	0	0	0	0	0	6	6	0	0	0	0	0	0	0	0	0	0	6	-2.50039	#N/A	#N/A
4065	NM_001109963	100126170	PHRF1	PHD and ring finger domains 1 (PHRF1), mRNA.	2	2	4	0	0	0	0	0	0	2	2	4	0	0	0	0	0	0	1	0	1	2	6	#N/A	#N/A	#N/A
4069	NM_001109982	516262	GNAT3	G protein subunit alpha transducin 3 (GNAT3), mRNA.	0	2	2	0	0	0	0	0	0	0	2	2	0	2	2	0	0	0	0	0	0	4	6	#N/A	#N/A	#N/A
4196	NM_001142967	787967	ATG7	autophagy related 7 (ATG7), transcript variant 1, mRNA.	1	1	2	0	0	0	0	4	4	1	5	6	0	0	0	0	0	0	0	0	0	0	6	#N/A	#N/A	#N/A
4203	NM_001143772	510512	ZNF438	zinc finger protein 438 (ZNF438), mRNA.	4	2	6	0	0	0	0	0	0	4	2	6	0	0	0	0	0	0	0	0	0	0	6	#N/A	#N/A	#N/A
4238	NM_001144109	539718	SCN2A	sodium voltage-gated channel alpha subunit 2 (SCN2A), mRNA.	2	3	5	0	0	0	0	1	1	2	4	6	0	0	0	0	0	0	0	0	0	0	6	#N/A	#N/A	#N/A
4247	NM_001145865	506240	PRIM1	DNA primase subunit 1 (PRIM1), mRNA.	2	2	4	0	0	0	0	0	0	2	2	4	0	0	0	0	0	0	0	1	1	2	6	#N/A	#N/A	#N/A
4331	NM_001166616	512045	C5	complement C5 (C5), mRNA.	4	2	6	0	0	0	0	0	0	4	2	6	0	0	0	0	0	0	0	0	0	0	6	#N/A	#N/A	#N/A
4353	NM_001178103	281129	DSC3	desmocollin 3 (DSC3), mRNA.	5	0	5	0	0	0	0	1	1	5	1	6	0	0	0	0	0	0	0	0	0	0	6	#N/A	#N/A	#N/A
4371	NM_001191139	407140	ADRA1B	adrenoceptor alpha 1B (ADRA1B), mRNA.	0	2	2	0	0	0	4	0	4	4	2	6	0	0	0	0	0	0	0	0	0	0	6	#N/A	#N/A	ADRA1B
4377	NM_001191152	780855	PPIP5K2	diphosphoinositol pentakisphosphate kinase 2 (PPIP5K2), mRNA.	5	0	5	0	0	0	1	0	1	6	0	6	0	0	0	0	0	0	0	0	0	0	6	#N/A	#N/A	#N/A
4390	NM_001191172	504632	CNNM2	cyclin and CBS domain divalent metal cation transport mediator 2 (CNNM2), mRNA.	2	2	4	0	0	0	0	2	2	2	4	6	0	0	0	0	0	0	0	0	0	0	6	#N/A	#N/A	#N/A
4397	NM_001191184	540416	KCND2	potassium voltage-gated channel subfamily D member 2 (KCND2), mRNA.	5	1	6	0	0	0	0	0	0	5	1	6	0	0	0	0	0	0	0	0	0	0	6	#N/A	#N/A	#N/A
4501	NM_001191398	504357	AXIN1	axin 1 (AXIN1), mRNA.	6	0	6	0	0	0	0	0	0	6	0	6	0	0	0	0	0	0	0	0	0	0	6	#N/A	#N/A	#N/A
4513	NM_001191427	504257	SCOC	short coiled-coil protein (SCOC), mRNA.	0	3	3	0	0	0	0	1	1	0	4	4	0	1	1	0	0	0	0	0	0	2	6	#N/A	#N/A	#N/A
4522	NM_001191445	515657	HEATR6	HEAT repeat containing 6 (HEATR6), mRNA.	1	0	1	0	0	0	0	5	5	1	5	6	0	0	0	0	0	0	0	0	0	0	6	#N/A	#N/A	#N/A
4546	NM_001191492	523441	CLASP1	cytoplasmic linker associated protein 1 (CLASP1), mRNA.	3	1	4	0	1	1	1	0	1	4	2	6	0	0	0	0	0	0	0	0	0	0	6	#N/A	#N/A	#N/A
4555	NM_001191507	537782	APAF1	apoptotic peptidase activating factor 1 (APAF1), mRNA.	2	3	5	0	0	0	0	1	1	2	4	6	0	0	0	0	0	0	0	0	0	0	6	#N/A	#N/A	#N/A
4590	NM_001192048	505123	CHD1	chromodomain helicase DNA binding protein 1 (CHD1), mRNA.	1	5	6	0	0	0	0	0	0	1	5	6	0	0	0	0	0	0	0	0	0	0	6	1.46539	#N/A	#N/A
4621	NM_001192108	538844	LRRC7	leucine rich repeat containing 7 (LRRC7), mRNA.	3	3	6	0	0	0	0	0	0	3	3	6	0	0	0	0	0	0	0	0	0	0	6	#N/A	#N/A	#N/A
[truncated: 5,115 more rows]

## Sheet: gene_DMR
DMR overlapped with genes
seqnames	start	end	gene.id	DM_status	pvalue	qvalue	meth.diff	chr	gene_start	gene_end	gene_length	strand	DMCs	Gene ID	gene symbol	gene names		Gene symbol
chr1	29360001	29361000	genes:12295	hypo	8.46731e-33	3.00742e-29	-29.4529	chr1	29107841	29418737	310897	-	5	615745	NM_001122729	Bos taurus	1,4-alpha-glucan branching enzyme 1	GBE1
chr1	116798001	116799000	genes:10531	hypo	7.5428e-17	3.31847e-14	-23.8892	chr1	116654940	117015878	360939	-	6	538979	NM_001206505	Bos taurus	mediator complex subunit 12L	MED12L
chr1	116798001	116799000	genes:13755	hypo	7.5428e-17	3.31847e-14	-23.8892	chr1	116781560	116798062	16503	+	6	785030	NM_001205451	Bos taurus	G protein-coupled receptor 87	GPR87
chr1	116801001	116802000	genes:10531	hypo	3.79567e-11	4.79144e-09	-22.5933	chr1	116654940	117015878	360939	-	3	538979	NM_001206505	Bos taurus	mediator complex subunit 12L	MED12L
chr1	127051001	127052000	genes:9206	hyper	5.50744e-11	6.65683e-09	21.0698	chr1	127050091	127086255	36165	-	3	532844	NM_001035393	Bos taurus	ATPase Na+/K+ transporting subunit beta 3	ATP1B3
chr1	128926001	128927000	genes:8965	hypo	4.96741e-28	1.05142e-24	-28.4136	chr1	128385395	129107871	722477	-	3	530999	NM_001206757	Bos taurus	calsyntenin 2	CLSTN2
chr1	141682001	141683000	genes:1473	hypo	1.09849e-19	7.73529e-17	-33.1472	chr1	141674289	141706499	32211	+	4	280872	NM_173940	Bos taurus	MX dynamin like GTPase 1	MX1
chr2	103998001	103999000	genes:11594	hypo	3.95387e-37	2.02739e-33	-27.9383	chr2	103970394	104038722	68329	-	3	613445	NM_001192953	Bos taurus	melanoregulin	MREG
chr3	1652001	1653000	genes:14	hypo	4.9057e-16	1.86135e-13	-23.9009	chr3	1606162	1673362	67201	-	4	100124500	NM_001102543	Bos taurus	serine/threonine/tyrosine interacting like 2	STYXL2
chr3	1682001	1683000	genes:7588	hypo	3.98238e-14	1.01493e-11	-20.5042	chr3	1675938	1728606	52669	+	4	518646	NM_001035330	Bos taurus	glycoprotein A33	GPA33
chr3	34613001	34614000	genes:6049	hypo	1.25774e-28	2.89805e-25	-21.7273	chr3	34568241	34622300	54060	-	4	512490	NM_001083415	Bos taurus	syntaxin binding protein 3	STXBP3
chr4	10451001	10452000	genes:6604	hyper	3.15528e-23	3.78487e-20	21.2803	chr4	10449812	10468917	19106	-	3	514205	NM_001205781	Bos taurus	sterile alpha motif domain containing 9	SAMD9
chr4	23616001	23617000	genes:11667	hypo	1.51124e-15	5.19774e-13	-26.9954	chr4	23557610	23947041	389432	-	4	613658	NM_001192973	Bos taurus	alkylglycerol monooxygenase	AGMO
chr4	46079001	46080000	genes:7768	hyper	6.69474e-42	4.68709e-38	27.4233	chr4	45537951	46116811	578861	+	10	520147	NM_001104984	Bos taurus	LHFPL tetraspan subfamily member 3	LHFPL3
chr4	68030001	68031000	genes:12566	hyper	1.69223e-15	5.77388e-13	21.6369	chr4	67992971	68321145	328175	+	3	616701	NM_001206257	Bos taurus	JAZF zinc finger 1	JAZF1
chr5	9459001	9460000	genes:10371	hyper	2.60192e-27	5.2047e-24	24.8529	chr5	9316982	9477561	160580	-	3	538606	NM_001102217	Bos taurus	protein phosphatase 1 regulatory subunit 12A	PPP1R12A
chr5	32387001	32388000	genes:9418	hypo	4.13495e-19	2.64797e-16	-24.2285	chr5	32382453	32438249	55797	+	4	533656	NM_001167932	Bos taurus	vitamin D receptor	VDR
chr5	68578001	68579000	genes:7365	hypo	3.72024e-23	4.44791e-20	-20.1659	chr5	68542281	68603070	60790	-	5	516864	NM_001191391	Bos taurus	aldehyde dehydrogenase 1 family member L2	ALDH1L2
chr5	114832001	114833000	genes:12464	hypo	2.22426e-62	4.62723e-58	-24.8239	chr5	114752957	114868297	115341	+	5	616294	NM_001102299	Bos taurus	parvin beta	PARVB
chr5	116108001	116109000	genes:13277	hyper	2.11909e-59	3.95628e-55	22.6333	chr5	116028707	116169395	140689	+	6	767990	NM_001077051	Bos taurus	ataxin 10	ATXN10
chr5	118428001	118429000	genes:13221	hypo	9.70096e-44	7.67767e-40	-20.6438	chr5	118304835	118480467	175633	+	9	767927	NM_001077000	Bos taurus	TAFA chemokine like family member 5	TAFA5
chr6	17118001	17119000	genes:9893	hyper	4.09173e-14	1.04025e-11	20.9212	chr6	17084271	17200169	115899	+	3	535399	NM_001192856	Bos taurus	lymphoid enhancer binding factor 1	LEF1
chr6	19347001	19348000	genes:8445	hypo	1.01385e-33	3.96884e-30	-29.9155	chr6	19301426	19453018	151593	-	5	526205	NM_001099035	Bos taurus	glutathione S-transferase C-terminal domain containing	GSTCD
chr6	21826001	21827000	genes:12472	hypo	1.56002e-20	1.25929e-17	-24.4417	chr6	21808278	21851763	43486	+	3	616320	NM_001193108	Bos taurus	solute carrier family 9 member B2	SLC9B2
chr6	113479001	113480000	genes:12969	hyper	6.09393e-65	1.43133e-60	24.3787	chr6	113406640	113504795	98156	+	3	618286	NM_001099176	Bos taurus	TBC1 domain family member 14	TBC1D14
chr7	24470001	24471000	genes:10235	hypo	1.49626e-10	1.62096e-08	-20.3289	chr7	24410759	24678664	267906	-	3	537961	NM_001206114	Bos taurus	ADAM metallopeptidase with thrombospondin type 1 motif 19	ADAMTS19
chr7	27386001	27387000	genes:3772	hypo	1.8218e-22	1.99772e-19	-24.7461	chr7	27359034	27434689	75656	-	5	505627	NM_001079579	Bos taurus	GRAM domain containing 2B	GRAMD2B
chr7	51418001	51419000	genes:13442	hyper	2.11726e-67	5.70969e-63	28.764	chr7	51364569	51435251	70683	+	3	777789	NM_001078164	Bos taurus	cysteine rich transmembrane module containing 1	CYSTM1
chr7	94349001	94350000	genes:9412	hyper	1.05677e-33	4.11473e-30	38.5279	chr7	94267371	94398647	131277	-	5	533635	NM_001104987	Bos taurus	multiple C2 and transmembrane domain containing 1	MCTP1
chr7	106695001	106696000	genes:12577	hypo	2.38579e-35	1.05923e-31	-37.5006	chr7	106497216	106785221	288006	-	5	616742	NM_001076432	Bos taurus	ephrin A5	EFNA5
chr8	7845001	7846000	genes:9146	hyper	1.6978e-20	1.35996e-17	22.9565	chr8	7822307	7874141	51835	-	3	532587	NM_001075968	Bos taurus	BLK proto-oncogene, Src family tyrosine kinase	BLK
chr8	44217001	44218000	genes:323	hyper	9.5782e-27	1.7791e-23	27.1189	chr8	44032278	44271335	239058	-	3	100295817	NM_001191532	Bos taurus	dedicator of cytokinesis 8	DOCK8
chr8	112824001	112825000	genes:9615	hypo	2.57722e-26	4.56575e-23	-24.6883	chr8	112764036	112825614	61579	+	3	534337	NM_001034607	Bos taurus	SH3 and SYLF domain containing 1	SH3YL1
chr11	11929001	11930000	genes:12460	hyper	3.51873e-13	7.2703e-11	20.9131	chr11	11625844	12074247	448404	+	3	616280	NM_001076416	Bos taurus	exocyst complex component 6B	EXOC6B
chr11	15866001	15867000	genes:5429	hyper	2.11433e-49	2.36844e-45	29.8997	chr11	15658508	15930107	271600	+	12	510559	NM_001103091	Bos taurus	latent transforming growth factor beta binding protein 1	LTBP1
chr11	15906001	15907000	genes:5429	hyper	3.6826e-21	3.29812e-18	22.7567	chr11	15658508	15930107	271600	+	4	510559	NM_001103091	Bos taurus	latent transforming growth factor beta binding protein 1	LTBP1
chr11	32932001	32933000	genes:2119	hyper	2.51701e-12	4.28397e-10	22.2023	chr11	32277289	33528044	1250756	-	3	281950	NM_174404	Bos taurus	neurexin 1	NRXN1
chr11	44919001	44920000	genes:12229	hypo	4.41393e-26	7.61581e-23	-33.5376	chr11	44906839	44921512	14674	-	6	615528	NM_001193080	Bos taurus	sulfotransferase family, cytosolic, 1C, member 3	SULT1C3
chr11	82929001	82930000	genes:7971	hypo	6.6134e-24	8.6607e-21	-25.9918	chr11	82739293	83207344	468052	+	4	521982	NM_001192550	Bos taurus	neuroblastoma amplified sequence	NBAS
chr11	83184001	83185000	genes:7971	hypo	4.05701e-18	2.20118e-15	-20.7463	chr11	82739293	83207344	468052	+	4	521982	NM_001192550	Bos taurus	neuroblastoma amplified sequence	NBAS
chr11	106738001	106739000	genes:2418	hyper	3.42419e-31	1.05199e-27	29.8892	chr11	106722392	106933168	210777	+	3	282410	NM_174632	Bos taurus	calcium voltage-gated channel subunit alpha1 B	CACNA1B
chr12	18043001	18044000	genes:5435	hyper	5.47987e-12	8.58803e-10	20.3723	chr12	18036781	18061776	24996	+	4	510575	NM_001035093	Bos taurus	integral membrane protein 2B	ITM2B
chr13	46582001	46583000	genes:9825	hyper	1.5256e-99	9.25703e-95	38.4519	chr13	46527612	46818194	290583	+	20	535136	NM_001206073	Bos taurus	disco interacting protein 2 homolog C	DIP2C
chr14	8223001	8224000	genes:1372	hypo	6.64879e-36	3.10328e-32	-22.1603	chr14	8217497	8453435	235939	-	5	280706	NM_173883	Bos taurus	thyroglobulin	TG
chr14	9801001	9802000	genes:9794	hypo	2.41862e-14	6.48636e-12	-22.9217	chr14	9754216	9979379	225164	+	3	535017	NM_001192841	Bos taurus	adenylate cyclase 8	ADCY8
chr14	10537001	10538000	genes:2780	hyper	1.21792e-23	1.5369e-20	25.5236	chr14	10264574	10604311	339738	+	4	327705	NM_175821	Bos taurus	ArfGAP with SH3 domain, ankyrin repeat and PH domain 1	ASAP1
chr14	10673001	10674000	genes:5229	hyper	1.29703e-16	5.50987e-14	20.678	chr14	10631381	10779140	147760	+	5	510019	NM_001046047	Bos taurus	CYFIP related Rac1 interactor B	CYRIB
chr14	46226001	46227000	genes:10369	hyper	2.64414e-26	4.67294e-23	32.9946	chr14	46164224	46477875	313652	+	5	538602	NM_001098095	Bos taurus	exostosin glycosyltransferase 1	EXT1
chr14	46232001	46233000	genes:10369	hypo	1.59733e-33	6.10837e-30	-22.0683	chr14	46164224	46477875	313652	+	7	538602	NM_001098095	Bos taurus	exostosin glycosyltransferase 1	EXT1
chr14	46237001	46238000	genes:10369	hypo	1.08297e-20	9.0015e-18	-27.2091	chr14	46164224	46477875	313652	+	3	538602	NM_001098095	Bos taurus	exostosin glycosyltransferase 1	EXT1
chr14	46337001	46338000	genes:10369	hypo	5.62182e-20	4.17158e-17	-22.5914	chr14	46164224	46477875	313652	+	3	538602	NM_001098095	Bos taurus	exostosin glycosyltransferase 1	EXT1
chr14	48888001	48889000	genes:10182	hypo	2.19819e-36	1.08145e-32	-22.3514	chr14	48683058	48904942	221885	+	3	537652	NM_001192913	Bos taurus	transcriptional repressor GATA binding 1	TRPS1
chr14	77682001	77683000	genes:7386	hypo	2.73442e-27	5.45476e-24	-22.1382	chr14	77667494	78496157	828664	-	5	516989	NM_001077932	Bos taurus	RALY RNA binding protein like	RALYL
chr14	77687001	77688000	genes:7386	hypo	3.86047e-20	2.94025e-17	-24.8004	chr14	77667494	78496157	828664	-	4	516989	NM_001077932	Bos taurus	RALY RNA binding protein like	RALYL
chr14	77710001	77711000	genes:7386	hypo	7.4515e-112	4.9323e-107	-27.1496	chr14	77667494	78496157	828664	-	7	516989	NM_001077932	Bos taurus	RALY RNA binding protein like	RALYL
chr14	77841001	77842000	genes:7386	hypo	7.26261e-17	3.21072e-14	-21.6115	chr14	77667494	78496157	828664	-	3	516989	NM_001077932	Bos taurus	RALY RNA binding protein like	RALYL
chr15	17054001	17055000	genes:13528	hypo	6.03899e-40	3.79061e-36	-24.7802	chr15	16933740	17058974	125235	-	4	781788	NM_001080341	Bos taurus	alkB homolog 8, tRNA methyltransferase	ALKBH8
chr15	17056001	17057000	genes:13528	hypo	3.93015e-42	2.86162e-38	-45.823	chr15	16933740	17058974	125235	-	10	781788	NM_001080341	Bos taurus	alkB homolog 8, tRNA methyltransferase	ALKBH8
chr15	43217001	43218000	genes:6452	hyper	5.67558e-54	7.65278e-50	32.2258	chr15	43190698	43234275	43578	-	5	513707	NM_001192356	Bos taurus	importin 7	IPO7
chr15	43317001	43318000	genes:12489	hyper	9.06032e-13	1.7104e-10	24.9689	chr15	43311264	43339037	27774	+	5	616372	NM_001099156	Bos taurus	transmembrane protein 41B	TMEM41B
chr15	53172001	53173000	genes:12522	hyper	7.36723e-19	4.53443e-16	21.8901	chr15	53150635	53241473	90839	-	4	616537	NM_001193115	Bos taurus	RAB6A, member RAS oncogene family	RAB6A
chr15	53189001	53190000	genes:12522	hyper	4.61705e-30	1.20927e-26	26.0197	chr15	53150635	53241473	90839	-	5	616537	NM_001193115	Bos taurus	RAB6A, member RAS oncogene family	RAB6A
chr15	76434001	76435000	genes:7420	hyper	4.15694e-47	4.0902e-43	26.4838	chr15	76389709	76562282	172574	-	10	517263	NM_001034522	Bos taurus	autophagy and beclin 1 regulator 1	AMBRA1
chr16	728001	729000	genes:9748	hypo	3.08247e-51	3.56255e-47	-29.2586	chr16	720327	735553	15227	+	3	534797	NM_001034616	Bos taurus	transmembrane protein 183A	TMEM183A
chr16	33376001	33377000	genes:177	hypo	4.01988e-35	1.72174e-31	-28.2879	chr16	33368079	33633753	265675	+	3	100137872	NM_001191309	Bos taurus	AKT serine/threonine kinase 3	AKT3
chr16	33386001	33387000	genes:177	hypo	6.70982e-21	5.78857e-18	-29.959	chr16	33368079	33633753	265675	+	3	100137872	NM_001191309	Bos taurus	AKT serine/threonine kinase 3	AKT3
chr16	33417001	33418000	genes:177	hyper	7.37668e-21	6.31895e-18	26.6418	chr16	33368079	33633753	265675	+	3	100137872	NM_001191309	Bos taurus	AKT serine/threonine kinase 3	AKT3
chr16	33491001	33492000	genes:177	hypo	3.21819e-22	3.37641e-19	-21.8526	chr16	33368079	33633753	265675	+	3	100137872	NM_001191309	Bos taurus	AKT serine/threonine kinase 3	AKT3
chr16	35539001	35540000	genes:1806	hyper	1.17772e-12	2.16491e-10	20.773	chr16	35395767	35882714	486948	+	3	281452	NM_174169	Bos taurus	regulator of G protein signaling 7	RGS7
chr16	64800001	64801000	genes:8017	hypo	2.03663e-44	1.64768e-40	-28.7641	chr16	64794721	64961884	167164	+	4	522344	NM_001205895	Bos taurus	ral guanine nucleotide dissociation stimulator like 1	RGL1
chr16	65060001	65061000	genes:13969	hyper	1.00879e-16	4.35919e-14	21.0261	chr16	64972407	65091021	118615	-	3	789150	NM_001191302	Bos taurus	collagen beta	1-O
chr16	65538001	65539000	genes:13525	hypo	2.74726e-35	1.21232e-31	-22.8807	chr16	65474154	65655685	181532	+	4	781721	NM_001081547	Bos taurus	chromosome 16 C1orf21 homolog	C16H1orf21
chr16	66870001	66871000	genes:7907	hyper	3.16956e-12	5.26899e-10	20.8882	chr16	66706032	67244873	538842	+	4	521326	NM_001192537	Bos taurus	hemicentin 1	HMCN1
chr16	78938001	78939000	genes:11526	hypo	2.07678e-21	1.9263e-18	-20.2002	chr16	78829189	78957232	128044	+	3	541305	NM_001206816	Bos taurus	nuclear receptor subfamily 5 group A member 2	NR5A2
chr17	13475001	13476000	genes:11331	hypo	8.39956e-18	4.34676e-15	-27.4622	chr17	13448750	13558329	109580	-	4	540830	NM_001099114	Bos taurus	hedgehog interacting protein	HHIP
chr17	69561001	69562000	genes:5807	hypo	0.000000000000000000000000000000000000000000000000000000000000000000000000000000000000000000000000000000000000000000000000000000000000000000000000000000000000000000000000000000000000000000000000000000000000000000000000000000000000000000000000000000000000000000000000432146633855187	0.000000000000000000000000000000000000000000000000000000000000000000000000000000000000000000000000000000000000000000000000000000000000000000000000000000000000000000000000000000000000000000000000000000000000000000000000000000000000000000000000000000000000000000104884839913429	-54.5214	chr17	69555266	69568653	13388	-	8	511676	NM_001354818	Bos taurus	pescadillo ribosomal biogenesis factor 1	PES1
chr17	69562001	69563000	genes:5807	hypo	1.0206e-162	9.2891e-158	-23.524	chr17	69555266	69568653	13388	-	8	511676	NM_001354818	Bos taurus	pescadillo ribosomal biogenesis factor 1	PES1
chr19	60652001	60653000	genes:11746	hypo	7.17173e-46	6.60997e-42	-30.4116	chr19	60649493	60652364	2872	-	3	613890	NM_001076294	Bos taurus	potassium inwardly rectifying channel subfamily J member 16	KCNJ16
chr20	31347001	31348000	genes:13463	hypo	1.4974e-20	1.21684e-17	-21.8394	chr20	31333365	31353178	19814	+	3	780867	NM_001079795	Bos taurus	transmembrane protein 267	TMEM267
chr20	48828001	48829000	genes:11502	hypo	2.97383e-25	4.69697e-22	-30.4563	chr20	48812106	48998427	186322	+	4	541259	NM_001076266	Bos taurus	cadherin 10	CDH10
chr20	53837001	53838000	genes:5941	hypo	2.19006e-14	5.93019e-12	-24.2014	chr20	53333437	53936991	603555	+	4	512080	NM_001076837	Bos taurus	cadherin 18	CDH18
chr21	48394001	48395000	genes:5026	hyper	4.6459e-150	3.9887e-146	35.2835	chr21	48394029	48395926	1898	-	4	509367	NM_001077890	Bos taurus	C-type lectin domain containing 14A	CLEC14A
chr21	68204001	68205000	genes:12762	hyper	9.0088e-127	7.4581e-123	34.6787	chr21	68196002	68222814	26813	+	6	617441	NM_001076459	Bos taurus	cytochrome c oxidase assembly factor 8	COA8
chr21	69062001	69063000	genes:12183	hyper	2.8463e-119	2.1992e-115	40.381	chr21	69059946	69068325	8380	+	11	615365	NM_001205388	Bos taurus	chromosome 21 C14orf180 homolog	C21H14orf180
chr22	32653001	32654000	genes:12612	hypo	1.10752e-22	6.77383e-20	-24.4421	chr22	32582455	32789858	207404	+	4	616873	NM_001076435	Bos taurus	TAFA chemokine like family member 4	TAFA4
chr25	10416001	10417000	genes:6379	hyper	9.51671e-33	1.33698e-29	26.5519	chr25	10365541	10425808	60268	-	5	513509	NM_001083420	Bos taurus	thioredoxin domain containing 11	TXNDC11
chr25	35222001	35223000	genes:12732	hyper	2.28798e-62	8.15942e-59	26.5521	chr25	35220789	35383571	162783	-	15	617340	NM_001193154	Bos taurus	collagen type XXVI alpha 1 chain	COL26A1
chr28	30049001	30050000	genes:13661	hypo	6.32902e-24	4.40568e-21	-22.9985	chr28	30038677	30556395	517719	+	3	783572	NM_001076066	Bos taurus	adenosine kinase	ADK
chr28	30050001	30051000	genes:13661	hypo	1.05247e-24	8.18682e-22	-23.5774	chr28	30038677	30556395	517719	+	4	783572	NM_001076066	Bos taurus	adenosine kinase	ADK
chr28	44038001	44039000	genes:8344	hyper	1.7299e-40	3.23385e-37	26.1832	chr28	44036735	44059067	22333	-	9	525329	NM_001075868	Bos taurus	nuclear receptor coactivator 4	NCOA4
chr29	48813001	48814000	genes:13742	hypo	1.03976e-85	6.18e-82	-22.3865	chr29	48760248	49139375	379128	-	3	784876	NM_001205441	Bos taurus	potassium voltage-gated channel subfamily Q member 1	KCNQ1
chrX	133365001	133366000	genes:7216	hyper	1.883e-84	1.0646e-80	28.8969	chrX	133340568	133399189	58622	-	3	515972	NM_001145232	Bos taurus	transducin beta like 1 X-linked	TBL1X
